# Supplementary material for: Transcriptional and Metabolic Responses of Maize Shoots to Long-Term Potassium Deficiency
Source: Front Plant Sci. 2022 Jun 23;13:922581. doi: 10.3389/fpls.2022.922581 (PMC9260415; doi:10.3389/fpls.2022.922581)
Supplement: Supplementary file 2 [file Data_Sheet_2.xlsx]

## Sheet: Table S1
Table S1: Information for the RNA-seq libraries used in this study.
Sample	Raw Reads	Clean Reads	Clean Base(G)	Q20(%)
Z58-CK1	47712638	45719026	6.86	98.25
Z58-CK2	55196080	53623498	8.04	98.24
Z58-CK3	51574996	49464268	7.42	98.24
Z58-LK1	47055316	45129628	6.77	97.52
Z58-LK2	44073884	42312836	6.35	97.76
Z58-LK3	43330646	41895186	6.28	97.65
DH605-CK1	43135308	41532254	6.23	98.03
DH605-CK2	42571130	40863140	6.13	97.89
DH605-CK3	49540148	47738916	7.16	98.13
DH605-LK1	46673838	44853518	6.73	98.16
DH605-LK2	47668588	45802756	6.87	98.08
DH605-LK3	45438548	44021542	6.6	98.06

## Sheet: Table S2a
Table S2: Differentially expressed genes of established transcriptional K+ deficiency in relative to control in DH605 (a) and Z58 (b).
ID	chr.	start	end	strand	4 mM	4 mM	4 mM	0.1 mM	0.1 mM	0.1 mM	log2FoldChange	pvalue	padj	regulated	KEGG pathway	NR	Swissprot	Tremble	KOG	GO	Pfam
gene-an2	NC_050096.1	80515829	80520523	+	0.24	0.28	0.53	4.01	0.9	2.85	2.748	3.84488e-05	0.00248142	up	K04120 ent-copalyl diphosphate synthase [EC:5.5.1.13] | (RefSeq) an2; kaurene synthase 2 (A)	kaurene synthase 2 [Zea mays]	RecName: Full=Ent-copalyl diphosphate synthase 1, chloroplastic; Short=Ent-CDP synthase 1; Short=OsCPS1; Short=OsCPS1ent; EC=5.5.1.13; AltName: Full=Ent-kaurene synthase A; AltName: Full=OsCPS; Flags: Precursor;	SubName: Full=Copalyl diphosphate synthase2 {ECO:0000313|EMBL:ONL99283.1};	--	GO:0009507,chloroplast; GO:0009905,ent-copalyl diphosphate synthase activity; GO:0000287,magnesium ion binding; GO:0010333,terpene synthase activity; GO:0009686,gibberellin biosynthetic process; GO:0009685,gibberellin metabolic process	PF01397.21:Terpene synthase, N-terminal domain
gene-aoc2	NC_050104.1	130640215	130641457	-	13.96	24.09	26.58	12.07	13.37	9.98	-1.056	2.06222e-06	0.000210461	down	K10525 allene oxide cyclase [EC:5.3.99.6] | (RefSeq) allene oxide cyclase 4 (A)	unknown [Zea mays]	RecName: Full=Allene oxide cyclase, chloroplastic {ECO:0000303|Ref.1, ECO:0000303|Ref.2}; Short=OsAOC {ECO:0000303|Ref.1}; EC=5.3.99.6 {ECO:0000269|PubMed:23347338}; AltName: Full=Protein COLEOPTILE PHOTOMORPHOGENESIS 2 {ECO:0000303|PubMed:23347338}; AltName: Full=Protein HEBIBA {ECO:0000303|PubMed:14605232}; Flags: Precursor;	SubName: Full=Allene oxide cyclase 3 chloroplastic {ECO:0000313|EMBL:AQL06179.1};	--	GO:0009507,chloroplast; GO:0046423,allene-oxide cyclase activity; GO:0009734,auxin-activated signaling pathway; GO:0007623,circadian rhythm; GO:0050832,defense response to fungus; GO:0080186,developmental vegetative growth; GO:0009908,flower development; GO:0009864,induced systemic resistance, jasmonic acid mediated signaling pathway; GO:0009695,jasmonic acid biosynthetic process; GO:0048573,phot…	PF06351.11:Allene oxide cyclase
gene-gpm925	NC_050096.1	250552704	250553573	+	4.31	8.27	5.49	0.76	1.16	1.73	-2.444	1.28e-06	0.000138286	down	K13464 jasmonate ZIM domain-containing protein | (RefSeq) gpm925; uncharacterized protein LOC100284894 (A)	uncharacterized protein LOC100284894 [Zea mays]	RecName: Full=Protein TIFY 11e {ECO:0000305}; Short=OsTIFY11e {ECO:0000303|PubMed:19618278}; AltName: Full=Jasmonate ZIM domain-containing protein 13 {ECO:0000305}; Short=OsJAZ13 {ECO:0000303|PubMed:19618278};	SubName: Full=TIFY9 {ECO:0000313|EMBL:AND66093.1}; SubName: Full=ZIM motif family protein {ECO:0000313|EMBL:ACG42158.1}; SubName: Full=ZIM transcription factor {ECO:0000313|EMBL:AIB04472.1};	--	GO:0005634,nucleus; GO:0003714,transcription corepressor activity; GO:1903507,negative regulation of nucleic acid-templated transcription; GO:0031347,regulation of defense response; GO:2000022,regulation of jasmonic acid mediated signaling pathway; GO:0006355,regulation of transcription, DNA-templated; GO:0009611,response to wounding; GO:0006351,transcription, DNA-templated	PF06200.14:tify domain
gene-LOC100037765	NC_050098.1	154099411	154100750	+	2.87	15.3	20.77	73.24	74.66	80.35	2.48	2.94229e-05	0.00196771	up	K19893 glucan endo-1,3-beta-glucosidase 5/6 [EC:3.2.1.39] | (RefSeq) glucan endo-1,3-beta-glucosidase 6-like (A)	glucan endo-1,3-beta-glucosidase, acidic isoform precursor [Zea mays]	RecName: Full=Glucan endo-1,3-beta-glucosidase, acidic isoform; EC=3.2.1.39; AltName: Full=(1->3)-beta-glucan endohydrolase; Short=(1->3)-beta-glucanase; AltName: Full=Beta-1,3-endoglucanase; Flags: Precursor;	SubName: Full=Glucan endo-13-beta-glucosidase homolog1 {ECO:0000313|EMBL:ONM34640.1};	--	GO:0005615,extracellular space; GO:0042973,glucan endo-1,3-beta-D-glucosidase activity; GO:0005975,carbohydrate metabolic process; GO:0006952,defense response	PF00332.18:Glycosyl hydrolases family 17
gene-LOC100037799	NC_050102.1	173290657	173293117	+	1.07	1.21	0.64	4.99	3.51	6.34	2.163	3.90028e-05	0.00250621	up	--	brittle stalk-2-like protein 6 precursor [Zea mays]	RecName: Full=COBRA-like protein 1; AltName: Full=Protein BRITTLE CULM1-like 6; Flags: Precursor;	RecName: Full=COBRA-like protein {ECO:0000256|PIRNR:PIRNR038122};	--	GO:0031225,anchored component of membrane; GO:0005886,plasma membrane; GO:0016049,cell growth; GO:0010215,cellulose microfibril organization	PF04833.15:COBRA-like protein
gene-LOC100037813	NC_050098.1	33993140	33993707	+	5.64	5.94	9.08	57.44	26.96	51.09	2.551	3.52922e-08	6.50567e-06	up	--	uncharacterized LOC100037813 precursor [Zea mays]	--	SubName: Full=Putative serine type endopeptidase inhibitor {ECO:0000313|EMBL:ABN54444.1};	--	GO:0004867,serine-type endopeptidase inhibitor activity; GO:0006979,response to oxidative stress	PF02428.15:Potato type II proteinase inhibitor family
gene-LOC100037814	NC_050105.1	100085171	100085941	+	11.47	40.05	36.95	280.57	161.61	180.4	2.687	2.95883e-09	7.09493e-07	up	--	putative Bowman-Birk serine protease inhibitor precursor [Zea mays]	RecName: Full=Bowman-Birk type trypsin inhibitor; Short=WTI;	SubName: Full=Bowman-Birk type trypsin inhibitor {ECO:0000313|EMBL:ACG33560.1}; SubName: Full=Putative Bowman-Birk serine protease inhibitor {ECO:0000313|EMBL:ABN54445.1};	--	GO:0005576,extracellular region; GO:0004867,serine-type endopeptidase inhibitor activity	PF00228.20:Bowman-Birk serine protease inhibitor family
gene-LOC100101543	NC_050104.1	11189145	11190738	-	1.08	2.32	1.69	5.72	8.39	2.83	1.487	0.000318239	0.0132522	up	K22382 WD repeat-containing protein 26 | (RefSeq) WD repeat-containing protein 26 homolog (A)	Growth-regulating factor 6 [Zea mays]	RecName: Full=Growth-regulating factor 2; Short=OsGRF2; AltName: Full=Transcription activator GRF2;	SubName: Full=Uncharacterized protein {ECO:0000313|EnsemblPlants:Zm00001d000238_P001};	--	GO:0005634,nucleus; GO:0005524,ATP binding; GO:0032502,developmental process; GO:0006355,regulation of transcription, DNA-templated; GO:0006351,transcription, DNA-templated	PF08879.10:WRC
gene-LOC100126361	NC_050099.1	186365747	186368182	-	14.53	12.85	11.93	7.99	6.78	6.54	-1.135	0.00058728	0.0216029	down	K17710 pentatricopeptide repeat domain-containing protein 1 | (RefSeq) putative pentatricopeptide repeat-containing protein At2g02150 (A)	pentatricopeptide repeat-containing protein PPR5, chloroplastic [Zea mays]	RecName: Full=Pentatricopeptide repeat-containing protein PPR5, chloroplastic {ECO:0000305}; AltName: Full=Pentatricopeptide repeat-containing protein 5 {ECO:0000303|PubMed:18591259}; Short=ZmPPR5 {ECO:0000303|PubMed:18591259}; Flags: Precursor;	SubName: Full=Uncharacterized protein {ECO:0000313|EMBL:KXG30749.1};	FOG: PPR repeat	GO:0009507,chloroplast; GO:0003727,single-stranded RNA binding; GO:0031425,chloroplast RNA processing; GO:0000373,Group II intron splicing; GO:0006397,mRNA processing; GO:0006417,regulation of translation	PF13041.6:PPR repeat family
gene-LOC100127517	NC_050099.1	194472409	194473349	-	0.08	0.34	0.28	2.45	5.44	3.66	3.857	4.74167e-08	8.22651e-06	up	K06910 phosphatidylethanolamine-binding protein | (RefSeq) ZCN6; ZCN6 protein (A)	ZCN6 [Zea mays]	RecName: Full=Protein SELF-PRUNING;	SubName: Full=RCN1-Corn Centroradialis/TFL1-like protein {ECO:0000313|EMBL:ACG45277.1}; SubName: Full=ZCN6 {ECO:0000313|EMBL:ABX11008.1};	Phosphatidylethanolamine binding protein	GO:0005737,cytoplasm; GO:0005634,nucleus; GO:0009910,negative regulation of flower development; GO:0010228,vegetative to reproductive phase transition of meristem	PF01161.20:Phosphatidylethanolamine-binding protein
gene-LOC100127518	NC_050101.1	170680685	170682221	-	1.14	1.44	0.81	0.18	0.35	0	-2.992	0.00138174	0.0399931	down	K16223 protein FLOWERING LOCUS T | (RefSeq) protein HEADING DATE 3A-like (A)	ZCN7 protein [Zea mays]	RecName: Full=Protein HEADING DATE 3A; AltName: Full=FT-like protein A;	SubName: Full=ZCN7 {ECO:0000313|EMBL:ABW96230.1};	Phosphatidylethanolamine binding protein	GO:0005737,cytoplasm; GO:0005634,nucleus; GO:0008429,phosphatidylethanolamine binding; GO:0030154,cell differentiation; GO:0009908,flower development; GO:0010229,inflorescence development; GO:0009909,regulation of flower development; GO:0048510,regulation of timing of transition from vegetative to reproductive phase; GO:0048572,short-day photoperiodism; GO:0048575,short-day photoperiodism, flower…	PF01161.20:Phosphatidylethanolamine-binding protein
gene-LOC100127529	NC_050105.1	37083502	37084683	-	0	0	0	0.63	1.23	0.96	6.093	1.62958e-05	0.00121065	up	K16223 protein FLOWERING LOCUS T | (RefSeq) protein TWIN SISTER of FT-like (A)	protein TWIN SISTER of FT [Zea mays]	RecName: Full=Protein TWIN SISTER of FT; AltName: Full=TFL1-like protein;	SubName: Full=Protein FLOWERING LOCUS T {ECO:0000313|EMBL:AQK40557.1}; SubName: Full=ZCN20 {ECO:0000313|EMBL:ABX11022.1};	Phosphatidylethanolamine binding protein	GO:0005737,cytoplasm; GO:0008429,phosphatidylethanolamine binding; GO:0048573,photoperiodism, flowering; GO:0009911,positive regulation of flower development	PF01161.20:Phosphatidylethanolamine-binding protein
gene-LOC100127535	NC_050097.1	183356518	183357383	-	8.91	13.46	7.97	71.66	66.39	123.76	2.976	1.26939e-09	3.43481e-07	up	--	AN17 [Zea mays]	RecName: Full=Zinc finger AN1 domain-containing stress-associated protein 17; Short=OsSAP17;	SubName: Full=AN17 {ECO:0000313|EMBL:ABS83247.1};	Predicted Zn-finger protein	GO:0008270,zinc ion binding; GO:0009737,response to abscisic acid; GO:0010200,response to chitin	PF01428.16:AN1-like Zinc finger
gene-LOC100135422	NC_050105.1	89065195	89065637	-	26.38	39.66	28.61	132.83	128.99	185.99	2.089	7.74112e-08	1.26843e-05	up	K03260 translation initiation factor 4G | (RefSeq) eukaryotic translation initiation factor-like (A)	uncharacterized LOC100135422 [Zea mays]	RecName: Full=Hydrophobic protein LTI6B; AltName: Full=Low temperature-induced protein 6B;	SubName: Full=Hydrophobic protein RCI2B {ECO:0000313|EMBL:AQK42010.1};	Stress responsive protein	GO:0016021,integral component of membrane; GO:0009737,response to abscisic acid; GO:0009409,response to cold; GO:0009651,response to salt stress	PF01679.17:Proteolipid membrane potential modulator
gene-LOC100141385	NC_050099.1	189373554	189376254	-	8.49	8.84	11.88	27.91	26.69	21.03	1.148	2.89105e-07	3.92942e-05	up	K07198 5'-AMP-activated protein kinase, catalytic alpha subunit [EC:2.7.11.11] | (RefSeq) CBL-interacting protein kinase (A)	CBL-interacting protein kinase [Zea mays]	RecName: Full=CBL-interacting protein kinase 14; EC=2.7.11.1; AltName: Full=OsCIPK14;	RecName: Full=Non-specific serine/threonine protein kinase {ECO:0000256|SAAS:SAAS00351747}; EC=2.7.11.1 {ECO:0000256|SAAS:SAAS00351747};	Serine/threonine protein kinase	GO:0005622,intracellular; GO:0005524,ATP binding; GO:0004674,protein serine/threonine kinase activity; GO:0035556,intracellular signal transduction; GO:0018105,peptidyl-serine phosphorylation; GO:0018107,peptidyl-threonine phosphorylation	PF00069.25:Protein kinase domain
gene-LOC100147737	NC_050102.1	120042966	120044708	-	0.26	1.11	0.63	9.55	11.15	15.59	4.104	5.86396e-14	4.02213e-11	up	K13424 WRKY transcription factor 33 | (RefSeq) probable WRKY transcription factor 26 (A)	WRKY DNA-binding protein [Zea mays]	RecName: Full=WRKY transcription factor WRKY76 {ECO:0000303|PubMed:15047897}; Short=OsWRKY76 {ECO:0000303|PubMed:15047897};	SubName: Full=Putative WRKY transcription factor 40 {ECO:0000313|EMBL:ONM55008.1}; SubName: Full=WRKY DNA-binding protein {ECO:0000313|EMBL:ACB12743.1}; SubName: Full=WRKY transcription factor {ECO:0000313|EMBL:AIB04301.1};	--	GO:0005634,nucleus; GO:0003700,DNA-binding transcription factor activity; GO:0043565,sequence-specific DNA binding; GO:0009617,response to bacterium; GO:0010200,response to chitin; GO:0009620,response to fungus; GO:0006351,transcription, DNA-templated	PF03106.15:WRKY DNA -binding domain
gene-LOC100191170	NC_050096.1	284893353	284896888	-	2.74	2.03	1.72	8.28	5.56	12.03	1.798	0.00127997	0.037941	up	K12835 ATP-dependent RNA helicase DDX42 [EC:3.6.4.13] | (RefSeq) DEAD-box ATP-dependent RNA helicase 24 isoform X1 (A)	putative WRKY DNA-binding domain superfamily protein [Zea mays]	RecName: Full=Probable WRKY transcription factor 57; AltName: Full=WRKY DNA-binding protein 57;	SubName: Full=Putative WRKY transcription factor 57 {ECO:0000313|EMBL:ONM09498.1};	--	GO:0005634,nucleus; GO:0003700,DNA-binding transcription factor activity; GO:0043565,sequence-specific DNA binding; GO:0044212,transcription regulatory region DNA binding; GO:0006970,response to osmotic stress; GO:0009651,response to salt stress; GO:0009414,response to water deprivation; GO:0006351,transcription, DNA-templated	PF03106.15:WRKY DNA -binding domain
gene-LOC100191184	NC_050101.1	132735589	132738167	+	9.41	16.44	15.84	29.41	41.59	25.67	1.009	1.71672e-05	0.00126266	up	K20721 reticulon-1 | (RefSeq) reticulon-like protein B1 (A)	reticulon [Zea mays]	RecName: Full=Reticulon-like protein B2; Short=AtRTNLB2; AltName: Full=VirB2-interacting protein 2;	RecName: Full=Reticulon-like protein {ECO:0000256|RuleBase:RU363132};	Reticulon	GO:0005783,endoplasmic reticulum; GO:0005789,endoplasmic reticulum membrane; GO:0071782,endoplasmic reticulum tubular network; GO:0005794,Golgi apparatus; GO:0071458,integral component of cytoplasmic side of endoplasmic reticulum membrane; GO:0005886,plasma membrane; GO:0071786,endoplasmic reticulum tubular network organization	PF02453.17:Reticulon
gene-LOC100191201	NC_050100.1	168020517	168023641	-	12.03	13.74	7.38	45.06	32.68	35.82	1.534	0.000169315	0.00805449	up	K18696 glycerophosphodiester phosphodiesterase [EC:3.1.4.46] | (RefSeq) glycerophosphodiester phosphodiesterase (A)	glycerophosphodiester phosphodiesterase [Zea mays]	RecName: Full=Glycerophosphodiester phosphodiesterase GDPD1, chloroplastic {ECO:0000305}; EC=3.1.4.46 {ECO:0000269|PubMed:21323773}; AltName: Full=Glycerophosphodiester phosphodiesterase 1 {ECO:0000303|PubMed:21323773}; Short=AtGDPD1 {ECO:0000303|PubMed:21323773}; AltName: Full=Protein SENESCENCE-RELATED GENE 3 {ECO:0000303|PubMed:8883383}; Flags: Precursor;	SubName: Full=Glycerophosphodiester phosphodiesterase GDPD2 {ECO:0000313|EMBL:AQK71218.1};	Predicted starch-binding protein	GO:0009507,chloroplast; GO:0009536,plastid; GO:0008889,glycerophosphodiester phosphodiesterase activity; GO:0000287,magnesium ion binding; GO:0030643,cellular phosphate ion homeostasis; GO:0006071,glycerol metabolic process; GO:0046475,glycerophospholipid catabolic process	PF03009.17:Glycerophosphoryl diester phosphodiesterase family
gene-LOC100191438	NC_050097.1	29786178	29790160	+	0.02	0.04	0.02	0.17	0.27	0.57	3.566	0.0010365	0.0324529	up	K05391 cyclic nucleotide gated channel, plant | (RefSeq) cyclic nucleotide-gated ion channel 1-like (A)	putative WAK family receptor-like protein kinase isoform X1 [Zea mays]	RecName: Full=Wall-associated receptor kinase 5; EC=2.7.11.-; Flags: Precursor;	SubName: Full=Wall-associated receptor kinase-like 8 {ECO:0000313|EMBL:ONM15908.1};	--	GO:0016021,integral component of membrane; GO:0005524,ATP binding; GO:0005509,calcium ion binding; GO:0030247,polysaccharide binding; GO:0004674,protein serine/threonine kinase activity; GO:0007166,cell surface receptor signaling pathway	PF00069.25:Protein kinase domain
gene-LOC100191524	NC_050104.1	153924314	153926432	-	0.89	2.62	0.93	6.86	7.53	12.26	2.492	1.41343e-05	0.0010772	up	K01102 pyruvate dehydrogenase phosphatase [EC:3.1.3.43] | (RefSeq) probable protein phosphatase 2C 78 (A)	uncharacterized protein LOC100191524 [Zea mays]	RecName: Full=Probable protein phosphatase 2C 29; Short=OsPP2C29; EC=3.1.3.16;	SubName: Full=Orphans transcription factor {ECO:0000313|EMBL:AIB05426.1};	Protein phosphatase 2C/pyruvate dehydrogenase (lipoamide) phosphatase	GO:0046872,metal ion binding; GO:0004722,protein serine/threonine phosphatase activity	PF00481.21:Protein phosphatase 2C
gene-LOC100191533	NC_050096.1	220215528	220216968	-	0.05	0.14	0	1.13	0.66	3.49	4.862	5.45933e-05	0.00326071	up	K09422 transcription factor MYB, plant | (RefSeq) putative MYB DNA-binding domain superfamily protein (A)	putative MYB DNA-binding domain superfamily protein isoform X1 [Zea mays]	RecName: Full=Transcription factor MYB20 {ECO:0000305}; AltName: Full=Myb-related protein 20 {ECO:0000303|PubMed:16463103}; Short=AtMYB20 {ECO:0000303|PubMed:11597504};	SubName: Full=Uncharacterized protein {ECO:0000313|EMBL:ACF81234.1};	Transcription factor, Myb superfamily	GO:0005634,nucleus; GO:0001046,core promoter sequence-specific DNA binding; GO:0003700,DNA-binding transcription factor activity; GO:0000981,DNA-binding transcription factor activity, RNA polymerase II-specific; GO:0043565,sequence-specific DNA binding; GO:0001135,RNA polymerase II transcription regulator recruiting activity; GO:0044212,transcription regulatory region DNA binding; GO:0030154,cell…	PF00249.31:Myb-like DNA-binding domain
gene-LOC100191552	NC_050096.1	38791422	38792252	+	0.4	0.4	0.46	3.31	1.45	2.75	2.398	0.000114176	0.00596019	up	K13993 HSP20 family protein | (RefSeq) class I heat shock protein 3 (A)	class I heat shock protein 3 [Zea mays]	RecName: Full=17.7 kDa class I heat shock protein; AltName: Full=17.7 kDa heat shock protein; Short=OsHsp17.7;	SubName: Full=17.4 kDa class I heat shock protein {ECO:0000313|EMBL:ONL96399.1}; SubName: Full=17.4 kDa class I heat shock protein 3 {ECO:0000313|EMBL:ACG33226.1};	Molecular chaperone (small heat-shock protein Hsp26/Hsp42)	GO:0005737,cytoplasm; GO:0046685,response to arsenic-containing substance; GO:0046686,response to cadmium ion; GO:0046688,response to copper ion; GO:0045471,response to ethanol; GO:0009408,response to heat; GO:0042542,response to hydrogen peroxide	PF00011.21:Hsp20/alpha crystallin family
gene-LOC100191554	NC_050100.1	189353173	189354865	+	5.21	2.77	2.37	0	0.3	0.37	-4.202	1.48399e-05	0.00111941	down	K03320 ammonium transporter, Amt family | (RefSeq) uncharacterized protein LOC100191554 (A)	uncharacterized protein LOC100191554 [Zea mays]	RecName: Full=Ammonium transporter 1 member 2; Short=OsAMT1;2;	RecName: Full=Ammonium transporter {ECO:0000256|RuleBase:RU362002};	Ammonia permease	GO:0005887,integral component of plasma membrane; GO:0008519,ammonium transmembrane transporter activity; GO:0072488,ammonium transmembrane transport; GO:0015695,organic cation transport	PF00909.21:Ammonium Transporter Family
gene-LOC100191590	NC_050097.1	235626694	235627634	-	2.17	3.56	1.31	4.71	10.95	20.44	2.257	0.00175116	0.0473271	up	K15042 importin subunit alpha-6/7 | (RefSeq) uncharacterized protein LOC107886243 (A)	uncharacterized protein LOC100191590 [Zea mays]	--	SubName: Full=Uncharacterized protein {ECO:0000313|EMBL:ACF78726.1, ECO:0000313|EnsemblPlants:Zm00001d007624_P001};	--	GO:0005622,intracellular; GO:0035556,intracellular signal transduction	PF03107.16:C1 domain
gene-LOC100191592	NC_050096.1	7344161	7345473	+	0.76	1.16	2.76	11.98	15.35	8.4	2.732	1.61086e-09	4.22746e-07	up	K20547 basic endochitinase B [EC:3.2.1.14] | (RefSeq) basic endochitinase precursor (A)	basic endochitinase precursor [Zea mays]	RecName: Full=Chitinase 11; EC=3.2.1.14; AltName: Full=Pathogenesis related (PR)-3 chitinase 11; Flags: Precursor;	SubName: Full=Basic endochitinase B {ECO:0000313|EMBL:ONL93372.1};	Predicted chitinase	GO:0004568,chitinase activity; GO:0016998,cell wall macromolecule catabolic process; GO:0006032,chitin catabolic process; GO:0000272,polysaccharide catabolic process	PF00182.19:Chitinase class I
gene-LOC100191593	NC_050099.1	10718962	10719780	-	6.17	24.03	20.84	118.79	77.95	113.8	2.516	3.09431e-07	4.12957e-05	up	--	uncharacterized protein LOC100191593 precursor [Zea mays]	RecName: Full=Barwin;	SubName: Full=Hevein-like preproprotein {ECO:0000313|EMBL:AQK49231.1};	Predicted chitinase	GO:0030246,carbohydrate binding; GO:0042742,defense response to bacterium; GO:0050832,defense response to fungus	PF00967.17:Barwin family
gene-LOC100191602	NC_050099.1	21621306	21622702	+	0	0	0	2.23	0.73	1.23	7.345	1.13481e-07	1.78984e-05	up	K16292 KDEL-tailed cysteine endopeptidase [EC:3.4.22.-] | (RefSeq) senescence-specific cysteine protease SAG39 (A)	cysteine protease 1 [Zea mays]	RecName: Full=Senescence-specific cysteine protease SAG39 {ECO:0000305}; EC=3.4.22.- {ECO:0000305}; AltName: Full=Cysteine proteinase SAG39 {ECO:0000305}; AltName: Full=Protein SENESCENCE-ASSOCIATED GENE 39 {ECO:0000303|PubMed:20439547}; Flags: Precursor;	SubName: Full=Senescence-specific cysteine protease SAG12 {ECO:0000313|EMBL:AQK49884.1};	Cysteine proteinase Cathepsin L	GO:0005615,extracellular space; GO:0005764,lysosome; GO:0010282,senescence-associated vacuole; GO:0004197,cysteine-type endopeptidase activity; GO:0007568,aging; GO:0010150,leaf senescence; GO:0010623,programmed cell death involved in cell development; GO:0051603,proteolysis involved in cellular protein catabolic process; GO:0009737,response to abscisic acid; GO:0009723,response to ethylene; GO:0…	PF00112.23:Papain family cysteine protease
gene-LOC100191617	NC_050097.1	232266439	232268161	-	1.54	6.64	10.24	2.57	1.75	1.11	-1.904	0.00159283	0.0445552	down	K08237 hydroquinone glucosyltransferase [EC:2.4.1.218] | (RefSeq) hydroquinone glucosyltransferase (A)	hydroquinone glucosyltransferase [Zea mays]	RecName: Full=UDP-glycosyltransferase 72B3; EC=2.4.1.-;	RecName: Full=Glycosyltransferase {ECO:0000256|RuleBase:RU362057}; EC=2.4.1.- {ECO:0000256|RuleBase:RU362057};	UDP-glucuronosyl and UDP-glucosyl transferase	GO:0005783,endoplasmic reticulum; GO:0080043,quercetin 3-O-glucosyltransferase activity; GO:0080044,quercetin 7-O-glucosyltransferase activity; GO:0008152,metabolic process	PF00201.18:UDP-glucoronosyl and UDP-glucosyl transferase
gene-LOC100191625	NC_050103.1	67546570	67552748	+	7.16	14.16	15.8	9.11	6.02	4.56	-1.108	0.000720428	0.0251757	down	K08730 phosphatidylserine synthase 2 [EC:2.7.8.29] | (RefSeq) CDP-diacylglycerol--serine O-phosphatidyltransferase 2 (A)	phosphatidylserine synthase 2 [Zea mays]	RecName: Full=CDP-diacylglycerol--serine O-phosphatidyltransferase 2; EC=2.7.8.8; AltName: Full=Phosphatidylserine synthase 2;	SubName: Full=Phosphatidylserine synthase 2 {ECO:0000313|EMBL:ACG28894.1};	Phosphatidylserine synthase	GO:0005789,endoplasmic reticulum membrane; GO:0016021,integral component of membrane; GO:0003882,CDP-diacylglycerol-serine O-phosphatidyltransferase activity; GO:0006646,phosphatidylethanolamine biosynthetic process; GO:0006659,phosphatidylserine biosynthetic process	PF03034.15:Phosphatidyl serine synthase
gene-LOC100191675	NC_050101.1	153776547	153778401	+	0.48	1.23	0.82	3.02	2.09	4.28	1.801	0.000790783	0.0271202	up	K20769 fatty acid omega-hydroxylase [EC:1.14.-.-] | (RefSeq) cytochrome P450 94A1-like (A)	putative cytochrome P450 superfamily protein precursor [Zea mays]	RecName: Full=Cytochrome P450 94A1; EC=1.14.-.-; AltName: Full=P450-dependent fatty acid omega-hydroxylase;	SubName: Full=Cytochrome P450 CYP94E4 {ECO:0000313|EMBL:ACG25151.1}; SubName: Full=Cytochrome P450 family 94 subfamily D polypeptide 2 {ECO:0000313|EMBL:AQK85542.1};	Cytochrome P450 CYP4/CYP19/CYP26 subfamilies	GO:0005789,endoplasmic reticulum membrane; GO:0016021,integral component of membrane; GO:0020037,heme binding; GO:0005506,iron ion binding; GO:0004497,monooxygenase activity; GO:0016705,oxidoreductase activity, acting on paired donors, with incorporation or reduction of molecular oxygen	PF00067.22:Cytochrome P450
gene-LOC100191717	NC_050098.1	35203225	35204996	-	32.94	20.47	14.6	6.38	5.37	9.86	-1.894	0.00131336	0.0386589	down	K11324 DNA methyltransferase 1-associated protein 1 | (RefSeq) SWR1-complex protein 4 (A)	uncharacterized protein LOC100191717 isoform X1 [Zea mays]	--	SubName: Full=Uncharacterized protein {ECO:0000313|EMBL:ACF78908.1};	--	GO:0016021,integral component of membrane	--
gene-LOC100191734	NC_050100.1	14658154	14676657	+	0.03	0.17	0.25	1	0.99	0.97	2.539	3.82051e-06	0.000358676	up	K20606 mitogen-activated protein kinase kinase kinase ANP1 [EC:2.7.11.25] | (RefSeq) receptor-like serine/threonine-protein kinase SD1-7 isoform X1 (A)	uncharacterized protein LOC100191734 isoform X2 [Zea mays]	RecName: Full=Cysteine-rich receptor-like protein kinase 6 {ECO:0000305}; Short=Cysteine-rich RLK6 {ECO:0000305}; EC=2.7.11.- {ECO:0000305}; Flags: Precursor;	SubName: Full=Uncharacterized protein {ECO:0000313|EMBL:EER91100.1};	--	GO:0016021,integral component of membrane; GO:0005886,plasma membrane; GO:0005524,ATP binding; GO:0004672,protein kinase activity; GO:0004674,protein serine/threonine kinase activity; GO:0042742,defense response to bacterium	PF00069.25:Protein kinase domain
gene-LOC100191750	NC_050101.1	83214743	83216532	+	0.62	1.9	1.24	4.78	3.76	7.59	2.03	0.00020546	0.00942433	up	K13065 shikimate O-hydroxycinnamoyltransferase [EC:2.3.1.133] | (RefSeq) anthranilate N-benzoyltransferase protein 3-like (A)	transferase [Zea mays]	RecName: Full=Anthranilate N-benzoyltransferase protein 1; EC=2.3.1.144; AltName: Full=Anthranilate N-hydroxycinnamoyl/benzoyltransferase 1;	SubName: Full=HXXXD-type acyl-transferase family protein {ECO:0000313|EMBL:AQK80429.1};	--	GO:0047672,anthranilate N-benzoyltransferase activity; GO:0009813,flavonoid biosynthetic process	PF02458.15:Transferase family
gene-LOC100191755	NC_050102.1	120462928	120464810	+	42.07	58.35	57.67	173.98	170.2	188.02	1.575	2.66997e-09	6.56233e-07	up	K07198 5'-AMP-activated protein kinase, catalytic alpha subunit [EC:2.7.11.11] | (RefSeq) CBL-interacting serine/threonine-protein kinase 6-like (A)	uncharacterized protein LOC100191755 [Zea mays]	RecName: Full=CBL-interacting protein kinase 6; EC=2.7.11.1; AltName: Full=OsCIPK06;	RecName: Full=Non-specific serine/threonine protein kinase {ECO:0000256|SAAS:SAAS00351747}; EC=2.7.11.1 {ECO:0000256|SAAS:SAAS00351747};	Serine/threonine protein kinase	GO:0005622,intracellular; GO:0005524,ATP binding; GO:0004674,protein serine/threonine kinase activity; GO:0035556,intracellular signal transduction; GO:0018105,peptidyl-serine phosphorylation; GO:0018107,peptidyl-threonine phosphorylation	PF00069.25:Protein kinase domain
gene-LOC100191783	NC_050099.1	191928412	191933592	-	3.84	3.69	4.37	17.13	14.41	21.7	1.985	3.66626e-07	4.80589e-05	up	K12818 ATP-dependent RNA helicase DHX8/PRP22 [EC:3.6.4.13] | (RefSeq) hypothetical protein (A)	carbohydrate transporter/ sugar porter/ transporter isoform X1 [Zea mays]	RecName: Full=Protein ZINC INDUCED FACILITATOR-LIKE 1; AltName: Full=Protein ZIF-LIKE 1;	SubName: Full=Putative peptide/nitrate transporter {ECO:0000313|EMBL:AQK57211.1};	Permease of the major facilitator superfamily	GO:0016021,integral component of membrane; GO:0009705,plant-type vacuole membrane; GO:0005886,plasma membrane; GO:0022821,potassium ion antiporter activity; GO:0010540,basipetal auxin transport; GO:0009630,gravitropism; GO:0090333,regulation of stomatal closure; GO:0080167,response to karrikin; GO:0009414,response to water deprivation; GO:0048364,root development	PF07690.16:Major Facilitator Superfamily
gene-LOC100191787	NC_050098.1	192862693	192865780	+	0.18	0.24	0.58	0.05	0	0	-4.398	0.0010706	0.0331685	down	K13947 auxin efflux carrier family | (RefSeq) PIN9; putative auxin efflux carrier PIN9 (A)	putative auxin efflux carrier PIN9 [Zea mays]	RecName: Full=Probable auxin efflux carrier component 9 {ECO:0000305}; Short=OsPIN9 {ECO:0000303|Ref.6};	RecName: Full=Auxin efflux carrier component {ECO:0000256|RuleBase:RU362108};	--	GO:0005783,endoplasmic reticulum; GO:0016021,integral component of membrane; GO:0005886,plasma membrane; GO:0010329,auxin efflux transmembrane transporter activity; GO:0010252,auxin homeostasis; GO:0009926,auxin polar transport; GO:0009734,auxin-activated signaling pathway	PF03547.18:Membrane transport protein
gene-LOC100191791	NC_050096.1	285652684	285654925	+	0.03	0	0.04	0.45	0.16	0.75	4.149	0.000812549	0.0276736	up	K13260 isoflavone/4'-methoxyisoflavone 2'-hydroxylase [EC:1.14.14.90 1.14.14.89] | (RefSeq) cytochrome P450 81E8-like (A)	uncharacterized protein LOC100191791 [Zea mays]	RecName: Full=Isoflavone 2'-hydroxylase; EC=1.14.13.89; AltName: Full=CYP GE-3; AltName: Full=Cytochrome P450 81E1; AltName: Full=Cytochrome P450 91A4;	SubName: Full=Uncharacterized protein {ECO:0000313|EMBL:ACF79004.1};	Cytochrome P450 CYP2 subfamily	GO:0016020,membrane; GO:0020037,heme binding; GO:0005506,iron ion binding; GO:0033773,isoflavone 2'-hydroxylase activity	PF00067.22:Cytochrome P450
gene-LOC100191824	NC_050096.1	186167642	186168564	-	6.84	13.57	14.61	41.65	29.16	39.68	1.522	2.54828e-05	0.00174789	up	K01426 amidase [EC:3.5.1.4] | (RefSeq) LOW QUALITY PROTEIN: uncharacterized protein LOC105643773 (A)	blue copper protein precursor [Zea mays]	RecName: Full=Uclacyanin 1 {ECO:0000303|PubMed:9761472}; Flags: Precursor;	SubName: Full=Cupredoxin superfamily protein {ECO:0000313|EMBL:ONM02530.1};	--	GO:0031225,anchored component of membrane; GO:0046658,anchored component of plasma membrane; GO:0009055,electron transfer activity; GO:0046872,metal ion binding	PF02298.17:Plastocyanin-like domain
gene-LOC100191842	NC_050104.1	120195497	120197238	-	0.98	1.12	1.11	0.06	0.32	0.3	-2.449	0.000136164	0.00682143	down	K16818 phospholipase A1 [EC:3.1.1.32] | (RefSeq) phospholipase A(1) DAD1, chloroplastic (A)	Triacylglycerol lipase like protein [Zea mays]	RecName: Full=Phospholipase A1-Ibeta2, chloroplastic; EC=3.1.1.-; Flags: Precursor;	SubName: Full=Triacylglycerol lipase like protein {ECO:0000313|EMBL:ACG38548.1};	Predicted lipase	GO:0009507,chloroplast; GO:0047714,galactolipase activity; GO:0008970,phospholipase A1 activity; GO:0004806,triglyceride lipase activity; GO:0016042,lipid catabolic process	PF01764.25:Lipase (class 3)
gene-LOC100191899	--	--	--	--	50.96	81.62	74.54	135.88	163	200.11	1.124	0.00124314	0.0371857	up	--
gene-LOC100191927	NC_050098.1	23887489	23891122	-	1.27	2.15	2.1	5.22	6.48	4.03	1.298	3.08841e-07	4.12957e-05	up	K20606 mitogen-activated protein kinase kinase kinase ANP1 [EC:2.7.11.25] | (RefSeq) receptor-like serine/threonine-protein kinase SD1-7 isoform X1 (A)	uncharacterized protein LOC100191927 [Zea mays]	RecName: Full=Cysteine-rich receptor-like protein kinase 41; Short=Cysteine-rich RLK41; EC=2.7.11.-; Flags: Precursor;	SubName: Full=Uncharacterized protein {ECO:0000313|EMBL:ACF78711.1};	--	GO:0016021,integral component of membrane; GO:0005886,plasma membrane; GO:0005524,ATP binding; GO:0004674,protein serine/threonine kinase activity; GO:0006468,protein phosphorylation	PF07714.17:Protein tyrosine kinase
gene-LOC100191940	NC_050102.1	15392064	15394026	-	4.69	5.9	5.68	15.51	15.86	29.4	1.776	0.000160155	0.0076932	up	K08900 mitochondrial chaperone BCS1 | (RefSeq) AAA-ATPase ASD, mitochondrial-like (A)	uncharacterized protein LOC100191940 isoform X1 [Zea mays]	RecName: Full=AAA-ATPase At3g28580; EC=3.6.1.3 {ECO:0000250|UniProtKB:Q9FLD5};	SubName: Full=AAA-ATPase ASD mitochondrial {ECO:0000313|EMBL:ONM52105.1};	AAA+-type ATPase	GO:0005783,endoplasmic reticulum; GO:0016021,integral component of membrane; GO:0005524,ATP binding; GO:0016887,ATPase activity; GO:0009737,response to abscisic acid; GO:0000304,response to singlet oxygen	PF14363.6:Domain associated at C-terminal with AAA
gene-LOC100191951	NC_050097.1	216095627	216101389	-	2.27	3.66	2.74	7.04	6.7	7.87	1.148	0.000304317	0.0128405	up	K08819 cyclin-dependent kinase 12/13 [EC:2.7.11.22 2.7.11.23] | (RefSeq) probable serine/threonine-protein kinase At1g54610 (A)	putative protein kinase superfamily protein isoform X2 [Zea mays]	RecName: Full=Protein IMPAIRED IN BABA-INDUCED STERILITY 1 {ECO:0000303|PubMed:15722464}; EC=2.7.11.- {ECO:0000255|PROSITE-ProRule:PRU00159};	SubName: Full=Uncharacterized protein {ECO:0000313|EMBL:ONM24966.1, ECO:0000313|EnsemblPlants:Zm00001d006759_P017};	Cdc2-related protein kinase	GO:0005634,nucleus; GO:0005886,plasma membrane; GO:0005524,ATP binding; GO:0004693,cyclin-dependent protein serine/threonine kinase activity; GO:0042742,defense response to bacterium; GO:0002229,defense response to oomycetes; GO:1900426,positive regulation of defense response to bacterium; GO:1902290,positive regulation of defense response to oomycetes; GO:0006468,protein phosphorylation; GO:2000…	PF00069.25:Protein kinase domain
gene-LOC100192038	NC_050099.1	243880412	243884544	+	0.67	0.64	0.46	2.45	1.58	2.4	1.656	0.000990104	0.0314001	up	K01792 glucose-6-phosphate 1-epimerase [EC:5.1.3.15] | (RefSeq) apospory-associated protein (A)	apospory-associated protein [Zea mays]	RecName: Full=Putative glucose-6-phosphate 1-epimerase {ECO:0000250|UniProtKB:Q03161}; EC=5.1.3.15 {ECO:0000250|UniProtKB:Q03161}; AltName: Full=Putative D-hexose-6-phosphate mutarotase {ECO:0000250|UniProtKB:Q03161}; AltName: Full=Putative apospory-associated protein C;	RecName: Full=Glucose-6-phosphate 1-epimerase {ECO:0000256|PIRNR:PIRNR016020}; EC=5.1.3.15 {ECO:0000256|PIRNR:PIRNR016020};	Uncharacterized enzymes related to aldose 1-epimerase	GO:0030246,carbohydrate binding; GO:0047938,glucose-6-phosphate 1-epimerase activity; GO:0005975,carbohydrate metabolic process	PF01263.20:Aldose 1-epimerase
gene-LOC100192073	NC_050096.1	39067327	39069306	-	1.85	4.13	2	9.54	12.55	15.2	2.089	5.36852e-06	0.000482741	up	K14497 protein phosphatase 2C [EC:3.1.3.16] | (RefSeq) probable protein phosphatase 2C 30 (A)	2C-type protein phosphatase protein isoform X1 [Zea mays]	RecName: Full=Probable protein phosphatase 2C 30; Short=OsPP2C30; EC=3.1.3.16;	SubName: Full=2C-type protein phosphatase protein {ECO:0000313|EMBL:AIG52099.1}; SubName: Full=Protein phosphatase 2C 37 {ECO:0000313|EMBL:ONL96464.1};	Serine/threonine protein phosphatase	GO:0046872,metal ion binding; GO:0004722,protein serine/threonine phosphatase activity	PF00481.21:Protein phosphatase 2C
gene-LOC100192110	NC_050096.1	217938373	217939792	+	7.44	19.25	13.11	42.58	33.31	34.69	1.321	0.000124265	0.00634098	up	K01166 ribonuclease T2 [EC:3.1.27.1] | (RefSeq) pco076023; uncharacterized protein LOC100192110 precursor (A)	uncharacterized protein LOC100192110 precursor [Zea mays]	RecName: Full=Ribonuclease 3; EC=3.1.27.1; Flags: Precursor;	SubName: Full=Ribonuclease 1 {ECO:0000313|EMBL:ONM04544.1}; SubName: Full=Ribonuclease 3 {ECO:0000313|EMBL:ACG37896.1};	Ribonuclease, T2 family	GO:0033897,ribonuclease T2 activity; GO:0003723,RNA binding	PF00445.18:Ribonuclease T2 family
gene-LOC100192350	NC_050096.1	44909165	44912606	-	54.89	76.42	36.47	377.17	291.97	580.57	2.742	1.50397e-07	2.26317e-05	up	K01953 asparagine synthase (glutamine-hydrolysing) [EC:6.3.5.4] | (RefSeq) asn3; asparagine synthetase 3 (A)	asparagine synthetase 3 [Zea mays]	RecName: Full=Asparagine synthetase [glutamine-hydrolyzing] 1; EC=6.3.5.4; AltName: Full=Glutamine-dependent asparagine synthetase 1;	SubName: Full=Asparagine synthetase {ECO:0000313|EMBL:CAR82080.1}; EC=6.3.5.4 {ECO:0000313|EMBL:CAR82080.1}; SubName: Full=Asparagine synthetase3 {ECO:0000313|EMBL:ONL96955.1};	Asparagine synthase (glutamine-hydrolyzing)	GO:0004066,asparagine synthase (glutamine-hydrolyzing) activity; GO:0005524,ATP binding; GO:0042803,protein homodimerization activity; GO:0006529,asparagine biosynthetic process; GO:0006541,glutamine metabolic process; GO:0070981,L-asparagine biosynthetic process; GO:0009646,response to absence of light	PF00733.21:Asparagine synthase
gene-LOC100192351	NC_050104.1	143805557	143809146	+	2.41	3.87	1.63	15.9	12.47	16.44	2.316	2.659e-07	3.66469e-05	up	K01953 asparagine synthase (glutamine-hydrolysing) [EC:6.3.5.4] | (RefSeq) asn4; asparagine synthetase 4 (A)	asparagine synthetase 4 isoform X1 [Zea mays]	RecName: Full=Asparagine synthetase [glutamine-hydrolyzing] 1; EC=6.3.5.4; AltName: Full=Glutamine-dependent asparagine synthetase 1;	SubName: Full=Uncharacterized protein {ECO:0000313|EMBL:ACF80774.1};	Asparagine synthase (glutamine-hydrolyzing)	GO:0004066,asparagine synthase (glutamine-hydrolyzing) activity; GO:0005524,ATP binding; GO:0042803,protein homodimerization activity; GO:0006529,asparagine biosynthetic process; GO:0006541,glutamine metabolic process; GO:0070981,L-asparagine biosynthetic process; GO:0009646,response to absence of light	PF00733.21:Asparagine synthase
gene-LOC100192467	NC_050104.1	142917381	142918359	+	8.11	6.15	7.2	2.71	2.98	3.44	-1.461	0.000405874	0.0161188	down	--	uncharacterized protein LOC100192467 [Zea mays]	RecName: Full=Senescence associated gene 20 {ECO:0000303|PubMed:10444084}; AltName: Full=Protein WOUND-INDUCED 12 {ECO:0000303|PubMed:12857840}; Short=AtWI-12 {ECO:0000303|PubMed:12857840};	SubName: Full=Senescence associated gene 20 {ECO:0000313|EMBL:AQL07312.1};	--	GO:0007568,aging; GO:0010150,leaf senescence; GO:0009620,response to fungus; GO:0002238,response to molecule of fungal origin; GO:0009624,response to nematode; GO:0010193,response to ozone	PF07107.11:Wound-induced protein WI12
gene-LOC100192520	NC_050096.1	220794734	220796961	+	6.34	3.19	2.32	22.08	21.41	33.76	2.435	8.42495e-05	0.00465328	up	K01099 inositol polyphosphate 5-phosphatase INPP5B/F [EC:3.1.3.36] | (RefSeq) type IV inositol polyphosphate 5-phosphatase 9-like isoform X1 (A)	putative inositol polyphosphate phosphatase (synaptogenin-like) family protein [Zea mays]	RecName: Full=Type IV inositol polyphosphate 5-phosphatase 9 {ECO:0000303|PubMed:23658066}; Short=At5PTase9 {ECO:0000303|PubMed:23658066}; EC=3.1.3.36 {ECO:0000269|PubMed:23658066}; EC=3.1.3.86 {ECO:0000269|PubMed:23658066};	SubName: Full=Type IV inositol polyphosphate 5-phosphatase 9 {ECO:0000313|EMBL:ONM04704.1};	Inositol polyphosphate 5-phosphatase and related proteins	GO:0034595,phosphatidylinositol phosphate 5-phosphatase activity; GO:0034485,phosphatidylinositol-3,4,5-trisphosphate 5-phosphatase activity; GO:0004439,phosphatidylinositol-4,5-bisphosphate 5-phosphatase activity; GO:0071472,cellular response to salt stress; GO:0046856,phosphatidylinositol dephosphorylation; GO:2000369,regulation of clathrin-dependent endocytosis; GO:2000377,regulation of reacti…	PF03372.23:Endonuclease/Exonuclease/phosphatase family
gene-LOC100192522	NC_050099.1	13184430	13185788	-	0.93	5.05	5.29	26.43	13.76	29.3	2.583	4.81489e-05	0.00294627	up	--	chitinase 1 [Zea mays]	RecName: Full=Chitinase 2; EC=3.2.1.14; AltName: Full=Tulip bulb chitinase-2; Short=TBC-2;	SubName: Full=Chitinase 1 {ECO:0000313|EMBL:ACG27799.1}; SubName: Full=Chitinase 2 {ECO:0000313|EMBL:AQK49442.1};	--	GO:0008061,chitin binding; GO:0004568,chitinase activity; GO:0006032,chitin catabolic process; GO:0000272,polysaccharide catabolic process	PF00704.28:Glycosyl hydrolases family 18
gene-LOC100192725	NC_050103.1	178210487	178213375	-	3.38	5.83	3.34	17.89	22.43	31.26	2.371	1.60552e-07	2.37956e-05	up	K17609 nucleoredoxin [EC:1.8.1.8] | (RefSeq) protein disulfide isomerase (A)	protein disulfide isomerase isoform X1 [Zea mays]	RecName: Full=Probable nucleoredoxin 2; Short=OsNrx2; EC=1.8.1.8;	SubName: Full=Putative nucleoredoxin 1 {ECO:0000313|EMBL:AQK99916.1};	Thioredoxin, nucleoredoxin and related proteins	GO:0005737,cytoplasm; GO:0047134,protein-disulfide reductase activity; GO:0004791,thioredoxin-disulfide reductase activity; GO:0045454,cell redox homeostasis	PF13905.6:Thioredoxin-like
gene-LOC100192761	NC_050098.1	148431635	148432973	-	11.82	13.7	22.55	57.39	43.9	38.45	1.339	6.64154e-06	0.000579543	up	K00430 peroxidase [EC:1.11.1.7] | (RefSeq) TIDP3705; uncharacterized protein LOC100192761 precursor (A)	Peroxidase 12 [Zea mays]	RecName: Full=Cationic peroxidase SPC4; EC=1.11.1.7; Flags: Precursor;	RecName: Full=Peroxidase {ECO:0000256|RuleBase:RU362060, ECO:0000256|SAAS:SAAS00709852}; EC=1.11.1.7 {ECO:0000256|RuleBase:RU362060, ECO:0000256|SAAS:SAAS00709852};	--	GO:0005576,extracellular region; GO:0009505,plant-type cell wall; GO:0009506,plasmodesma; GO:0020037,heme binding; GO:0046872,metal ion binding; GO:0004601,peroxidase activity; GO:0042744,hydrogen peroxide catabolic process; GO:0009664,plant-type cell wall organization; GO:0006979,response to oxidative stress	PF00141.23:Peroxidase
gene-LOC100192762	NC_050105.1	113823741	113832027	+	3.47	4.91	5.14	18.29	17.51	7.78	1.43	1.3041e-06	0.000140376	up	K17579 protein phosphatase 1 regulatory subunit 42 | (RefSeq) hypothetical protein (A)	protein MEI2-like 4 isoform X2 [Zea mays]	RecName: Full=Protein MEI2-like 4; Short=OML4; AltName: Full=MEI2-like protein 4;	SubName: Full=Protein MEI2-like 1 {ECO:0000313|EMBL:AQK43401.1};	Protein Mei2, essential for commitment to meiosis, and related proteins	GO:0003723,RNA binding	PF04059.12:RNA recognition motif 2
gene-LOC100192776	NC_050103.1	16439998	16441924	-	0.58	0.78	0.77	2.08	1.93	1.84	1.258	0.000284824	0.012228	up	--	uncharacterized protein LOC100192776 [Zea mays]	--	SubName: Full=DCD (Development and Cell Death) domain protein {ECO:0000313|EMBL:AQK90404.1};	--	--	--
gene-LOC100192830	NC_050103.1	92060623	92062756	+	20.15	36.09	36.06	21.25	18.65	12.68	-1.017	5.12646e-06	0.000466666	down	K20718 LRR receptor-like serine/threonine-protein kinase ERECTA [EC:2.7.11.1] | (RefSeq) LRR receptor-like serine/threonine-protein kinase ERL1 isoform X2 (A)	leucine-rich repeat (LRR) family protein precursor [Zea mays]	RecName: Full=Leucine-rich repeat extensin-like protein 4; Short=AtLRX4; Short=LRR/EXTENSIN4; AltName: Full=Cell wall hydroxyproline-rich glycoprotein; Flags: Precursor;	SubName: Full=Leucine-rich repeat extensin-like protein 3 {ECO:0000313|EMBL:AQK93160.1};	--	GO:0005618,cell wall; GO:0005576,extracellular region; GO:0009505,plant-type cell wall; GO:0009506,plasmodesma; GO:0005199,structural constituent of cell wall; GO:0071555,cell wall organization	PF13855.6:Leucine rich repeat
gene-LOC100192938	NC_050096.1	165030665	165032552	-	1.91	2.19	1.99	4.48	6.4	6.17	1.287	0.000618727	0.0224186	up	K22378 E3 ubiquitin-protein ligase RNF181 [EC:2.3.2.27] | (RefSeq) E3 ubiquitin-protein ligase RING1-like (A)	putative RING zinc finger domain superfamily protein [Zea mays]	RecName: Full=Probable E3 ubiquitin-protein ligase RHY1A {ECO:0000305}; EC=2.3.2.27; AltName: Full=RING-H2 finger Y1a {ECO:0000303|PubMed:9781696}; AltName: Full=RING-H2 zinc finger protein RHY1a {ECO:0000305}; AltName: Full=RING-type E3 ubiquitin transferase RHY1A {ECO:0000305};	SubName: Full=Putative E3 ubiquitin-protein ligase RHY1A {ECO:0000313|EMBL:ONM01599.1}; SubName: Full=Zinc finger, C3HC4 type family protein {ECO:0000313|EMBL:ACG40706.1};	FOG: Predicted E3 ubiquitin ligase	GO:0046872,metal ion binding; GO:0061630,ubiquitin protein ligase activity; GO:0043161,proteasome-mediated ubiquitin-dependent protein catabolic process	PF13639.6:Ring finger domain
gene-LOC100192940	NC_050098.1	65638805	65640400	-	1.22	0.97	0.92	6.08	5.3	10.29	2.628	1.35916e-06	0.000144198	up	--	uncharacterized protein LOC100192940 [Zea mays]	--	SubName: Full=Uncharacterized protein {ECO:0000313|EMBL:ACF80064.1, ECO:0000313|EnsemblPlants:Zm00001d040777_P001};	--	GO:0016021,integral component of membrane	--
gene-LOC100193097	NC_050099.1	38531720	38534008	-	16.6	12.3	13.52	44.43	39.77	70.65	1.677	0.000600064	0.0218498	up	K10446 kelch-like protein 8 | (RefSeq) hypothetical protein (A)	uncharacterized protein LOC100193097 [Zea mays]	RecName: Full=F-box/kelch-repeat protein At1g22040;	SubName: Full=F-box/kelch-repeat protein {ECO:0000313|EMBL:AQK50951.1};	FOG: Kelch repeat	--	PF01344.25:Kelch motif
gene-LOC100193175	NC_050098.1	65906061	65908380	+	2.2	2.33	1.86	10.99	11.52	20.3	2.587	1.82473e-07	2.66428e-05	up	--	hypothetical protein [Zea mays]	--	SubName: Full=Uncharacterized protein {ECO:0000313|EMBL:ONM32018.1, ECO:0000313|EnsemblPlants:Zm00001d040780_P002};	--	GO:0016021,integral component of membrane	--
gene-LOC100193302	NC_050100.1	216012836	216014339	-	0.12	0.2	0.1	0.6	0.88	1.06	2.418	0.000841102	0.028129	up	--	uncharacterized LOC100193302 precursor [Zea mays]	RecName: Full=Lectin;	SubName: Full=L-type lectin-domain containing receptor kinase IX.1 {ECO:0000313|EMBL:AQK74942.1};	--	GO:0005537,mannose binding	PF00139.19:Legume lectin domain
gene-LOC100193369	NC_050096.1	257319808	257323211	-	2.01	2.69	2.34	6.57	6.41	9.52	1.522	0.000468326	0.0181271	up	--	Pollen Ole e 1 allergen and extensin family protein [Zea mays]	--	SubName: Full=Pollen Ole e 1 allergen and extensin family protein {ECO:0000313|EMBL:ONM07031.1};	--	GO:0016021,integral component of membrane	PF01190.17:Pollen proteins Ole e I like
gene-LOC100193626	NC_050099.1	149981256	149986506	+	16.07	12.09	9.75	64.71	69.55	114.52	2.507	1.60452e-06	0.000167814	up	K01583 arginine decarboxylase [EC:4.1.1.19] | (RefSeq) AY110562; arginine decarboxylase isoform 2 (A)	arginine decarboxylase isoform 2 [Zea mays]	RecName: Full=Arginine decarboxylase 2; Short=ARGDC2; Short=OsADC2; EC=4.1.1.19;	RecName: Full=Arginine decarboxylase {ECO:0000256|RuleBase:RU003740}; EC=4.1.1.19 {ECO:0000256|RuleBase:RU003740};	--	GO:0008792,arginine decarboxylase activity; GO:0006527,arginine catabolic process; GO:0009446,putrescine biosynthetic process; GO:0008295,spermidine biosynthetic process	PF02784.16:Pyridoxal-dependent decarboxylase, pyridoxal binding domain
gene-LOC100193689	NC_050103.1	3737572	3742081	+	5.16	8.17	6.9	15.4	15.16	16.55	1.046	0.000222384	0.0100444	up	K01640 hydroxymethylglutaryl-CoA lyase [EC:4.1.3.4] | (RefSeq) hydroxymethylglutaryl-CoA lyase (A)	hydroxymethylglutaryl-CoA lyase [Zea mays]	RecName: Full=Hydroxymethylglutaryl-CoA lyase, mitochondrial; Short=HL; Short=HMG-CoA lyase; EC=4.1.3.4; AltName: Full=3-hydroxy-3-methylglutarate-CoA lyase;	SubName: Full=Hydroxymethylglutaryl-CoA lyase mitochondrial {ECO:0000313|EMBL:AQK89350.1};	Hydroxymethylglutaryl-CoA lyase	GO:0005759,mitochondrial matrix; GO:0005739,mitochondrion; GO:0004419,hydroxymethylglutaryl-CoA lyase activity; GO:0046872,metal ion binding; GO:0046951,ketone body biosynthetic process	PF00682.19:HMGL-like
gene-LOC100193712	NC_050099.1	247596046	247600038	+	6.13	6.14	7.96	64.54	89.26	150.42	3.781	4.37824e-14	3.22829e-11	up	K01703 3-isopropylmalate/(R)-2-methylmalate dehydratase large subunit [EC:4.2.1.33 4.2.1.35] | (RefSeq) PCO109372; uncharacterized protein LOC100193712 (A)	uncharacterized protein LOC100193712 isoform X2 [Zea mays]	RecName: Full=3-isopropylmalate dehydratase large subunit, chloroplastic; EC=4.2.1.33; AltName: Full=AtLEUC; AltName: Full=Isopropylmalate isomerase large subunit 1; Short=AtIIL1; Flags: Precursor;	SubName: Full=3-isopropylmalate dehydratase large subunit {ECO:0000313|EMBL:AQK60854.1};	3-isopropylmalate dehydratase (aconitase superfamily)	GO:0009507,chloroplast; GO:0009570,chloroplast stroma; GO:0009536,plastid; GO:0003861,3-isopropylmalate dehydratase activity; GO:0051539,4 iron, 4 sulfur cluster binding; GO:0050486,intramolecular transferase activity, transferring hydroxy groups; GO:0046872,metal ion binding; GO:0019761,glucosinolate biosynthetic process; GO:0009098,leucine biosynthetic process; GO:0046686,response to cadmium ion	PF00330.20:Aconitase family (aconitate hydratase)
gene-LOC100193733	NC_050097.1	26331662	26333111	-	0.04	0	0.1	0.63	0.45	1.11	3.851	0.000371974	0.0150082	up	K00430 peroxidase [EC:1.11.1.7] | (RefSeq) peroxidase 12 precursor (A)	peroxidase 12 precursor [Zea mays]	RecName: Full=Cationic peroxidase SPC4; EC=1.11.1.7; Flags: Precursor;	RecName: Full=Peroxidase {ECO:0000256|RuleBase:RU362060, ECO:0000256|SAAS:SAAS00709852}; EC=1.11.1.7 {ECO:0000256|RuleBase:RU362060, ECO:0000256|SAAS:SAAS00709852};	--	GO:0005576,extracellular region; GO:0009505,plant-type cell wall; GO:0009506,plasmodesma; GO:0020037,heme binding; GO:0046872,metal ion binding; GO:0004601,peroxidase activity; GO:0042744,hydrogen peroxide catabolic process; GO:0009664,plant-type cell wall organization; GO:0006979,response to oxidative stress	PF00141.23:Peroxidase
gene-LOC100193759	NC_050099.1	22923919	22924910	+	8.34	8.88	6.63	81.92	71.69	132.61	3.421	1.28879e-12	6.78778e-10	up	--	uncharacterized protein LOC100193759 [Zea mays]	--	SubName: Full=Uncharacterized protein {ECO:0000313|EMBL:ACF81115.1};	--	--	--
gene-LOC100193807	NC_050099.1	198372355	198375782	-	0.27	0.27	0.26	0.9	2.45	2.02	2.552	3.03955e-05	0.00201005	up	K07766 diphosphoinositol-polyphosphate diphosphatase [EC:3.6.1.52] | (RefSeq) nudix hydrolase 13 (A)	nudix hydrolase 13 isoform 1 [Zea mays]	RecName: Full=Nudix hydrolase 12, mitochondrial; Short=AtNUDT12; EC=3.6.1.-; Flags: Precursor;	SubName: Full=Nudix hydrolase 13 mitochondrial {ECO:0000313|EMBL:AQK57680.1};	Diadenosine and diphosphoinositol polyphosphate phosphohydrolase	GO:0005737,cytoplasm; GO:0005739,mitochondrion; GO:0005634,nucleus; GO:0016818,hydrolase activity, acting on acid anhydrides, in phosphorus-containing anhydrides; GO:0046872,metal ion binding	PF00293.28:NUDIX domain
gene-LOC100193820	NC_050096.1	269473842	269479931	-	6.13	6.62	10.07	22.91	17.67	21.36	1.26	0.000155137	0.00748873	up	--	uncharacterized protein LOC100193820 [Zea mays]	--	SubName: Full=Uncharacterized protein {ECO:0000313|EMBL:ONM07968.1, ECO:0000313|EnsemblPlants:Zm00001d033579_P001};	--	--	PF04398.12:Protein of unknown function, DUF538
gene-LOC100194041	NC_050105.1	143595601	143596943	-	0.04	0.13	0.15	0.94	0.97	1	2.954	4.12832e-05	0.00261851	up	--	uncharacterized protein LOC100194041 [Zea mays]	--	SubName: Full=Methionyl-tRNA synthetase {ECO:0000313|EMBL:AQK45936.1};	--	GO:0004812,aminoacyl-tRNA ligase activity	PF09723.10:Zinc ribbon domain
gene-LOC100194079	NC_050099.1	190935131	190938278	-	0.75	0.85	0.94	0.34	0.46	0.3	-1.447	0.00021789	0.00988684	down	K12501 homogentisate solanesyltransferase [EC:2.5.1.117] | (RefSeq) uncharacterized protein LOC110621370 isoform X1 (A)	uncharacterized LOC100194079 [Zea mays]	--	SubName: Full=TRAF-like superfamily protein {ECO:0000313|EMBL:AQK57115.1};	--	GO:0008270,zinc ion binding	PF02176.18:TRAF-type zinc finger
gene-LOC100194130	NC_050105.1	15897734	15900551	-	0	0.26	0.04	1.25	0.8	1.07	3.249	0.000548883	0.0204921	up	--	uncharacterized protein LOC100194130 [Zea mays]	--	SubName: Full=Uncharacterized protein {ECO:0000313|EMBL:ACF81587.1, ECO:0000313|EnsemblPlants:Zm00001d023700_P001};	--	--	--
gene-LOC100194142	NC_050096.1	257608611	257612318	+	0.48	0.86	0.17	11.21	7.51	14.41	4.298	5.56546e-11	2.05185e-08	up	K03294 basic amino acid/polyamine antiporter, APA family | (RefSeq) IDP630; uncharacterized protein LOC100194142 isoform X1 (A)	uncharacterized protein LOC100194142 [Zea mays]	RecName: Full=Cationic amino acid transporter 1; AltName: Full=Amino acid transporter 1;	SubName: Full=Cationic amino acid transporter 1 {ECO:0000313|EMBL:ONM07041.1};	Amino acid transporters	GO:0016021,integral component of membrane; GO:0016020,membrane; GO:0005886,plasma membrane; GO:0015171,amino acid transmembrane transporter activity	PF13520.6:Amino acid permease
gene-LOC100194234	NC_050104.1	152661488	152664950	-	3.77	5.14	6.2	19.18	23.95	25.47	2.02	3.63831e-10	1.06246e-07	up	K14399 polyribonucleotide 5'-hydroxyl-kinase [EC:2.7.1.78] | (RefSeq) Clp1-domain-containing protein (A)	CRAL/TRIO domain containing protein [Zea mays]	RecName: Full=Phosphatidylinositol/phosphatidylcholine transfer protein SFH2; AltName: Full=Protein SEC FOURTEEN HOMOLOGS 2; Short=AtSFH2;	SubName: Full=Sec14p-like phosphatidylinositol transfer family protein {ECO:0000313|EMBL:AQL08619.1};	Phosphatidylinositol transfer protein PDR16 and related proteins	GO:0000139,Golgi membrane; GO:0005886,plasma membrane; GO:0006656,phosphatidylcholine biosynthetic process; GO:0015031,protein transport	PF00650.20:CRAL/TRIO domain
gene-LOC100194241	NC_050101.1	177009501	177015923	-	6.85	9.12	7.59	25.39	22.9	32.26	1.607	7.47931e-06	0.000637693	up	K01937 CTP synthase [EC:6.3.4.2] | (RefSeq) umc1385; uncharacterized protein LOC100382896 (A)	CTP synthase family protein [Zea mays]	--	RecName: Full=CTP synthase {ECO:0000256|RuleBase:RU810713}; EC=6.3.4.2 {ECO:0000256|RuleBase:RU810713}; AltName: Full=UTP--ammonia ligase {ECO:0000256|RuleBase:RU810713};	CTP synthase (UTP-ammonia lyase)	GO:0005524,ATP binding; GO:0003883,CTP synthase activity; GO:0044210,'de novo' CTP biosynthetic process; GO:0006541,glutamine metabolic process	PF06418.14:CTP synthase N-terminus
gene-LOC100194340	NC_050097.1	35262122	35265965	+	2.73	5.26	5.79	2.63	3.27	1.81	-1.04	0.000365115	0.0147719	down	K05765 cofilin | (RefSeq) actin-depolymerizing factor 1-like (A)	putative HLH DNA-binding domain superfamily protein isoform X2 [Zea mays]	RecName: Full=Transcription factor bHLH153; AltName: Full=BHLH transcription factor alpha; Short=bHLH alpha {ECO:0000312|EMBL:CAE09167.1}; AltName: Full=Basic helix-loop-helix protein 153; Short=AtbHLH153 {ECO:0000303|PubMed:14600211}; Short=bHLH 153; AltName: Full=bHLH transcription factor bHLH153;	SubName: Full=Uncharacterized protein {ECO:0000313|EMBL:ACL54470.1};	--	GO:0005634,nucleus; GO:0003677,DNA binding; GO:0046983,protein dimerization activity; GO:0006355,regulation of transcription, DNA-templated; GO:0006351,transcription, DNA-templated	--
gene-LOC100194367	NC_050105.1	130128466	130131994	-	2.27	3.52	4.7	13.73	14.81	15.97	1.932	3.62144e-09	8.34458e-07	up	K00079 carbonyl reductase 1 [EC:1.1.1.184 1.1.1.189 1.1.1.197] | (RefSeq) NAD(P)-binding Rossmann-fold superfamily protein (A)	NAD(P)-binding Rossmann-fold superfamily protein isoform X1 [Zea mays]	RecName: Full=(+)-neomenthol dehydrogenase {ECO:0000303|PubMed:18599651}; EC=1.1.1.- {ECO:0000269|PubMed:21169366}; EC=1.1.1.208 {ECO:0000269|PubMed:18599651}; AltName: Full=Menthone:neomenthol reductase; AltName: Full=Short-chain dehydrogenase/reductase 1; Short=AtSDR1;	SubName: Full=NAD(P)-binding Rossmann-fold superfamily protein {ECO:0000313|EMBL:AQK44511.1};	Dehydrogenases with different specificities (related to short-chain alcohol dehydrogenases)	GO:0005737,cytoplasm; GO:0047501,(+)-neomenthol dehydrogenase activity; GO:0006952,defense response	PF00106.25:short chain dehydrogenase
gene-LOC100194394	NC_050096.1	154476590	154479510	-	25.47	18.07	12.59	2.48	4.26	3.02	-2.826	6.06577e-09	1.30587e-06	down	K09422 transcription factor MYB, plant | (RefSeq) pco132275a; uncharacterized protein LOC100194394 (A)	uncharacterized protein LOC100194394 [Zea mays]	RecName: Full=Myb-related protein MYBAS2;	SubName: Full=Transcription factor MYB48 {ECO:0000313|EMBL:ONM01373.1};	Transcription factor, Myb superfamily	GO:0005634,nucleus; GO:0000981,DNA-binding transcription factor activity, RNA polymerase II-specific; GO:0043565,sequence-specific DNA binding; GO:0001135,RNA polymerase II transcription regulator recruiting activity; GO:0044212,transcription regulatory region DNA binding; GO:0030154,cell differentiation; GO:0006357,regulation of transcription by RNA polymerase II; GO:0006351,transcription, DNA-t…	PF00249.31:Myb-like DNA-binding domain
gene-LOC100196928	NC_050105.1	95653294	95655928	+	0.04	0.22	0.3	1.73	0.48	1.63	2.691	0.000605874	0.0219799	up	K04079 molecular chaperone HtpG | (RefSeq) hsp82; heat shock protein 82 (A)	heat shock protein 82 [Zea mays]	RecName: Full=Heat shock protein 82;	SubName: Full=Heat shock protein 90 kDa {ECO:0000313|EMBL:AQK42298.1};	Molecular chaperone (HSP90 family)	GO:0005737,cytoplasm; GO:0005524,ATP binding; GO:0051082,unfolded protein binding; GO:0006457,protein folding; GO:0006950,response to stress	PF00183.18:Hsp90 protein
gene-LOC100216587	NC_050101.1	165081878	165083275	+	3.59	1.84	2.64	1.02	1.15	1.04	-1.61	0.00128552	0.0380674	down	K01870 isoleucyl-tRNA synthetase [EC:6.1.1.5] | (RefSeq) hypothetical protein (A)	OFP transcription factor [Zea mays]	RecName: Full=Transcription repressor OFP4; AltName: Full=Ovate family protein 4; Short=AtOFP4;	SubName: Full=OFP transcription factor {ECO:0000313|EMBL:AIB05284.1}; SubName: Full=Transcription repressor OFP1 {ECO:0000313|EMBL:AQK86700.1};	--	GO:0005634,nucleus; GO:0003677,DNA binding; GO:0045892,negative regulation of transcription, DNA-templated; GO:2000652,regulation of secondary cell wall biogenesis; GO:0006351,transcription, DNA-templated	PF04844.13:Transcriptional repressor, ovate
gene-LOC100216650	NC_050100.1	216542437	216546678	+	2.49	3.94	4.49	2.27	1.9	1.29	-1.21	1.21278e-05	0.000943791	down	--	uncharacterized protein LOC100216650 [Zea mays]	--	SubName: Full=Uncharacterized protein {ECO:0000313|EMBL:ACF82111.1, ECO:0000313|EnsemblPlants:Zm00001d018087_P001};	--	--	--
gene-LOC100216664	NC_050102.1	178292564	178294712	-	0.07	0.04	0.03	0.52	0.54	0.26	3.038	0.00152642	0.0432527	up	K22418 11beta/17beta-hydroxysteroid dehydrogenase [EC:1.1.1.146 1.1.1.-] | (RefSeq) corticosteroid 11-beta-dehydrogenase isozyme 1 (A)	corticosteroid 11-beta-dehydrogenase isozyme 1 [Zea mays]	RecName: Full=11-beta-hydroxysteroid dehydrogenase 1B; EC=1.1.1.146; AltName: Full=17-beta-hydroxysteroid dehydrogenase 1B; EC=1.1.1.-; AltName: Full=Hydroxysteroid dehydrogenase 1; Short=AtHSD1;	SubName: Full=11-beta-hydroxysteroid dehydrogenase 1A {ECO:0000313|EMBL:ONM60062.1}; SubName: Full=Corticosteroid 11-beta-dehydrogenase isozyme 1 {ECO:0000313|EMBL:ACG48671.1};	Predicted dehydrogenase	GO:0016021,integral component of membrane; GO:0005811,lipid droplet; GO:0070524,11-beta-hydroxysteroid dehydrogenase (NADP+) activity; GO:0006694,steroid biosynthetic process	PF00106.25:short chain dehydrogenase
gene-LOC100216682	NC_050096.1	100183040	100184988	+	3.59	6.3	6.22	11.24	11.98	15.16	1.115	0.00175679	0.0474061	up	--	hypothetical protein [Zea mays]	RecName: Full=Uncharacterized protein At3g50808;	SubName: Full=PLATZ transcription factor {ECO:0000313|EMBL:AIB05134.1}; SubName: Full=PLATZ transcription factor family protein {ECO:0000313|EMBL:ONM00064.1};	--	--	PF04640.14:PLATZ transcription factor
gene-LOC100217021	NC_050101.1	175623239	175625972	-	3.12	4.05	4.6	9.1	10.67	10.21	1.164	1.7771e-05	0.00130383	up	K00924 kinase [EC:2.7.1.-] | (RefSeq) receptor-like protein kinase HSL1 (A)	putative leucine-rich repeat transmembrane protein kinase family protein precursor [Zea mays]	RecName: Full=Protein MALE DISCOVERER 2; Short=AtMDIS2; AltName: Full=Probable LRR receptor-like serine/threonine-protein kinase MRH1 {ECO:0000303|PubMed:16367956}; EC=2.7.11.1 {ECO:0000305}; AltName: Full=Protein MORPHOGENESIS OF ROOT HAIR 1 {ECO:0000303|PubMed:16367956}; Flags: Precursor;	SubName: Full=Protein MALE DISCOVERER 2 {ECO:0000313|EMBL:AQK88420.1};	--	GO:0012505,endomembrane system; GO:0016021,integral component of membrane; GO:0005886,plasma membrane; GO:0090406,pollen tube; GO:0005524,ATP binding; GO:0004675,transmembrane receptor protein serine/threonine kinase activity; GO:0007166,cell surface receptor signaling pathway; GO:0006468,protein phosphorylation; GO:0048765,root hair cell differentiation	PF07714.17:Protein tyrosine kinase
gene-LOC100217085	NC_050097.1	41038874	41043321	-	4.18	4.44	4.26	2.17	3.2	1.61	-1.15	0.0001997	0.0091863	down	K12639 cytochrome P450 family 724 subfamily B polypeptide 1 [EC:1.14.13.-] | (RefSeq) uncharacterized protein LOC100217085 (A)	uncharacterized protein LOC100217085 [Zea mays]	RecName: Full=Cytochrome P450 724B1; EC=1.14.-.-; AltName: Full=Dwarf protein 11; AltName: Full=OsDWARF11;	SubName: Full=Uncharacterized protein {ECO:0000313|EMBL:ACF82911.1};	Cytochrome P450 CYP4/CYP19/CYP26 subfamilies	GO:0005623,cell; GO:0016021,integral component of membrane; GO:0008199,ferric iron binding; GO:0020037,heme binding; GO:0004497,monooxygenase activity; GO:0016705,oxidoreductase activity, acting on paired donors, with incorporation or reduction of molecular oxygen; GO:0016132,brassinosteroid biosynthetic process; GO:0010268,brassinosteroid homeostasis; GO:0006879,cellular iron ion homeostasis; GO…	PF00067.22:Cytochrome P450
gene-LOC100217093	NC_050103.1	124119503	124156497	+	0.03	0.11	0.14	0.97	0.11	1.13	2.971	0.00157496	0.0443243	up	K08741 DNA mismatch repair protein MSH5 | (RefSeq) DNA mismatch repair protein MSH5 isoform X1 (A)	uncharacterized protein LOC100217093 isoform X1 [Zea mays]	RecName: Full=DNA mismatch repair protein MSH5 {ECO:0000305}; Short=OsMSH5 {ECO:0000303|PubMed:23220939}; AltName: Full=MutS protein homolog 5 {ECO:0000305};	SubName: Full=Uncharacterized protein {ECO:0000313|EMBL:OQU78247.1};	Mismatch repair ATPase MSH5 (MutS family)	GO:0043073,germ cell nucleus; GO:0000795,synaptonemal complex; GO:0005524,ATP binding; GO:0008094,DNA-dependent ATPase activity; GO:0030983,mismatched DNA binding; GO:0051026,chiasma assembly; GO:0045143,homologous chromosome segregation; GO:0010777,meiotic mismatch repair involved in reciprocal meiotic recombination; GO:0006298,mismatch repair; GO:0007131,reciprocal meiotic recombination; GO:000…	PF00488.21:MutS domain V
gene-LOC100217165	NC_050104.1	159154636	159156888	+	0.63	0.42	0.28	1.55	1.85	4.24	2.348	0.00102315	0.0322324	up	K09838 zeaxanthin epoxidase [EC:1.14.15.21] | (RefSeq) Zep1-1; zeaxanthin epoxidase (A)	uncharacterized protein LOC100217165 isoform X1 [Zea mays]	RecName: Full=Monooxygenase 3 {ECO:0000303|PubMed:10216258}; Short=AtMO3 {ECO:0000303|PubMed:10216258}; EC=1.14.13.-;	SubName: Full=FAD/NAD(P)-binding oxidoreductase family protein {ECO:0000313|EMBL:AQL09642.1};	Kynurenine 3-monooxygenase and related flavoprotein monooxygenases	GO:0071949,FAD binding; GO:0004497,monooxygenase activity; GO:0044550,secondary metabolite biosynthetic process	PF01494.19:FAD binding domain
gene-LOC100217252	NC_050099.1	161507357	161508530	-	5.26	6.84	4.87	2.56	2.35	3.18	-1.255	0.00135289	0.0393901	down	K16281 RING-H2 zinc finger protein RHA1 | (RefSeq) RING-H2 zinc finger protein RHA1a-like (A)	uncharacterized protein LOC100217252 [Zea mays]	RecName: Full=Probable E3 ubiquitin-protein ligase RHA1A {ECO:0000305}; EC=2.3.2.27; AltName: Full=RING-H2 finger A1a {ECO:0000303|PubMed:9781696}; AltName: Full=RING-H2 zinc finger protein RHA1a {ECO:0000305}; AltName: Full=RING-type E3 ubiquitin transferase RHA1A {ECO:0000305};	SubName: Full=RING/U-box superfamily protein {ECO:0000313|EMBL:AQK54291.1};	FOG: Predicted E3 ubiquitin ligase	GO:0046872,metal ion binding; GO:0061630,ubiquitin protein ligase activity; GO:0043161,proteasome-mediated ubiquitin-dependent protein catabolic process	PF13639.6:Ring finger domain
gene-LOC100217274	NC_050096.1	225700352	225703593	-	3.08	3.32	3.99	13.26	12.2	22.48	2.07	9.26087e-06	0.000753673	up	K06911 uncharacterized protein | (RefSeq) uncharacterized protein LOC100217274 (A)	uncharacterized protein LOC100217274 [Zea mays]	RecName: Full=Pirin-like protein;	SubName: Full=Pirin-like protein 2 {ECO:0000313|EMBL:ONM04932.1};	--	GO:0005634,nucleus	PF05726.13:Pirin C-terminal cupin domain
gene-LOC100217289	--	--	--	--	0.29	1.47	0.25	0	0	0	-6.226	0.000161539	0.00774704	down	--
gene-LOC100240688	NC_050098.1	105503017	105507748	-	44.99	54.2	59.76	29.31	29.52	21.96	-1.202	2.61888e-13	1.64343e-10	down	K15378 solute carrier family 45, member 1/2/4 | (RefSeq) sut4; sucrose transporter 4 (A)	sucrose transporter4 [Zea mays]	RecName: Full=Sucrose transport protein SUT2; AltName: Full=SUC4-like protein; AltName: Full=Sucrose permease 2; AltName: Full=Sucrose transporter 2; Short=OsSUT2; AltName: Full=Sucrose-proton symporter 2;	SubName: Full=Sucrose transporter4 {ECO:0000313|EMBL:ONM32661.1};	Sucrose transporter and related proteins	GO:0005801,cis-Golgi network; GO:0005887,integral component of plasma membrane; GO:0009705,plant-type vacuole membrane; GO:0008515,sucrose transmembrane transporter activity; GO:0015293,symporter activity; GO:0005985,sucrose metabolic process	PF07690.16:Major Facilitator Superfamily
gene-LOC100272379	NC_050098.1	153834754	153940325	+	3.85	5.46	3	20.66	24.96	17.76	2.128	8.45589e-11	2.93409e-08	up	K19891 glucan endo-1,3-beta-glucosidase 1/2/3 [EC:3.2.1.39] | (RefSeq) O-Glycosyl hydrolases family 17 protein (A)	uncharacterized protein LOC100272379 precursor [Zea mays]	RecName: Full=Glucan endo-1,3-beta-glucosidase GII; EC=3.2.1.39 {ECO:0000269|PubMed:8514770}; AltName: Full=(1->3)-beta-glucan endohydrolase GII; AltName: Full=(1->3)-beta-glucanase isoenzyme GII; AltName: Full=Beta-1,3-endoglucanase GII; Flags: Precursor;	SubName: Full=Beta-1,3-glucanase {ECO:0000313|EMBL:ADL60383.1}; EC=3.2.1.58 {ECO:0000313|EMBL:ADL60383.1}; Flags: Precursor;	--	GO:0042973,glucan endo-1,3-beta-D-glucosidase activity; GO:0006076,(1->3)-beta-D-glucan catabolic process; GO:0050832,defense response to fungus	PF00332.18:Glycosyl hydrolases family 17
gene-LOC100272413	NC_050102.1	89898278	89901284	-	3.75	3.84	2.2	11.31	13.43	21.07	2.04	0.000100438	0.00534714	up	K13434 pathogenesis-related genes transcriptional activator PTI6 | (RefSeq) pathogenesis-related genes transcriptional activator PTI6-like (A)	putative AP2/EREBP transcription factor superfamily protein [Zea mays]	RecName: Full=Ethylene-responsive transcription factor ERF118;	SubName: Full=AP2-EREBP transcription factor {ECO:0000313|EMBL:AIB05043.1}; SubName: Full=Ethylene-responsive transcription factor ERF117 {ECO:0000313|EMBL:ONM54157.1};	--	GO:0005634,nucleus; GO:0003677,DNA binding; GO:0003700,DNA-binding transcription factor activity; GO:0009873,ethylene-activated signaling pathway; GO:0006351,transcription, DNA-templated	PF00847.20:AP2 domain
gene-LOC100272496	NC_050096.1	77982591	77985835	+	3.96	17.03	43.11	4.83	5.97	1.98	-2.487	0.000565735	0.0209358	down	K00430 peroxidase [EC:1.11.1.7] | (RefSeq) peroxidase 70 (A)	uncharacterized protein LOC100272496 isoform X1 [Zea mays]	RecName: Full=Peroxidase 70; EC=1.11.1.7; AltName: Full=Plasma membrane-bound peroxidase 2b; Short=pmPOX2b; Flags: Precursor;	RecName: Full=Peroxidase {ECO:0000256|RuleBase:RU362060, ECO:0000256|SAAS:SAAS00709852}; EC=1.11.1.7 {ECO:0000256|RuleBase:RU362060, ECO:0000256|SAAS:SAAS00709852};	--	GO:0005576,extracellular region; GO:0020037,heme binding; GO:0046872,metal ion binding; GO:0004601,peroxidase activity; GO:0042744,hydrogen peroxide catabolic process; GO:0006979,response to oxidative stress	PF00141.23:Peroxidase
gene-LOC100272536	NC_050103.1	11690945	11721668	+	1.88	1.39	1.04	5.49	4.93	4.45	1.514	0.000471852	0.0182157	up	K01809 mannose-6-phosphate isomerase [EC:5.3.1.8] | (RefSeq) uncharacterized protein LOC100272536 (A)	uncharacterized protein LOC100272536 [Zea mays]	RecName: Full=Mannose-6-phosphate isomerase 1; EC=5.3.1.8; AltName: Full=Phosphohexomutase 1; AltName: Full=Phosphomannose isomerase 1; Short=PMI1; AltName: Full=Protein MATERNAL EFFECT EMBRYO ARREST 31;	RecName: Full=Mannose-6-phosphate isomerase {ECO:0000256|RuleBase:RU000611}; EC=5.3.1.8 {ECO:0000256|RuleBase:RU000611};	Mannose-6-phosphate isomerase	GO:0005737,cytoplasm; GO:0004476,mannose-6-phosphate isomerase activity; GO:0008270,zinc ion binding; GO:0005975,carbohydrate metabolic process; GO:0000032,cell wall mannoprotein biosynthetic process; GO:0009793,embryo development ending in seed dormancy; GO:0009298,GDP-mannose biosynthetic process; GO:0006486,protein glycosylation; GO:0046686,response to cadmium ion; GO:0032025,response to cobal…	PF01238.21:Phosphomannose isomerase type I
gene-LOC100272659	NC_050101.1	15262061	15263967	+	0	0.24	0.44	2.31	2.59	3.01	3.453	6.63935e-06	0.000579543	up	--	uncharacterized LOC100272659 [Zea mays]	RecName: Full=Ureide permease 4 {ECO:0000303|PubMed:11971139}; Short=AtUPS4 {ECO:0000303|PubMed:11971139};	SubName: Full=Uncharacterized protein {ECO:0000313|EMBL:ACF84133.1};	--	GO:0009507,chloroplast; GO:0016021,integral component of membrane; GO:0005524,ATP binding; GO:0022857,transmembrane transporter activity; GO:0071705,nitrogen compound transport	PF07168.11:Ureide permease
gene-LOC100272660	NC_050098.1	128792069	128793670	+	21.49	13.19	8.5	2.46	2.93	3.2	-2.619	2.62082e-06	0.000259391	down	K09422 transcription factor MYB, plant | (RefSeq) MYB transcription factor (A)	MYB transcription factor isoform X2 [Zea mays]	RecName: Full=Myb-related protein MYBAS2;	SubName: Full=Transcription factor MYB48 {ECO:0000313|EMBL:ONM33278.1};	Transcription factor, Myb superfamily	GO:0005634,nucleus; GO:0000981,DNA-binding transcription factor activity, RNA polymerase II-specific; GO:0043565,sequence-specific DNA binding; GO:0001135,RNA polymerase II transcription regulator recruiting activity; GO:0044212,transcription regulatory region DNA binding; GO:0030154,cell differentiation; GO:0006357,regulation of transcription by RNA polymerase II; GO:0006351,transcription, DNA-t…	PF00249.31:Myb-like DNA-binding domain
gene-LOC100272682	NC_050098.1	195630248	195648999	-	0.37	0.82	0.57	1.89	1.92	1.07	1.254	0.00014925	0.00726022	up	K20606 mitogen-activated protein kinase kinase kinase ANP1 [EC:2.7.11.25] | (RefSeq) receptor-like serine/threonine-protein kinase SD1-7 isoform X1 (A)	uncharacterized protein LOC100272682 [Zea mays]	RecName: Full=G-type lectin S-receptor-like serine/threonine-protein kinase B120; EC=2.7.11.1; Flags: Precursor;	SubName: Full=Uncharacterized protein {ECO:0000313|EMBL:ACF84170.1};	--	GO:0016021,integral component of membrane; GO:0005886,plasma membrane; GO:0005524,ATP binding; GO:0005516,calmodulin binding; GO:0030246,carbohydrate binding; GO:0004674,protein serine/threonine kinase activity; GO:0006468,protein phosphorylation; GO:0048544,recognition of pollen	PF07714.17:Protein tyrosine kinase
gene-LOC100272795	NC_050101.1	150693635	150696106	-	0.09	0.27	0.1	0.61	0.65	1.23	2.341	0.00177362	0.0477292	up	K03327 multidrug resistance protein, MATE family | (RefSeq) uncharacterized protein LOC100272795 (A)	uncharacterized protein LOC100272795 isoform X1 [Zea mays]	RecName: Full=Protein DETOXIFICATION 16 {ECO:0000303|PubMed:11739388}; Short=AtDTX16 {ECO:0000303|PubMed:11739388}; AltName: Full=Multidrug and toxic compound extrusion protein 16 {ECO:0000305}; Short=MATE protein 16 {ECO:0000305};	RecName: Full=Protein DETOXIFICATION {ECO:0000256|RuleBase:RU004914}; AltName: Full=Multidrug and toxic compound extrusion protein {ECO:0000256|RuleBase:RU004914};	Uncharacterized membrane protein, predicted efflux pump	GO:0016021,integral component of membrane; GO:0005774,vacuolar membrane; GO:0015297,antiporter activity; GO:0015238,drug transmembrane transporter activity; GO:0006855,drug transmembrane transport; GO:0009624,response to nematode	PF01554.18:MatE
gene-LOC100272814	NC_050096.1	259782592	259784843	-	0.5	1.16	1.06	3.16	2.3	3.16	1.523	0.000244679	0.0108357	up	K18823 soyasaponin III rhamnosyltransferase [EC:2.4.1.273] | (RefSeq) soyasaponin III rhamnosyltransferase-like (A)	uncharacterized protein LOC100272814 [Zea mays]	RecName: Full=Putative UDP-rhamnose:rhamnosyltransferase 1; Short=FaRT1 {ECO:0000303|PubMed:16443693}; EC=2.4.1.- {ECO:0000250|UniProtKB:Q940V3}; AltName: Full=Glycosyltransferase 4; Short=FaGT4 {ECO:0000312|EMBL:AAU09445.1};	RecName: Full=Glycosyltransferase {ECO:0000256|RuleBase:RU362057}; EC=2.4.1.- {ECO:0000256|RuleBase:RU362057};	UDP-glucuronosyl and UDP-glucosyl transferase	GO:0016021,integral component of membrane; GO:0016758,transferase activity, transferring hexosyl groups; GO:0008152,metabolic process	PF00201.18:UDP-glucoronosyl and UDP-glucosyl transferase
gene-LOC100272820	NC_050103.1	53225830	53226713	-	0.06	0.06	0.37	3.23	1.31	1.41	3.342	7.52407e-05	0.0042594	up	K13449 pathogenesis-related protein 1 | (RefSeq) TIDP2793; pathogenesis-related protein PRMS precursor (A)	pathogenesis-related protein PRMS precursor [Zea mays]	RecName: Full=Pathogenesis-related protein PRMS; Flags: Precursor;	SubName: Full=Pathogenesis-related protein PRMS {ECO:0000313|EMBL:AQK91634.1};	Defense-related protein containing SCP domain	GO:0005576,extracellular region; GO:0006952,defense response; GO:0009607,response to biotic stimulus	PF00188.26:Cysteine-rich secretory protein family
gene-LOC100272880	NC_050097.1	238221485	238222768	-	43.83	45.04	44.09	154.67	113.43	132.98	1.376	1.00396e-05	0.000802458	up	K22683 aspartyl protease family protein [EC:3.4.23.-] | (RefSeq) hypothetical protein (A)	uncharacterized protein LOC100272880 precursor [Zea mays]	RecName: Full=Basic 7S globulin; AltName: Full=SBg7S; Short=Bg; Contains: RecName: Full=Basic 7S globulin high kDa subunit; Contains: RecName: Full=Basic 7S globulin low kDa subunit; Flags: Precursor;	SubName: Full=Eukaryotic aspartyl protease family protein {ECO:0000313|EMBL:ONM27497.1};	Aspartyl protease	GO:0004190,aspartic-type endopeptidase activity; GO:0042802,identical protein binding; GO:0045735,nutrient reservoir activity; GO:0030163,protein catabolic process; GO:0006508,proteolysis	PF14541.6:Xylanase inhibitor C-terminal
gene-LOC100272885	NC_050101.1	170165189	170166596	-	5.86	8.26	12.64	5.76	5.72	3.74	-1.019	0.000512262	0.0194199	down	K16040 trans-resveratrol di-O-methyltransferase [EC:2.1.1.240] | (RefSeq) trans-resveratrol di-O-methyltransferase (A)	uncharacterized protein LOC100272885 [Zea mays]	RecName: Full=O-methyltransferase ZRP4; Short=OMT; EC=2.1.1.-;	SubName: Full=O-methyltransferase ZRP4 {ECO:0000313|EMBL:AQK87596.1};	Hydroxyindole-O-methyltransferase and related SAM-dependent methyltransferases	GO:0008171,O-methyltransferase activity; GO:0046983,protein dimerization activity	PF00891.18:O-methyltransferase domain
gene-LOC100272933	NC_050101.1	134533295	134534385	-	431.28	663.45	793.78	465.59	220.28	251.13	-1.201	0.00105377	0.0328539	down	--	germin-like protein precursor [Zea mays]	RecName: Full=Germin-like protein 8-14; AltName: Full=Germin-like protein 1; AltName: Full=Germin-like protein 5; Short=OsGER5; Flags: Precursor;	SubName: Full=Germin-like protein {ECO:0000313|EMBL:AAQ95582.1}; SubName: Full=Germin-like protein1 {ECO:0000313|EMBL:AQK84170.1};	--	GO:0048046,apoplast; GO:0005618,cell wall; GO:0031012,extracellular matrix; GO:0030145,manganese ion binding; GO:0045735,nutrient reservoir activity	PF00190.22:Cupin
gene-LOC100272937	NC_050098.1	109878232	109882064	-	0.68	0.24	0.3	1.78	2.26	3.92	2.471	0.000527062	0.0198787	up	--	uncharacterized protein LOC100272937 [Zea mays]	--	SubName: Full=Uncharacterized protein {ECO:0000313|EMBL:ACF84833.1};	--	--	--
gene-LOC100272945	NC_050105.1	150630324	150631421	-	4.52	2	1.55	0.57	1.24	0.48	-2.208	0.00180607	0.0482065	down	K20043 clathrin coat assembly protein AP180 | (RefSeq) putative clathrin assembly protein At5g35200 (A)	Dof zinc finger protein DOF1.6 [Zea mays]	RecName: Full=Dof zinc finger protein DOF5.8; Short=AtDOF5.8;	SubName: Full=DOF41 transcription factor {ECO:0000313|EMBL:AFT82634.1}; Flags: Fragment;	--	GO:0005634,nucleus; GO:0003700,DNA-binding transcription factor activity; GO:0046872,metal ion binding; GO:0000976,transcription regulatory region sequence-specific DNA binding; GO:0006355,regulation of transcription, DNA-templated; GO:0006351,transcription, DNA-templated	PF02701.15:Dof domain, zinc finger
gene-LOC100272977	NC_050104.1	19638379	19642006	+	0.12	1.05	0.32	5.09	2.26	3.04	2.683	0.000154087	0.00745025	up	K14566 U3 small nucleolar RNA-associated protein 24 | (RefSeq) pco138572; uncharacterized protein LOC100272977 (A)	uncharacterized protein LOC100272977 [Zea mays]	--	SubName: Full=Nucleolar protein involved in pre-mRNA processing {ECO:0000313|EMBL:ACG32261.1};	Predicted nucleic-acid-binding protein, contains PIN domain	GO:0032040,small-subunit processome	PF04900.12:Fcf1
gene-LOC100273000	NC_050099.1	21683755	21685236	-	0	0.12	0	0.92	0.29	0.83	4.027	0.0014783	0.0420909	up	K16292 KDEL-tailed cysteine endopeptidase [EC:3.4.22.-] | (RefSeq) senescence-specific cysteine protease SAG39 (A)	uncharacterized protein LOC100273000 [Zea mays]	RecName: Full=Senescence-specific cysteine protease SAG39 {ECO:0000305}; EC=3.4.22.- {ECO:0000305}; AltName: Full=Cysteine proteinase SAG39 {ECO:0000305}; AltName: Full=Protein SENESCENCE-ASSOCIATED GENE 39 {ECO:0000303|PubMed:20439547}; Flags: Precursor;	SubName: Full=Senescence-specific cysteine protease SAG12 {ECO:0000313|EMBL:AQK49888.1};	Cysteine proteinase Cathepsin L	GO:0005615,extracellular space; GO:0005764,lysosome; GO:0010282,senescence-associated vacuole; GO:0004197,cysteine-type endopeptidase activity; GO:0007568,aging; GO:0010150,leaf senescence; GO:0010623,programmed cell death involved in cell development; GO:0051603,proteolysis involved in cellular protein catabolic process; GO:0009737,response to abscisic acid; GO:0009723,response to ethylene; GO:0…	PF00112.23:Papain family cysteine protease
gene-LOC100273029	NC_050102.1	109894733	109896730	-	0.83	1.46	0.74	6.81	3.66	6.56	2.33	3.20662e-06	0.000308065	up	K01176 alpha-amylase [EC:3.2.1.1] | (RefSeq) LOW QUALITY PROTEIN: alpha-amylase type A isozyme (A)	uncharacterized protein LOC100273029 precursor [Zea mays]	RecName: Full=Alpha-amylase type A isozyme; EC=3.2.1.1 {ECO:0000269|PubMed:16030022, ECO:0000269|PubMed:18588886, ECO:0000269|PubMed:24089528, ECO:0000269|PubMed:7901200}; AltName: Full=1,4-alpha-D-glucan glucanohydrolase; AltName: Full=HvAMY1; AltName: Full=Low pI alpha-amylase; Flags: Precursor;	RecName: Full=Alpha-amylase {ECO:0000256|PIRNR:PIRNR001028}; EC=3.2.1.1 {ECO:0000256|PIRNR:PIRNR001028}; AltName: Full=1,4-alpha-D-glucan glucanohydrolase {ECO:0000256|PIRNR:PIRNR001028};	Alpha-amylase	GO:0005615,extracellular space; GO:0004556,alpha-amylase activity; GO:0103025,alpha-amylase activity (releasing maltohexaose); GO:0005509,calcium ion binding; GO:0005975,carbohydrate metabolic process	PF07821.12:Alpha-amylase C-terminal beta-sheet domain
gene-LOC100273162	NC_050099.1	190338881	190340598	-	0.73	0.64	0.97	3.23	4.82	5.73	2.385	4.97585e-07	6.21555e-05	up	K03239 translation initiation factor eIF-2B subunit alpha | (RefSeq) methylthioribose-1-phosphate isomerase (A)	uncharacterized protein LOC100273162 [Zea mays]	RecName: Full=Protein LURP-one-related 8;	SubName: Full=Protein LURP-one-related 8 {ECO:0000313|EMBL:AQK57066.1};	--	--	PF04525.12:LURP-one-related
gene-LOC100273190	NC_050098.1	95886729	95888667	+	134.16	75.59	58.68	16.15	16.04	33.9	-2.243	0.000476294	0.0183153	down	K15382 solute carrier family 50 (sugar transporter) | (RefSeq) uncharacterized protein LOC100273190 (A)	uncharacterized protein LOC100273190 [Zea mays]	RecName: Full=Bidirectional sugar transporter SWEET13; Short=OsSWEET13;	RecName: Full=Bidirectional sugar transporter SWEET {ECO:0000256|RuleBase:RU910715};	Multitransmembrane protein	GO:0016021,integral component of membrane; GO:0005887,integral component of plasma membrane; GO:0051119,sugar transmembrane transporter activity; GO:0008643,carbohydrate transport	PF03083.16:Sugar efflux transporter for intercellular exchange
gene-LOC100273195	NC_050097.1	210554756	210556341	-	0.14	0.32	0.21	1.16	0.89	1.47	2.271	0.000186752	0.00874294	up	K01381 saccharopepsin [EC:3.4.23.25] | (RefSeq) aspartic proteinase CDR1-like (A)	uncharacterized protein LOC100273195 precursor [Zea mays]	RecName: Full=Aspartic proteinase nepenthesin-1; EC=3.4.23.12; AltName: Full=Nepenthesin-I; Flags: Precursor;	SubName: Full=Eukaryotic aspartyl protease family protein {ECO:0000313|EMBL:ONM24155.1};	Aspartyl protease	GO:0005576,extracellular region; GO:0004190,aspartic-type endopeptidase activity	PF14543.6:Xylanase inhibitor N-terminal
gene-LOC100273206	NC_050100.1	48606166	48607312	-	5.94	6.76	3.87	20.53	18.17	30.56	1.885	0.000129231	0.00657162	up	K12822 RNA-binding protein 25 | (RefSeq) RNA-binding protein 25 (A)	uncharacterized protein LOC100273206 precursor [Zea mays]	RecName: Full=Early nodulin-like protein 2; AltName: Full=Phytocyanin-like protein; Flags: Precursor;	SubName: Full=Early nodulin-like protein 9 {ECO:0000313|EMBL:AQK66329.1};	--	GO:0031225,anchored component of membrane; GO:0046658,anchored component of plasma membrane; GO:0048046,apoplast; GO:0009507,chloroplast; GO:0005886,plasma membrane; GO:0005773,vacuole; GO:0009055,electron transfer activity	PF02298.17:Plastocyanin-like domain
gene-LOC100273251	NC_050097.1	20057577	20059096	-	1.02	0.26	0.9	9.15	6.22	19.72	3.846	5.57987e-07	6.77253e-05	up	K13495 cis-zeatin O-glucosyltransferase [EC:2.4.1.215] | (RefSeq) uncharacterized protein LOC100273251 (A)	uncharacterized protein LOC100273251 [Zea mays]	RecName: Full=Putative cis-zeatin O-glucosyltransferase; EC=2.4.1.215;	RecName: Full=Glycosyltransferase {ECO:0000256|RuleBase:RU362057}; EC=2.4.1.- {ECO:0000256|RuleBase:RU362057};	UDP-glucuronosyl and UDP-glucosyl transferase	GO:0050502,cis-zeatin O-beta-D-glucosyltransferase activity; GO:0008152,metabolic process	PF00201.18:UDP-glucoronosyl and UDP-glucosyl transferase
gene-LOC100273252	NC_050096.1	11057496	11058772	-	2.59	3.89	5.3	2.59	2.4	1.46	-1.081	0.000665555	0.023679	down	K19041 E3 ubiquitin-protein ligase RNF38/44 [EC:2.3.2.27] | (RefSeq) RING-H2 finger protein ATL16-like (A)	putative RING zinc finger domain superfamily protein [Zea mays]	RecName: Full=RING-H2 finger protein ATL1; EC=2.3.2.27 {ECO:0000305}; AltName: Full=RING-type E3 ubiquitin transferase ATL1 {ECO:0000305};	SubName: Full=RING-H2 finger protein ATL16 {ECO:0000313|EMBL:ONL93684.1};	FOG: Predicted E3 ubiquitin ligase	GO:0016021,integral component of membrane; GO:0046872,metal ion binding; GO:0061630,ubiquitin protein ligase activity; GO:0043161,proteasome-mediated ubiquitin-dependent protein catabolic process	PF13639.6:Ring finger domain
gene-LOC100273265	NC_050096.1	207280511	207281620	+	17.03	17.89	22.75	40.3	67.46	61.76	1.365	0.000134602	0.00676506	up	K19747 BAHD acyltransferase [EC:2.3.1.-] | (RefSeq) BAHD acyltransferase DCR (A)	uncharacterized protein LOC100273265 [Zea mays]	--	SubName: Full=Calcium-dependent lipid-binding (CaLB domain) family protein {ECO:0000313|EMBL:ONM03899.1};	--	--	PF00168.30:C2 domain
gene-LOC100273307	NC_050099.1	27077942	27079446	-	0.29	0.19	0.35	1.39	0.94	2.14	2.282	0.000604127	0.0219435	up	K01193 beta-fructofuranosidase [EC:3.2.1.26] | (RefSeq) LOC109747879; beta-fructofuranosidase, insoluble isoenzyme 3-like (A)	uncharacterized protein LOC100273307 [Zea mays]	RecName: Full=UPF0481 protein At3g47200;	SubName: Full=Uncharacterized protein {ECO:0000313|EMBL:ACF85753.1, ECO:0000313|EnsemblPlants:Zm00001d049330_P001};	--	GO:0016021,integral component of membrane; GO:0005886,plasma membrane	PF03140.15:Plant protein of unknown function
gene-LOC100273327	NC_050096.1	273908493	273910798	-	3.79	5.02	2.62	13.36	9.09	21.63	1.806	0.00130703	0.0385494	up	--	putative glycolipid transfer protein (GLTP) family protein [Zea mays]	RecName: Full=ACD11 homolog protein {ECO:0000303|PubMed:18657186}; AltName: Full=Probable ceramide-1-phosphate transfer protein {ECO:0000305};	SubName: Full=Uncharacterized protein {ECO:0000313|EMBL:ACF85822.1};	Uncharacterized conserved protein	GO:0005737,cytoplasm; GO:0005634,nucleus; GO:0120013,intermembrane lipid transfer activity	PF08718.11:Glycolipid transfer protein (GLTP)
gene-LOC100273348	NC_050101.1	143154392	143155881	+	43.77	56.15	53.13	23.08	23.51	16.01	-1.525	2.88736e-19	7.09665e-16	down	K04077 chaperonin GroEL | (RefSeq) chaperonin CPN60-like 2, mitochondrial (A)	uncharacterized protein LOC100273348 [Zea mays]	RecName: Full=NDR1/HIN1-like protein 13 {ECO:0000303|PubMed:26206852};	SubName: Full=Late embryogenesis abundant (LEA) hydroxyproline-rich glycoprotein family {ECO:0000313|EMBL:AQK84726.1};	--	GO:0016021,integral component of membrane; GO:0005886,plasma membrane; GO:0009506,plasmodesma; GO:0042742,defense response to bacterium	PF03168.13:Late embryogenesis abundant protein
gene-LOC100273371	NC_050097.1	35009728	35011728	-	0.04	0.04	0.04	1.67	1.21	1.87	5.075	3.13008e-07	4.15849e-05	up	--	uncharacterized protein LOC100273371 precursor [Zea mays]	--	SubName: Full=Uncharacterized protein {ECO:0000313|EMBL:ACF85954.1};	--	--	PF04862.12:Protein of unknown function (DUF642)
gene-LOC100273384	NC_050096.1	181883236	181883991	-	0.29	2.14	1.25	98.46	106.43	138.27	6.466	1.58313e-29	1.16732e-25	up	K12173 BRCA1-A complex subunit BRE | (RefSeq) BRCA1-A complex subunit BRE-like (A)	uncharacterized LOC100273384 precursor [Zea mays]	RecName: Full=Thaumatin-like pathogenesis-related protein 3; Flags: Precursor;	SubName: Full=Osmotin-like protein OSM34 {ECO:0000313|EMBL:ONM02257.1};	--	GO:0050832,defense response to fungus; GO:0031640,killing of cells of other organism	PF00314.17:Thaumatin family
gene-LOC100273457	NC_050100.1	33896216	33898059	+	0.19	0.45	0.22	7.42	1.45	4.24	3.778	1.78079e-07	2.61307e-05	up	K16083 ent-isokaurene C2-hydroxylase [EC:1.14.13.143] | (RefSeq) ent-isokaurene C2-hydroxylase (A)	uncharacterized protein LOC100273457 [Zea mays]	RecName: Full=Ent-isokaurene C2-hydroxylase; EC=1.14.13.143; AltName: Full=Cytochrome P450 71Z6;	SubName: Full=Ent-cassadiene C2-hydroxylase {ECO:0000313|EMBL:AQK65312.1};	Cytochrome P450 CYP2 subfamily	GO:0016021,integral component of membrane; GO:0016020,membrane; GO:0036201,ent-isokaurene C2-hydroxylase activity; GO:0020037,heme binding; GO:0005506,iron ion binding; GO:0016709,oxidoreductase activity, acting on paired donors, with incorporation or reduction of molecular oxygen, NAD(P)H as one donor, and incorporation of one atom of oxygen; GO:0016102,diterpenoid biosynthetic process; GO:00551…	PF00067.22:Cytochrome P450
gene-LOC100273479	NC_050101.1	135945968	135947673	+	20.41	20.91	22.84	63.55	59.68	91.49	1.575	8.25275e-05	0.00457129	up	K00430 peroxidase [EC:1.11.1.7] | (RefSeq) gpm233; uncharacterized protein LOC100273479 precursor (A)	uncharacterized protein LOC100273479 isoform X1 [Zea mays]	RecName: Full=Peroxidase 5 {ECO:0000250|UniProtKB:P22195}; EC=1.11.1.7; Flags: Precursor;	RecName: Full=Peroxidase {ECO:0000256|RuleBase:RU362060, ECO:0000256|SAAS:SAAS00709852}; EC=1.11.1.7 {ECO:0000256|RuleBase:RU362060, ECO:0000256|SAAS:SAAS00709852};	--	GO:0005576,extracellular region; GO:0020037,heme binding; GO:0046872,metal ion binding; GO:0004601,peroxidase activity; GO:0042744,hydrogen peroxide catabolic process; GO:0006979,response to oxidative stress	PF00141.23:Peroxidase
gene-LOC100273482	NC_050098.1	184485730	184489625	-	8.38	6.3	4.05	28.03	17.19	44.63	2.066	0.000841179	0.028129	up	--	hypothetical protein [Zea mays]	--	SubName: Full=Uncharacterized protein {ECO:0000313|EMBL:ACN29207.1, ECO:0000313|EnsemblPlants:Zm00001d042863_P001};	--	--	--
gene-LOC100273561	NC_050102.1	130368063	130370621	-	4.08	6.56	6.58	16.57	18.98	19.85	1.524	1.42498e-07	2.1664e-05	up	K00889 1-phosphatidylinositol-4-phosphate 5-kinase [EC:2.7.1.68] | (RefSeq) phosphatidylinositol 4-phosphate 5-kinase 7 isoform X1 (A)	uncharacterized protein LOC100273561 [Zea mays]	RecName: Full=Phosphatidylinositol 4-phosphate 5-kinase 1; Short=AtPIP5K1; EC=2.7.1.68; AltName: Full=1-phosphatidylinositol 4-phosphate kinase 1; AltName: Full=Diphosphoinositide kinase 1; AltName: Full=PtdIns(4)P-5-kinase 1;	SubName: Full=Histone H3 K4-specific methyltransferase SET7/9 family protein {ECO:0000313|EMBL:ONM55426.1};	Junctional membrane complex protein Junctophilin and related MORN repeat proteins	GO:0005886,plasma membrane; GO:0016308,1-phosphatidylinositol-4-phosphate 5-kinase activity; GO:0051015,actin filament binding; GO:0003785,actin monomer binding; GO:0005524,ATP binding; GO:0016307,phosphatidylinositol phosphate kinase activity	PF02493.20:MORN repeat
gene-LOC100273892	NC_050098.1	229359730	229361594	+	0.77	1.63	1.73	0.77	0.68	0.44	-1.328	0.000849775	0.028356	down	K08900 mitochondrial chaperone BCS1 | (RefSeq) AAA-ATPase At3g50940-like (A)	uncharacterized protein LOC100273892 [Zea mays]	RecName: Full=Protein HYPER-SENSITIVITY-RELATED 4 {ECO:0000303|PubMed:15181213}; Short=AtHSR4 {ECO:0000303|PubMed:15181213}; EC=3.6.1.3 {ECO:0000250|UniProtKB:Q9FLD5}; AltName: Full=BCS1-like protein;	SubName: Full=Protein HYPER-SENSITIVITY-RELATED 4 {ECO:0000313|EMBL:ONM41090.1};	AAA+-type ATPase	GO:0016021,integral component of membrane; GO:0005740,mitochondrial envelope; GO:0005741,mitochondrial outer membrane; GO:0005739,mitochondrion; GO:0005524,ATP binding; GO:0016887,ATPase activity; GO:0042802,identical protein binding; GO:0008219,cell death; GO:0009626,plant-type hypersensitive response; GO:0009617,response to bacterium; GO:0002237,response to molecule of bacterial origin; GO:0009…	PF14363.6:Domain associated at C-terminal with AAA
gene-LOC100273913	NC_050096.1	143509893	143511825	+	7.82	5.15	3.66	1.3	1.25	2.43	-1.963	0.00145889	0.0417752	down	K09338 homeobox-leucine zipper protein | (RefSeq) homeobox-leucine zipper protein HOX4-like (A)	putative homeobox DNA-binding and leucine zipper domain family protein isoform X1 [Zea mays]	RecName: Full=Homeobox-leucine zipper protein HOX8; AltName: Full=HD-ZIP protein HOX8; AltName: Full=Homeodomain transcription factor HOX8; AltName: Full=OsHox8;	SubName: Full=HB transcription factor {ECO:0000313|EMBL:AIB05047.1}; SubName: Full=Homeobox-leucine zipper protein ATHB-6 {ECO:0000313|EMBL:ONM01069.1};	Transcription factor HEX, contains HOX and HALZ domains	GO:0005634,nucleus; GO:0003700,DNA-binding transcription factor activity; GO:0043565,sequence-specific DNA binding; GO:0006351,transcription, DNA-templated	PF00046.29:Homeodomain
gene-LOC100273946	NC_050099.1	241716944	241718452	-	0.54	0.55	0.33	2.03	2.07	2.76	2.087	7.00088e-05	0.00400163	up	K01213 galacturan 1,4-alpha-galacturonidase [EC:3.2.1.67] | (RefSeq) uncharacterized protein LOC100273946 precursor (A)	uncharacterized protein LOC100273946 precursor [Zea mays]	RecName: Full=Exopolygalacturonase; Short=ExoPG; EC=3.2.1.67; AltName: Full=Galacturan 1,4-alpha-galacturonidase; AltName: Full=Pectinase; Flags: Precursor;	SubName: Full=Uncharacterized protein {ECO:0000313|EMBL:ACF87086.1, ECO:0000313|EnsemblPlants:Zm00001d053662_P001};	--	GO:0005618,cell wall; GO:0005576,extracellular region; GO:0047911,galacturan 1,4-alpha-galacturonidase activity; GO:0004650,polygalacturonase activity; GO:0005975,carbohydrate metabolic process; GO:0071555,cell wall organization	PF00295.17:Glycosyl hydrolases family 28
gene-LOC100273965	NC_050098.1	45547335	45562304	-	3.34	3.13	2.13	12.56	10.46	13.7	1.867	1.16423e-05	0.000913242	up	K12818 ATP-dependent RNA helicase DHX8/PRP22 [EC:3.6.4.13] | (RefSeq) hypothetical protein (A)	major facilitator superfamily defense 1 isoform X3 [Zea mays]	RecName: Full=Protein ZINC INDUCED FACILITATOR-LIKE 1; AltName: Full=Protein ZIF-LIKE 1;	SubName: Full=Uncharacterized protein {ECO:0000313|EMBL:ACF87116.1};	Permease of the major facilitator superfamily	GO:0016021,integral component of membrane; GO:0009705,plant-type vacuole membrane; GO:0005886,plasma membrane; GO:0022821,potassium ion antiporter activity; GO:0010540,basipetal auxin transport; GO:0009630,gravitropism; GO:0090333,regulation of stomatal closure; GO:0080167,response to karrikin; GO:0009414,response to water deprivation; GO:0048364,root development	PF07690.16:Major Facilitator Superfamily
gene-LOC100274125	NC_050104.1	157808132	157815712	-	1.09	2.09	1.8	6.1	6.99	5.77	1.742	1.496e-12	7.60741e-10	up	K05665 ATP-binding cassette, subfamily C (CFTR/MRP), member 1 [EC:7.6.2.3] | (RefSeq) ABC transporter C family member 3 (A)	ABC transporter C family member 3 [Zea mays]	RecName: Full=ABC transporter C family member 3; Short=ABC transporter ABCC.3; Short=AtABCC3; EC=3.6.3.44; AltName: Full=ATP-energized glutathione S-conjugate pump 3; AltName: Full=Glutathione S-conjugate-transporting ATPase 3; AltName: Full=Multidrug resistance-associated protein 3;	SubName: Full=ABC transporter C family member 3 {ECO:0000313|EMBL:AQL09399.1};	Multidrug resistance-associated protein/mitoxantrone resistance protein, ABC superfamily	GO:0048046,apoplast; GO:0016021,integral component of membrane; GO:0000325,plant-type vacuole; GO:0009506,plasmodesma; GO:0005774,vacuolar membrane; GO:0005773,vacuole; GO:0005524,ATP binding; GO:0042626,ATPase activity, coupled to transmembrane movement of substances; GO:0010290,chlorophyll catabolite transmembrane transporter activity; GO:0015431,glutathione S-conjugate-exporting ATPase activit…	PF00005.27:ABC transporter
gene-LOC100274152	NC_050096.1	10986358	10988707	-	4.51	6.75	6.21	2.21	3.28	2.96	-1.233	9.88858e-05	0.00527674	down	K17500 integrin-linked kinase-associated serine/threonine phosphatase 2C [EC:3.1.3.16] | (RefSeq) WAT1-related protein At3g18200 isoform X1 (A)	WAT1-related protein [Zea mays]	RecName: Full=WAT1-related protein At2g39510;	SubName: Full=WAT1-related protein {ECO:0000313|EMBL:ONL93681.1};	--	GO:0016021,integral component of membrane; GO:0005886,plasma membrane; GO:0015186,L-glutamine transmembrane transporter activity; GO:0080144,amino acid homeostasis; GO:0044746,NA; GO:0098712,L-glutamate import across plasma membrane; GO:0048316,seed development	PF00892.20:EamA-like transporter family
gene-LOC100274244	NC_050097.1	169115227	169116714	+	39.49	56.64	52.16	113.37	123.34	194.62	1.41	0.000684178	0.0241666	up	K19747 BAHD acyltransferase [EC:2.3.1.-] | (RefSeq) BAHD acyltransferase DCR (A)	uncharacterized protein LOC100274244 [Zea mays]	RecName: Full=Protein SRC2 homolog {ECO:0000305}; Short=AtSRC2 {ECO:0000303|PubMed:16227454};	SubName: Full=Calcium-dependent lipid-binding (CaLB domain) family protein {ECO:0000313|EMBL:ONM20827.1};	--	GO:0005783,endoplasmic reticulum; GO:0005789,endoplasmic reticulum membrane; GO:0016021,integral component of membrane; GO:0005886,plasma membrane; GO:0000326,protein storage vacuole; GO:0032586,protein storage vacuole membrane; GO:0006623,protein targeting to vacuole	PF00168.30:C2 domain
gene-LOC100274267	NC_050097.1	192942555	192944067	-	0.73	1.03	0.91	3.03	2.42	5.17	1.877	0.000452684	0.0176606	up	K10664 E3 ubiquitin-protein ligase ATL6/9/15/31/42/55 [EC:2.3.2.27] | (RefSeq) putative RING zinc finger domain superfamily protein precursor (A)	putative RING zinc finger domain superfamily protein precursor [Zea mays]	RecName: Full=E3 ubiquitin-protein ligase ATL6; EC=2.3.2.27 {ECO:0000269|PubMed:15644464}; AltName: Full=RING-H2 finger protein ATL6; AltName: Full=RING-type E3 ubiquitin transferase ATL6 {ECO:0000305}; Flags: Precursor;	SubName: Full=E3 ubiquitin-protein ligase ATL6 {ECO:0000313|EMBL:ONM22387.1};	FOG: Predicted E3 ubiquitin ligase	GO:0016021,integral component of membrane; GO:0005886,plasma membrane; GO:0046872,metal ion binding; GO:0061630,ubiquitin protein ligase activity; GO:0004842,ubiquitin-protein transferase activity; GO:0009816,defense response to bacterium, incompatible interaction; GO:0009814,defense response, incompatible interaction; GO:0043161,proteasome-mediated ubiquitin-dependent protein catabolic process; …	PF13639.6:Ring finger domain
gene-LOC100274297	NC_050104.1	158040324	158041510	-	0.42	0.52	0.4	1.72	1.27	1.4	1.516	0.00182189	0.0485409	up	--	uncharacterized protein LOC100274297 [Zea mays]	--	SubName: Full=Uncharacterized protein {ECO:0000313|EMBL:ACF87728.1};	--	--	--
gene-LOC100274330	NC_050099.1	246567503	246571016	-	2.45	2.33	1.14	0.33	0.54	0.66	-2.185	0.00018114	0.00854806	down	K16190 glucuronokinase [EC:2.7.1.43] | (RefSeq) transcription factor ABORTED MICROSPORES-like (A)	putative HLH DNA-binding domain superfamily protein [Zea mays]	RecName: Full=Transcription factor TDR {ECO:0000305}; AltName: Full=Basic helix-loop-helix protein 5 {ECO:0000305}; Short=OsbHLH005 {ECO:0000303|PubMed:16896230}; AltName: Full=Protein TAPETUM DEGENERATION RETARDATION {ECO:0000303|PubMed:17138695};	SubName: Full=Transcription factor ABORTED MICROSPORES {ECO:0000313|EMBL:AQK60668.1};	--	GO:0005634,nucleus; GO:0003682,chromatin binding; GO:0003677,DNA binding; GO:0046983,protein dimerization activity; GO:0000978,RNA polymerase II proximal promoter sequence-specific DNA binding; GO:0048653,anther development; GO:0048654,anther morphogenesis; GO:0048657,anther wall tapetum cell differentiation; GO:0009555,pollen development; GO:0006355,regulation of transcription, DNA-templated; GO…	PF00010.26:Helix-loop-helix DNA-binding domain
gene-LOC100274356	NC_050100.1	33367132	33369010	-	0	0.09	0.21	1.09	0.37	1.16	3.028	0.00178247	0.04788	up	K16083 ent-isokaurene C2-hydroxylase [EC:1.14.13.143] | (RefSeq) ent-isokaurene C2-hydroxylase (A)	putative cytochrome P450 superfamily protein [Zea mays]	RecName: Full=Ent-cassadiene C2-hydroxylase; EC=1.14.13.-; AltName: Full=Cytochrome P450 71Z7;	SubName: Full=Ent-cassadiene C2-hydroxylase {ECO:0000313|EMBL:AQK65277.1};	Cytochrome P450 CYP2 subfamily	GO:0016021,integral component of membrane; GO:0016020,membrane; GO:0020037,heme binding; GO:0005506,iron ion binding; GO:0016709,oxidoreductase activity, acting on paired donors, with incorporation or reduction of molecular oxygen, NAD(P)H as one donor, and incorporation of one atom of oxygen; GO:0016102,diterpenoid biosynthetic process; GO:0055114,oxidation-reduction process; GO:0044550,secondar…	PF00067.22:Cytochrome P450
gene-LOC100274367	NC_050103.1	174516145	174517183	-	44.41	40.37	21.08	150.84	126.87	232.56	2.063	0.000199959	0.0091863	up	--	uncharacterized protein LOC100274367 [Zea mays]	RecName: Full=Heme-binding-like protein At3g10130, chloroplastic; Flags: Precursor;	SubName: Full=SOUL heme-binding family protein {ECO:0000313|EMBL:AQK99397.1};	--	GO:0009507,chloroplast; GO:0009535,chloroplast thylakoid membrane; GO:0010287,plastoglobule	PF04832.12:SOUL heme-binding protein
gene-LOC100274400	NC_050101.1	92474906	92476065	-	21.95	84.24	74.2	354.01	329.48	413.21	2.519	1.04387e-07	1.65526e-05	up	K20547 basic endochitinase B [EC:3.2.1.14] | (RefSeq) uncharacterized protein LOC100274400 precursor (A)	uncharacterized protein LOC100274400 precursor [Zea mays]	RecName: Full=Chitinase 12; EC=3.2.1.14; AltName: Full=Basic endochitinase 2; AltName: Full=Pathogenesis related (PR)-3 chitinase 12; Flags: Precursor;	SubName: Full=Uncharacterized protein {ECO:0000313|EMBL:ACF87946.1};	Predicted chitinase	GO:0016231,beta-N-acetylglucosaminidase activity; GO:0008061,chitin binding; GO:0004568,chitinase activity; GO:0008843,endochitinase activity; GO:0006040,amino sugar metabolic process; GO:0016998,cell wall macromolecule catabolic process; GO:0006032,chitin catabolic process; GO:0050832,defense response to fungus; GO:0000272,polysaccharide catabolic process	PF00182.19:Chitinase class I
gene-LOC100274424	NC_050097.1	24840349	24841934	-	14.39	24.51	25.62	12.43	11.57	5.53	-1.362	3.00214e-06	0.000290312	down	K20893 probable galacturonosyltransferase-like 1 [EC:2.4.1.-] | (RefSeq) probable galacturonosyltransferase-like 1 (A)	transferase precursor [Zea mays]	RecName: Full=Probable galacturonosyltransferase-like 4; EC=2.4.1.-; AltName: Full=Galactinol synthase 9; Short=AtGolS9; Short=GolS-9;	RecName: Full=Hexosyltransferase {ECO:0000256|RuleBase:RU362027}; EC=2.4.1.- {ECO:0000256|RuleBase:RU362027};	--	GO:0005794,Golgi apparatus; GO:0000139,Golgi membrane; GO:0016021,integral component of membrane; GO:0090406,pollen tube; GO:0047262,polygalacturonate 4-alpha-galacturonosyltransferase activity; GO:0016757,transferase activity, transferring glycosyl groups; GO:0071555,cell wall organization; GO:0045489,pectin biosynthetic process; GO:0000271,polysaccharide biosynthetic process	PF01501.20:Glycosyl transferase family 8
gene-LOC100274481	NC_050102.1	10810441	10811860	+	1.9	12.22	4.66	35.02	20.39	33.01	2.16	0.000594718	0.0217356	up	K01183 chitinase [EC:3.2.1.14] | (RefSeq) uncharacterized protein LOC100274481 precursor (A)	uncharacterized protein LOC100274481 precursor [Zea mays]	RecName: Full=Xylanase inhibitor protein 1; Short=XIP-1; Short=XIP-I; AltName: Full=Class III chitinase homolog; Flags: Precursor;	SubName: Full=Uncharacterized protein {ECO:0000313|EMBL:ACF88165.1};	Chitinase	GO:0005576,extracellular region; GO:0005975,carbohydrate metabolic process; GO:0006952,defense response	PF00704.28:Glycosyl hydrolases family 18
gene-LOC100274507	NC_050097.1	46603534	46605410	-	1.55	1.92	1.41	20.19	16.14	27.9	3.56	9.10845e-15	7.90131e-12	up	K22374 3''-deamino-3''-oxonicotianamine reductase [EC:1.1.1.285] | (RefSeq) NAD(P)H-dependent 6'-deoxychalcone synthase-like (A)	putative oxidoreductase, aldo/keto reductase family protein [Zea mays]	RecName: Full=Deoxymugineic acid synthase 1 {ECO:0000303|PubMed:16926158}; Short=HvDMAS1 {ECO:0000303|PubMed:16926158}; EC=1.1.1.285 {ECO:0000269|PubMed:16667646, ECO:0000269|PubMed:16926158};	SubName: Full=Aldose reductase {ECO:0000313|EMBL:ADU32869.1}; SubName: Full=NAD(P)-linked oxidoreductase superfamily protein {ECO:0000313|EMBL:ONM17103.1};	Aldo/keto reductase family proteins	GO:0033707,3''-deamino-3''-oxonicotianamine reductase activity; GO:0034224,cellular response to zinc ion starvation; GO:1990641,response to iron ion starvation; GO:0019290,siderophore biosynthetic process	PF00248.21:Aldo/keto reductase family
gene-LOC100274555	NC_050098.1	205448400	205450105	-	0.16	0.56	0.44	8.6	3.42	9.82	4.158	9.19564e-11	3.15368e-08	up	K12938 anthocyanidin 5,3-O-glucosyltransferase [EC:2.4.1.-] | (RefSeq) anthocyanidin 5,3-O-glucosyltransferase (A)	uncharacterized protein LOC100274555 [Zea mays]	RecName: Full=Anthocyanidin 5,3-O-glucosyltransferase; EC=2.4.1.-; AltName: Full=UDP-glucose: anthocyanidin 5,3-O-glucosyltransferase;	RecName: Full=Glycosyltransferase {ECO:0000256|RuleBase:RU362057}; EC=2.4.1.- {ECO:0000256|RuleBase:RU362057};	UDP-glucuronosyl and UDP-glucosyl transferase	GO:0016758,transferase activity, transferring hexosyl groups; GO:0009718,anthocyanin-containing compound biosynthetic process	PF00201.18:UDP-glucoronosyl and UDP-glucosyl transferase
gene-LOC100274724	NC_050104.1	103290908	103291619	+	2.25	2.27	3.59	7.44	10.09	14.42	1.839	0.00018768	0.00877248	up	--	uncharacterized protein LOC100274724 [Zea mays]	RecName: Full=Protein GLUTAMINE DUMPER 4;	SubName: Full=Uncharacterized protein {ECO:0000313|EMBL:AQL04824.1, ECO:0000313|EnsemblPlants:Zm00001d046667_P001};	--	GO:0016021,integral component of membrane; GO:0006865,amino acid transport; GO:0080143,regulation of amino acid export	--
gene-LOC100274775	NC_050101.1	166515785	166516712	-	1.97	1.66	2.18	6.76	6.22	5.95	1.481	4.60528e-05	0.00285852	up	--	uncharacterized protein LOC100274775 precursor [Zea mays]	--	SubName: Full=Uncharacterized protein {ECO:0000313|EMBL:ACG24853.1, ECO:0000313|EnsemblPlants:Zm00001d038523_P001};	--	--	--
gene-LOC100274910	NC_050098.1	23000625	23001621	+	2.93	6.66	5.08	16.97	20.82	16.38	1.71	7.47846e-09	1.59833e-06	up	--	uncharacterized protein LOC100382405 [Zea mays]	RecName: Full=Protein NEGATIVE REGULATOR OF RESISTANCE {ECO:0000303|PubMed:16115061}; AltName: Full=NPR1-interactor {ECO:0000305};	SubName: Full=NPR1 interactor {ECO:0000313|EMBL:ONM30270.1};	--	GO:0005634,nucleus; GO:0042742,defense response to bacterium; GO:0010112,regulation of systemic acquired resistance	PF15699.5:NPR1 interacting
gene-LOC100274938	NC_050097.1	44602160	44602768	+	0	0	0	2.18	1.57	1.96	6.702	5.47471e-07	6.67236e-05	up	--	uncharacterized protein LOC100274938 [Zea mays]	--	SubName: Full=Uncharacterized protein {ECO:0000313|EMBL:ACG25782.1, ECO:0000313|EnsemblPlants:Zm00001d003447_P001};	--	--	--
gene-LOC100274968	NC_050098.1	54738586	54739282	+	1.58	1.76	0.88	9.94	16.15	18.82	3.224	2.76219e-09	6.67771e-07	up	--	uncharacterized LOC100274968 [Zea mays]	--	SubName: Full=DUF4228 domain protein {ECO:0000313|EMBL:ONM31677.1};	--	--	PF14009.6:Domain of unknown function (DUF4228)
gene-LOC100275070	NC_050099.1	143089334	143092885	+	3.7	4.52	6.41	13.69	21.27	19.85	1.735	9.92789e-07	0.000110887	up	K00759 adenine phosphoribosyltransferase [EC:2.4.2.7] | (RefSeq) uncharacterized protein LOC100275070 (A)	uncharacterized protein LOC100275070 isoform X3 [Zea mays]	RecName: Full=Adenine phosphoribosyltransferase 2; Short=APRT 2; Short=AtAPT2; EC=2.4.2.7;	SubName: Full=Adenine phosphoribosyltransferase 2 {ECO:0000313|EMBL:AQK53582.1};	Adenine phosphoribosyl transferases	GO:0005829,cytosol; GO:0005794,Golgi apparatus; GO:0005886,plasma membrane; GO:0003999,adenine phosphoribosyltransferase activity; GO:0015114,phosphate ion transmembrane transporter activity; GO:0006168,adenine salvage; GO:0044209,AMP salvage; GO:0006166,purine ribonucleoside salvage	PF00156.27:Phosphoribosyl transferase domain
gene-LOC100275072	NC_050101.1	30366564	30370554	-	1.81	2.26	1.93	4.58	9.66	4.63	1.4	0.000117725	0.00611302	up	--	hypothetical protein [Zea mays]	--	SubName: Full=Uncharacterized protein {ECO:0000313|EMBL:ACG26285.1, ECO:0000313|EnsemblPlants:Zm00001d035319_P001};	--	GO:0016021,integral component of membrane	--
gene-LOC100275154	NC_050103.1	165213266	165214034	+	25.81	39.99	38.7	100.41	117.41	96.94	1.399	1.52016e-11	6.6583e-09	up	--	uncharacterized protein LOC100275154 [Zea mays]	--	SubName: Full=Uncharacterized protein {ECO:0000313|EMBL:ACG26645.1};	--	--	PF12734.7:Cysteine-rich TM module stress tolerance
gene-LOC100275155	NC_050105.1	90368763	90369231	-	1.53	1.78	3.13	19.88	34.08	17.91	3.249	5.11916e-16	6.86293e-13	up	--	uncharacterized protein LOC100275155 [Zea mays]	--	SubName: Full=Uncharacterized protein {ECO:0000313|EMBL:ACG26656.1, ECO:0000313|EnsemblPlants:Zm00001d024802_P001};	--	--	--
gene-LOC100275177	NC_050099.1	146713032	146714101	-	0.82	1.82	1.46	3.95	3.43	4.36	1.368	0.000881252	0.0291386	up	--	uncharacterized protein LOC100275177 [Zea mays]	--	SubName: Full=Embryo sac development arrest 6 {ECO:0000313|EMBL:AQK53682.1};	--	--	--
gene-LOC100275179	NC_050104.1	93617114	93618331	-	4.01	3.21	5.07	57.39	57.77	73.11	3.754	1.74188e-18	3.425e-15	up	--	uncharacterized protein LOC100275179 [Zea mays]	--	SubName: Full=Uncharacterized protein {ECO:0000313|EMBL:ACG26857.1};	--	--	--
gene-LOC100275282	NC_050098.1	208490615	208491402	-	0.84	1.77	1.98	18.04	16.71	20.73	3.454	1.11524e-17	1.93488e-14	up	--	uncharacterized protein LOC100275282 [Zea mays]	--	SubName: Full=Uncharacterized protein {ECO:0000313|EMBL:ACG27250.1, ECO:0000313|EnsemblPlants:Zm00001d043665_P001};	--	GO:0016021,integral component of membrane	PF06772.11:Bacterial low temperature requirement A protein (LtrA)
gene-LOC100275286	NC_050102.1	12513781	12514603	+	19.62	25.07	31.95	71.19	91.72	102.26	1.633	1.72933e-06	0.000179594	up	--	uncharacterized LOC100275286 [Zea mays]	--	SubName: Full=Uncharacterized protein {ECO:0000313|EMBL:ACG27265.1, ECO:0000313|EnsemblPlants:Zm00001d019002_P001};	--	--	--
gene-LOC100275307	NC_050097.1	228835242	228836196	-	1.35	1.21	0.27	58.02	79.45	95.31	6.135	6.38636e-21	2.35449e-17	up	--	uncharacterized protein LOC100275307 isoform X1 [Zea mays]	RecName: Full=Uncharacterized protein At1g05835; Flags: Precursor;	SubName: Full=Uncharacterized protein {ECO:0000313|EMBL:ONM26584.1, ECO:0000313|EnsemblPlants:Zm00001d007349_P001};	--	--	--
gene-LOC100275319	NC_050102.1	107418830	107419461	-	14.04	24.89	16.09	10.88	11.53	8.94	-1.018	0.000297511	0.012662	down	--	putative HLH DNA-binding domain superfamily protein [Zea mays]	RecName: Full=Transcription factor IBH1; Short=OsIBH1; AltName: Full=Basic helix-loop-helix protein 175; Short=OsbHLH175; AltName: Full=Protein ILI1-BINDING BHLH 1; AltName: Full=bHLH transcription factor bHLH175;	SubName: Full=Uncharacterized protein {ECO:0000313|EMBL:ACG27384.1, ECO:0000313|EnsemblPlants:Zm00001d020317_P001};	--	GO:0046983,protein dimerization activity; GO:0009742,brassinosteroid mediated signaling pathway; GO:0040008,regulation of growth; GO:0006355,regulation of transcription, DNA-templated; GO:0006351,transcription, DNA-templated	--
gene-LOC100275328	NC_050098.1	152232393	152233218	+	10.01	12.36	9.85	39.06	48.83	64.47	2.074	5.06438e-07	6.27601e-05	up	--	uncharacterized protein LOC100275328 [Zea mays]	--	SubName: Full=Uncharacterized protein {ECO:0000313|EMBL:ACG23959.1, ECO:0000313|EnsemblPlants:Zm00001d042114_P001};	--	GO:0005886,plasma membrane	PF12734.7:Cysteine-rich TM module stress tolerance
gene-LOC100275330	NC_050098.1	199138091	199138933	+	0.65	1.72	0.9	4.05	4.11	5.17	1.89	0.000112107	0.00587299	up	--	uncharacterized protein LOC100275330 [Zea mays]	--	SubName: Full=Uncharacterized protein {ECO:0000313|EMBL:ACG27419.1, ECO:0000313|EnsemblPlants:Zm00001d043338_P001};	--	--	--
gene-LOC100275341	NC_050097.1	237252797	237256251	-	0.3	0.05	0.17	1.59	1.03	1.85	2.897	0.000260476	0.0114153	up	K20606 mitogen-activated protein kinase kinase kinase ANP1 [EC:2.7.11.25] | (RefSeq) receptor-like serine/threonine-protein kinase SD1-7 isoform X1 (A)	uncharacterized LOC100275341 [Zea mays]	RecName: Full=Cell number regulator 13; AltName: Full=ZmCNR13;	SubName: Full=Uncharacterized protein {ECO:0000313|EMBL:ACG27492.1};	--	GO:0016021,integral component of membrane	PF07714.17:Protein tyrosine kinase
gene-LOC100275370	NC_050096.1	43454410	43456341	+	1.17	2.05	1.54	8.2	5.31	11.7	2.293	3.96775e-06	0.000370331	up	--	uncharacterized protein LOC100275370 [Zea mays]	--	SubName: Full=Uncharacterized protein {ECO:0000313|EMBL:ACF82138.1};	--	--	--
gene-LOC100275374	NC_050101.1	107009616	107011705	-	0	0.34	0.32	2.29	1.61	3.48	3.436	2.79024e-05	0.00189185	up	--	unknown [Zea mays]	--	SubName: Full=Ubiquitin system component Cue protein {ECO:0000313|EMBL:AQK81879.1};	--	--	PF03474.14:DMRTA motif
gene-LOC100275414	NC_050096.1	41367640	41371274	+	1.07	1.82	1.55	4.99	3.85	5.41	1.531	1.99335e-05	0.00143907	up	K11267 sister chromatid cohesion protein PDS5 | (RAP-DB) Os06g0285900; Similar to embryogenesis transmembrane protein. (A)	uncharacterized protein LOC100275414 [Zea mays]	--	SubName: Full=Uncharacterized protein {ECO:0000313|EMBL:ACG27901.1};	FOG: Ankyrin repeat	GO:0016021,integral component of membrane	PF13962.6:Domain of unknown function
gene-LOC100275415	NC_050103.1	173735995	173738282	-	23.14	19.85	18.11	8.77	9.99	10.83	-1.277	0.000769065	0.0265296	down	--	Tetratricopeptide repeat (TPR)-like superfamily protein [Zea mays]	--	SubName: Full=Tetratricopeptide repeat (TPR)-like superfamily protein {ECO:0000313|EMBL:AQK99342.1};	--	--	PF13431.6:Tetratricopeptide repeat
gene-LOC100275426	NC_050097.1	61309292	61312373	+	33.69	22.33	15.85	78.36	85.57	164.62	1.982	0.00111864	0.0344038	up	--	hypothetical protein ZEAMMB73_Zm00001d003833 [Zea mays]	RecName: Full=Uncharacterized protein At4g22758;	SubName: Full=Uncharacterized protein {ECO:0000313|EMBL:ONM17798.1, ECO:0000313|EnsemblPlants:Zm00001d003833_P001};	FOG: PPR repeat	--	--
gene-LOC100275439	NC_050099.1	24963820	24964557	+	0.69	6.39	4.83	30.87	20.51	27.02	2.647	3.9632e-05	0.00253559	up	--	uncharacterized protein LOC100275439 precursor [Zea mays]	--	SubName: Full=Uncharacterized protein {ECO:0000313|EMBL:ACG28091.1, ECO:0000313|EnsemblPlants:Zm00001d049288_P001};	--	--	--
gene-LOC100275443	NC_050100.1	6356541	6357768	+	3.05	4.43	5.09	10.7	11.03	8.94	1.085	5.7357e-06	0.000512632	up	--	uncharacterized protein LOC100275823 [Zea mays]	RecName: Full=CCG-binding protein 1; Short=AtCBP1 {ECO:0000303|PubMed:26462908}; AltName: Full=Protein MATERNAL EFFECT EMBRYO ARREST 14 {ECO:0000305};	SubName: Full=CCG-binding protein 1 {ECO:0000313|EMBL:AQK62625.1};	--	GO:0009507,chloroplast; GO:0005829,cytosol; GO:0005634,nucleus; GO:0036033,mediator complex binding; GO:0050832,defense response to fungus; GO:0009793,embryo development ending in seed dormancy; GO:0010183,pollen tube guidance	--
gene-LOC100275516	NC_050100.1	117607228	117608288	+	2.88	3.74	3.42	10.25	9.37	10.88	1.418	1.25466e-05	0.000968719	up	--	hypothetical protein ZEAMMB73_Zm00001d015767 [Zea mays]	--	SubName: Full=Uncharacterized protein {ECO:0000313|EMBL:AQK69512.1, ECO:0000313|EnsemblPlants:Zm00001d015767_P002};	--	--	PF07491.11:Protein phosphatase inhibitor
gene-LOC100275522	NC_050098.1	22731861	22733006	+	10.82	14.41	12.63	6.31	7.59	1.63	-1.597	0.000863005	0.0286961	down	--	uncharacterized protein LOC100275522 [Zea mays]	--	SubName: Full=Uncharacterized protein {ECO:0000313|EMBL:ACG28607.1, ECO:0000313|EnsemblPlants:Zm00001d039993_P001};	--	--	--
gene-LOC100275543	NC_050101.1	165490524	165513949	+	1.85	1.98	0.88	24.97	36.33	44.42	4.276	9.24521e-16	1.13616e-12	up	K16224 senescence-induced receptor-like serine/threonine-protein kinase | (RefSeq) senescence-induced receptor-like serine/threonine-protein kinase (A)	uncharacterized protein LOC100275543 isoform X3 [Zea mays]	RecName: Full=Putative leucine-rich repeat receptor-like protein kinase At2g19210; EC=2.7.11.1; Flags: Precursor;	SubName: Full=Uncharacterized protein {ECO:0000313|EMBL:EES19691.2};	--	GO:0016021,integral component of membrane; GO:0005886,plasma membrane; GO:0005524,ATP binding; GO:0004674,protein serine/threonine kinase activity	PF12819.7:Malectin-like domain
gene-LOC100275553	NC_050100.1	117775664	117778038	+	1.07	1.29	0.66	7.79	10.75	9.43	2.99	9.8615e-13	5.47589e-10	up	K01193 beta-fructofuranosidase [EC:3.2.1.26] | (RefSeq) LOC109747879; beta-fructofuranosidase, insoluble isoenzyme 3-like (A)	uncharacterized protein LOC100275553 [Zea mays]	RecName: Full=Putative UPF0481 protein At3g02645;	SubName: Full=Putative UPF0481 protein {ECO:0000313|EMBL:AQK69516.1};	--	GO:0016021,integral component of membrane	PF03140.15:Plant protein of unknown function
gene-LOC100275644	NC_050100.1	104723016	104723811	-	3.6	4.41	3.92	7.94	13.07	11.27	1.235	0.000713932	0.0250675	up	--	uncharacterized protein LOC100275644 [Zea mays]	RecName: Full=Protein GLUTAMINE DUMPER 4;	SubName: Full=Uncharacterized protein {ECO:0000313|EMBL:ACG29431.1};	--	GO:0016021,integral component of membrane; GO:0006865,amino acid transport; GO:0080143,regulation of amino acid export	--
gene-LOC100275684	NC_050104.1	106016470	106017640	-	3.2	2.71	1.53	10.49	6.91	13.24	1.827	0.00117102	0.0357538	up	--	uncharacterized protein LOC100275684 [Zea mays]	--	SubName: Full=Uncharacterized protein {ECO:0000313|EMBL:AQL04967.1, ECO:0000313|EnsemblPlants:Zm00001d046745_P001};	--	GO:0016021,integral component of membrane	--
gene-LOC100275716	NC_050096.1	280056473	280057214	+	1.81	3.67	3.2	15.55	9.46	9.48	1.801	1.8474e-06	0.000189851	up	--	uncharacterized protein LOC100275716 [Zea mays]	--	SubName: Full=Uncharacterized protein {ECO:0000313|EMBL:ONM08908.1, ECO:0000313|EnsemblPlants:Zm00001d033909_P001};	--	--	--
gene-LOC100275758	NC_050105.1	95355971	95356569	+	1.2	1.02	3.16	13.95	16.03	11.25	2.727	2.36921e-09	5.97243e-07	up	--	uncharacterized protein LOC100275758 precursor [Zea mays]	--	SubName: Full=Uncharacterized protein {ECO:0000313|EMBL:ACG30035.1, ECO:0000313|EnsemblPlants:Zm00001d024897_P001};	--	--	--
gene-LOC100275767	NC_050099.1	40995867	40997429	+	0	0.04	0	0.98	0.48	1.03	5.939	1.59913e-05	0.00119103	up	K19747 BAHD acyltransferase [EC:2.3.1.-] | (RefSeq) BAHD acyltransferase DCR (A)	uncharacterized protein LOC100275767 [Zea mays]	RecName: Full=Uncharacterized acetyltransferase At3g50280; EC=2.3.1.-;	SubName: Full=HXXXD-type acyl-transferase family protein {ECO:0000313|EMBL:AQK51102.1};	--	GO:0016747,transferase activity, transferring acyl groups other than amino-acyl groups	PF02458.15:Transferase family
gene-LOC100275815	NC_050105.1	95117895	95118722	-	0.8	1.01	1.49	9.91	16.81	7.64	3.138	6.83039e-15	6.29548e-12	up	--	uncharacterized protein LOC100275815 precursor [Zea mays]	--	SubName: Full=Uncharacterized protein {ECO:0000313|EMBL:AQK42262.1, ECO:0000313|EnsemblPlants:Zm00001d024893_P001};	--	--	--
gene-LOC100275817	NC_050097.1	181784125	181785052	+	0.36	1.2	0.97	9.33	3.9	9.39	3.07	4.06438e-07	5.24989e-05	up	--	uncharacterized protein LOC100275817 [Zea mays]	--	SubName: Full=Uncharacterized protein {ECO:0000313|EMBL:ACG30342.1, ECO:0000313|EnsemblPlants:Zm00001d005654_P001};	--	--	PF05553.11:Cotton fibre expressed protein
gene-LOC100275821	NC_050098.1	186795157	186797181	-	2.02	1.75	0.8	12.8	12.77	24.42	3.256	1.55262e-07	2.31278e-05	up	K01513 ectonucleotide pyrophosphatase/phosphodiesterase family member 1/3 [EC:3.1.4.1 3.6.1.9] | (RefSeq) uncharacterized protein LOC109769794 (A)	uncharacterized protein LOC100275821 [Zea mays]	--	SubName: Full=Plant-specific domain TIGR01589 family protein expressed {ECO:0000313|EMBL:ONM36584.1};	--	--	PF09713.10:Plant protein 1589 of unknown function (A_thal_3526)
gene-LOC100275892	NC_050099.1	14596328	14597034	-	1.48	2.92	2.54	11.6	10.31	21.49	2.557	1.66754e-06	0.000173789	up	--	uncharacterized protein LOC100275892 [Zea mays]	--	SubName: Full=Uncharacterized protein {ECO:0000313|EMBL:ACG27079.1, ECO:0000313|EnsemblPlants:Zm00001d049060_P001};	--	--	--
gene-LOC100275900	NC_050098.1	161340164	161340710	+	1.41	1.94	1.12	20.68	27.84	55.36	4.428	1.1341e-12	6.08168e-10	up	--	uncharacterized protein LOC100275900 [Zea mays]	--	SubName: Full=Uncharacterized protein {ECO:0000313|EMBL:ACG30674.1, ECO:0000313|EnsemblPlants:Zm00001d042317_P001};	--	--	--
gene-LOC100275904	NC_050101.1	138952908	138953492	-	8.95	9.82	6.87	3.05	3.18	2.48	-1.808	1.34348e-06	0.000143567	down	--	uncharacterized protein LOC100275904 [Zea mays]	--	SubName: Full=ROTUNDIFOLIA like 12 {ECO:0000313|EMBL:AQK84471.1};	--	--	PF08137.12:DVL family
gene-LOC100275936	NC_050098.1	148632923	148633394	-	97.17	60.62	56.41	24.29	36.52	30.87	-1.51	0.00124507	0.0372059	down	--	uncharacterized protein LOC100275936 [Zea mays]	--	SubName: Full=Uncharacterized protein {ECO:0000313|EMBL:ACG28106.1, ECO:0000313|EnsemblPlants:Zm00001d042030_P001};	--	--	--
gene-LOC100276384	NC_050100.1	50330403	50331037	-	0.52	2.02	6.78	0.56	0.63	0.16	-2.941	0.0015363	0.0434021	down	--	uncharacterized protein LOC100276384 [Zea mays]	--	SubName: Full=Wound-responsive family protein {ECO:0000313|EMBL:AQK66381.1};	--	--	PF12609.8:Wound-induced protein
gene-LOC100276385	NC_050096.1	222145790	222146787	-	0.88	2.4	2.94	0.51	0.25	0.52	-2.4	9.00991e-05	0.00494814	down	--	uncharacterized protein LOC100276385 [Zea mays]	--	SubName: Full=Uncharacterized protein {ECO:0000313|EMBL:ONM04773.1, ECO:0000313|EnsemblPlants:Zm00001d032285_P001};	--	--	PF05553.11:Cotton fibre expressed protein
gene-LOC100276653	NC_050097.1	197014709	197016458	-	6.59	8.69	9.71	20.37	20.03	23.52	1.187	7.79592e-05	0.00435479	up	--	uncharacterized protein LOC100276653 isoform X1 [Zea mays]	--	SubName: Full=MTD1 {ECO:0000313|EMBL:ONM22688.1};	Nuclear localization sequence binding protein	--	--
gene-LOC100276676	NC_050100.1	180184379	180185215	+	9.22	7.4	8.65	4.14	4.86	4.52	-1.14	0.00158445	0.0444022	down	--	uncharacterized protein LOC100276676 [Zea mays]	--	SubName: Full=Uncharacterized protein {ECO:0000313|EMBL:ACG36147.1, ECO:0000313|EnsemblPlants:Zm00001d016946_P001};	--	GO:0016021,integral component of membrane	--
gene-LOC100276702	NC_050104.1	21711490	21712774	+	0.13	0.13	0.22	1.23	0.86	1.45	2.717	7.47112e-05	0.00423756	up	--	uncharacterized protein LOC100276702 [Zea mays]	--	SubName: Full=Uncharacterized protein {ECO:0000313|EMBL:AQL02141.1, ECO:0000313|EnsemblPlants:Zm00001d045369_P001};	--	GO:0016021,integral component of membrane	--
gene-LOC100276732	NC_050096.1	169300217	169300802	+	3.86	5.43	4.92	17.13	10.55	13.54	1.349	0.000159926	0.0076932	up	--	uncharacterized protein LOC100276732 [Zea mays]	--	SubName: Full=Uncharacterized protein {ECO:0000313|EMBL:ACG36424.1, ECO:0000313|EnsemblPlants:Zm00001d030915_P001};	--	--	--
gene-LOC100276787	NC_050099.1	162757520	162759361	-	3.81	4.8	5.27	13.89	15.46	12.03	1.364	1.90806e-11	7.81616e-09	up	--	uncharacterized protein LOC100278779 [Zea mays]	--	SubName: Full=PLATZ transcription factor {ECO:0000313|EMBL:AIB05865.1}; SubName: Full=PLATZ transcription factor family protein {ECO:0000313|EMBL:AQK54419.1};	--	--	PF04640.14:PLATZ transcription factor
gene-LOC100276792	NC_050099.1	188391038	188392563	+	0.36	0.22	0.15	1.94	0.72	2.07	2.483	0.000910471	0.0296634	up	--	uncharacterized LOC100276792 [Zea mays]	RecName: Full=Cell number regulator 10; AltName: Full=ZmCNR10;	SubName: Full=PLAC8 family protein {ECO:0000313|EMBL:AQK56708.1};	--	GO:0016021,integral component of membrane	PF11204.8:Protein of unknown function (DUF2985)
gene-LOC100276833	NC_050105.1	90350140	90350678	-	6.55	3	2.9	25.9	37.11	43.19	2.821	1.82829e-06	0.000188544	up	--	uncharacterized protein LOC100276833 [Zea mays]	--	SubName: Full=Uncharacterized protein {ECO:0000313|EMBL:ACG28113.1, ECO:0000313|EnsemblPlants:Zm00001d024800_P001};	--	--	--
gene-LOC100276862	NC_050096.1	240026778	240039988	+	2.25	4.52	3.46	10.27	10.03	13.24	1.579	2.30901e-05	0.00162066	up	--	uncharacterized protein LOC100276862 isoform X2 [Zea mays]	--	SubName: Full=Uncharacterized protein {ECO:0000313|EMBL:ACF82044.1, ECO:0000313|EnsemblPlants:Zm00001d032781_P003};	--	--	PF07063.13:Domain of unknown function (DUF1338)
gene-LOC100276888	NC_050104.1	49014216	49014991	-	0.07	0.65	0.67	3.55	2.07	3.81	2.673	0.000131307	0.00665425	up	--	uncharacterized protein LOC100276888 [Zea mays]	--	SubName: Full=Uncharacterized protein {ECO:0000313|EMBL:AQL03421.1, ECO:0000313|EnsemblPlants:Zm00001d045913_P001};	--	--	--
gene-LOC100277139	NC_050105.1	151076210	151077418	-	5.43	7.98	4.42	14.88	15.75	22.9	1.425	0.00160836	0.0448788	up	--	uncharacterized protein LOC100277139 [Zea mays]	--	SubName: Full=Uncharacterized protein {ECO:0000313|EMBL:ACR38312.1, ECO:0000313|EnsemblPlants:Zm00001d026665_P001};	--	--	--
gene-LOC100277144	NC_050102.1	136466725	136467466	+	21.62	19.47	17.91	59.39	55.27	77.01	1.496	0.000237711	0.0105747	up	--	hypothetical protein [Zea mays]	--	SubName: Full=Uncharacterized protein {ECO:0000313|EMBL:ACG32895.1, ECO:0000313|EnsemblPlants:Zm00001d020872_P001};	--	GO:0016021,integral component of membrane	--
gene-LOC100277272	NC_050105.1	12018882	12020563	+	8.84	14.81	7.85	48.87	47.96	66.77	2.218	1.63752e-07	2.41485e-05	up	K16225 probable WRKY transcription factor 52 | (RefSeq) disease resistance protein RRS1-like (A)	putative WRKY DNA-binding domain superfamily protein [Zea mays]	RecName: Full=Probable WRKY transcription factor 70; AltName: Full=WRKY DNA-binding protein 70;	SubName: Full=Putative WRKY transcription factor 30 {ECO:0000313|EMBL:AQK39664.1};	--	GO:0005634,nucleus; GO:0003700,DNA-binding transcription factor activity; GO:0043565,sequence-specific DNA binding; GO:0042742,defense response to bacterium; GO:0050832,defense response to fungus; GO:0009864,induced systemic resistance, jasmonic acid mediated signaling pathway; GO:1900056,negative regulation of leaf senescence; GO:0045892,negative regulation of transcription, DNA-templated; GO:00…	PF03106.15:WRKY DNA -binding domain
gene-LOC100277300	NC_050103.1	91599640	91600330	-	0.16	0.4	0.82	1.7	2.84	2.63	2.213	0.000759932	0.0262452	up	--	uncharacterized LOC100277300 [Zea mays]	--	SubName: Full=Os05g0181800-like protein {ECO:0000313|EMBL:AQK93126.1};	--	GO:0016021,integral component of membrane	--
gene-LOC100277313	NC_050104.1	22592632	22598876	+	3.35	3.54	4.34	121.96	193.57	200.65	5.345	4.8111e-44	1.41899e-39	up	K19720 collagen, type III, alpha | (RefSeq) hypothetical protein (A)	Ran BP2/NZF zinc finger-like superfamily protein [Zea mays]	RecName: Full=Zinc finger protein VAR3, chloroplastic {ECO:0000305}; AltName: Full=Organelle Zinc finger 1 {ECO:0000303|PubMed:25768119}; AltName: Full=Protein VARIEGATED 3 {ECO:0000303|PubMed:15340011}; Flags: Precursor;	SubName: Full=Ran BP2/NZF zinc finger-like superfamily protein {ECO:0000313|EMBL:AQL02221.1};	RNA-binding Ran Zn-finger protein and related proteins	GO:0009507,chloroplast; GO:0009570,chloroplast stroma; GO:0046872,metal ion binding; GO:1900871,chloroplast mRNA modification; GO:0009658,chloroplast organization; GO:0006397,mRNA processing	PF00641.18:Zn-finger in Ran binding protein and others
gene-LOC100277332	NC_050104.1	116696855	116697426	-	0.48	1.07	0.99	4.45	4.48	6.62	2.482	5.80145e-06	0.000516943	up	--	uncharacterized protein LOC100277332 [Zea mays]	--	SubName: Full=Uncharacterized protein {ECO:0000313|EMBL:AQL05313.1, ECO:0000313|EnsemblPlants:Zm00001d047000_P001};	--	GO:0016021,integral component of membrane	PF08592.11:Domain of unknown function (DUF1772)
gene-LOC100277451	--	--	--	--	4.86	12.14	15.7	4.77	4.16	0.68	-2.016	0.00162934	0.0453783	down	--
gene-LOC100277462	NC_050103.1	139296912	139298320	-	1.69	0.95	1.07	41.74	50.6	83.85	5.372	1.74264e-20	5.71083e-17	up	K19720 collagen, type III, alpha | (RefSeq) hypothetical protein (A)	zinc finger protein [Zea mays]	RecName: Full=Zinc finger protein VAR3, chloroplastic {ECO:0000305}; AltName: Full=Organelle Zinc finger 1 {ECO:0000303|PubMed:25768119}; AltName: Full=Protein VARIEGATED 3 {ECO:0000303|PubMed:15340011}; Flags: Precursor;	SubName: Full=Zinc finger protein {ECO:0000313|EMBL:ACG40847.1};	RNA-binding Ran Zn-finger protein and related proteins	GO:0009507,chloroplast; GO:0009570,chloroplast stroma; GO:0046872,metal ion binding; GO:1900871,chloroplast mRNA modification; GO:0009658,chloroplast organization; GO:0006397,mRNA processing	PF00641.18:Zn-finger in Ran binding protein and others
gene-LOC100277532	NC_050098.1	148184519	148185097	-	0.95	0.67	0.65	6.16	7.03	8.51	3.055	9.87504e-09	2.03674e-06	up	--	uncharacterized protein LOC100277532 precursor [Zea mays]	--	SubName: Full=Uncharacterized protein {ECO:0000313|EMBL:ACG41246.1, ECO:0000313|EnsemblPlants:Zm00001d042014_P001};	--	--	--
gene-LOC100277551	NC_050104.1	70041978	70042722	-	3.48	2.47	2.03	16.96	23.75	31.32	2.959	2.53072e-08	4.7763e-06	up	--	uncharacterized protein LOC100277551 [Zea mays]	--	SubName: Full=Uncharacterized protein {ECO:0000313|EMBL:ACG41323.1, ECO:0000313|EnsemblPlants:Zm00001d046157_P001};	--	--	--
gene-LOC100277587	NC_050097.1	19752930	19753635	+	4.22	4.5	3.62	2.45	2.14	0.95	-1.436	0.000744549	0.0257743	down	--	uncharacterized protein LOC100277587 [Zea mays]	--	SubName: Full=Uncharacterized protein {ECO:0000313|EMBL:ACG41505.1, ECO:0000313|EnsemblPlants:Zm00001d002700_P001};	--	--	--
gene-LOC100277705	NC_050101.1	163610712	163611555	-	3.09	3.75	4.51	9.08	9.37	9.67	1.119	0.000374286	0.0150748	up	--	hypothetical protein ZEAMMB73_Zm00001d038408 [Zea mays]	RecName: Full=Uncharacterized protein At4g08330, chloroplastic; Flags: Precursor;	SubName: Full=Uncharacterized protein {ECO:0000313|EMBL:AQK86579.1, ECO:0000313|EnsemblPlants:Zm00001d038408_P001};	--	GO:0009507,chloroplast; GO:0005886,plasma membrane	PF01641.18:SelR domain
gene-LOC100277712	NC_050098.1	11035557	11036334	+	2.34	2.94	3.71	11.92	7.75	10.26	1.557	2.62537e-05	0.00179242	up	--	hypothetical protein ZEAMMB73_Zm00001d039648 [Zea mays]	--	SubName: Full=Uncharacterized protein {ECO:0000313|EMBL:ONM29576.1, ECO:0000313|EnsemblPlants:Zm00001d039648_P001};	--	--	--
gene-LOC100277721	NC_050096.1	259964700	259969212	-	46.38	70.78	79.71	40.68	37.87	18.73	-1.256	3.67005e-06	0.000345829	down	--	uncharacterized protein LOC100277721 [Zea mays]	--	SubName: Full=p-loop containing nucleoside triphosphate hydrolase superfamily protein {ECO:0000313|EMBL:ONM07155.1};	--	GO:0005524,ATP binding; GO:0016787,hydrolase activity; GO:0016301,kinase activity	PF06414.12:Zeta toxin
gene-LOC100277728	NC_050105.1	138321241	138323329	-	6.3	5.61	3.17	25.82	26.61	49.58	2.568	7.56929e-06	0.000641519	up	--	uncharacterized protein LOC100277728 [Zea mays]	--	SubName: Full=PLATZ transcription factor {ECO:0000313|EMBL:ADX60081.1}; SubName: Full=PLATZ transcription factor family protein {ECO:0000313|EMBL:AQK45397.1};	--	--	PF04640.14:PLATZ transcription factor
gene-LOC100277770	NC_050096.1	43515431	43515969	+	1.64	3.62	2.54	22.5	20.33	32.71	3.161	1.90371e-11	7.81616e-09	up	--	hypothetical protein [Zea mays]	--	SubName: Full=Uncharacterized protein {ECO:0000313|EMBL:ACG27331.1, ECO:0000313|EnsemblPlants:Zm00001d028708_P001};	--	--	--
gene-LOC100277807	NC_050099.1	168757922	168758625	+	2.19	2.46	1.95	5.79	8	4.93	1.265	0.000285778	0.0122395	up	--	--	--	--	--	--	--
gene-LOC100277835	NC_050104.1	157108568	157109785	+	0.21	0.63	0.18	3.18	2.47	4.85	3.27	2.08e-06	0.000211543	up	--	uncharacterized LOC100277835 [Zea mays]	RecName: Full=Protein LURP-one-related 6;	SubName: Full=Uncharacterized protein {ECO:0000313|EMBL:ACG42859.1};	--	--	PF04525.12:LURP-one-related
gene-LOC100277849	NC_050098.1	207176062	207176647	-	4.23	1.33	2.26	84.33	114.92	207.05	5.47	3.27207e-15	3.21688e-12	up	--	uncharacterized protein LOC100277849 [Zea mays]	--	SubName: Full=Uncharacterized protein {ECO:0000313|EMBL:ACG42922.1, ECO:0000313|EnsemblPlants:Zm00001d043610_P001};	--	--	--
gene-LOC100277991	NC_050101.1	163408398	163409003	+	0.45	0.74	0.55	4.12	4.06	4.96	2.755	2.20533e-07	3.11216e-05	up	--	hypothetical protein [Zea mays]	--	SubName: Full=Uncharacterized protein {ECO:0000313|EMBL:ACG43690.1, ECO:0000313|EnsemblPlants:Zm00001d038403_P001};	--	--	--
gene-LOC100278037	NC_050100.1	189574035	189574855	-	0.47	0.34	0.29	1.55	1.96	1.39	1.923	0.000857208	0.0285678	up	--	uncharacterized protein LOC100278037 [Zea mays]	--	SubName: Full=Embryo sac development arrest 6 {ECO:0000313|EMBL:AQK72718.1};	--	--	--
gene-LOC100278087	NC_050100.1	181850336	181851316	-	0	0.44	0.16	9.1	4.97	12.56	5.423	1.06827e-10	3.58039e-08	up	K13459 disease resistance protein RPS2 | (RefSeq) probable disease resistance protein At5g63020 (A)	uncharacterized protein LOC100278087 [Zea mays]	RecName: Full=Heavy metal-associated isoprenylated plant protein 47 {ECO:0000303|PubMed:21072340, ECO:0000303|PubMed:23368984}; Short=AtHIP47 {ECO:0000303|PubMed:21072340, ECO:0000303|PubMed:23368984}; Flags: Precursor;	SubName: Full=Uncharacterized protein {ECO:0000313|EMBL:AQK72125.1, ECO:0000313|EnsemblPlants:Zm00001d017008_P001};	--	GO:0005737,cytoplasm; GO:0046914,transition metal ion binding; GO:0046916,cellular transition metal ion homeostasis; GO:0030001,metal ion transport	--
gene-LOC100278150	NC_050098.1	176996722	176998923	-	0.15	0.3	0.17	1.11	1.1	2.4	2.792	2.68517e-05	0.00182902	up	K19027 zinc finger FYVE domain-containing protein 26 | (RefSeq) hypothetical protein (A)	uncharacterized protein LOC100278150 precursor [Zea mays]	RecName: Full=Dirigent protein 23; Short=AtDIR23; Flags: Precursor;	RecName: Full=Dirigent protein {ECO:0000256|RuleBase:RU363099};	--	GO:0048046,apoplast; GO:0016853,isomerase activity	PF03018.14:Dirigent-like protein
gene-LOC100278307	NC_050101.1	132031535	132032218	-	0	0.24	0.07	2.23	0.73	3.56	4.368	0.000168528	0.00803	up	--	uncharacterized protein LOC100278307 [Zea mays]	--	SubName: Full=Uncharacterized protein {ECO:0000313|EMBL:ACG44996.1, ECO:0000313|EnsemblPlants:Zm00001d037426_P001};	--	GO:0016021,integral component of membrane	--
gene-LOC100278316	NC_050102.1	169218633	169221635	+	0.45	0.79	0.77	3.08	2.09	3.14	1.899	5.16168e-06	0.000468427	up	K03386 peroxiredoxin (alkyl hydroperoxide reductase subunit C) [EC:1.11.1.15] | (RefSeq) 2-Cys peroxiredoxin BAS1, chloroplastic (A)	hypothetical protein ZEAMMB73_Zm00001d021900 [Zea mays]	--	SubName: Full=Uncharacterized protein {ECO:0000313|EMBL:ONM59025.1, ECO:0000313|EnsemblPlants:Zm00001d021900_P001};	--	--	PF06101.11:Vacuolar protein sorting-associated protein 62
gene-LOC100278366	NC_050098.1	209924122	209924637	-	4.81	25.72	15.12	5.33	3.7	1.71	-2.267	0.000149419	0.00726022	down	--	Arabinogalactan peptide 3 [Zea mays]	RecName: Full=Arabinogalactan peptide 3; Short=OsAGPEP3; Flags: Precursor;	SubName: Full=Arabinogalactan peptide 3 {ECO:0000313|EMBL:ONM38862.1};	--	GO:0032578,aleurone grain membrane; GO:0031225,anchored component of membrane; GO:0005773,vacuole	--
gene-LOC100278430	NC_050097.1	194372193	194372842	+	0.76	1.97	0.44	5.49	4.48	6.22	2.207	0.000434445	0.0170393	up	--	uncharacterized protein LOC100278430 [Zea mays]	--	SubName: Full=Uncharacterized protein {ECO:0000313|EMBL:ACF86316.1, ECO:0000313|EnsemblPlants:Zm00001d005989_P001};	--	GO:0016021,integral component of membrane	--
gene-LOC100278496	NC_050096.1	212728154	212730303	+	5.63	11.21	11.64	3.43	3.6	1.63	-1.935	4.38034e-09	9.78741e-07	down	K15082 DNA repair protein RAD7 | (RefSeq) hypothetical protein (A)	uncharacterized protein LOC100278496 precursor [Zea mays]	--	SubName: Full=Ferredoxin-related {ECO:0000313|EMBL:ONM04305.1};	--	--	PF13179.6:Family of unknown function (DUF4006)
gene-LOC100278681	NC_050098.1	182432831	182435426	+	7.93	10.48	10.73	6.63	4.65	4.42	-1.104	1.10183e-05	0.000873587	down	--	uncharacterized LOC100278681 isoform X1 [Zea mays]	--	SubName: Full=Protein BUD31-like protein 1 {ECO:0000313|EMBL:ONM36318.1};	--	--	--
gene-LOC100278795	NC_050099.1	14646493	14647057	-	2.44	2.57	1.59	14.52	12.19	23.49	2.766	4.99453e-07	6.21555e-05	up	--	uncharacterized protein LOC100278795 [Zea mays]	--	SubName: Full=Uncharacterized protein {ECO:0000313|EMBL:AQK49511.1, ECO:0000313|EnsemblPlants:Zm00001d049061_P001};	--	--	--
gene-LOC100278869	NC_050096.1	259400813	259407024	+	33.53	34.75	34.26	22.22	24.2	12.68	-1.072	4.92989e-05	0.00299949	down	--	uncharacterized LOC100278869 isoform X1 [Zea mays]	RecName: Full=VAN3-binding protein {ECO:0000303|PubMed:19363154}; AltName: Full=Protein FORKED 1;	SubName: Full=VAN3-binding protein {ECO:0000313|EMBL:ONM07139.1};	--	GO:0009734,auxin-activated signaling pathway; GO:0010305,leaf vascular tissue pattern formation; GO:0010087,phloem or xylem histogenesis; GO:0009733,response to auxin	PF05703.11:Auxin canalisation
gene-LOC100278922	NC_050102.1	167216357	167217116	-	5.22	16.73	9.83	4.36	5.42	4.43	-1.312	0.00166899	0.045919	down	--	uncharacterized protein LOC100278922 [Zea mays]	--	SubName: Full=Uncharacterized protein {ECO:0000313|EMBL:ONM58721.1, ECO:0000313|EnsemblPlants:Zm00001d021816_P001};	--	--	--
gene-LOC100278951	NC_050099.1	129351703	129352488	-	2.17	2.48	2.83	13.16	12.98	20.38	2.488	2.10595e-08	4.05966e-06	up	--	uncharacterized protein LOC100278951 [Zea mays]	--	SubName: Full=Uncharacterized protein {ECO:0000313|EMBL:AQK53169.1, ECO:0000313|EnsemblPlants:Zm00001d050864_P001};	--	--	--
gene-LOC100279009	NC_050098.1	140873511	140874073	+	0.24	0.25	0.42	4.94	3.99	7.88	4.076	1.40272e-07	2.15427e-05	up	--	hypothetical protein [Zea mays]	--	SubName: Full=Uncharacterized protein {ECO:0000313|EMBL:ACG48439.1};	--	--	--
gene-LOC100279169	NC_050103.1	37470656	37471449	+	0.28	1.33	0.54	4.88	7.85	6.86	3.057	7.87776e-08	1.28368e-05	up	--	uncharacterized protein LOC100279169 [Zea mays]	--	SubName: Full=DUF4228 domain protein {ECO:0000313|EMBL:AQK91344.1};	--	--	PF14009.6:Domain of unknown function (DUF4228)
gene-LOC100279283	NC_050097.1	3503139	3505548	+	2	1.57	0.99	35.3	28.53	59.67	4.566	5.05446e-15	4.80891e-12	up	K01193 beta-fructofuranosidase [EC:3.2.1.26] | (RefSeq) LOW QUALITY PROTEIN: beta-fructofuranosidase, insoluble isoenzyme 5-like (A)	beta-fructofuranosidase, insoluble isoenzyme 7 [Zea mays]	RecName: Full=Beta-fructofuranosidase, insoluble isoenzyme 7; EC=3.2.1.26; AltName: Full=Cell wall beta-fructosidase 7; AltName: Full=Invertase 7; AltName: Full=OsCIN7; AltName: Full=Sucrose hydrolase 7; Flags: Precursor;	SubName: Full=Uncharacterized protein {ECO:0000313|EMBL:ACL52570.1};	Beta-fructofuranosidase (invertase)	GO:0048046,apoplast; GO:0005618,cell wall; GO:0004575,sucrose alpha-glucosidase activity; GO:0005975,carbohydrate metabolic process	PF00251.20:Glycosyl hydrolases family 32 N-terminal domain
gene-LOC100279339	NC_050098.1	57627870	57631165	-	13.2	16.3	16.49	40.38	36.83	42.36	1.193	2.38987e-05	0.00166243	up	K08678 UDP-glucuronate decarboxylase [EC:4.1.1.35] | (RefSeq) pco089743; uncharacterized protein LOC100279339 (A)	UDP-glucuronic acid decarboxylase 4 [Zea mays]	RecName: Full=UDP-glucuronic acid decarboxylase 4; EC=4.1.1.35; AltName: Full=UDP-XYL synthase 4; AltName: Full=UDP-glucuronate decarboxylase 4; Short=UGD; Short=UXS-4;	SubName: Full=UDP-glucuronic acid decarboxylase 4 {ECO:0000313|EMBL:ONM31756.1};	dTDP-glucose 4-6-dehydratase/UDP-glucuronic acid decarboxylase	GO:0032580,Golgi cisterna membrane; GO:0016021,integral component of membrane; GO:0070403,NAD+ binding; GO:0048040,UDP-glucuronate decarboxylase activity; GO:0033320,UDP-D-xylose biosynthetic process	PF16363.5:GDP-mannose 4,6 dehydratase
gene-LOC100279371	NC_050102.1	146096859	146098574	+	0	0	0	0.25	0.49	0.28	5.617	0.000118781	0.00614617	up	K13691 pathogen-inducible salicylic acid glucosyltransferase [EC:2.4.1.-] | (RefSeq) uncharacterized protein LOC100279371 (A)	uncharacterized protein LOC100279371 [Zea mays]	RecName: Full=UDP-glycosyltransferase 79 {ECO:0000305}; Short=OsUGT79 {ECO:0000303|PubMed:26197338}; EC=2.4.1.- {ECO:0000269|PubMed:26197338}; AltName: Full=Deoxynivalenol-UDP-glucosyltransferase {ECO:0000303|PubMed:27715009};	RecName: Full=Glycosyltransferase {ECO:0000256|RuleBase:RU362057}; EC=2.4.1.- {ECO:0000256|RuleBase:RU362057};	UDP-glucuronosyl and UDP-glucosyl transferase	GO:0043231,intracellular membrane-bounded organelle; GO:0000166,nucleotide binding; GO:0080043,quercetin 3-O-glucosyltransferase activity; GO:0080044,quercetin 7-O-glucosyltransferase activity; GO:0008194,UDP-glycosyltransferase activity; GO:0098754,detoxification; GO:0008152,metabolic process	PF00201.18:UDP-glucoronosyl and UDP-glucosyl transferase
gene-LOC100279449	NC_050103.1	152974924	152977617	-	0.41	1	0.44	7.72	5.06	9.08	3.436	1.18056e-10	3.8263e-08	up	K12835 ATP-dependent RNA helicase DDX42 [EC:3.6.4.13] | (RefSeq) DEAD-box ATP-dependent RNA helicase 24 isoform X1 (A)	putative WRKY DNA-binding domain superfamily protein [Zea mays]	RecName: Full=Probable WRKY transcription factor 28; AltName: Full=WRKY DNA-binding protein 28;	SubName: Full=Putative WRKY transcription factor 71 {ECO:0000313|EMBL:AQK97130.1};	--	GO:0005634,nucleus; GO:0003700,DNA-binding transcription factor activity; GO:0043565,sequence-specific DNA binding; GO:0006351,transcription, DNA-templated	PF03106.15:WRKY DNA -binding domain
gene-LOC100279462	NC_050102.1	55719021	55720387	+	3.75	9.34	10.48	22.06	20.59	26.21	1.439	0.000405343	0.0161188	up	K19747 BAHD acyltransferase [EC:2.3.1.-] | (RefSeq) BAHD acyltransferase DCR (A)	uncharacterized protein LOC100279462 [Zea mays]	RecName: Full=Protein SRC2 homolog {ECO:0000305}; Short=AtSRC2 {ECO:0000303|PubMed:16227454};	SubName: Full=Calcium-dependent lipid-binding (CaLB domain) family protein {ECO:0000313|EMBL:ONM53685.1};	--	GO:0005783,endoplasmic reticulum; GO:0005789,endoplasmic reticulum membrane; GO:0016021,integral component of membrane; GO:0005886,plasma membrane; GO:0000326,protein storage vacuole; GO:0032586,protein storage vacuole membrane; GO:0006623,protein targeting to vacuole	PF00168.30:C2 domain
gene-LOC100279536	NC_050103.1	173687433	173689371	-	2.2	5.5	1.97	21.07	10.38	26.61	2.483	3.62577e-05	0.0023659	up	K13260 isoflavone/4'-methoxyisoflavone 2'-hydroxylase [EC:1.14.14.90 1.14.14.89] | (RefSeq) cytochrome P450 81E8-like (A)	putative cytochrome P450 superfamily protein [Zea mays]	RecName: Full=Isoflavone 2'-hydroxylase; EC=1.14.13.89; AltName: Full=CYP GE-3; AltName: Full=Cytochrome P450 81E1; AltName: Full=Cytochrome P450 91A4;	SubName: Full=Cytochrome P450 CYP81A1 {ECO:0000313|EMBL:ACG29835.1}; SubName: Full=Cytochrome P450 family 81 subfamily D polypeptide 8 {ECO:0000313|EMBL:AQK99338.1};	Cytochrome P450 CYP2 subfamily	GO:0016020,membrane; GO:0020037,heme binding; GO:0005506,iron ion binding; GO:0033773,isoflavone 2'-hydroxylase activity	PF00067.22:Cytochrome P450
gene-LOC100279537	NC_050098.1	225397287	225402604	+	0.66	1.63	0.87	5.69	3.98	9.3	2.503	1.1331e-05	0.000891189	up	K13422 transcription factor MYC2 | (RefSeq) transcription factor MYC2 (A)	putative HLH DNA-binding domain superfamily protein [Zea mays]	RecName: Full=Putative transcription factor bHLH041; AltName: Full=Basic helix-loop-helix protein 41; Short=AtbHLH41; Short=bHLH 41; AltName: Full=Transcription factor EN 51; AltName: Full=bHLH transcription factor bHLH041;	SubName: Full=BHLH transcription factor {ECO:0000313|EMBL:AIB05509.1}; SubName: Full=Putative transcription factor bHLH041 {ECO:0000313|EMBL:ONM40612.1};	--	GO:0005634,nucleus; GO:0003677,DNA binding; GO:0003700,DNA-binding transcription factor activity; GO:0046983,protein dimerization activity; GO:0006355,regulation of transcription, DNA-templated; GO:0010200,response to chitin; GO:0006351,transcription, DNA-templated	PF00010.26:Helix-loop-helix DNA-binding domain
gene-LOC100279545	NC_050104.1	150831591	150834836	+	2.95	3.45	2.97	12.66	14.41	22.2	2.239	4.19091e-07	5.37421e-05	up	--	uncharacterized protein LOC100279545 [Zea mays]	RecName: Full=Probable inactive poly [ADP-ribose] polymerase SRO1; AltName: Full=Protein SIMILAR TO RCD ONE 1;	SubName: Full=Putative inactive poly [ADP-ribose] polymerase SRO1 {ECO:0000313|EMBL:AQL08286.1};	--	GO:0016363,nuclear matrix; GO:0003950,NAD+ ADP-ribosyltransferase activity; GO:0009793,embryo development ending in seed dormancy; GO:0010102,lateral root morphogenesis; GO:0048573,photoperiodism, flowering; GO:0006970,response to osmotic stress; GO:0006979,response to oxidative stress; GO:0009651,response to salt stress	PF12174.8:RCD1-SRO-TAF4 (RST) plant domain
gene-LOC100279558	NC_050098.1	97317918	97321673	+	0.04	0.67	0.31	7.17	3.03	5.49	3.88	2.83965e-07	3.87744e-05	up	K04121 ent-kaurene synthase [EC:4.2.3.19] | (RefSeq) uncharacterized LOC100279558 (A)	kaurene synthase4 [Zea mays]	RecName: Full=Ent-pimara-8(14),15-diene synthase; EC=4.2.3.30; AltName: Full=Ent-kaurene synthase-like 5; Short=OsKS5; Short=OsKSL5; AltName: Full=Ent-kaurene synthase-like 6; Short=OsKS6;	SubName: Full=Kaurene synthase4 {ECO:0000313|EMBL:ONM32346.1};	--	GO:0034282,ent-pimara-8(14),15-diene synthase activity; GO:0000287,magnesium ion binding; GO:0010333,terpene synthase activity; GO:0006952,defense response; GO:0008152,metabolic process	PF03936.16:Terpene synthase family, metal binding domain
gene-LOC100279577	NC_050102.1	169162379	169164599	-	0.05	0.03	0.06	0.62	0.38	0.65	3.391	5.43429e-05	0.0032577	up	K01176 alpha-amylase [EC:3.2.1.1] | (RefSeq) lectin-domain containing receptor kinase VI.3-like (A)	putative lectin-like receptor protein kinase family protein precursor [Zea mays]	RecName: Full=L-type lectin-domain containing receptor kinase IV.2 {ECO:0000303|PubMed:19773388}; Short=Arabidopsis thaliana lectin-receptor kinase a4 {ECO:0000303|PubMed:19773388}; Short=AthlecRK-a4 {ECO:0000303|Ref.6}; Short=LecRK-IV.2 {ECO:0000303|PubMed:19773388}; EC=2.7.11.1 {ECO:0000255|PROSITE-ProRule:PRU00159}; AltName: Full=Protein SMALL, GLUED-TOGETHER, AND COLLAPSED POLLEN {ECO:0000303…	SubName: Full=L-type lectin-domain containing receptor kinase V.9 {ECO:0000313|EMBL:ONM59019.1};	--	GO:0016021,integral component of membrane; GO:0005886,plasma membrane; GO:0005524,ATP binding; GO:0030246,carbohydrate binding; GO:0004674,protein serine/threonine kinase activity; GO:0042742,defense response to bacterium; GO:0009555,pollen development	PF00139.19:Legume lectin domain
gene-LOC100279578	NC_050102.1	93421327	93422920	+	0.14	0.77	0.5	3.93	4.95	4.81	3.155	6.78746e-10	1.94359e-07	up	K14497 protein phosphatase 2C [EC:3.1.3.16] | (RefSeq) uncharacterized protein LOC100279578 (A)	uncharacterized protein LOC100279578 [Zea mays]	RecName: Full=Probable protein phosphatase 2C 68; Short=OsPP2C68; EC=3.1.3.16;	SubName: Full=2C-type protein phosphatase protein {ECO:0000313|EMBL:AIG52096.1}; SubName: Full=Protein phosphatase homolog6 {ECO:0000313|EMBL:ONM54279.1};	Serine/threonine protein phosphatase	GO:0046872,metal ion binding; GO:0004722,protein serine/threonine phosphatase activity	PF00481.21:Protein phosphatase 2C
gene-LOC100279598	NC_050096.1	229296918	229298571	-	9.03	7.15	5.2	31.57	25.1	52.04	2.151	0.000105138	0.00554921	up	K21995 unsaturated fatty acid epoxidase [EC:1.14.-.-] | (RefSeq) cytochrome P450 77A3-like (A)	putative cytochrome P450 superfamily protein [Zea mays]	RecName: Full=Cytochrome P450 89A2; EC=1.14.-.-; AltName: Full=ATH 6-1; AltName: Full=CYPLXXXIX;	SubName: Full=Uncharacterized protein {ECO:0000313|EMBL:ACN34566.1};	Cytochrome P450 CYP2 subfamily	GO:0016021,integral component of membrane; GO:0016020,membrane; GO:0020037,heme binding; GO:0005506,iron ion binding; GO:0016709,oxidoreductase activity, acting on paired donors, with incorporation or reduction of molecular oxygen, NAD(P)H as one donor, and incorporation of one atom of oxygen; GO:0044550,secondary metabolite biosynthetic process	PF00067.22:Cytochrome P450
gene-LOC100279614	NC_050103.1	123525910	123529382	+	5.03	4.9	3.99	1.46	1.47	1.76	-1.79	7.04783e-06	0.000611378	down	K19891 glucan endo-1,3-beta-glucosidase 1/2/3 [EC:3.2.1.39] | (RefSeq) glucan endo-1,3-beta-glucosidase 3 isoform X2 (A)	putative O-Glycosyl hydrolase superfamily protein isoform X1 [Zea mays]	RecName: Full=Putative glucan endo-1,3-beta-glucosidase GVI; EC=3.2.1.39; AltName: Full=(1->3)-beta-glucan endohydrolase GVI; AltName: Full=(1->3)-beta-glucanase isoenzyme GVI; AltName: Full=Beta-1,3-endoglucanase GVI; Flags: Precursor; Fragment;	SubName: Full=Glucan endo-1,3-beta-glucosidase GVI {ECO:0000313|EMBL:ACG35188.1};	--	GO:0042973,glucan endo-1,3-beta-D-glucosidase activity; GO:0005975,carbohydrate metabolic process; GO:0006952,defense response	PF00332.18:Glycosyl hydrolases family 17
gene-LOC100279712	NC_050100.1	10570808	10574328	-	22.55	15.85	7.69	97.84	124.59	229.37	3.074	3.59659e-06	0.000341086	up	K01054 acylglycerol lipase [EC:3.1.1.23] | (RefSeq) csu131; uncharacterized protein LOC100279712 (A)	alpha/beta-Hydrolases superfamily protein [Zea mays]	RecName: Full=Caffeoylshikimate esterase; EC=3.1.1.-; AltName: Full=Lysophospholipase 2; Short=LysoPL2;	SubName: Full=Alpha/beta-Hydrolases superfamily protein {ECO:0000313|EMBL:AQK63395.1};	Lysophospholipase	GO:0005783,endoplasmic reticulum; GO:0005794,Golgi apparatus; GO:0005886,plasma membrane; GO:0009506,plasmodesma; GO:0003846,2-acylglycerol O-acyltransferase activity; GO:0090430,caffeoyl-CoA: alcohol caffeoyl transferase activity; GO:0016787,hydrolase activity; GO:0004622,lysophospholipase activity; GO:0009809,lignin biosynthetic process; GO:0006629,lipid metabolic process; GO:0046686,response t…	PF12146.8:Serine aminopeptidase, S33
gene-LOC100279723	NC_050097.1	191246619	191250666	+	21.6	27.33	26.21	13.85	12.52	9.95	-1.275	3.74896e-12	1.75511e-09	down	--	uncharacterized protein LOC100279723 isoform X1 [Zea mays]	RecName: Full=Remorin 4.1 {ECO:0000305}; Short=OsREM4.1 {ECO:0000303|PubMed:17984200}; AltName: Full=Remorin group 4 member 1 {ECO:0000303|PubMed:17984200};	SubName: Full=Remorin family protein {ECO:0000313|EMBL:ONM22304.1};	--	GO:0005886,plasma membrane; GO:0009738,abscisic acid-activated signaling pathway; GO:1900458,negative regulation of brassinosteroid mediated signaling pathway	PF03763.13:Remorin, C-terminal region
gene-LOC100279748	NC_050104.1	147964807	147969613	+	7.25	16.03	13.54	73.39	69.04	94.69	2.57	1.08275e-11	4.83856e-09	up	K01610 phosphoenolpyruvate carboxykinase (ATP) [EC:4.1.1.49] | (RefSeq) pck2; phosphoenolpyruvate carboxykinase homolog 2 (A)	phosphoenolpyruvate carboxykinase homolog2 [Zea mays]	RecName: Full=Phosphoenolpyruvate carboxykinase (ATP); Short=PEP carboxykinase; Short=PEPCK; EC=4.1.1.49;	SubName: Full=Phosphoenolpyruvate carboxykinase homolog2 {ECO:0000313|EMBL:AQL07951.1};	--	GO:0005737,cytoplasm; GO:0005524,ATP binding; GO:0004612,phosphoenolpyruvate carboxykinase (ATP) activity; GO:0006094,gluconeogenesis	PF01293.20:Phosphoenolpyruvate carboxykinase
gene-LOC100279840	NC_050096.1	7666141	7668471	-	0.03	0	0.15	0.7	4.01	1.07	4.722	7.34103e-06	0.000629408	up	K07408 cytochrome P450 family 1 subfamily A polypeptide 1 [EC:1.14.14.1] | (RefSeq) LOC109782368; cytochrome P450 78A9-like (A)	uncharacterized protein LOC100279840 [Zea mays]	RecName: Full=Cytochrome P450 78A6; EC=1.14.-.-; AltName: Full=Protein ENHANCER OF DA1-1;	SubName: Full=Uncharacterized protein {ECO:0000313|EMBL:ACL53602.1};	Cytochrome P450 CYP2 subfamily	GO:0016021,integral component of membrane; GO:0016020,membrane; GO:0020037,heme binding; GO:0005506,iron ion binding; GO:0016709,oxidoreductase activity, acting on paired donors, with incorporation or reduction of molecular oxygen, NAD(P)H as one donor, and incorporation of one atom of oxygen; GO:0040008,regulation of growth; GO:0044550,secondary metabolite biosynthetic process; GO:0048316,seed d…	PF00067.22:Cytochrome P450
gene-LOC100279937	NC_050102.1	170426607	170429167	+	0.58	0.92	0.45	2.2	1.69	3.19	1.714	0.00145465	0.0416943	up	K03063 26S proteasome regulatory subunit T3 | (RefSeq) 26S protease regulatory subunit 6B homolog (A)	putative phototropic-resoponsive NPH3 family protein [Zea mays]	RecName: Full=BTB/POZ domain-containing protein At5g48130;	SubName: Full=BTB/POZ domain-containing protein {ECO:0000313|EMBL:ONM59113.1};	--	GO:0016567,protein ubiquitination	PF03000.14:NPH3 family
gene-LOC100279957	NC_050101.1	19967418	19970504	-	2.55	3.95	2.43	11.2	9.51	14.01	1.798	1.04621e-05	0.000833969	up	K06883 uncharacterized protein | (RefSeq) LOW QUALITY PROTEIN: uncharacterized protein LOC104799061 (A)	putative DUF26-domain receptor-like protein kinase family protein precursor [Zea mays]	RecName: Full=Cysteine-rich receptor-like protein kinase 10 {ECO:0000305}; Short=Cysteine-rich RLK10 {ECO:0000305}; EC=2.7.11.- {ECO:0000305}; Flags: Precursor;	SubName: Full=Uncharacterized protein {ECO:0000313|EMBL:ACL53829.1};	--	GO:0016021,integral component of membrane; GO:0005886,plasma membrane; GO:0005524,ATP binding; GO:0004674,protein serine/threonine kinase activity; GO:0042742,defense response to bacterium; GO:0006468,protein phosphorylation	PF00069.25:Protein kinase domain
gene-LOC100279973	NC_050101.1	6082251	6084237	+	1.88	2.22	0.62	13.1	18.1	17.56	3.132	4.58463e-08	8.04875e-06	up	K13223 indole-2-monooxygenase [EC:1.14.14.153] | (RefSeq) LOC109757929; indole-2-monooxygenase-like (A)	uncharacterized protein LOC100279973 [Zea mays]	RecName: Full=indole-2-monooxygenase; EC=1.14.13.137; AltName: Full=Cytochrome P450 71C4; AltName: Full=Protein benzoxazineless 2;	SubName: Full=Cytochrome P450 71A26 {ECO:0000313|EMBL:AQK78034.1};	Cytochrome P450 CYP2 subfamily	GO:0016021,integral component of membrane; GO:0020037,heme binding; GO:0036190,indole-2-monooxygenase activity; GO:0005506,iron ion binding	PF00067.22:Cytochrome P450
gene-LOC100279981	NC_050105.1	138726155	138728788	+	4.84	8.35	9.14	3.94	3.43	4.37	-1.073	0.00130621	0.0385494	down	K01762 1-aminocyclopropane-1-carboxylate synthase [EC:4.4.1.14] | (RefSeq) acs7; 1-aminocyclopropane-1-carboxylate synthase 7 (A)	acc synthase [Zea mays]	RecName: Full=1-aminocyclopropane-1-carboxylate synthase; Short=ACC synthase; EC=4.4.1.14; AltName: Full=S-adenosyl-L-methionine methylthioadenosine-lyase;	SubName: Full=1-aminocyclopropane-1-carboxylate synthase7 {ECO:0000313|EMBL:AQK45412.1}; SubName: Full=Acc synthase {ECO:0000313|EMBL:AAR25559.1};	1-aminocyclopropane-1-carboxylate synthase, and related proteins	GO:0016847,1-aminocyclopropane-1-carboxylate synthase activity; GO:0030170,pyridoxal phosphate binding; GO:0009693,ethylene biosynthetic process; GO:0009835,fruit ripening	PF00155.21:Aminotransferase class I and II
gene-LOC100279995	NC_050100.1	18780311	18784415	-	1.96	1.88	1.36	4.43	5.27	5.14	1.28	0.00106246	0.0329732	up	K11968 ariadne-1 [EC:2.3.2.31] | (RefSeq) putative RING zinc finger domain superfamily protein (A)	putative RING zinc finger domain superfamily protein [Zea mays]	RecName: Full=Probable E3 ubiquitin-protein ligase ARI1; EC=2.3.2.27 {ECO:0000250|UniProtKB:Q9Y4X5}; AltName: Full=ARIADNE-like protein ARI1; AltName: Full=Protein ariadne homolog 1; AltName: Full=RING-type E3 ubiquitin transferase ARI1 {ECO:0000305};	RecName: Full=RING-type E3 ubiquitin transferase {ECO:0000256|SAAS:SAAS00970528}; EC=2.3.2.27 {ECO:0000256|SAAS:SAAS00970528};	Predicted E3 ubiquitin ligase	GO:0005737,cytoplasm; GO:0000151,ubiquitin ligase complex; GO:0046872,metal ion binding; GO:0031624,ubiquitin conjugating enzyme binding; GO:0061630,ubiquitin protein ligase activity; GO:0032436,positive regulation of proteasomal ubiquitin-dependent protein catabolic process; GO:0000209,protein polyubiquitination; GO:0042787,NA	PF01485.21:IBR domain, a half RING-finger domain
gene-LOC100280003	NC_050098.1	18105542	18107123	-	1.57	1.86	1.88	9.04	9.02	13.78	2.431	1.25251e-08	2.53025e-06	up	K06129 lysophospholipase III [EC:3.1.1.5] | (RefSeq) Lecithin:cholesterol acyltransferase (A)	uncharacterized protein LOC100280003 precursor [Zea mays]	RecName: Full=Lecithin-cholesterol acyltransferase-like 1; EC=2.3.1.-;	SubName: Full=Uncharacterized protein {ECO:0000313|EMBL:ACL53932.1};	Lecithin:cholesterol acyltransferase (LCAT)/Acyl-ceramide synthase	GO:0008374,O-acyltransferase activity; GO:0006629,lipid metabolic process	PF02450.15:Lecithin:cholesterol acyltransferase
gene-LOC100280082	NC_050102.1	173668043	173669314	-	2.25	2.1	1.97	22.35	23.03	49.81	3.773	1.53511e-11	6.6583e-09	up	K22312 hydroxyjasmonate sulfotransferase [EC:2.8.2.39] | (RefSeq) flavonol 4-sulfotransferase (A)	flavonol 4-sulfotransferase [Zea mays]	RecName: Full=Cytosolic sulfotransferase 5; Short=AtSOT5; EC=2.8.2.-; AltName: Full=Flavonoid 7-sulfotransferase 3a; Short=AtST3a;	RecName: Full=Sulfotransferase {ECO:0000256|RuleBase:RU361155}; EC=2.8.2.- {ECO:0000256|RuleBase:RU361155};	Sulfotransferase	GO:0005737,cytoplasm; GO:1990135,flavonoid sulfotransferase activity; GO:0008146,sulfotransferase activity; GO:0009812,flavonoid metabolic process	PF00685.27:Sulfotransferase domain
gene-LOC100280103	NC_050096.1	290038786	290040791	+	0.09	0.03	0.08	0.76	0.32	0.58	2.887	0.000732191	0.0254361	up	K00521 ferric-chelate reductase [EC:1.16.1.7] | (RefSeq) ferric reduction oxidase 7, chloroplastic-like (A)	putative NAC domain transcription factor superfamily protein isoform X1 [Zea mays]	RecName: Full=Transcription factor JUNGBRUNNEN 1; AltName: Full=NAC domain-containing protein 42; Short=ANAC042;	SubName: Full=Transcription factor JUNGBRUNNEN 1 {ECO:0000313|EMBL:ONM09914.1};	--	GO:0005634,nucleus; GO:0003677,DNA binding; GO:0003700,DNA-binding transcription factor activity; GO:0009718,anthocyanin-containing compound biosynthetic process; GO:0010120,camalexin biosynthetic process; GO:0042538,hyperosmotic salinity response; GO:0010150,leaf senescence; GO:1900056,negative regulation of leaf senescence; GO:0006561,proline biosynthetic process; GO:0006351,transcription, DNA-…	PF02365.15:No apical meristem (NAM) protein
gene-LOC100280109	NC_050097.1	21850946	21854027	-	0	0.03	0.06	0.87	1.04	1.25	4.966	8.29108e-07	9.55223e-05	up	K11996 adenylyltransferase and sulfurtransferase [EC:2.7.7.80 2.8.1.11] | (RefSeq) adenylyltransferase and sulfurtransferase MOCS3-2 (A)	uncharacterized protein LOC100280109 isoform X1 [Zea mays]	RecName: Full=Adenylyltransferase and sulfurtransferase MOCS3-2 {ECO:0000255|HAMAP-Rule:MF_03049}; AltName: Full=Molybdenum cofactor synthesis protein 3-2 {ECO:0000255|HAMAP-Rule:MF_03049}; Includes: RecName: Full=Molybdopterin-synthase adenylyltransferase 2 {ECO:0000255|HAMAP-Rule:MF_03049}; EC=2.7.7.80 {ECO:0000255|HAMAP-Rule:MF_03049}; AltName: Full=Adenylyltransferase MOCS3-2 {ECO:0000255|HAM…	SubName: Full=Adenylyltransferase and sulfurtransferase MOCS3 {ECO:0000313|EMBL:ONM15275.1};	Molybdopterin synthase sulfurylase	GO:0005829,cytosol; GO:0005524,ATP binding; GO:0046872,metal ion binding; GO:0061605,molybdopterin-synthase adenylyltransferase activity; GO:0061604,molybdopterin-synthase sulfurtransferase activity; GO:0004792,thiosulfate sulfurtransferase activity; GO:0008641,ubiquitin-like modifier activating enzyme activity; GO:0006777,Mo-molybdopterin cofactor biosynthetic process; GO:0002143,tRNA wobble pos…	PF00899.21:ThiF family
gene-LOC100280247	NC_050097.1	163462362	163463982	-	3.27	3.72	3.12	8.26	9.22	18.92	1.719	0.00147138	0.0419698	up	K00521 ferric-chelate reductase [EC:1.16.1.7] | (RefSeq) ferric reduction oxidase 7, chloroplastic-like (A)	putative NAC domain transcription factor superfamily protein [Zea mays]	RecName: Full=NAC domain-containing protein 67 {ECO:0000303|PubMed:15029955}; Short=ONAC067 {ECO:0000303|PubMed:15029955}; AltName: Full=OsNAC3 {ECO:0000303|PubMed:10660065};	SubName: Full=NAC domain-containing protein 2 {ECO:0000313|EMBL:ONM20617.1}; SubName: Full=NAC family protein {ECO:0000313|EMBL:ALB35041.1}; SubName: Full=NAC transcription factor {ECO:0000313|EMBL:AIB05175.1};	--	GO:0005634,nucleus; GO:0003677,DNA binding; GO:0006355,regulation of transcription, DNA-templated; GO:0006351,transcription, DNA-templated	PF02365.15:No apical meristem (NAM) protein
gene-LOC100280265	NC_050096.1	68197454	68201466	+	2.85	4.68	4.51	18.72	12.89	25.73	2.139	1.35257e-06	0.000144016	up	K01115 phospholipase D1/2 [EC:3.1.4.4] | (RefSeq) phospholipase D alpha 1-like isoform X1 (A)	phospholipase D family protein isoform X2 [Zea mays]	RecName: Full=Phospholipase D alpha 1; Short=PLD alpha 1; EC=3.1.4.4; AltName: Full=Choline phosphatase 1; AltName: Full=Phosphatidylcholine-hydrolyzing phospholipase D 1; Flags: Precursor;	RecName: Full=Phospholipase D {ECO:0000256|PIRNR:PIRNR036470}; EC=3.1.4.4 {ECO:0000256|PIRNR:PIRNR036470};	Phospholipase D1	GO:0016020,membrane; GO:0005509,calcium ion binding; GO:0070290,N-acylphosphatidylethanolamine-specific phospholipase D activity; GO:0004630,phospholipase D activity; GO:0016042,lipid catabolic process; GO:0046470,phosphatidylcholine metabolic process	PF12357.8:Phospholipase D C terminal
gene-LOC100280353	NC_050101.1	174115367	174118746	-	0.87	2.52	2.31	5.42	6.76	6.7	1.598	7.60825e-05	0.0042832	up	K18693 diacylglycerol diphosphate phosphatase / phosphatidate phosphatase [EC:3.1.3.81 3.1.3.4] | (RefSeq) uncharacterized protein LOC100280353 (A)	uncharacterized protein LOC100280353 [Zea mays]	RecName: Full=Lipid phosphate phosphatase 2; Short=AtLPP2; EC=3.1.3.-; AltName: Full=Phosphatidic acid phosphatase 2; Short=AtPAP2; AltName: Full=Prenyl diphosphate phosphatase;	SubName: Full=Lipid phosphate phosphatase 2 {ECO:0000313|EMBL:AQK88213.1};	Lipid phosphate phosphatase and related enzymes of the PAP2 family	GO:0005887,integral component of plasma membrane; GO:0005886,plasma membrane; GO:0003993,acid phosphatase activity; GO:0008195,phosphatidate phosphatase activity	PF01569.21:PAP2 superfamily
gene-LOC100280431	NC_050101.1	153338322	153341337	+	0.77	0.89	0.34	3.19	1.68	3.59	1.89	0.00167717	0.0460153	up	K06901 putative MFS transporter, AGZA family, xanthine/uracil permease | (RefSeq) uncharacterized LOC100280431 (A)	uncharacterized protein LOC100280431 [Zea mays]	RecName: Full=Adenine/guanine permease AZG1; AltName: Full=AzgA-homolog protein; AltName: Full=Protein AZAGUANINE RESISTANT 1; Short=AtAzg1;	SubName: Full=Uncharacterized protein {ECO:0000313|EMBL:ACL54824.1, ECO:0000313|EnsemblPlants:Zm00001d000434_P001};	--	GO:0016021,integral component of membrane; GO:0005345,purine nucleobase transmembrane transporter activity; GO:0005215,transporter activity; GO:0015853,adenine transport; GO:0015854,guanine transport; GO:0006863,purine nucleobase transport	PF00860.20:Permease family
gene-LOC100280443	NC_050102.1	27796372	27800908	-	1.02	1.09	3.11	0.76	0.62	0.16	-2.01	0.00170206	0.046439	down	K21398 natural resistance-associated macrophage protein 2 | (RefSeq) metal transporter Nramp3 (A)	metal transporter Nramp5 [Zea mays]	RecName: Full=Metal transporter Nramp5;	SubName: Full=Metal transporter Nramp6 {ECO:0000313|EMBL:ONM52708.1};	Mn2+ and Fe2+ transporters of the NRAMP family	GO:0016021,integral component of membrane; GO:0046873,metal ion transmembrane transporter activity; GO:0055072,iron ion homeostasis	PF01566.18:Natural resistance-associated macrophage protein
gene-LOC100280445	NC_050097.1	215937137	215939377	-	0.26	0.42	0.81	1.76	2.38	1.82	1.817	3.67046e-05	0.00238977	up	K14487 auxin responsive GH3 gene family | (RefSeq) GH3; indole-3-acetic acid amido synthetase (A)	indole-3-acetic acid amido synthetase [Zea mays]	RecName: Full=Probable indole-3-acetic acid-amido synthetase GH3.8; EC=6.3.2.-; AltName: Full=Auxin-responsive GH3-like protein 8; Short=OsGH3-8;	SubName: Full=Indole-3-acetic acid amido synthetase {ECO:0000313|EMBL:ONM24922.1};	--	GO:0016874,ligase activity	PF03321.13:GH3 auxin-responsive promoter
gene-LOC100280478	NC_050102.1	10733702	10734859	-	1.86	3.61	3.14	24.99	27.95	37.79	3.273	5.96214e-16	7.64554e-13	up	K01183 chitinase [EC:3.2.1.14] | (RefSeq) xylanase inhibitor protein 1 precursor (A)	xylanase inhibitor protein 1 precursor [Zea mays]	RecName: Full=Xylanase inhibitor protein 1; AltName: Full=Class III chitinase homolog a; AltName: Full=RIXI protein; Flags: Precursor;	SubName: Full=Xylanase inhibitor protein 1 {ECO:0000313|EMBL:ONM51743.1};	Chitinase	GO:0005576,extracellular region; GO:0008061,chitin binding; GO:0004568,chitinase activity; GO:0005975,carbohydrate metabolic process; GO:0006032,chitin catabolic process; GO:0006952,defense response	PF00704.28:Glycosyl hydrolases family 18
gene-LOC100280609	NC_050099.1	168726190	168726873	-	26.84	113.83	111.81	38.43	34.09	12.36	-1.764	0.00117516	0.035843	down	--	pollen-specific arabinogalacta protein BAN102 precursor [Zea mays]	RecName: Full=Arabinogalactan peptide 23; Short=AG-peptide 23; Flags: Precursor;	SubName: Full=Pollen-specific arabinogalacta protein BAN102 {ECO:0000313|EMBL:ACG24983.1};	--	GO:0031225,anchored component of membrane; GO:0005886,plasma membrane	--
gene-LOC100280702	NC_050105.1	55395917	55399738	+	3.18	5.36	7.05	3.15	3.13	1.51	-1.22	0.000192672	0.00893499	down	K01534 Cd2+/Zn2+-exporting ATPase [EC:3.6.3.3 3.6.3.5] | (RefSeq) cadmium/zinc-transporting ATPase HMA3-like (A)	ATP binding protein isoform X1 [Zea mays]	RecName: Full=Probable receptor-like serine/threonine-protein kinase At5g57670; EC=2.7.11.1;	SubName: Full=Putative receptor-like serine/threonine-protein kinase {ECO:0000313|EMBL:AQK40782.1};	Serine/threonine protein kinase	GO:0005886,plasma membrane; GO:0005524,ATP binding; GO:0004675,transmembrane receptor protein serine/threonine kinase activity; GO:0007166,cell surface receptor signaling pathway; GO:0006468,protein phosphorylation	PF07714.17:Protein tyrosine kinase
gene-LOC100280765	NC_050105.1	139740942	139742097	-	4.09	8.12	6.93	3.68	4.15	2.98	-1.017	0.000192532	0.00893499	down	K09419 heat shock transcription factor, other eukaryote | (RefSeq) heat shock factor protein 4 (A)	HSF transcription factor, partial [Zea mays]	RecName: Full=Heat stress transcription factor B-2a; AltName: Full=Heat stress transcription factor 1; Short=rHsf1; AltName: Full=Heat stress transcription factor 14; Short=OsHsf-14;	SubName: Full=Heat stress transcription factor B-2b {ECO:0000313|EMBL:AQK45456.1};	Heat shock transcription factor	GO:0005737,cytoplasm; GO:0005634,nucleus; GO:0003700,DNA-binding transcription factor activity; GO:0043565,sequence-specific DNA binding; GO:0006351,transcription, DNA-templated	PF00447.17:HSF-type DNA-binding
gene-LOC100280792	NC_050102.1	172867131	172869516	-	4.8	5.69	4.24	13.4	15.72	11.19	1.211	9.95922e-06	0.000800374	up	--	ninja-family protein 5 [Zea mays]	RecName: Full=Ninja-family protein 5;	SubName: Full=Ninja-family protein 5 {ECO:0000313|EMBL:ONM59448.1};	--	GO:0005634,nucleus; GO:0007165,signal transduction	PF07897.11:Ethylene-responsive binding factor-associated repression
gene-LOC100280834	NC_050104.1	129428986	129430886	-	16.67	29.14	24.38	12.54	12.67	11.73	-1.109	3.57385e-06	0.000341086	down	K19892 glucan endo-1,3-beta-glucosidase 4 [EC:3.2.1.39] | (RefSeq) glucan endo-1,3-beta-glucosidase 4-like (A)	glucan endo-1,3-beta-glucosidase 4 precursor [Zea mays]	RecName: Full=PLASMODESMATA CALLOSE-BINDING PROTEIN 3; Short=AtPDCB3; Flags: Precursor;	SubName: Full=Glucan endo-1,3-beta-glucosidase 4 {ECO:0000313|EMBL:ACG26226.1};	--	GO:0031225,anchored component of membrane; GO:0046658,anchored component of plasma membrane; GO:0009506,plasmodesma; GO:0001872,(1->3)-beta-D-glucan binding; GO:0004553,hydrolase activity, hydrolyzing O-glycosyl compounds; GO:0030247,polysaccharide binding	PF07983.13:X8 domain
gene-LOC100280912	NC_050100.1	88064981	88066139	+	1.52	4.04	1.43	10.42	8.59	18.92	2.357	0.000119744	0.00617433	up	--	VQ motif family protein [Zea mays]	RecName: Full=VQ motif-containing protein 22 {ECO:0000303|PubMed:22535423}; Short=AtVQ22 {ECO:0000303|PubMed:22535423};	SubName: Full=VQ motif family protein {ECO:0000313|EMBL:ACG26692.1};	--	GO:0005634,nucleus	PF05678.14:VQ motif
gene-LOC100280929	NC_050099.1	222112768	222115399	+	0.47	1.32	0.48	2.33	3.41	3.34	1.852	0.000642777	0.0230996	up	K09286 EREBP-like factor | (RefSeq) ethylene-responsive transcription factor RAP2-3 isoform X1 (A)	Putative AP2/EREBP transcription factor superfamily protein [Zea mays]	RecName: Full=Ethylene-responsive transcription factor ERF114 {ECO:0000303|PubMed:16407444}; AltName: Full=ERF bud enhancer {ECO:0000303|PubMed:23616605};	SubName: Full=Putative AP2/EREBP transcription factor superfamily protein {ECO:0000313|EMBL:AQK58911.1};	--	GO:0005634,nucleus; GO:0003700,DNA-binding transcription factor activity; GO:0043565,sequence-specific DNA binding; GO:0050832,defense response to fungus; GO:0009873,ethylene-activated signaling pathway; GO:0007275,multicellular organism development; GO:0006351,transcription, DNA-templated	PF00847.20:AP2 domain
gene-LOC100280936	NC_050102.1	142057701	142059560	-	18.97	29.42	39.41	16.9	16.05	10.9	-1.202	1.1008e-06	0.000120695	down	K08679 UDP-glucuronate 4-epimerase [EC:5.1.3.6] | (RefSeq) protein capI (A)	protein capI [Zea mays]	RecName: Full=UDP-glucuronate 4-epimerase 6; EC=5.1.3.6; AltName: Full=UDP-glucuronic acid epimerase 6; Short=AtUGlcAE2;	SubName: Full=Protein capI {ECO:0000313|EMBL:ACG26819.1};	UDP-glucose 4-epimerase/UDP-sulfoquinovose synthase	GO:0005768,endosome; GO:0005794,Golgi apparatus; GO:0032580,Golgi cisterna membrane; GO:0016021,integral component of membrane; GO:0005802,trans-Golgi network; GO:0050378,UDP-glucuronate 4-epimerase activity; GO:0050832,defense response to fungus; GO:0050829,defense response to Gram-negative bacterium; GO:0033481,galacturonate biosynthetic process	PF01370.21:NAD dependent epimerase/dehydratase family
gene-LOC100280939	NC_050102.1	181939906	181941508	+	30.64	40.46	29.44	9.06	7.27	11.06	-2.049	1.23187e-07	1.93259e-05	down	K12761 carbon catabolite-derepressing protein kinase [EC:2.7.11.1] | (RefSeq) CBL-interacting serine/threonine-protein kinase 14-like (A)	CBL-interacting serine/threonine-protein kinase 11 [Zea mays]	RecName: Full=CBL-interacting protein kinase 29; EC=2.7.11.1; AltName: Full=OsCIPK29;	RecName: Full=Non-specific serine/threonine protein kinase {ECO:0000256|SAAS:SAAS00351747}; EC=2.7.11.1 {ECO:0000256|SAAS:SAAS00351747};	Serine/threonine protein kinase	GO:0005622,intracellular; GO:0005524,ATP binding; GO:0004674,protein serine/threonine kinase activity; GO:0035556,intracellular signal transduction; GO:0018105,peptidyl-serine phosphorylation; GO:0018107,peptidyl-threonine phosphorylation	PF00069.25:Protein kinase domain
gene-LOC100280952	NC_050098.1	1230182	1232186	+	0.21	0.29	0.18	1.84	3.58	0.82	2.911	1.19776e-05	0.000934573	up	--	S-type anion channel SLAH1 [Zea mays]	RecName: Full=S-type anion channel SLAH1; AltName: Full=SLAC1-homolog protein 1;	SubName: Full=S-type anion channel SLAH1 {ECO:0000313|EMBL:ONM28110.1};	--	GO:0016021,integral component of membrane; GO:0005886,plasma membrane; GO:0008308,voltage-gated anion channel activity; GO:0006873,cellular ion homeostasis; GO:0006821,chloride transport; GO:1901529,positive regulation of anion channel activity; GO:0009651,response to salt stress; GO:0009414,response to water deprivation	PF03595.17:Voltage-dependent anion channel
gene-LOC100280970	NC_050096.1	233823908	233826715	-	9.24	11.17	4.67	98.17	80.42	152.68	3.547	1.92153e-10	5.90351e-08	up	K07407 alpha-galactosidase [EC:3.2.1.22] | (RefSeq) alpha-galactosidase precursor (A)	alpha-galactosidase precursor [Zea mays]	RecName: Full=Alpha-galactosidase 1 {ECO:0000303|PubMed:15034167}; Short=AtAGAL1 {ECO:0000303|PubMed:15034167}; EC=3.2.1.22 {ECO:0000250|UniProtKB:Q9FXT4}; AltName: Full=Alpha-D-galactoside galactohydrolase 1 {ECO:0000305}; AltName: Full=Melibiase 1 {ECO:0000305}; Flags: Precursor;	RecName: Full=Alpha-galactosidase {ECO:0000256|RuleBase:RU361168}; EC=3.2.1.22 {ECO:0000256|RuleBase:RU361168}; AltName: Full=Melibiase {ECO:0000256|RuleBase:RU361168};	Alpha-D-galactosidase (melibiase)	GO:0048046,apoplast; GO:0005618,cell wall; GO:0009505,plant-type cell wall; GO:0052692,raffinose alpha-galactosidase activity; GO:0005975,carbohydrate metabolic process; GO:0071555,cell wall organization	PF16499.5:Alpha galactosidase A
gene-LOC100280976	NC_050102.1	1243536	1244695	+	0.6	0.93	0.37	0.15	0.1	0.05	-2.909	0.00132733	0.0389149	down	--	Uclacyanin-2 [Zea mays]	RecName: Full=Uclacyanin 1 {ECO:0000303|PubMed:9761472}; Flags: Precursor;	SubName: Full=Uclacyanin-2 {ECO:0000313|EMBL:ONM50898.1};	--	GO:0031225,anchored component of membrane; GO:0046658,anchored component of plasma membrane; GO:0009055,electron transfer activity; GO:0046872,metal ion binding	PF02298.17:Plastocyanin-like domain
gene-LOC100280981	NC_050105.1	22620573	22621600	-	0.3	2.32	2.28	45.98	28.38	59.47	4.738	1.57612e-12	7.879e-10	up	K05387 glutamate receptor, ionotropic, plant | (RefSeq) LOW QUALITY PROTEIN: glutamate receptor 2.3-like (A)	pathogenesis-related protein 10 [Zea mays]	RecName: Full=Pathogenesis-related protein 1; Short=AOPR1;	SubName: Full=Pathogenesis-related protein 10 {ECO:0000313|EMBL:ACG27159.1}; SubName: Full=Pathogenesis-related protein STH-21 {ECO:0000313|EMBL:AQK40151.1};	--	GO:0005737,cytoplasm; GO:0006952,defense response; GO:0009607,response to biotic stimulus	PF00407.19:Pathogenesis-related protein Bet v I family
gene-LOC100281009	NC_050099.1	28861279	28862062	-	1.86	2.54	2.71	18.73	11.68	20.28	2.682	1.05863e-09	2.91806e-07	up	--	uncharacterized protein LOC100285882 [Zea mays]	--	SubName: Full=Adhesive/proline-rich protein {ECO:0000313|EMBL:ACG46587.1};	--	--	PF12734.7:Cysteine-rich TM module stress tolerance
gene-LOC100281016	NC_050097.1	228695522	228696715	+	2.26	2.57	2.3	17.9	20.1	35.03	3.216	1.65102e-10	5.18032e-08	up	K17279 receptor expression-enhancing protein 5/6 | (RefSeq) si603006c09; uncharacterized protein LOC100281016 (A)	uncharacterized protein LOC100281016 [Zea mays]	RecName: Full=Protein HVA22;	RecName: Full=HVA22-like protein {ECO:0000256|RuleBase:RU362006};	Protein involved in membrane traffic (YOP1/TB2/DP1/HVA22 family)	GO:0005783,endoplasmic reticulum; GO:0005794,Golgi apparatus; GO:0016021,integral component of membrane; GO:0009737,response to abscisic acid; GO:0006950,response to stress	PF03134.19:TB2/DP1, HVA22 family
gene-LOC100281047	NC_050096.1	170700238	170707124	+	1.13	1.78	1.07	6.56	4.98	7.86	2.128	5.4676e-07	6.67236e-05	up	K05391 cyclic nucleotide gated channel, plant | (RefSeq) cyclic nucleotide-gated ion channel 1-like (A)	WAK-like kinase isoform X1 [Zea mays]	RecName: Full=Wall-associated receptor kinase-like 14; EC=2.7.11.-; Flags: Precursor;	SubName: Full=WAK-like kinase {ECO:0000313|EMBL:ONM01778.1};	Serine/threonine protein kinase	GO:0016021,integral component of membrane; GO:0005886,plasma membrane; GO:0005524,ATP binding; GO:0004674,protein serine/threonine kinase activity; GO:0007166,cell surface receptor signaling pathway	PF07714.17:Protein tyrosine kinase
gene-LOC100281066	NC_050096.1	251849387	251853940	-	1.2	0.78	0.56	5.43	4.23	6.3	2.412	9.83317e-06	0.000792403	up	K00679 phospholipid:diacylglycerol acyltransferase [EC:2.3.1.158] | (RefSeq) hypothetical protein (A)	anther-specific proline-rich protein APG [Zea mays]	RecName: Full=GDSL esterase/lipase At4g16230; EC=3.1.1.-; AltName: Full=Extracellular lipase At4g16230; Flags: Precursor;	SubName: Full=Anther-specific proline-rich protein APG {ECO:0000313|EMBL:ACG27609.1}; SubName: Full=GDSL esterase/lipase {ECO:0000313|EMBL:ONM06718.1};	--	GO:0005576,extracellular region; GO:0016788,hydrolase activity, acting on ester bonds; GO:0016042,lipid catabolic process	PF00657.22:GDSL-like Lipase/Acylhydrolase
gene-LOC100281067	NC_050096.1	79196950	79198698	+	5.23	3.82	2.85	12.97	12.79	24.28	1.871	0.00106318	0.0329732	up	K13691 pathogen-inducible salicylic acid glucosyltransferase [EC:2.4.1.-] | (RefSeq) UDP-glycosyltransferase 74F2-like (A)	uncharacterized protein LOC100281067 isoform X1 [Zea mays]	RecName: Full=UDP-glycosyltransferase 79 {ECO:0000305}; Short=OsUGT79 {ECO:0000303|PubMed:26197338}; EC=2.4.1.- {ECO:0000269|PubMed:26197338}; AltName: Full=Deoxynivalenol-UDP-glucosyltransferase {ECO:0000303|PubMed:27715009};	RecName: Full=Glycosyltransferase {ECO:0000256|RuleBase:RU362057}; EC=2.4.1.- {ECO:0000256|RuleBase:RU362057};	UDP-glucuronosyl and UDP-glucosyl transferase	GO:0043231,intracellular membrane-bounded organelle; GO:0000166,nucleotide binding; GO:0080043,quercetin 3-O-glucosyltransferase activity; GO:0080044,quercetin 7-O-glucosyltransferase activity; GO:0008194,UDP-glycosyltransferase activity; GO:0098754,detoxification; GO:0008152,metabolic process	PF00201.18:UDP-glucoronosyl and UDP-glucosyl transferase
gene-LOC100281069	NC_050096.1	144254766	144258705	-	5.13	5.14	2.84	27.56	23.42	33.41	2.472	2.07602e-07	2.94376e-05	up	K15919 hydroxypyruvate reductase 2 | (RefSeq) glyoxylate reductase (A)	Glyoxylate reductase [Zea mays]	RecName: Full=Hydroxyphenylpyruvate reductase; Short=HPPR; EC=1.1.1.237;	SubName: Full=Glyoxylate reductase {ECO:0000313|EMBL:ONM01082.1};	Glyoxylate/hydroxypyruvate reductase (D-isomer-specific 2-hydroxy acid dehydrogenase superfamily)	GO:0047995,hydroxyphenylpyruvate reductase activity; GO:0051287,NAD binding; GO:0102742,R(+)-3,4-dihydroxyphenyllactate:NADP+ oxidoreductase activity; GO:0055114,oxidation-reduction process	PF02826.19:D-isomer specific 2-hydroxyacid dehydrogenase, NAD binding domain
gene-LOC100281076	NC_050100.1	192900137	192901740	+	2.74	3.65	4.12	13.19	8.24	19.66	1.856	0.000235951	0.0105123	up	K15095 (+)-neomenthol dehydrogenase [EC:1.1.1.208] | (RefSeq) umc2600; uncharacterized protein LOC100281076 (A)	uncharacterized protein LOC100281076 [Zea mays]	RecName: Full=Salutaridine reductase {ECO:0000312|EMBL:ABO93462.1}; EC=1.1.1.248;	SubName: Full=(+)-neomenthol dehydrogenase {ECO:0000313|EMBL:AQK73040.1}; SubName: Full=Carbonyl reductase 1 {ECO:0000313|EMBL:ACG27634.1};	Dehydrogenases with different specificities (related to short-chain alcohol dehydrogenases)	GO:0047037,salutaridine reductase (NADPH) activity; GO:0009820,alkaloid metabolic process	PF00106.25:short chain dehydrogenase
gene-LOC100281081	NC_050104.1	103981248	103985694	+	30.59	16.66	15.59	6.85	6.1	8.56	-1.815	0.000642538	0.0230996	down	K03549 KUP system potassium uptake protein | (RefSeq) HAK10; potassium transporter 10 (A)	potassium transporter 10 [Zea mays]	RecName: Full=Potassium transporter 10; AltName: Full=OsHAK10;	RecName: Full=Potassium transporter {ECO:0000256|RuleBase:RU321113};	--	GO:0016021,integral component of membrane; GO:0005886,plasma membrane; GO:0005774,vacuolar membrane; GO:0015079,potassium ion transmembrane transporter activity	PF02705.16:K+ potassium transporter
gene-LOC100281089	NC_050104.1	142046900	142050444	-	3.99	7.81	10.32	17.91	16.49	16.86	1.069	0.00135093	0.0393718	up	K01913 acetate---CoA ligase [EC:6.2.1.1] | (RefSeq) IDP708; uncharacterized protein LOC100281089 (A)	uncharacterized protein LOC100281089 [Zea mays]	RecName: Full=Acetate/butyrate--CoA ligase AAE7, peroxisomal; EC=6.2.1.1; EC=6.2.1.2; AltName: Full=AMP-binding protein 7; Short=AtAMPBP7; AltName: Full=Acetyl-CoA synthetase; AltName: Full=Acyl-activating enzyme 7; AltName: Full=Butyryl-CoA synthetase; AltName: Full=Protein ACETATE NON-UTILIZING 1;	SubName: Full=AMP-binding protein {ECO:0000313|EMBL:ACG27660.1}; SubName: Full=Acetate/butyrate--CoA ligase AAE7 peroxisomal {ECO:0000313|EMBL:AQL07220.1};	Acyl-CoA synthetase	GO:0005777,peroxisome; GO:0003987,acetate-CoA ligase activity; GO:0047760,butyrate-CoA ligase activity; GO:0006083,acetate metabolic process; GO:0019605,butyrate metabolic process; GO:0006097,glyoxylate cycle	PF00501.28:AMP-binding enzyme
gene-LOC100281106	NC_050101.1	71750622	71752521	+	17.5	25.28	25.24	15.24	12.54	10.8	-1.025	2.82531e-07	3.8758e-05	down	--	protein binding protein [Zea mays]	RecName: Full=BAG family molecular chaperone regulator 3; AltName: Full=Bcl-2-associated athanogene 3;	SubName: Full=BAG family molecular chaperone regulator 1 {ECO:0000313|EMBL:AQK80106.1};	BCL2-associated athanogene-like proteins and related BAG family chaperone regulators	GO:0051087,chaperone binding	PF02179.16:BAG domain
gene-LOC100281111	NC_050101.1	44437698	44438778	+	6.27	6.71	10.19	25.07	19.76	26.29	1.449	4.95622e-05	0.00300779	up	--	protein kinase precursor [Zea mays]	RecName: Full=Cysteine-rich repeat secretory protein 55; Flags: Precursor;	SubName: Full=Protein kinase {ECO:0000313|EMBL:ACG27750.1}; SubName: Full=Putative DUF26 domain family protein {ECO:0000313|EMBL:AQK79391.1};	--	GO:0005576,extracellular region; GO:0080167,response to karrikin	PF01657.17:Salt stress response/antifungal
gene-LOC100281147	NC_050096.1	165959991	165961210	+	0.63	2.7	0.89	7.52	4.08	8.46	2.164	0.000669224	0.0237237	up	--	zinc-finger protein 1 [Zea mays]	RecName: Full=Zinc finger protein 1; AltName: Full=WZF1;	SubName: Full=Zinc finger protein AZF2 {ECO:0000313|EMBL:ONM01610.1};	FOG: Zn-finger	GO:0005634,nucleus; GO:0003677,DNA binding; GO:0046872,metal ion binding; GO:0006355,regulation of transcription, DNA-templated; GO:0006351,transcription, DNA-templated	PF13912.6:C2H2-type zinc finger
gene-LOC100281170	NC_050103.1	136028095	136030051	-	6.96	8.2	2.7	21.44	35.17	25.19	1.927	0.000277577	0.0119691	up	--	loricrin isoform X1 [Zea mays]	--	SubName: Full=Loricrin {ECO:0000313|EnsemblPlants:Zm00001d011003_P001};	--	--	--
gene-LOC100281178	NC_050099.1	65096699	65102239	+	7.62	9.89	14.95	6.72	7.94	4.06	-1.022	0.0004115	0.0162819	down	K01051 pectinesterase [EC:3.1.1.11] | (RefSeq) pectinesterase PPE8B precursor (A)	pectinesterase PPE8B precursor [Zea mays]	RecName: Full=Pectinesterase/pectinesterase inhibitor PPE8B; Includes: RecName: Full=Pectinesterase inhibitor PPE8B; AltName: Full=Pectin methylesterase inhibitor PPE8B; Includes: RecName: Full=Pectinesterase PPE8B; Short=PE PPE8B; EC=3.1.1.11; AltName: Full=Pectin methylesterase PPE8B; Flags: Precursor;	RecName: Full=Pectinesterase {ECO:0000256|RuleBase:RU000589}; EC=3.1.1.11 {ECO:0000256|RuleBase:RU000589};	--	GO:0005618,cell wall; GO:0005576,extracellular region; GO:0045330,aspartyl esterase activity; GO:0004857,enzyme inhibitor activity; GO:0030599,pectinesterase activity; GO:0042545,cell wall modification; GO:0050829,defense response to Gram-negative bacterium; GO:0045490,pectin catabolic process	PF01095.19:Pectinesterase
gene-LOC100281181	NC_050097.1	189330758	189333136	+	3.27	2.05	1.64	15.04	15.26	21.92	2.666	5.83387e-07	6.99448e-05	up	K20623 typhasterol/6-deoxotyphasterol 2alpha-hydroxylase | (RefSeq) flavonoid 3-monooxygenase (A)	flavonoid 3-monooxygenase [Zea mays]	RecName: Full=Cytochrome P450 71A1; EC=1.14.-.-; AltName: Full=ARP-2; AltName: Full=CYPLXXIA1;	SubName: Full=Flavonoid 3-monooxygenase {ECO:0000313|EMBL:ACG27961.1};	Cytochrome P450 CYP2 subfamily	GO:0005789,endoplasmic reticulum membrane; GO:0016021,integral component of membrane; GO:0031090,organelle membrane; GO:0020037,heme binding; GO:0005506,iron ion binding; GO:0004497,monooxygenase activity; GO:0016705,oxidoreductase activity, acting on paired donors, with incorporation or reduction of molecular oxygen; GO:0009835,fruit ripening	PF00067.22:Cytochrome P450
gene-LOC100281227	NC_050097.1	154371514	154372991	-	0.4	0.31	0.57	5.66	3.44	9.44	3.731	7.99732e-09	1.67513e-06	up	K00521 ferric-chelate reductase [EC:1.16.1.7] | (RefSeq) ferric reduction oxidase 7, chloroplastic-like (A)	NAC domain-containing protein 77 [Zea mays]	RecName: Full=NAC domain-containing protein 77 {ECO:0000303|PubMed:15029955}; Short=ONAC077 {ECO:0000303|PubMed:15029955}; AltName: Full=NAC domain-containing protein 300 {ECO:0000303|PubMed:15654622}; Short=ONAC300 {ECO:0000303|PubMed:15654622};	SubName: Full=NAC domain-containing protein 77 {ECO:0000313|EMBL:ACG28126.1};	--	GO:0005634,nucleus; GO:0043565,sequence-specific DNA binding; GO:0006355,regulation of transcription, DNA-templated; GO:0006351,transcription, DNA-templated	PF02365.15:No apical meristem (NAM) protein
gene-LOC100281233	NC_050099.1	23609969	23611839	-	0.61	0.9	0.19	6.84	4.57	8.07	3.345	3.42842e-07	4.51419e-05	up	K13418 somatic embryogenesis receptor kinase 1 [EC:2.7.10.1 2.7.11.1] | (RefSeq) LOW QUALITY PROTEIN: somatic embryogenesis receptor kinase 2-like (A)	BRASSINOSTEROID INSENSITIVE 1-associated receptor kinase 1 [Zea mays]	RecName: Full=Leucine-rich repeat protein 1 {ECO:0000303|PubMed:14984927}; AltName: Full=Capsicum annuum-induced protein 23 {ECO:0000303|PubMed:10656596}; Flags: Precursor;	SubName: Full=Uncharacterized protein {ECO:0000313|EnsemblPlants:Zm00001d000298_P002};	--	GO:0005737,cytoplasm	PF13855.6:Leucine rich repeat
gene-LOC100281239	NC_050097.1	17166349	17167549	-	4.13	4.5	2.09	0.3	0.5	0.95	-2.794	3.69055e-05	0.00239755	down	K09286 EREBP-like factor | (RefSeq) dehydration-responsive element-binding protein 1B-like (A)	dehydration-responsive element-binding protein 1D [Zea mays]	RecName: Full=Dehydration-responsive element-binding protein 1E; Short=Protein DREB1E;	SubName: Full=Dehydration-responsive element-binding protein 1D {ECO:0000313|EMBL:ACG28162.1};	--	GO:0005634,nucleus; GO:0003677,DNA binding; GO:0003700,DNA-binding transcription factor activity; GO:0006351,transcription, DNA-templated	PF00847.20:AP2 domain
gene-LOC100281244	NC_050102.1	120285824	120287056	-	0	0	0.23	6.71	8.71	10.11	6.543	4.83646e-14	3.39635e-11	up	K13424 WRKY transcription factor 33 | (RefSeq) WRKY transcription factor WRKY24 (A)	WRKY62 - superfamily of TFs having WRKY and zinc finger domains [Zea mays]	RecName: Full=WRKY transcription factor WRKY62 {ECO:0000303|PubMed:16528562}; Short=OsWRKY62 {ECO:0000303|PubMed:16528562}; AltName: Full=XA21-binding protein 10 {ECO:0000305};	SubName: Full=WRKY transcription factor {ECO:0000313|EMBL:AIB05690.1}; SubName: Full=WRKY62-superfamily of TFs having WRKY and zinc finger domains {ECO:0000313|EMBL:ACG28207.1};	--	GO:0005634,nucleus; GO:0005524,ATP binding; GO:0003700,DNA-binding transcription factor activity; GO:0043565,sequence-specific DNA binding; GO:0006952,defense response; GO:1900425,negative regulation of defense response to bacterium; GO:0009617,response to bacterium; GO:0010200,response to chitin; GO:0009620,response to fungus; GO:0009751,response to salicylic acid; GO:0006351,transcription, DNA-…	PF03106.15:WRKY DNA -binding domain
gene-LOC100281253	NC_050097.1	239810267	239812256	+	16.73	18.89	19.46	10.62	11.42	6.8	-1.187	2.42169e-08	4.63801e-06	down	K13420 LRR receptor-like serine/threonine-protein kinase FLS2 [EC:2.7.11.1] | (RefSeq) probable LRR receptor-like serine/threonine-protein kinase At3g47570 isoform X1 (A)	receptor protein kinase CLAVATA1 precursor [Zea mays]	RecName: Full=Leucine-rich repeat extensin-like protein 4; Short=AtLRX4; Short=LRR/EXTENSIN4; AltName: Full=Cell wall hydroxyproline-rich glycoprotein; Flags: Precursor;	SubName: Full=Leucine-rich repeat extensin-like protein 6 {ECO:0000313|EMBL:ONM27701.1}; SubName: Full=Receptor protein kinase CLAVATA1 {ECO:0000313|EMBL:ACG28239.1};	--	GO:0005618,cell wall; GO:0005576,extracellular region; GO:0009505,plant-type cell wall; GO:0009506,plasmodesma; GO:0005199,structural constituent of cell wall; GO:0071555,cell wall organization	PF13855.6:Leucine rich repeat
gene-LOC100281284	NC_050098.1	180787466	180789042	-	3.29	2.86	1.71	14.8	10.26	23.05	2.425	2.98846e-05	0.00198071	up	K18823 soyasaponin III rhamnosyltransferase [EC:2.4.1.273] | (RefSeq) soyasaponin III rhamnosyltransferase (A)	anthocyanidin 3-O-glucosyltransferase [Zea mays]	RecName: Full=Putative UDP-rhamnose:rhamnosyltransferase 1; Short=FaRT1 {ECO:0000303|PubMed:16443693}; EC=2.4.1.- {ECO:0000250|UniProtKB:Q940V3}; AltName: Full=Glycosyltransferase 4; Short=FaGT4 {ECO:0000312|EMBL:AAU09445.1};	SubName: Full=Anthocyanidin 3-O-glucosyltransferase {ECO:0000313|EMBL:ONM36203.1};	UDP-glucuronosyl and UDP-glucosyl transferase	GO:0016021,integral component of membrane; GO:0016758,transferase activity, transferring hexosyl groups; GO:0008152,metabolic process	PF00201.18:UDP-glucoronosyl and UDP-glucosyl transferase
gene-LOC100281297	NC_050101.1	150690998	150693320	+	0.64	0.33	0.63	7.69	5.01	14.41	3.935	2.62094e-09	6.49596e-07	up	K03327 multidrug resistance protein, MATE family | (RefSeq) transparent testa 12 protein (A)	transparent testa 12 protein [Zea mays]	RecName: Full=Protein DETOXIFICATION 16 {ECO:0000303|PubMed:11739388}; Short=AtDTX16 {ECO:0000303|PubMed:11739388}; AltName: Full=Multidrug and toxic compound extrusion protein 16 {ECO:0000305}; Short=MATE protein 16 {ECO:0000305};	RecName: Full=Protein DETOXIFICATION {ECO:0000256|RuleBase:RU004914}; AltName: Full=Multidrug and toxic compound extrusion protein {ECO:0000256|RuleBase:RU004914};	Uncharacterized membrane protein, predicted efflux pump	GO:0016021,integral component of membrane; GO:0005774,vacuolar membrane; GO:0015297,antiporter activity; GO:0015238,drug transmembrane transporter activity; GO:0006855,drug transmembrane transport; GO:0009624,response to nematode	PF01554.18:MatE
gene-LOC100281314	NC_050105.1	4269579	4270726	-	3.39	7.48	5.54	23.83	14.47	29.61	1.945	4.22576e-05	0.00265746	up	--	uncharacterized protein LOC100281314 precursor [Zea mays]	RecName: Full=Phytosulfokines 5; AltName: Full=Secretory protein SH27A; Contains: RecName: Full=Phytosulfokine-alpha; Short=PSK-alpha; Short=Phytosulfokine-a; Contains: RecName: Full=Phytosulfokine-beta; Short=PSK-beta; Short=Phytosulfokine-b; Flags: Precursor;	SubName: Full=Phytosulfokines 2 {ECO:0000313|EMBL:ACG28419.1};	--	GO:0005576,extracellular region; GO:0008083,growth factor activity; GO:0030154,cell differentiation; GO:0008283,cell proliferation; GO:0007275,multicellular organism development	PF06404.12:Phytosulfokine precursor protein (PSK)
gene-LOC100281350	NC_050096.1	67812462	67814282	-	83.74	79.33	50.17	27.53	39.4	24.17	-1.518	0.000107575	0.0056456	down	K22684 metacaspase-1 [EC:3.4.22.-] | (RefSeq) LOL3; putative metacaspase family protein (A)	putative metacaspase family protein [Zea mays]	RecName: Full=Metacaspase-1; Short=AtMC1; EC=3.4.22.-; AltName: Full=Metacaspase 1b; Short=AtMCP1b; AltName: Full=Protein LSD ONE LIKE 3;	SubName: Full=LOL3 {ECO:0000313|EMBL:ACG28533.1};	Metacaspase involved in regulation of apoptosis	GO:0004197,cysteine-type endopeptidase activity; GO:0006952,defense response; GO:0043068,positive regulation of programmed cell death	PF00656.22:Caspase domain
gene-LOC100281406	NC_050101.1	159457650	159468677	-	4.14	2.64	1.94	11.37	15.53	25.34	2.363	9.61302e-05	0.00517384	up	K21867 potassium channel | (RefSeq) potassium channel AKT2/3 (A)	potassium channel AKT2/3 isoform X1 [Zea mays]	RecName: Full=Potassium channel AKT2;	SubName: Full=Potassium channel AKT2/3 {ECO:0000313|EMBL:ACG28726.1}; SubName: Full=Potassium channel2 {ECO:0000313|EMBL:AQK86135.1};	K+-channel ERG and related proteins, contain PAS/PAC sensor domain	GO:0005887,integral component of plasma membrane; GO:0005249,voltage-gated potassium channel activity; GO:0034765,regulation of ion transmembrane transport; GO:0042391,regulation of membrane potential	PF00520.31:Ion transport protein
gene-LOC100281434	NC_050101.1	179410281	179412261	+	3.75	3.44	3.37	24.79	21.78	41.95	2.906	3.03335e-09	7.21497e-07	up	K08900 mitochondrial chaperone BCS1 | (RefSeq) mitochondrial chaperone BCS1 (A)	mitochondrial chaperone BCS1 [Zea mays]	RecName: Full=Protein HYPER-SENSITIVITY-RELATED 4 {ECO:0000303|PubMed:15181213}; Short=AtHSR4 {ECO:0000303|PubMed:15181213}; EC=3.6.1.3 {ECO:0000250|UniProtKB:Q9FLD5}; AltName: Full=BCS1-like protein;	SubName: Full=Mitochondrial chaperone BCS1 {ECO:0000313|EMBL:ACG28815.1}; SubName: Full=Protein HYPER-SENSITIVITY-RELATED 4 {ECO:0000313|EMBL:AQK88991.1};	AAA+-type ATPase	GO:0016021,integral component of membrane; GO:0005740,mitochondrial envelope; GO:0005741,mitochondrial outer membrane; GO:0005739,mitochondrion; GO:0005524,ATP binding; GO:0016887,ATPase activity; GO:0042802,identical protein binding; GO:0008219,cell death; GO:0009626,plant-type hypersensitive response; GO:0009617,response to bacterium; GO:0002237,response to molecule of bacterial origin; GO:0009…	PF14363.6:Domain associated at C-terminal with AAA
gene-LOC100281436	NC_050100.1	63847741	63850362	+	2.75	3.36	1.58	8.9	6.94	12.42	1.696	0.00121821	0.036738	up	K00924 kinase [EC:2.7.1.-] | (RefSeq) aspartic proteinase-like protein 2 (A)	unknown [Zea mays]	RecName: Full=Aspartyl protease family protein 1 {ECO:0000305}; EC=3.4.23.- {ECO:0000305}; Flags: Precursor;	SubName: Full=Eukaryotic aspartyl protease family protein {ECO:0000313|EMBL:AQK67217.1};	Aspartyl protease	GO:0031225,anchored component of membrane; GO:0005886,plasma membrane; GO:0004190,aspartic-type endopeptidase activity; GO:0030163,protein catabolic process; GO:0006508,proteolysis	PF14543.6:Xylanase inhibitor N-terminal
gene-LOC100281437	NC_050101.1	12603085	12605884	+	0.7	1.92	1.31	12.99	7.08	18.51	3.228	1.03232e-08	2.11438e-06	up	K19476 vacuolar protein sorting-associated protein IST1 | (RefSeq) hypothetical protein (A)	LHT1 [Zea mays]	RecName: Full=Lysine histidine transporter 1;	SubName: Full=LHT1 {ECO:0000313|EMBL:ACG28821.1};	Amino acid transporters	GO:0016021,integral component of membrane; GO:0005886,plasma membrane; GO:0015171,amino acid transmembrane transporter activity; GO:0015293,symporter activity; GO:0043090,amino acid import; GO:0080167,response to karrikin	PF01490.18:Transmembrane amino acid transporter protein
gene-LOC100281450	NC_050096.1	146796690	146798221	+	3.99	4.57	3.7	13.16	11.87	17.33	1.611	6.15073e-05	0.00362095	up	--	light-inducible protein CPRF-2 [Zea mays]	RecName: Full=bZIP transcription factor 44 {ECO:0000305}; Short=AtbZIP44 {ECO:0000303|PubMed:11906833};	SubName: Full=Light-inducible protein CPRF-2 {ECO:0000313|EMBL:ACG28867.1};	--	GO:0005634,nucleus; GO:0003700,DNA-binding transcription factor activity; GO:0046982,protein heterodimerization activity; GO:0043565,sequence-specific DNA binding; GO:0044212,transcription regulatory region DNA binding; GO:0009845,seed germination; GO:0006351,transcription, DNA-templated	PF00170.21:bZIP transcription factor
gene-LOC100281532	NC_050099.1	148685943	148688452	+	0.53	0.4	0.47	2.76	2.24	3.28	2.371	3.00123e-07	4.06047e-05	up	K10775 phenylalanine ammonia-lyase [EC:4.3.1.24] | (RefSeq) phenylalanine ammonia-lyase (A)	phenylalanine ammonia-lyase [Zea mays]	RecName: Full=Phenylalanine ammonia-lyase; EC=4.3.1.24;	RecName: Full=Phenylalanine ammonia-lyase {ECO:0000256|RuleBase:RU003955}; EC=4.3.1.24 {ECO:0000256|RuleBase:RU003955};	Phenylalanine and histidine ammonia-lyase	GO:0005737,cytoplasm; GO:0045548,phenylalanine ammonia-lyase activity; GO:0009800,cinnamic acid biosynthetic process; GO:0006559,L-phenylalanine catabolic process	PF00221.19:Aromatic amino acid lyase
gene-LOC100281574	NC_050103.1	80736005	80737907	+	10.49	5.63	4.87	1.95	1.4	2.04	-2.242	6.41703e-05	0.0037478	down	K22683 aspartyl protease family protein [EC:3.4.23.-] | (RefSeq) aspartyl protease family protein 2-like (A)	pepsin A precursor [Zea mays]	RecName: Full=Aspartic proteinase NANA, chloroplast {ECO:0000303|PubMed:22987884}; EC=3.4.23.- {ECO:0000269|PubMed:22987884}; Flags: Precursor;	SubName: Full=Uncharacterized protein {ECO:0000313|EMBL:ACR34854.1};	Aspartyl protease	GO:0009507,chloroplast; GO:0004190,aspartic-type endopeptidase activity; GO:0005975,carbohydrate metabolic process; GO:0010019,chloroplast-nucleus signaling pathway; GO:0007623,circadian rhythm; GO:0010492,maintenance of shoot apical meristem identity; GO:0030163,protein catabolic process; GO:0009744,response to sucrose	PF14543.6:Xylanase inhibitor N-terminal
gene-LOC100281579	NC_050097.1	27906991	27909428	+	19.87	44.35	53.19	26.19	20.58	12.95	-1.164	0.000836475	0.028129	down	K01179 endoglucanase [EC:3.2.1.4] | (RefSeq) glycoside transferase, six-hairpin, subgroup (A)	glycoside transferase, six-hairpin, subgroup [Zea mays]	RecName: Full=Endoglucanase 12; EC=3.2.1.4; AltName: Full=Endo-1,4-beta glucanase 12; AltName: Full=OsGLU3;	RecName: Full=Endoglucanase {ECO:0000256|RuleBase:RU361166}; EC=3.2.1.4 {ECO:0000256|RuleBase:RU361166};	--	GO:0016021,integral component of membrane; GO:0008810,cellulase activity; GO:0071555,cell wall organization; GO:0030245,cellulose catabolic process	PF00759.19:Glycosyl hydrolase family 9
gene-LOC100281647	NC_050102.1	31825145	31825771	+	20.66	4.27	26.48	1.71	3.45	2.73	-2.962	4.67315e-05	0.00287955	down	--	PVR3-like protein precursor [Zea mays]	RecName: Full=Putative lipid-transfer protein DIR1; AltName: Full=Protein DEFECTIVE IN INDUCED RESISTANCE 1; Flags: Precursor;	SubName: Full=Putative lipid-transfer protein DIR1 {ECO:0000313|EMBL:ONM52850.1};	--	GO:0048046,apoplast; GO:0005783,endoplasmic reticulum; GO:0009506,plasmodesma; GO:0005504,fatty acid binding; GO:0043621,protein self-association; GO:0008270,zinc ion binding; GO:0006869,lipid transport; GO:0009627,systemic acquired resistance; GO:0009862,systemic acquired resistance, salicylic acid mediated signaling pathway	PF14368.6:Probable lipid transfer
gene-LOC100281661	NC_050097.1	223641201	223643722	-	4.46	2.65	2.14	11.53	12.96	22.51	2.122	0.000392121	0.015671	up	K07198 5'-AMP-activated protein kinase, catalytic alpha subunit [EC:2.7.11.11] | (RefSeq) CBL-interacting serine/threonine-protein kinase 15 (A)	CBL-interacting serine/threonine-protein kinase 15 [Zea mays]	RecName: Full=CBL-interacting protein kinase 2; EC=2.7.11.1; AltName: Full=OsCIPK02;	RecName: Full=Non-specific serine/threonine protein kinase {ECO:0000256|SAAS:SAAS00351747}; EC=2.7.11.1 {ECO:0000256|SAAS:SAAS00351747};	Serine/threonine protein kinase	GO:0005622,intracellular; GO:0005524,ATP binding; GO:0004674,protein serine/threonine kinase activity; GO:0035556,intracellular signal transduction; GO:0018105,peptidyl-serine phosphorylation; GO:0018107,peptidyl-threonine phosphorylation	PF00069.25:Protein kinase domain
gene-LOC100281699	NC_050097.1	45506247	45508428	-	0.13	0.22	0.02	1.8	1.7	4.88	4.41	5.8007e-07	6.9831e-05	up	K21374 7-deoxyloganetin glucosyltransferase [EC:2.4.1.324] | (RefSeq) 7-deoxyloganetin glucosyltransferase-like (A)	Cytokinin-O-glucosyltransferase 2 [Zea mays]	RecName: Full=7-deoxyloganetin glucosyltransferase; EC=2.4.1.324; AltName: Full=Genipin glucosyltransferase; AltName: Full=UDP-glucose glucosyltransferase 2; Short=GjUGT2; AltName: Full=UDP-glycosyltransferase 85A24;	RecName: Full=Glycosyltransferase {ECO:0000256|RuleBase:RU362057}; EC=2.4.1.- {ECO:0000256|RuleBase:RU362057};	UDP-glucuronosyl and UDP-glucosyl transferase	GO:0035251,UDP-glucosyltransferase activity; GO:0008152,metabolic process	PF00201.18:UDP-glucoronosyl and UDP-glucosyl transferase
gene-LOC100281734	NC_050097.1	36057807	36059633	-	1.12	0.85	0.67	12.86	10.73	25.54	4.051	2.64734e-11	1.05514e-08	up	K08900 mitochondrial chaperone BCS1 | (RefSeq) AAA-ATPase ASD, mitochondrial-like (A)	ATPase 3 [Zea mays]	RecName: Full=AAA-ATPase ASD, mitochondrial; EC=3.6.1.3 {ECO:0000269|PubMed:21359673}; AltName: Full=AAA-ATPase 1; AltName: Full=Protein ATPASE-IN-SEED-DEVELOPMENT {ECO:0000303|PubMed:21359673};	SubName: Full=AAA-ATPase ASD mitochondrial {ECO:0000313|EMBL:ONM16413.1};	AAA+-type ATPase	GO:0005783,endoplasmic reticulum; GO:0016021,integral component of membrane; GO:0031966,mitochondrial membrane; GO:0005739,mitochondrion; GO:0005524,ATP binding; GO:0016887,ATPase activity; GO:0010154,fruit development; GO:0009737,response to abscisic acid; GO:0009409,response to cold; GO:0009651,response to salt stress; GO:0009414,response to water deprivation; GO:0010431,seed maturation	PF14363.6:Domain associated at C-terminal with AAA
gene-LOC100281753	NC_050101.1	101274594	101284065	-	0.97	1.06	1.06	3.74	3.88	4.25	1.745	4.35046e-07	5.53071e-05	up	K13416 brassinosteroid insensitive 1-associated receptor kinase 1 [EC:2.7.10.1 2.7.11.1] | (RefSeq) BRASSINOSTEROID INSENSITIVE 1-associated receptor kinase 1-like (A)	unknown [Zea mays]	RecName: Full=Cold-responsive protein kinase 1 {ECO:0000303|PubMed:28344081}; EC=2.7.11.1 {ECO:0000255|PROSITE-ProRule:PRU00159, ECO:0000269|PubMed:28344081};	SubName: Full=Protein kinase superfamily protein {ECO:0000313|EMBL:AQK81475.1};	Serine/threonine protein kinase	GO:0005886,plasma membrane; GO:0005524,ATP binding; GO:0004674,protein serine/threonine kinase activity; GO:0033160,positive regulation of protein import into nucleus, translocation; GO:0046777,protein autophosphorylation; GO:0009409,response to cold; GO:0050826,response to freezing; GO:0009625,response to insect; GO:0002237,response to molecule of bacterial origin	PF00069.25:Protein kinase domain
gene-LOC100281764	NC_050105.1	120238798	120242165	+	0.97	1.53	1.09	9.8	6.63	14.59	2.991	4.22654e-09	9.57973e-07	up	K19564 choline transport protein | (RefSeq) choline transport protein-like (A)	Amino acid permease [Zea mays]	RecName: Full=Amino-acid permease BAT1 homolog;	SubName: Full=Amino acid permease {ECO:0000313|EMBL:AQK43730.1};	Amino acid transporters	GO:0005887,integral component of plasma membrane; GO:0015297,antiporter activity; GO:0015181,arginine transmembrane transporter activity; GO:0015185,gamma-aminobutyric acid transmembrane transporter activity; GO:0015180,L-alanine transmembrane transporter activity; GO:0005313,L-glutamate transmembrane transporter activity; GO:0015189,L-lysine transmembrane transporter activity; GO:0015812,gamma-a…	PF13520.6:Amino acid permease
gene-LOC100281767	NC_050096.1	9055373	9058354	+	17.7	13.94	10.79	106.8	90.33	197.11	3.033	7.56527e-08	1.24654e-05	up	K01177 beta-amylase [EC:3.2.1.2] | (RefSeq) pco104637; beta-amylase (A)	beta-amylase [Zea mays]	RecName: Full=Beta-amylase 2, chloroplastic {ECO:0000305}; Short=OsBamy2 {ECO:0000303|PubMed:21512221}; EC=3.2.1.2 {ECO:0000269|PubMed:21512221}; AltName: Full=4-alpha-D-glucan maltohydrolase {ECO:0000305}; Flags: Precursor;	RecName: Full=Beta-amylase {ECO:0000256|RuleBase:RU000509}; EC=3.2.1.2 {ECO:0000256|RuleBase:RU000509};	--	GO:0009507,chloroplast; GO:0102229,amylopectin maltohydrolase activity; GO:0016161,beta-amylase activity; GO:0000272,polysaccharide catabolic process	PF01373.17:Glycosyl hydrolase family 14
gene-LOC100281825	NC_050096.1	7347546	7348802	+	15.19	11.87	19.35	64.55	91.18	76.73	2.103	2.03047e-09	5.16264e-07	up	K20547 basic endochitinase B [EC:3.2.1.14] | (RefSeq) basic endochitinase C precursor (A)	unknown [Zea mays]	RecName: Full=Chitinase 11; EC=3.2.1.14; AltName: Full=Pathogenesis related (PR)-3 chitinase 11; Flags: Precursor;	SubName: Full=Basic endochitinase B {ECO:0000313|EMBL:ONL93373.1};	Predicted chitinase	GO:0004568,chitinase activity; GO:0016998,cell wall macromolecule catabolic process; GO:0006032,chitin catabolic process; GO:0000272,polysaccharide catabolic process	PF00182.19:Chitinase class I
gene-LOC100281843	NC_050105.1	121628213	121629314	-	1.25	4.81	4.89	0.88	1	1.04	-2.021	0.000151991	0.00737306	down	K09286 EREBP-like factor | (RefSeq) ethylene-responsive transcription factor ERF023 isoform X1 (A)	Ethylene-responsive transcription factor ERF021 [Zea mays]	RecName: Full=Ethylene-responsive transcription factor ERF021;	SubName: Full=Ethylene-responsive transcription factor ERF021 {ECO:0000313|EMBL:AQK43831.1};	--	GO:0005634,nucleus; GO:0003677,DNA binding; GO:0003700,DNA-binding transcription factor activity; GO:0009873,ethylene-activated signaling pathway; GO:0006351,transcription, DNA-templated	PF00847.20:AP2 domain
gene-LOC100281855	NC_050099.1	4569241	4572650	+	1.7	1.95	2.03	6.91	5.01	7.7	1.617	9.50561e-05	0.00512538	up	K08081 tropinone reductase I [EC:1.1.1.206] | (RefSeq) tropinone reductase 2 (A)	tropinone reductase 2 isoform X1 [Zea mays]	RecName: Full=Tropinone reductase homolog At2g29360 {ECO:0000305}; EC=1.1.1.- {ECO:0000305};	SubName: Full=Tropinone reductase 2 {ECO:0000313|EMBL:AQK48691.1};	Reductases with broad range of substrate specificities	GO:0016491,oxidoreductase activity	PF00106.25:short chain dehydrogenase
gene-LOC100281868	NC_050104.1	143120565	143121710	+	21.12	23.41	11.47	1.78	3.42	5.29	-2.589	2.45622e-05	0.00170056	down	K14496 abscisic acid receptor PYR/PYL family | (RefSeq) PYL5; cyclase/dehydrase family protein (A)	cyclase/dehydrase family protein [Zea mays]	RecName: Full=Abscisic acid receptor PYL5; AltName: Full=ABI1-binding protein 3; AltName: Full=PYR1-like protein 5; AltName: Full=Regulatory components of ABA receptor 8;	SubName: Full=Cyclase/dehydrase family protein {ECO:0000313|EMBL:ACG30334.1}; SubName: Full=Pyrabactin resistance-like protein {ECO:0000313|EMBL:AIG52077.1};	--	GO:0005737,cytoplasm; GO:0005634,nucleus; GO:0005886,plasma membrane; GO:0010427,abscisic acid binding; GO:0004864,protein phosphatase inhibitor activity; GO:0004872,NA; GO:0009738,abscisic acid-activated signaling pathway	PF10604.9:Polyketide cyclase / dehydrase and lipid transport
gene-LOC100281922	NC_050099.1	247007999	247008866	-	19.62	29.11	21.74	44.84	57.9	60.51	1.034	0.00182564	0.048597	up	K16465 centrin-1 | (RefSeq) calcium-binding protein KIC-like (A)	uncharacterized protein LOC100281922 [Zea mays]	RecName: Full=Calcium-binding protein KIC; AltName: Full=KCBP-interacting calcium-binding protein;	SubName: Full=EF-hand Ca2+-binding protein CCD1 {ECO:0000313|EMBL:ACG30551.1};	Ca2+-binding protein (centrin/caltractin), EF-Hand superfamily protein	GO:0005509,calcium ion binding; GO:0010091,trichome branching	PF13833.6:EF-hand domain pair
gene-LOC100281943	NC_050097.1	220182867	220184331	-	0.15	0.72	0.23	1.01	1.89	4.25	2.688	0.00142399	0.0410951	up	K02183 calmodulin | (RefSeq) probable calcium-binding protein CML45 (A)	probable calcium-binding protein CML45 [Zea mays]	RecName: Full=Probable calcium-binding protein CML45; AltName: Full=Calmodulin-like protein 45;	SubName: Full=EF hand family protein {ECO:0000313|EMBL:ONM25563.1};	Calmodulin and related proteins (EF-Hand superfamily)	GO:0005509,calcium ion binding	PF00036.32:EF hand
gene-LOC100281995	NC_050105.1	150645680	150646855	-	29.11	31.06	30.12	98.52	80.26	107.54	1.472	1.70737e-05	0.00126117	up	--	uncharacterized protein LOC100281995 [Zea mays]	RecName: Full=Stem-specific protein TSJT1;	SubName: Full=Stem-specific protein TSJT1 {ECO:0000313|EMBL:AQK47295.1};	--	--	PF12481.8:Aluminium induced protein
gene-LOC100282065	NC_050096.1	289992230	289993745	+	2.1	1.58	1.16	9.79	6.5	19.22	2.712	4.63831e-05	0.00286797	up	K09539 DnaJ homolog subfamily C member 19 | (RefSeq) mitochondrial import inner membrane translocase subunit TIM14 (A)	mitochondrial import inner membrane translocase subunit TIM14 [Zea mays]	RecName: Full=Mitochondrial import inner membrane translocase subunit TIM14-1; AltName: Full=Chaperone DnaJ-domain containing protein 1;	SubName: Full=Mitochondrial import inner membrane translocase subunit TIM14 {ECO:0000313|EMBL:ACG31506.1};	Molecular chaperone (DnaJ superfamily)	GO:0016021,integral component of membrane; GO:0005743,mitochondrial inner membrane	PF00226.31:DnaJ domain
gene-LOC100282076	NC_050101.1	153452199	153456415	-	16.86	13.84	9.38	62.07	29.58	71.67	1.817	0.00136911	0.0397055	up	K19891 glucan endo-1,3-beta-glucosidase 1/2/3 [EC:3.2.1.39] | (RefSeq) glucan endo-1,3-beta-glucosidase 3-like (A)	lichenase-2 precursor [Zea mays]	RecName: Full=Lichenase-2; EC=3.2.1.73; AltName: Full=(1->3,1->4)-beta-glucanase isoenzyme EII; AltName: Full=Endo-beta-1,3-1,4 glucanase II; AltName: Full=Lichenase II; Flags: Precursor; Fragment;	SubName: Full=Lichenase-2 {ECO:0000313|EMBL:ACG31574.1};	--	GO:0042972,licheninase activity; GO:0005975,carbohydrate metabolic process	PF00332.18:Glycosyl hydrolases family 17
gene-LOC100282113	NC_050098.1	215653253	215654564	+	5.88	11.72	6.93	29.87	23.5	34.2	1.692	2.82601e-05	0.0019117	up	--	ethylene-responsive protein [Zea mays]	RecName: Full=Universal stress protein A-like protein;	SubName: Full=Adenine nucleotide alpha hydrolase-like superfamily protein {ECO:0000313|EMBL:ONM39442.1}; SubName: Full=Ethylene-responsive protein {ECO:0000313|EMBL:ACG31736.1};	--	GO:0005886,plasma membrane; GO:0016208,AMP binding; GO:0006950,response to stress	PF00582.26:Universal stress protein family
gene-LOC100282155	NC_050102.1	171806982	171809796	+	0.11	0.11	0.05	0.52	0.72	1.27	3.067	0.00185101	0.0490951	up	K00799 glutathione S-transferase [EC:2.5.1.18] | (RefSeq) glutathione S-transferase F11-like isoform X1 (A)	golgi transport 1 protein B [Zea mays]	RecName: Full=Vesicle transport protein GOT1 {ECO:0000303|PubMed:25900983}; AltName: Full=Golgi transport 1 {ECO:0000303|PubMed:25900983};	SubName: Full=Golgi transport 1 protein B {ECO:0000313|EMBL:ACG31897.1};	Ferric reductase-like proteins	GO:0000139,Golgi membrane; GO:0016021,integral component of membrane; GO:0016192,vesicle-mediated transport	PF04178.12:Got1/Sft2-like family
gene-LOC100282187	NC_050096.1	4489936	4491300	-	6.06	6.37	7	33.39	52.28	45.93	2.556	4.29897e-14	3.22829e-11	up	K07213 copper chaperone | (RefSeq) copper transport protein ATX1 isoform X1 (A)	heavy metal associated1 [Zea mays]	RecName: Full=Heavy metal-associated isoprenylated plant protein 30 {ECO:0000303|PubMed:21072340, ECO:0000303|PubMed:23368984}; Short=AtHIP30 {ECO:0000303|PubMed:21072340, ECO:0000303|PubMed:23368984}; AltName: Full=Protein NPCC11 {ECO:0000312|EMBL:AEC06738.1}; Flags: Precursor;	SubName: Full=Heavy metal associated1 {ECO:0000313|EMBL:ONL93061.1};	Copper chaperone	GO:0005737,cytoplasm; GO:0046914,transition metal ion binding; GO:0046916,cellular transition metal ion homeostasis; GO:0030001,metal ion transport	PF00403.26:Heavy-metal-associated domain
gene-LOC100282243	NC_050100.1	172539560	172540536	+	4.26	3.78	0.83	87.47	88.46	137.08	4.904	2.17695e-12	1.05257e-09	up	K22255 ATPase inhibitor, mitochondrial | (RefSeq) ATPase inhibitor isoform 1 (A)	ATPase inhibitor [Zea mays]	RecName: Full=Uncharacterized protein At2g27730, mitochondrial; Flags: Precursor;	SubName: Full=ATPase inhibitor {ECO:0000313|EMBL:AQK71521.1};	--	GO:0031966,mitochondrial membrane; GO:0005747,mitochondrial respiratory chain complex I; GO:0005739,mitochondrion; GO:0005730,nucleolus; GO:0045271,respiratory chain complex I; GO:0005773,vacuole; GO:0005507,copper ion binding; GO:0009853,photorespiration	PF04568.12:Mitochondrial ATPase inhibitor, IATP
gene-LOC100282468	NC_050098.1	159226927	159232393	-	19.86	26.26	23.81	55.06	56.63	75.07	1.255	0.000320316	0.013293	up	K02433 aspartyl-tRNA(Asn)/glutamyl-tRNA(Gln) amidotransferase subunit A [EC:6.3.5.6 6.3.5.7] | (RefSeq) Glutamyl-tRNA(Gln) amidotransferase subunit A (A)	phosphatidylinositol transfer protein CSR1 isoform X1 [Zea mays]	RecName: Full=Patellin-4;	SubName: Full=Phosphatidylinositol transfer protein CSR1 {ECO:0000313|EMBL:ACG33135.1};	Phosphatidylinositol transfer protein PDR16 and related proteins	GO:0005829,cytosol; GO:0005634,nucleus; GO:0005886,plasma membrane; GO:0008289,lipid binding; GO:0007049,cell cycle; GO:0051301,cell division	PF00650.20:CRAL/TRIO domain
gene-LOC100282473	NC_050102.1	141448369	141449778	-	8.32	10.79	12.8	29.83	23.97	29.91	1.221	6.61628e-05	0.00384135	up	--	MTD1 [Zea mays]	--	SubName: Full=MTD1 {ECO:0000313|EMBL:ONM56123.1};	Nuclear localization sequence binding protein	--	--
gene-LOC100282636	NC_050101.1	175833518	175835619	-	37.64	50.49	42.85	29.25	27.36	19.92	-1.008	2.26597e-07	3.18251e-05	down	K09510 DnaJ homolog subfamily B member 4 | (RefSeq) dnaJ subfamily B member 5 (A)	unknown [Zea mays]	RecName: Full=DnaJ protein ERDJ3B {ECO:0000305}; AltName: Full=Chaperone protein dnaJ B6 {ECO:0000305}; Short=OsDjB6 {ECO:0000303|PubMed:23160806}; AltName: Full=Endoplasmic reticulum dnaJ domain-containing protein 3B {ECO:0000305}; Short=OsERdj3B {ECO:0000303|PubMed:24153418}; Flags: Precursor;	SubName: Full=HSP40/DnaJ peptide-binding protein {ECO:0000313|EMBL:AQK88434.1};	Molecular chaperone (DnaJ superfamily)	GO:0005788,endoplasmic reticulum lumen; GO:0051082,unfolded protein binding; GO:0006457,protein folding	PF01556.18:DnaJ C terminal domain
gene-LOC100282657	NC_050098.1	185094020	185095896	-	7.41	9.13	7.48	20.99	29.37	23.46	1.402	9.96305e-07	0.000110887	up	K14497 protein phosphatase 2C [EC:3.1.3.16] | (RefSeq) protein phosphatase 2C (A)	protein phosphatase 2C [Zea mays]	RecName: Full=Probable protein phosphatase 2C 9; Short=OsPP2C09; EC=3.1.3.16;	SubName: Full=Protein phosphatase homolog3 {ECO:0000313|EMBL:ONM36489.1};	Serine/threonine protein phosphatase	GO:0016021,integral component of membrane; GO:0046872,metal ion binding; GO:0004722,protein serine/threonine phosphatase activity	PF00481.21:Protein phosphatase 2C
gene-LOC100282659	NC_050102.1	170864245	170865524	-	1.66	2.42	1.89	4.93	7.63	7.74	1.593	6.75348e-05	0.00390188	up	--	Triacylglycerol lipase [Zea mays]	RecName: Full=GDSL esterase/lipase At4g10955; EC=3.1.1.-;	SubName: Full=Triacylglycerol lipase {ECO:0000313|EMBL:ONM59184.1};	--	GO:0016787,hydrolase activity; GO:0016042,lipid catabolic process	PF01764.25:Lipase (class 3)
gene-LOC100282701	NC_050098.1	202684983	202687194	+	9.02	30.64	49.21	14.52	10.15	5.33	-1.734	0.00182182	0.0485409	down	K00679 phospholipid:diacylglycerol acyltransferase [EC:2.3.1.158] | (RefSeq) hypothetical protein (A)	anther-specific proline-rich protein APG precursor [Zea mays]	RecName: Full=GDSL esterase/lipase At5g45670; EC=3.1.1.-; AltName: Full=Extracellular lipase At5g45670; Flags: Precursor;	SubName: Full=Anther-specific proline-rich protein APG {ECO:0000313|EMBL:ACG32365.1}; SubName: Full=GDSL esterase/lipase {ECO:0000313|EMBL:ONM38095.1};	--	GO:0005576,extracellular region; GO:0016788,hydrolase activity, acting on ester bonds; GO:0016042,lipid catabolic process	PF00657.22:GDSL-like Lipase/Acylhydrolase
gene-LOC100282724	NC_050096.1	287022805	287024720	+	11.88	12.9	19.84	38.14	37.37	38.59	1.171	8.55173e-05	0.00471448	up	K14491 two-component response regulator ARR-B family | (RefSeq) two-component response regulator ARR2 isoform X1 (A)	DNA binding protein [Zea mays]	RecName: Full=Transcription factor HHO5 {ECO:0000305}; AltName: Full=MYB-domain transcription factor HHO5 {ECO:0000305}; AltName: Full=Protein HRS1 HOMOLOG 5 {ECO:0000305}; AltName: Full=Protein ULT1 INTERACTING FACTOR 1 {ECO:0000303|PubMed:26903506};	SubName: Full=DNA binding protein {ECO:0000313|EMBL:ACG34204.1}; SubName: Full=G2-like transcription factor {ECO:0000313|EMBL:AIB05546.1};	--	GO:0005829,cytosol; GO:0005634,nucleus; GO:0003700,DNA-binding transcription factor activity; GO:0044212,transcription regulatory region DNA binding; GO:0048449,floral organ formation; GO:0010629,negative regulation of gene expression; GO:0006355,regulation of transcription, DNA-templated; GO:0090701,specification of plant organ identity; GO:0006351,transcription, DNA-templated	PF00249.31:Myb-like DNA-binding domain
gene-LOC100282750	NC_050096.1	123366529	123367423	-	0.31	2.18	1.16	5.41	5.67	8.46	2.36	0.000220861	0.00999093	up	K01802 peptidylprolyl isomerase [EC:5.2.1.8] | (RefSeq) peptidyl-prolyl cis-trans isomerase (A)	peptidyl-prolyl cis-trans isomerase [Zea mays]	RecName: Full=Peptidyl-prolyl cis-trans isomerase; Short=PPIase; EC=5.2.1.8; AltName: Full=Cyclophilin; AltName: Full=Cyclosporin A-binding protein; AltName: Full=Rotamase;	RecName: Full=Peptidyl-prolyl cis-trans isomerase {ECO:0000256|RuleBase:RU363019}; Short=PPIase {ECO:0000256|RuleBase:RU363019}; EC=5.2.1.8 {ECO:0000256|RuleBase:RU363019};	Cyclophilin type peptidyl-prolyl cis-trans isomerase	GO:0005737,cytoplasm; GO:0003755,peptidyl-prolyl cis-trans isomerase activity; GO:0006457,protein folding	PF00160.21:Cyclophilin type peptidyl-prolyl cis-trans isomerase/CLD
gene-LOC100282849	NC_050100.1	38659034	38664005	-	1.88	4.08	4.64	10.22	12.26	10.29	1.47	3.64992e-06	0.000345035	up	K00814 alanine transaminase [EC:2.6.1.2] | (RefSeq) uaz158(alt); uncharacterized protein LOC100282849 (A)	alanine aminotransferase5 [Zea mays]	RecName: Full=Alanine aminotransferase 2; Short=ALAAT-2; EC=2.6.1.2; AltName: Full=Glutamate pyruvate transaminase 2; Short=GPT; AltName: Full=Glutamic--alanine transaminase 2; AltName: Full=Glutamic--pyruvic transaminase 2;	SubName: Full=Alanine aminotransferase5 {ECO:0000313|EMBL:AQK65639.1};	Alanine aminotransferase	GO:0004021,L-alanine:2-oxoglutarate aminotransferase activity; GO:0030170,pyridoxal phosphate binding; GO:0009058,biosynthetic process; GO:0042853,L-alanine catabolic process	PF00155.21:Aminotransferase class I and II
gene-LOC100282851	NC_050099.1	171572673	171574387	+	1.83	2.86	2.21	1.07	0.62	0.24	-2.105	1.71041e-05	0.00126117	down	K22683 aspartyl protease family protein [EC:3.4.23.-] | (RAP-DB) Os01g0598600; Peptidase A1 domain containing protein. (A)	aspartic proteinase nepenthesin-2 [Zea mays]	RecName: Full=Aspartic proteinase nepenthesin-1; EC=3.4.23.12; AltName: Full=Nepenthesin-I; Flags: Precursor;	SubName: Full=Uncharacterized protein {ECO:0000313|EMBL:ACN29106.1};	Aspartyl protease	GO:0005576,extracellular region; GO:0004190,aspartic-type endopeptidase activity	PF14543.6:Xylanase inhibitor N-terminal
gene-LOC100283006	--	--	--	--	1.7	1.39	1.61	3.44	5.6	4.35	1.275	0.00106292	0.0329732	up	--
gene-LOC100283012	NC_050103.1	122929331	122930176	+	3.06	1.05	1.06	11.8	7.43	8.89	2.108	0.00109432	0.0337968	up	--	VQ motif family protein [Zea mays]	RecName: Full=Sigma factor binding protein 1, chloroplastic; Short=AtsibI; Short=Sigma factor binding protein I; AltName: Full=SigA binding protein; AltName: Full=VQ motif-containing protein 23 {ECO:0000303|PubMed:22535423}; Short=AtVQ23 {ECO:0000303|PubMed:22535423}; Flags: Precursor;	SubName: Full=Putative VQ motif family protein {ECO:0000313|EnsemblPlants:Zm00001d010661_P001}; SubName: Full=VQ motif family protein {ECO:0000313|EMBL:ACG35258.1};	--	GO:0009507,chloroplast; GO:0005634,nucleus; GO:0071482,cellular response to light stimulus; GO:0009816,defense response to bacterium, incompatible interaction; GO:0051091,positive regulation of DNA-binding transcription factor activity	PF05678.14:VQ motif
gene-LOC100283021	NC_050096.1	234149658	234150641	-	2.18	5.66	3.63	46.93	34.9	45.54	3.338	4.08735e-17	6.69735e-14	up	--	uncharacterized protein LOC100283021 precursor [Zea mays]	RecName: Full=Basic secretory protease {ECO:0000303|PubMed:22773449}; EC=3.4.24.- {ECO:0000269|PubMed:22773449}; AltName: Full=Boswellia basic secretory protease {ECO:0000303|PubMed:22773449}; Short=BBSP {ECO:0000303|PubMed:22773449}; Flags: Fragments;	SubName: Full=Secretory protein {ECO:0000313|EMBL:ACG35300.1};	--	GO:0046872,metal ion binding; GO:0008237,metallopeptidase activity	PF04450.12:Peptidase of plants and bacteria
gene-LOC100283035	NC_050103.1	70852146	70853829	+	185.76	319.77	329.29	171.51	154.11	75.44	-1.292	7.50985e-06	0.000638315	down	--	uncharacterized protein LOC100283035 precursor [Zea mays]	RecName: Full=Fasciclin-like arabinogalactan protein 6; Flags: Precursor;	SubName: Full=Fasciclin-like arabinogalactan protein 7 {ECO:0000313|EMBL:AQK92154.1};	--	GO:0031225,anchored component of membrane; GO:0005886,plasma membrane	PF02469.22:Fasciclin domain
gene-LOC100283078	NC_050099.1	201347564	201350550	-	1.57	3.54	1.06	9.24	4.95	13.12	2.04	0.00145463	0.0416943	up	K13667 protein glucosyltransferase [EC:2.4.1.-] | (RefSeq) O-glucosyltransferase rumi (A)	uncharacterized protein LOC100283078 [Zea mays]	--	SubName: Full=Lipopolysaccharide-modifying protein {ECO:0000313|EMBL:AQK57939.1};	Endoplasmic reticulum protein EP58, contains filamin rod domain and KDEL motif	GO:0016021,integral component of membrane	PF05686.12:Glycosyl transferase family 90
gene-LOC100283138	NC_050098.1	12144653	12145961	+	1.68	1.92	3.25	0.74	0.42	0.79	-1.972	7.58692e-05	0.0042832	down	K22312 hydroxyjasmonate sulfotransferase [EC:2.8.2.39] | (RAP-DB) Os04g0526300; Sulfotransferase family protein. (A)	flavonol sulfotransferase-like [Zea mays]	RecName: Full=Cytosolic sulfotransferase 14; Short=AtSOT14; EC=2.8.2.-; AltName: Full=Sulfotransferase 2b; Short=AtST2b;	RecName: Full=Sulfotransferase {ECO:0000256|RuleBase:RU361155}; EC=2.8.2.- {ECO:0000256|RuleBase:RU361155};	Sulfotransferase	GO:0005737,cytoplasm; GO:0008146,sulfotransferase activity	PF00685.27:Sulfotransferase domain
gene-LOC100283148	NC_050099.1	53715304	53717388	-	0.61	0.69	1.58	4.83	7.82	1.87	2.059	0.000231163	0.0103302	up	K24028 salicylic acid 3-hydroxylase [EC:1.14.11.-] | (RefSeq) protein DMR6-LIKE OXYGENASE 1-like isoform X1 (A)	gibberellin 20 oxidase 2 [Zea mays]	RecName: Full=Protein DMR6-LIKE OXYGENASE 2 {ECO:0000303|PubMed:25376907}; EC=1.14.11.- {ECO:0000255|PROSITE-ProRule:PRU00805}; AltName: Full=2-oxoglutarate (2OG)-Fe(II) oxygenase-like protein DLO2 {ECO:0000303|PubMed:25376907}; AltName: Full=Salicylate 3-hydroxylase DLO2 {ECO:0000305}; Short=S3H DLO2 {ECO:0000305}; Short=SA 3-hydroxylase DLO2 {ECO:0000305}; Short=Salicylic acid 3-hydroxylase DLO…	SubName: Full=Gibberellin 20 oxidase 2 {ECO:0000313|EMBL:ACG35712.1};	Iron/ascorbate family oxidoreductases	GO:0051213,dioxygenase activity; GO:0046872,metal ion binding; GO:0002229,defense response to oomycetes; GO:0046244,salicylic acid catabolic process	PF03171.20:2OG-Fe(II) oxygenase superfamily
gene-LOC100283216	NC_050105.1	45241423	45242277	-	58.35	33.29	27.18	9.88	6.59	9.33	-2.489	4.14179e-06	0.000385357	down	--	Retrotransposon protein SINE subclass [Zea mays]	--	SubName: Full=Retrotransposon protein SINE subclass {ECO:0000313|EMBL:AQK40671.1};	--	GO:0016021,integral component of membrane	PF15312.6:Junctional sarcoplasmic reticulum protein
gene-LOC100283314	NC_050104.1	115061622	115062673	+	6.18	8.8	3.46	21.6	16.19	37.56	1.889	0.00157719	0.0443448	up	--	VQ motif family protein [Zea mays]	RecName: Full=VQ motif-containing protein 22 {ECO:0000303|PubMed:22535423}; Short=AtVQ22 {ECO:0000303|PubMed:22535423};	SubName: Full=VQ motif family protein {ECO:0000313|EMBL:ACG26358.1};	--	GO:0005634,nucleus	PF05678.14:VQ motif
gene-LOC100283318	NC_050097.1	12342622	12344083	+	16.26	27.66	21.65	6.15	6.48	11.53	-1.553	0.000782798	0.0269089	down	K14504 xyloglucan:xyloglucosyl transferase TCH4 [EC:2.4.1.207] | (RefSeq) xyloglucan endotransglucosylase/hydrolase protein 15 precursor (A)	xyloglucan endotransglucosylase/hydrolase protein 15 precursor [Zea mays]	RecName: Full=Xyloglucan endotransglucosylase/hydrolase protein 24; Short=At-XTH24; Short=XTH-24; EC=2.4.1.207; AltName: Full=Endo-xyloglucan transferase; AltName: Full=Meristem protein 5; Short=MERI-5 protein; Short=MERI5 protein; AltName: Full=Xyloglucan endo-1,4-beta-D-glucanase; Flags: Precursor;	RecName: Full=Xyloglucan endotransglucosylase/hydrolase {ECO:0000256|RuleBase:RU361120}; EC=2.4.1.207 {ECO:0000256|RuleBase:RU361120};	--	GO:0048046,apoplast; GO:0005618,cell wall; GO:0005737,cytoplasm; GO:0005794,Golgi apparatus; GO:0009505,plant-type cell wall; GO:0005886,plasma membrane; GO:0004553,hydrolase activity, hydrolyzing O-glycosyl compounds; GO:0016762,xyloglucan:xyloglucosyl transferase activity; GO:0042546,cell wall biogenesis; GO:0009828,plant-type cell wall loosening; GO:0071669,plant-type cell wall organization or…	PF00722.21:Glycosyl hydrolases family 16
gene-LOC100283357	NC_050096.1	203992137	203993150	+	3.53	7.26	2.38	0.1	0.79	0.61	-3.309	1.36692e-05	0.00104716	down	K09286 EREBP-like factor | (RefSeq) ethylene-responsive transcription factor ERF073 (A)	AP2 domain containing protein [Zea mays]	RecName: Full=Ethylene-responsive transcription factor ERF109;	SubName: Full=AP2 domain containing protein {ECO:0000313|EMBL:ONM03673.1}; SubName: Full=AP2-EREBP transcription factor {ECO:0000313|EMBL:AIB05018.1}; Flags: Fragment;	--	GO:0005634,nucleus; GO:0003677,DNA binding; GO:0003700,DNA-binding transcription factor activity; GO:0051301,cell division; GO:0050832,defense response to fungus; GO:0009873,ethylene-activated signaling pathway; GO:0010087,phloem or xylem histogenesis; GO:0010200,response to chitin; GO:0006351,transcription, DNA-templated	PF00847.20:AP2 domain
gene-LOC100283408	NC_050097.1	195305140	195309321	-	5.16	10.45	9.88	20.04	20.73	21.19	1.131	0.000120811	0.00620764	up	--	uncharacterized protein LOC100283408 isoform X1 [Zea mays]	RecName: Full=AT-hook motif nuclear-localized protein 10 {ECO:0000312|EMBL:FAA00281.1}; AltName: Full=AT-hook protein 1 {ECO:0000312|EMBL:CAA10857.1};	SubName: Full=DNA binding protein {ECO:0000313|EMBL:ONM22619.1};	--	GO:0005829,cytosol; GO:0005634,nucleus; GO:0003677,DNA binding; GO:0006355,regulation of transcription, DNA-templated; GO:0006351,transcription, DNA-templated	PF03479.15:Plants and Prokaryotes Conserved (PCC) domain
gene-LOC100283462	NC_050102.1	140341856	140344248	-	3.52	7.19	7.35	29.77	20.8	39.88	2.229	8.68819e-07	9.90474e-05	up	K00306 sarcosine oxidase / L-pipecolate oxidase [EC:1.5.3.1 1.5.3.7] | (RefSeq) pco143515; uncharacterized protein LOC100283462 (A)	unknown [Zea mays]	RecName: Full=Probable sarcosine oxidase; EC=1.5.3.1;	SubName: Full=Putative sarcosine oxidase {ECO:0000313|EMBL:ONM56034.1};	FAD-dependent oxidoreductase	GO:0008115,sarcosine oxidase activity; GO:0046653,tetrahydrofolate metabolic process	PF01266.24:FAD dependent oxidoreductase
gene-LOC100283571	NC_050104.1	139100602	139102165	-	1.09	2.79	1.55	5.75	5.5	7.45	1.657	0.000208541	0.00953598	up	K11982 E3 ubiquitin-protein ligase RNF115/126 [EC:2.3.2.27] | (RefSeq) E3 ubiquitin-protein ligase RING1-like (A)	protein binding protein [Zea mays]	RecName: Full=E3 ubiquitin-protein ligase SIRP1 {ECO:0000305}; EC=2.3.2.27 {ECO:0000269|PubMed:27118216}; AltName: Full=Salt-induced RING finger protein 1 {ECO:0000303|PubMed:27118216}; Short=OsSIRP1 {ECO:0000303|PubMed:27118216};	SubName: Full=Protein binding protein {ECO:0000313|EMBL:ACG37294.1};	FOG: Predicted E3 ubiquitin ligase	GO:0005737,cytoplasm; GO:0046872,metal ion binding; GO:0061630,ubiquitin protein ligase activity; GO:0043161,proteasome-mediated ubiquitin-dependent protein catabolic process; GO:0000209,protein polyubiquitination; GO:0042787,NA	PF13639.6:Ring finger domain
gene-LOC100283578	NC_050101.1	121688098	121692505	+	0.25	0.32	0.32	1.33	1.96	1.04	2.048	1.40969e-07	2.15427e-05	up	K14432 ABA responsive element binding factor | (RefSeq) bZIP transcription factor family protein (A)	bZIP transcription factor family protein isoform X1 [Zea mays]	RecName: Full=bZIP transcription factor 46 {ECO:0000305}; Short=OsBZIP46 {ECO:0000303|PubMed:18065552}; AltName: Full=AREB/ABF-family transcription factor 8 {ECO:0000303|PubMed:19947981}; Short=OsAREB8 {ECO:0000303|PubMed:19947981}; AltName: Full=Abscisic acid responsive elements-binding factor 2 {ECO:0000303|PubMed:20576316}; Short=ABRE-binding factor 2 {ECO:0000303|PubMed:20576316}; Short=OsABF…	SubName: Full=Putative bZIP transcription factor superfamily protein {ECO:0000313|EMBL:AQK83200.1};	--	GO:0005634,nucleus; GO:0003677,DNA binding; GO:0003700,DNA-binding transcription factor activity; GO:0009738,abscisic acid-activated signaling pathway; GO:0006351,transcription, DNA-templated	PF00170.21:bZIP transcription factor
gene-LOC100283607	NC_050098.1	206431170	206433848	-	31.69	95.33	158.54	42.13	23.85	12.41	-2.045	0.000352535	0.0143813	down	K00679 phospholipid:diacylglycerol acyltransferase [EC:2.3.1.158] | (RefSeq) hypothetical protein (A)	unknown [Zea mays]	RecName: Full=GDSL esterase/lipase At5g45670; EC=3.1.1.-; AltName: Full=Extracellular lipase At5g45670; Flags: Precursor;	SubName: Full=GDSL esterase/lipase {ECO:0000313|EMBL:ONM38518.1};	--	GO:0005576,extracellular region; GO:0016788,hydrolase activity, acting on ester bonds; GO:0016042,lipid catabolic process	PF00657.22:GDSL-like Lipase/Acylhydrolase
gene-LOC100283788	NC_050098.1	184484968	184485752	+	11.07	8.32	16.84	26.44	68.92	38.99	1.654	0.000472649	0.0182226	up	--	uncharacterized protein LOC100283788 precursor [Zea mays]	--	SubName: Full=Lipid binding protein {ECO:0000313|EMBL:ACG38078.1};	--	--	PF14368.6:Probable lipid transfer
gene-LOC100283880	NC_050103.1	177733139	177738540	-	1.29	0.9	0.53	6.09	4.87	7.25	2.504	8.71759e-06	0.000720215	up	--	VQ motif family protein [Zea mays]	RecName: Full=Sigma factor binding protein 1, chloroplastic; Short=AtsibI; Short=Sigma factor binding protein I; AltName: Full=SigA binding protein; AltName: Full=VQ motif-containing protein 23 {ECO:0000303|PubMed:22535423}; Short=AtVQ23 {ECO:0000303|PubMed:22535423}; Flags: Precursor;	SubName: Full=Uncharacterized protein {ECO:0000313|EMBL:AQK99841.1, ECO:0000313|EnsemblPlants:Zm00001d012551_P001};	--	GO:0009507,chloroplast; GO:0005634,nucleus; GO:0071482,cellular response to light stimulus; GO:0009816,defense response to bacterium, incompatible interaction; GO:0051091,positive regulation of DNA-binding transcription factor activity	PF05678.14:VQ motif
gene-LOC100283948	NC_050102.1	131179197	131182895	+	0.43	1.87	0.45	4.28	3.28	4.79	2.058	0.00122094	0.0367813	up	K09419 heat shock transcription factor, other eukaryote | (RefSeq) heat shock factor protein 4 (A)	HSF transcription factor, partial [Zea mays]	RecName: Full=Heat stress transcription factor B-1; AltName: Full=Heat stress transcription factor 23; Short=OsHsf-23;	SubName: Full=HSF transcription factor {ECO:0000313|EMBL:AIB05245.1}; SubName: Full=Heat shock factor protein 4 {ECO:0000313|EMBL:ONM55458.1}; Flags: Fragment;	Heat shock transcription factor	GO:0005737,cytoplasm; GO:0005634,nucleus; GO:0003700,DNA-binding transcription factor activity; GO:0043565,sequence-specific DNA binding; GO:0045892,negative regulation of transcription, DNA-templated; GO:0009408,response to heat; GO:0006351,transcription, DNA-templated	PF00447.17:HSF-type DNA-binding
gene-LOC100283960	NC_050101.1	146057421	146058235	+	5.32	1.79	1.38	0.52	0.51	0.38	-2.973	0.000279793	0.0120295	down	--	Pollen allergen Phl p 11 [Zea mays]	RecName: Full=Pollen allergen Phl p 11; AltName: Allergen=Phl p 11;	SubName: Full=Pollen allergen Phl p 11 {ECO:0000313|EMBL:AQK84926.1};	--	GO:0005615,extracellular space	PF01190.17:Pollen proteins Ole e I like
gene-LOC100283977	NC_050103.1	168500301	168501735	+	13.45	11.77	11.97	7.99	6.68	6.03	-1.098	0.000523263	0.0197861	down	K23541 Ca2+/H+ antiporter, TMEM165/GDT1 family | (RefSeq) LOW QUALITY PROTEIN: uncharacterized protein LOC105051209 (A)	Wiscott-Aldrich syndrome [Zea mays]	RecName: Full=CRIB domain-containing protein RIC7; AltName: Full=ROP-interactive CRIB motif-containing protein 7; AltName: Full=Target of ROP protein RIC7;	SubName: Full=Wiscott-Aldrich syndrome {ECO:0000313|EMBL:AQK98699.1};	--	GO:0005737,cytoplasm; GO:0005634,nucleus; GO:0005886,plasma membrane; GO:0040008,regulation of growth; GO:0009416,response to light stimulus	PF00786.28:P21-Rho-binding domain
gene-LOC100284066	NC_050098.1	52363543	52365585	+	5.2	5.1	7.48	11.4	18.29	15.01	1.127	0.00095496	0.0306481	up	K01213 galacturan 1,4-alpha-galacturonidase [EC:3.2.1.67] | (RefSeq) polygalacturonase At1g48100-like (A)	Polygalacturonase [Zea mays]	RecName: Full=Polygalacturonase At1g48100; Short=PG; EC=3.2.1.15; AltName: Full=Pectinase At1g48100; Flags: Precursor;	SubName: Full=Polygalacturonase {ECO:0000313|EMBL:ONM31613.1};	--	GO:0005618,cell wall; GO:0005576,extracellular region; GO:0004650,polygalacturonase activity; GO:0005975,carbohydrate metabolic process; GO:0009831,plant-type cell wall modification involved in multidimensional cell growth	PF00295.17:Glycosyl hydrolases family 28
gene-LOC100284155	NC_050103.1	128450022	128450739	+	11.29	42.8	13.17	174.42	92.04	206.04	2.731	1.17506e-05	0.000919291	up	--	uncharacterized protein LOC100303799 [Zea mays]	--	SubName: Full=AtS40-3 {ECO:0000313|EMBL:AQK95014.1};	--	--	PF04520.13:Senescence regulator
gene-LOC100284161	NC_050102.1	79172312	79173503	+	12.63	28.19	19.58	46.9	51.22	59.41	1.246	0.000540241	0.0202721	up	K13459 disease resistance protein RPS2 | (RefSeq) probable disease resistance protein At5g63020 (A)	heavy metal-associated domain containing protein [Zea mays]	RecName: Full=Heavy metal-associated isoprenylated plant protein 46 {ECO:0000303|PubMed:21072340, ECO:0000303|PubMed:23368984}; Short=AtHIP46 {ECO:0000303|PubMed:21072340, ECO:0000303|PubMed:23368984}; AltName: Full=Farnesylated protein 5 {ECO:0000303|PubMed:8837031}; Short=AtFP5 {ECO:0000303|PubMed:8837031}; Flags: Precursor;	SubName: Full=Heavy metal-associated domain containing protein {ECO:0000313|EMBL:ACG39424.1, ECO:0000313|EnsemblPlants:Zm00001d019936_P001};	--	GO:0005737,cytoplasm; GO:0046914,transition metal ion binding; GO:0046916,cellular transition metal ion homeostasis; GO:0030001,metal ion transport	--
gene-LOC100284183	NC_050102.1	146013228	146014935	+	7.93	13.03	6.57	49.76	35.61	65.24	2.304	1.44266e-06	0.000152508	up	K13691 pathogen-inducible salicylic acid glucosyltransferase [EC:2.4.1.-] | (RefSeq) indole-3-acetate beta-glucosyltransferase (A)	unknown [Zea mays]	RecName: Full=UDP-glucosyltransferase UGT13248 {ECO:0000305}; Short=HvUGT13248 {ECO:0000303|PubMed:20521959}; EC=2.4.1.- {ECO:0000269|PubMed:20521959}; AltName: Full=Deoxynivalenol-UDP-glucosyltransferase {ECO:0000303|PubMed:20521959};	RecName: Full=Glycosyltransferase {ECO:0000256|RuleBase:RU362057}; EC=2.4.1.- {ECO:0000256|RuleBase:RU362057};	UDP-glucuronosyl and UDP-glucosyl transferase	GO:0000166,nucleotide binding; GO:0016758,transferase activity, transferring hexosyl groups; GO:0008194,UDP-glycosyltransferase activity; GO:0098754,detoxification; GO:0008152,metabolic process	PF00201.18:UDP-glucoronosyl and UDP-glucosyl transferase
gene-LOC100284274	NC_050096.1	205011045	205012819	-	41.3	63.38	76.18	202.45	248	310.53	1.942	1.28848e-07	2.01072e-05	up	K15104 solute carrier family 25 (mitochondrial oxoglutarate transporter), member 11 | (RefSeq) mitochondrial 2-oxoglutarate/malate carrier protein (A)	Mitochondrial 2-oxoglutarate/malate carrier protein [Zea mays]	RecName: Full=Mitochondrial uncoupling protein 4; Short=AtPUMP4; AltName: Full=Mitochondrial dicarboxylate carrier 2;	SubName: Full=Mitochondrial 2-oxoglutarate/malate carrier protein {ECO:0000313|EMBL:ONM03746.1};	Mitochondrial oxoglutarate/malate carrier proteins	GO:0016021,integral component of membrane; GO:0005743,mitochondrial inner membrane; GO:0015297,antiporter activity; GO:0005310,dicarboxylic acid transmembrane transporter activity; GO:0015140,malate transmembrane transporter activity; GO:0015131,oxaloacetate transmembrane transporter activity; GO:0015141,succinate transmembrane transporter activity; GO:0015116,sulfate transmembrane transporter ac…	PF00153.27:Mitochondrial carrier protein
gene-LOC100284275	NC_050101.1	5904349	5905733	-	73.87	57.59	63.58	41.49	34.76	34.86	-1.065	0.00183819	0.0488869	down	--	uncharacterized LOC100284275 [Zea mays]	RecName: Full=NDR1/HIN1-like protein 1 {ECO:0000303|Ref.1};	SubName: Full=VAMP protein SEC22 {ECO:0000313|EMBL:ACG39875.1};	--	GO:0046658,anchored component of plasma membrane; GO:0016021,integral component of membrane; GO:0009506,plasmodesma; GO:0004871,NA; GO:0051607,defense response to virus	PF03168.13:Late embryogenesis abundant protein
gene-LOC100284292	NC_050099.1	192870610	192871877	-	5.43	6.33	7.76	14.18	21.92	16.19	1.213	2.34128e-05	0.00163635	up	K01807 ribose 5-phosphate isomerase A [EC:5.3.1.6] | (RefSeq) ribose-5-phosphate isomerase (A)	ribose-5-phosphate isomerase [Zea mays]	RecName: Full=Probable ribose-5-phosphate isomerase 2; EC=5.3.1.6; AltName: Full=Phosphoriboisomerase 2;	SubName: Full=Uncharacterized protein {ECO:0000313|EMBL:ACN31522.1};	Ribose 5-phosphate isomerase	GO:0005737,cytoplasm; GO:0004751,ribose-5-phosphate isomerase activity; GO:0008219,cell death; GO:0009052,pentose-phosphate shunt, non-oxidative branch; GO:0010228,vegetative to reproductive phase transition of meristem	PF06026.14:Ribose 5-phosphate isomerase A (phosphoriboisomerase A)
gene-LOC100284317	NC_050097.1	37967827	37976136	-	48.81	60.71	58.13	31.97	29.02	26.15	-1.159	1.58833e-08	3.16528e-06	down	K00036 glucose-6-phosphate 1-dehydrogenase [EC:1.1.1.49 1.1.1.363] | (RefSeq) glucose-6-phosphate 1-dehydrogenase, cytoplasmic isoform (A)	glucose-6-phosphate 1-dehydrogenase, cytoplasmic isoform [Zea mays]	RecName: Full=Glucose-6-phosphate 1-dehydrogenase, cytoplasmic isoform; Short=G6PD; EC=1.1.1.49;	RecName: Full=Glucose-6-phosphate 1-dehydrogenase {ECO:0000256|RuleBase:RU362120}; EC=1.1.1.49 {ECO:0000256|RuleBase:RU362120};	Glucose-6-phosphate 1-dehydrogenase	GO:0005737,cytoplasm; GO:0004345,glucose-6-phosphate dehydrogenase activity; GO:0050661,NADP binding; GO:0006006,glucose metabolic process; GO:0006098,pentose-phosphate shunt	PF02781.16:Glucose-6-phosphate dehydrogenase, C-terminal domain
gene-LOC100284404	NC_050105.1	143854932	143856808	+	13.91	17.9	19.95	9.11	11.03	4.03	-1.37	2.11442e-05	0.00150635	down	K13065 shikimate O-hydroxycinnamoyltransferase [EC:2.3.1.133] | (RefSeq) agmatine coumaroyltransferase-2-like (A)	transferase [Zea mays]	RecName: Full=Shikimate O-hydroxycinnamoyltransferase; EC=2.3.1.133; AltName: Full=Hydroxycinnamoyl transferase; AltName: Full=Hydroxycinnamoyl-Coenzyme A shikimate/quinate hydroxycinnamoyltransferase;	SubName: Full=Transferase {ECO:0000313|EMBL:ACG40329.1};	--	GO:0047172,shikimate O-hydroxycinnamoyltransferase activity	PF02458.15:Transferase family
gene-LOC100284418	NC_050097.1	204440608	204441490	-	0.18	0.36	0.23	1.72	2.98	7.16	3.906	1.41794e-05	0.00107786	up	K02927 large subunit ribosomal protein L40e | (RefSeq) UBiQuitin family member (A)	UBiQuitin family member [Zea mays]	RecName: Full=Ubiquitin-60S ribosomal protein L40-2; Contains: RecName: Full=Ubiquitin; Contains: RecName: Full=60S ribosomal protein L40-2; AltName: Full=CEP52; Flags: Precursor;	SubName: Full=UBiQuitin family member {ECO:0000313|EMBL:ACG40371.1};	Ubiquitin/60s ribosomal protein L40 fusion	GO:0005634,nucleus; GO:0005840,ribosome; GO:0003735,structural constituent of ribosome; GO:0006412,translation	PF01020.17:Ribosomal L40e family
gene-LOC100284433	NC_050104.1	156711115	156711996	-	7.75	29.21	16.57	2.66	3.93	4.47	-2.373	4.20917e-06	0.000390394	down	K13464 jasmonate ZIM domain-containing protein | (RefSeq) ZIM4; ZIM motif family protein (A)	ZIM motif family protein [Zea mays]	RecName: Full=Protein TIFY 11b {ECO:0000305}; Short=OsTIFY11b {ECO:0000303|PubMed:19618278}; AltName: Full=Jasmonate ZIM domain-containing protein 10 {ECO:0000305}; Short=OsJAZ10 {ECO:0000303|PubMed:19618278}; AltName: Full=OsJAZ4 {ECO:0000303|PubMed:23320078};	SubName: Full=Putative tify domain/CCT motif transcription factor family protein {ECO:0000313|EMBL:AQL09249.1}; SubName: Full=TIFY28 {ECO:0000313|EMBL:AND66112.1}; SubName: Full=ZIM motif family protein {ECO:0000313|EMBL:ACG40443.1}; SubName: Full=ZIM transcription factor {ECO:0000313|EMBL:AIB05493.1};	--	GO:0005634,nucleus; GO:0003714,transcription corepressor activity; GO:1903507,negative regulation of nucleic acid-templated transcription; GO:0031347,regulation of defense response; GO:2000022,regulation of jasmonic acid mediated signaling pathway; GO:0006355,regulation of transcription, DNA-templated; GO:0009611,response to wounding; GO:0006351,transcription, DNA-templated	PF06200.14:tify domain
gene-LOC100284454	NC_050102.1	120434053	120435933	-	7.88	9.84	11.16	21.67	23.75	29.66	1.217	0.000343042	0.0140523	up	K07198 5'-AMP-activated protein kinase, catalytic alpha subunit [EC:2.7.11.11] | (RefSeq) CBL-interacting serine/threonine-protein kinase 5 (A)	CIPK-like protein 1 [Zea mays]	RecName: Full=CBL-interacting protein kinase 16; EC=2.7.11.1; AltName: Full=OsCIPK16;	RecName: Full=Non-specific serine/threonine protein kinase {ECO:0000256|SAAS:SAAS00351747}; EC=2.7.11.1 {ECO:0000256|SAAS:SAAS00351747};	Serine/threonine protein kinase	GO:0005622,intracellular; GO:0005524,ATP binding; GO:0004674,protein serine/threonine kinase activity; GO:0035556,intracellular signal transduction; GO:0018105,peptidyl-serine phosphorylation; GO:0018107,peptidyl-threonine phosphorylation	PF00069.25:Protein kinase domain
gene-LOC100284468	NC_050098.1	43117752	43125511	+	209.44	168.27	147.94	55.09	45.51	51.97	-2.035	1.53119e-07	2.29243e-05	down	K12818 ATP-dependent RNA helicase DHX8/PRP22 [EC:3.6.4.13] | (RefSeq) hypothetical protein (A)	Carbohydrate transporter/ sugar porter/ transporter [Zea mays]	RecName: Full=Probable peptide/nitrate transporter At3g43790; AltName: Full=Protein ZINC INDUCED FACILITATOR-LIKE 2;	SubName: Full=Carbohydrate transporter/ sugar porter/ transporter {ECO:0000313|EMBL:ONM31315.1};	Permease of the major facilitator superfamily	GO:0016021,integral component of membrane; GO:0009705,plant-type vacuole membrane; GO:0005886,plasma membrane; GO:0022821,potassium ion antiporter activity; GO:0090333,regulation of stomatal closure; GO:0009624,response to nematode	PF07690.16:Major Facilitator Superfamily
gene-LOC100284471	NC_050097.1	173201429	173203151	+	1.26	1.87	1.5	8.45	6.82	10.61	2.33	7.16824e-07	8.38969e-05	up	K03009 DNA-directed RNA polymerases I, II, and III subunit RPABC4 | (RefSeq) DNA-directed RNA polymerases I, II, and III 7.3 kDa polypeptide (A)	DNA-directed RNA polymerases I, II, and III 7.3 kDa polypeptide [Zea mays]	RecName: Full=DNA-directed RNA polymerases II, IV and V subunit 12; AltName: Full=DNA-directed RNA Polymerase II subunit K;	SubName: Full=DNA-directed RNA polymerases I, II, and III 7.3 kDa polypeptide {ECO:0000313|EMBL:ACG40614.1};	DNA-directed RNA polymerase, subunit RPB7.0	GO:0005736,RNA polymerase I complex; GO:0005665,RNA polymerase II, core complex; GO:0005666,RNA polymerase III complex; GO:0000418,RNA polymerase IV complex; GO:0000419,RNA polymerase V complex; GO:0003677,DNA binding; GO:0003899,DNA-directed 5'-3' RNA polymerase activity; GO:0046872,metal ion binding; GO:0006360,transcription by RNA polymerase I; GO:0006366,transcription by RNA polymerase II; GO…	PF03604.13:DNA directed RNA polymerase, 7 kDa subunit
gene-LOC100284473	NC_050103.1	5354392	5358231	+	14.2	14.72	16.63	9.51	10.73	5.03	-1.125	6.05591e-05	0.00357226	down	--	rapid alkalinization factor 1 precursor [Zea mays]	RecName: Full=Rapid alkalinization factor; Short=NtRALF; Flags: Precursor;	SubName: Full=Rapid alkalinization factor 1 {ECO:0000313|EMBL:ACG40616.1};	--	GO:0005576,extracellular region; GO:0005622,intracellular; GO:0005179,hormone activity; GO:0004871,NA; GO:0019722,calcium-mediated signaling	PF05498.11:Rapid ALkalinization Factor (RALF)
gene-LOC100284491	NC_050100.1	203737964	203739021	+	3.07	3.58	0.94	0.1	0.24	0.34	-3.711	6.60164e-06	0.000579491	down	K09286 EREBP-like factor | (RefSeq) dehydration-responsive element-binding protein 1B-like (A)	dehydration-responsive element-binding protein 1A [Zea mays]	RecName: Full=Dehydration-responsive element-binding protein 1G; Short=Protein DREB1G;	SubName: Full=Dehydration-responsive element-binding protein 1A {ECO:0000313|EMBL:AQK73516.1};	--	GO:0005634,nucleus; GO:0003677,DNA binding; GO:0003700,DNA-binding transcription factor activity; GO:0006351,transcription, DNA-templated	PF00847.20:AP2 domain
gene-LOC100284530	NC_050096.1	300186309	300187252	+	0.88	1.06	0.45	10.85	12.94	20.87	4.069	4.79549e-12	2.20997e-09	up	--	ZFP16-2 [Zea mays]	RecName: Full=Zinc finger protein ZAT12; AltName: Full=Protein RESPONSIVE TO HIGH LIGHT 41;	SubName: Full=ZFP16-2 {ECO:0000313|EMBL:ONM10910.1};	FOG: Zn-finger	GO:0005634,nucleus; GO:0003700,DNA-binding transcription factor activity; GO:0046872,metal ion binding; GO:0043565,sequence-specific DNA binding; GO:0009631,cold acclimation; GO:0042538,hyperosmotic salinity response; GO:0009643,photosynthetic acclimation; GO:0010200,response to chitin; GO:0009409,response to cold; GO:0009408,response to heat; GO:0009416,response to light stimulus; GO:0006979,res…	PF13912.6:C2H2-type zinc finger
gene-LOC100284707	NC_050102.1	166654624	166657363	+	68.85	57.47	42.28	196.44	239.16	457.51	2.229	9.7606e-05	0.00522467	up	K03231 elongation factor 1-alpha | (RefSeq) elongation factor 1-alpha (A)	elongation factor 1-alpha [Zea mays]	RecName: Full=Elongation factor 1-alpha; Short=EF-1-alpha;	RecName: Full=Elongation factor 1-alpha {ECO:0000256|RuleBase:RU000325};	Translation elongation factor EF-1 alpha/Tu	GO:0005737,cytoplasm; GO:0005622,intracellular; GO:0005525,GTP binding; GO:0003924,GTPase activity; GO:0003746,translation elongation factor activity	PF00009.27:Elongation factor Tu GTP binding domain
gene-LOC100284713	NC_050097.1	116645653	116647124	+	0.26	0.83	0.42	4.5	1.47	3.95	2.604	7.26197e-05	0.00413483	up	--	legume lectins beta domain containing protein [Zea mays]	--	SubName: Full=Uncharacterized protein {ECO:0000313|EMBL:ACR36401.1};	--	GO:0030246,carbohydrate binding	PF00139.19:Legume lectin domain
gene-LOC100284751	NC_050105.1	114632712	114636142	+	0.68	1.71	1.45	4.78	4.42	3.38	1.525	2.71209e-06	0.000266634	up	K07766 diphosphoinositol-polyphosphate diphosphatase [EC:3.6.1.52] | (RefSeq) nudix hydrolase 13 (A)	nudix hydrolase 13 [Zea mays]	RecName: Full=Nudix hydrolase 13, mitochondrial; Short=AtNUDT13; EC=3.6.1.-; Flags: Precursor;	SubName: Full=Nudix hydrolase 13 {ECO:0000313|EMBL:ACG41674.1};	Diadenosine and diphosphoinositol polyphosphate phosphohydrolase	GO:0005739,mitochondrion; GO:0005634,nucleus; GO:0034432,bis(5'-adenosyl)-pentaphosphatase activity; GO:0016787,hydrolase activity; GO:0046872,metal ion binding	PF00293.28:NUDIX domain
gene-LOC100284758	NC_050103.1	35511308	35512603	+	6.2	14.86	7.12	80.69	62.42	152.31	3.315	7.64581e-09	1.62234e-06	up	K08869 aarF domain-containing kinase | (RefSeq) putative aarF domain-containing protein kinase 1 (A)	unknown [Zea mays]	--	SubName: Full=S-adenosyl-L-methionine-dependent methyltransferase superfamily protein {ECO:0000313|EMBL:AQK91318.1};	Methyltransferase	GO:0005739,mitochondrion; GO:0008168,methyltransferase activity; GO:0046686,response to cadmium ion	PF08241.12:Methyltransferase domain
gene-LOC100284800	NC_050096.1	84245847	84249829	+	4.16	4.09	4.23	49.18	39.99	85.57	3.665	2.88282e-13	1.77137e-10	up	K24028 salicylic acid 3-hydroxylase [EC:1.14.11.-] | (RefSeq) uncharacterized protein LOC100284800 (A)	gibberellin 20 oxidase 2 [Zea mays]	RecName: Full=Flavanone 3-dioxygenase 2 {ECO:0000305}; EC=1.14.11.9 {ECO:0000269|PubMed:18413994}; AltName: Full=Flavanone 3-beta-hydroxylase 2 {ECO:0000305}; AltName: Full=Flavanone 3-hydroxylase 2 {ECO:0000303|PubMed:18413994}; Short=OsF3H-2 {ECO:0000303|PubMed:18413994};	SubName: Full=Flavone synthase typeI1 {ECO:0000313|EMBL:ONL99521.1}; SubName: Full=Gibberellin 20 oxidase 2 {ECO:0000313|EMBL:ACG41840.1};	Iron/ascorbate family oxidoreductases	GO:0031418,L-ascorbic acid binding; GO:0046872,metal ion binding; GO:0045486,naringenin 3-dioxygenase activity; GO:0009813,flavonoid biosynthetic process	PF03171.20:2OG-Fe(II) oxygenase superfamily
gene-LOC100284818	NC_050105.1	77822525	77824697	+	14.63	27.58	21.88	1.45	2.41	3.74	-3.179	2.56034e-10	7.62774e-08	down	K13422 transcription factor MYC2 | (RefSeq) transcription factor MYC3-like isoform X1 (A)	DNA binding like [Zea mays]	RecName: Full=Transcription factor bHLH35; AltName: Full=Basic helix-loop-helix protein 35; Short=AtbHLH35; Short=bHLH 35; AltName: Full=Transcription factor EN 41; AltName: Full=bHLH transcription factor bHLH035;	SubName: Full=Putative HLH DNA-binding domain superfamily protein {ECO:0000313|EMBL:AQK41365.1};	--	GO:0005634,nucleus; GO:0003677,DNA binding; GO:0046983,protein dimerization activity; GO:0006355,regulation of transcription, DNA-templated; GO:0006351,transcription, DNA-templated	PF00010.26:Helix-loop-helix DNA-binding domain
gene-LOC100284905	NC_050096.1	14102615	14104574	-	35.02	12.07	12.08	7.17	6.35	5.84	-1.976	0.00154864	0.0437087	down	K14152 phosphoribosyl-ATP pyrophosphohydrolase / phosphoribosyl-AMP cyclohydrolase / histidinol dehydrogenase [EC:3.6.1.31 3.5.4.19 1.1.1.23] | (RefSeq) uncharacterized protein LOC111783531 (A)	pollenless 3 [Zea mays]	RecName: Full=Protein SULFUR DEFICIENCY-INDUCED 1 {ECO:0000303|PubMed:19154231}; Short=AtSDI1 {ECO:0000303|PubMed:19154231};	SubName: Full=Pollenless3 {ECO:0000313|EMBL:ACG42186.1};	--	GO:0090568,nuclear transcriptional repressor complex; GO:0010438,cellular response to sulfur starvation; GO:0010439,regulation of glucosinolate biosynthetic process; GO:0006792,regulation of sulfur utilization	PF00515.28:Tetratricopeptide repeat
gene-LOC100284932	NC_050102.1	176690892	176692081	+	0.05	0.22	0.05	3.1	0.39	1.15	3.721	0.000544817	0.0203919	up	K01166 ribonuclease T2 [EC:3.1.27.1] | (RefSeq) ribonuclease 1 precursor (A)	Ribonuclease 1 [Zea mays]	RecName: Full=Ribonuclease 1; EC=3.1.27.1; Flags: Precursor;	SubName: Full=Ribonuclease 1 {ECO:0000313|EMBL:ONM59902.1};	Ribonuclease, T2 family	GO:0005618,cell wall; GO:0005576,extracellular region; GO:0005886,plasma membrane; GO:0004540,ribonuclease activity; GO:0033897,ribonuclease T2 activity; GO:0003723,RNA binding; GO:0009718,anthocyanin-containing compound biosynthetic process; GO:0016036,cellular response to phosphate starvation; GO:0009611,response to wounding	PF00445.18:Ribonuclease T2 family
gene-LOC100284936	NC_050096.1	77051929	77052972	+	11.83	15.12	24.46	9.52	10.01	8.15	-1.082	0.000212213	0.00965899	down	K01188 beta-glucosidase [EC:3.2.1.21] | (RefSeq) beta-glucosidase 12-like (A)	polygalacturonase inhibitor 1 precursor [Zea mays]	RecName: Full=Polygalacturonase inhibitor; AltName: Full=Polygalacturonase-inhibiting protein; Short=PGIG; Flags: Precursor;	SubName: Full=Polygalacturonase inhibitor 1 {ECO:0000313|EMBL:ACG42310.1};	--	GO:0048046,apoplast; GO:0005618,cell wall	PF08263.12:Leucine rich repeat N-terminal domain
gene-LOC100284942	NC_050098.1	186676035	186677076	+	0.16	0	0.23	1.22	0.77	1.94	3.181	0.00089987	0.0293592	up	K14841 ribosome biogenesis protein NSA1 | (RefSeq) WD repeat-containing protein DDB_G0290555 (A)	Zinc finger, C2H2 type family protein [Zea mays]	RecName: Full=Zinc finger protein ZAT11;	SubName: Full=Zinc finger, C2H2 type family protein {ECO:0000313|EMBL:ONM36572.1};	FOG: Zn-finger	GO:0005634,nucleus; GO:0003700,DNA-binding transcription factor activity; GO:0046872,metal ion binding; GO:0003676,nucleic acid binding; GO:0071289,cellular response to nickel ion; GO:2000280,regulation of root development; GO:0006355,regulation of transcription, DNA-templated; GO:0010200,response to chitin; GO:0006351,transcription, DNA-templated	PF13912.6:C2H2-type zinc finger
gene-LOC100284970	NC_050096.1	181926766	181927606	-	0	0.73	0.45	3.82	2.99	2.1	2.768	0.00010526	0.00554921	up	K12173 BRCA1-A complex subunit BRE | (RefSeq) BRCA1-A complex subunit BRE-like (A)	uncharacterized protein LOC100284970 precursor [Zea mays]	RecName: Full=Thaumatin-like protein; Flags: Precursor;	SubName: Full=Osmotin-like protein OSM34 {ECO:0000313|EMBL:ONM02259.1}; SubName: Full=Thaumatin-like protein {ECO:0000313|EMBL:ACG42423.1};	--	GO:0005576,extracellular region	PF00314.17:Thaumatin family
gene-LOC100285037	NC_050097.1	997892	999010	-	3.73	3.95	1.83	1.2	0.97	0.84	-1.931	0.000262846	0.011485	down	K20855 beta-1,3-galactosyltransferase 1/2/3/4/5/7/8 [EC:2.4.1.-] | (RefSeq) probable beta-1,3-galactosyltransferase 4 isoform X1 (A)	casparian strip membrane protein 2 [Zea mays]	RecName: Full=Casparian strip membrane protein 2; Short=ZmCASP2;	RecName: Full=CASP-like protein {ECO:0000256|RuleBase:RU361233};	--	GO:0016021,integral component of membrane; GO:0005886,plasma membrane; GO:0071555,cell wall organization	PF04535.12:Domain of unknown function (DUF588)
gene-LOC100285073	NC_050100.1	223958229	223959925	-	6.09	16.71	30.81	8.77	6.51	4.01	-1.635	0.00174349	0.0471766	down	K00679 phospholipid:diacylglycerol acyltransferase [EC:2.3.1.158] | (RefSeq) hypothetical protein (A)	anther-specific proline-rich protein APG precursor [Zea mays]	RecName: Full=GDSL esterase/lipase At5g33370; EC=3.1.1.-; AltName: Full=Extracellular lipase At5g33370; Flags: Precursor;	SubName: Full=GDSL esterase/lipase LTL1 {ECO:0000313|EMBL:AQK76110.1};	--	GO:0005576,extracellular region; GO:0016788,hydrolase activity, acting on ester bonds; GO:0042335,cuticle development; GO:0016042,lipid catabolic process	PF00657.22:GDSL-like Lipase/Acylhydrolase
gene-LOC100285151	NC_050096.1	10549981	10558093	-	18	18.44	16.63	51.5	48.8	70.49	1.5	0.000134145	0.00676319	up	--	uncharacterized protein LOC100285151 isoform X2 [Zea mays]	RecName: Full=Silicon efflux transporter LSI3 {ECO:0000303|PubMed:26283388}; AltName: Full=Low silicon protein 3 {ECO:0000303|PubMed:26283388};	SubName: Full=Citrate transporter1 {ECO:0000313|EMBL:ONL93647.1};	Sodium sulfate symporter and related arsenite permeases	GO:0016021,integral component of membrane; GO:0005886,plasma membrane; GO:0055085,transmembrane transport	PF03600.16:Citrate transporter
gene-LOC100285183	NC_050096.1	255451516	255454307	+	37	52.64	51.94	33.65	31.37	14.99	-1.079	6.84753e-05	0.0039292	down	K15333 tRNA guanosine-2'-O-methyltransferase [EC:2.1.1.34] | (RefSeq) uncharacterized protein LOC104224633 (A)	subtilisin-like protease precursor [Zea mays]	RecName: Full=Subtilisin-like protease SBT1.7 {ECO:0000303|PubMed:16193095}; EC=3.4.21.- {ECO:0000305}; AltName: Full=Cucumisin-like serine protease; AltName: Full=Subtilase subfamily 1 member 7 {ECO:0000303|PubMed:16193095}; Short=AtSBT1.7 {ECO:0000303|PubMed:16193095}; AltName: Full=Subtilisin-like serine protease 1 {ECO:0000303|PubMed:12702015}; Short=At-SLP1 {ECO:0000303|PubMed:12702015}; Fla…	SubName: Full=Subtilisin-like protease {ECO:0000313|EMBL:ONM06952.1};	--	GO:0048046,apoplast; GO:0005618,cell wall; GO:0005576,extracellular region; GO:0009505,plant-type cell wall; GO:0004252,serine-type endopeptidase activity; GO:0080001,mucilage extrusion from seed coat; GO:0048359,mucilage metabolic process involved in seed coat development; GO:0010214,seed coat development	PF00082.22:Subtilase family
gene-LOC100285217	NC_050102.1	96759940	96761964	+	3.21	3.91	3.74	10.85	12.2	19.35	1.822	4.16142e-05	0.00263384	up	K13459 disease resistance protein RPS2 | (RefSeq) disease resistance protein At4g27190-like isoform X1 (A)	WRKY74 - superfamily of TFs having WRKY and zinc finger domains [Zea mays]	RecName: Full=Probable WRKY transcription factor 30; AltName: Full=WRKY DNA-binding protein 30;	SubName: Full=WRKY74-superfamily of TFs having WRKY and zinc finger domains {ECO:0000313|EMBL:ACG43427.1};	--	GO:0005737,cytoplasm; GO:0005634,nucleus; GO:0003700,DNA-binding transcription factor activity; GO:0043565,sequence-specific DNA binding; GO:0044212,transcription regulatory region DNA binding; GO:0042542,response to hydrogen peroxide; GO:0010193,response to ozone; GO:0009751,response to salicylic acid; GO:0006351,transcription, DNA-templated	PF03106.15:WRKY DNA -binding domain
gene-LOC100285247	NC_050102.1	182564966	182567497	-	3.1	5.98	3.16	19.98	11.49	31.21	2.258	6.45006e-05	0.00375964	up	K00521 ferric-chelate reductase [EC:1.16.1.7] | (RefSeq) ferric reduction oxidase 7, chloroplastic-like (A)	NAC domain transcription factor isoform X1 [Zea mays]	RecName: Full=NAC domain-containing protein 10 {ECO:0000303|PubMed:15029955}; Short=ONAC010 {ECO:0000303|PubMed:15029955}; AltName: Full=NAC transcription factor ONAC010 {ECO:0000305};	SubName: Full=NAC domain transcription factor {ECO:0000313|EMBL:ACG43517.1}; SubName: Full=Zma1158 {ECO:0000313|EMBL:AKQ09556.1};	--	GO:0005634,nucleus; GO:0003677,DNA binding; GO:0048653,anther development; GO:0009555,pollen development; GO:0006355,regulation of transcription, DNA-templated; GO:0006351,transcription, DNA-templated	PF02365.15:No apical meristem (NAM) protein
gene-LOC100285261	NC_050104.1	159546537	159557448	-	0.3	0.54	0.53	1	1.68	0.76	1.098	0.00165293	0.0456847	up	K20279 synaptojanin [EC:3.1.3.36] | (RefSeq) type IV inositol polyphosphate 5-phosphatase 3-like (A)	type I inositol-1,4,5-trisphosphate 5-phosphatase CVP2 isoform X1 [Zea mays]	RecName: Full=Type I inositol polyphosphate 5-phosphatase 4 {ECO:0000305}; Short=At5PTase4 {ECO:0000305}; EC=3.1.3.- {ECO:0000305};	SubName: Full=Type IV inositol polyphosphate 5-phosphatase 7 {ECO:0000313|EMBL:AQL09706.1};	Inositol polyphosphate 5-phosphatase and related proteins	GO:0016787,hydrolase activity; GO:0046856,phosphatidylinositol dephosphorylation	PF03372.23:Endonuclease/Exonuclease/phosphatase family
gene-LOC100285262	NC_050098.1	156796519	156797645	+	3.14	2.69	2.05	10.47	6.33	11.83	1.656	0.00118782	0.0359511	up	K20802 (R)-mandelonitrile lyase [EC:4.1.2.10] | (RefSeq) hypothetical protein (A)	Esterase PIR7B [Zea mays]	RecName: Full=Esterase PIR7B; EC=3.1.-.-;	SubName: Full=Esterase PIR7B {ECO:0000313|EMBL:ONM34792.1};	--	GO:0052689,carboxylic ester hydrolase activity; GO:0016787,hydrolase activity	PF12697.7:Alpha/beta hydrolase family
gene-LOC100285272	NC_050102.1	41471844	41474044	+	1.35	4.66	3.8	1.56	1.23	0.76	-1.644	0.000362639	0.0147121	down	--	desiccation-associated protein isoform X1 [Zea mays]	RecName: Full=CRIB domain-containing protein RIC5; AltName: Full=ROP-interactive CRIB motif-containing protein 5; AltName: Full=Target of ROP protein RIC5;	SubName: Full=Desiccation-associated protein {ECO:0000313|EMBL:ACG43608.1};	--	GO:0016324,apical plasma membrane; GO:0009860,pollen tube growth; GO:0040008,regulation of growth	PF00786.28:P21-Rho-binding domain
gene-LOC100285280	NC_050097.1	220358437	220359225	-	11.6	18.45	11.81	3.36	3.25	6.64	-1.781	0.000561482	0.0208569	down	K11982 E3 ubiquitin-protein ligase RNF115/126 [EC:2.3.2.27] | (RefSeq) E3 ubiquitin-protein ligase RING1-like (A)	Ubiquitin-protein ligase CIP8 [Zea mays]	RecName: Full=E3 ubiquitin-protein ligase MPSR1 {ECO:0000305}; EC=2.3.2.27 {ECO:0000269|PubMed:29087340}; AltName: Full=Protein MISFOLDED PROTEIN SENSING RING E3 LIGASE 1 {ECO:0000303|PubMed:29087340}; AltName: Full=RING-type E3 ubiquitin transferase MPSR1 {ECO:0000305};	SubName: Full=Ubiquitin-protein ligase CIP8 {ECO:0000313|EMBL:ONM25579.1};	FOG: Predicted E3 ubiquitin ligase	GO:0005737,cytoplasm; GO:0005829,cytosol; GO:0046872,metal ion binding; GO:0051787,misfolded protein binding; GO:0061630,ubiquitin protein ligase activity; GO:0061659,ubiquitin-like protein ligase activity; GO:0071218,cellular response to misfolded protein; GO:0071629,cytoplasm protein quality control by the ubiquitin-proteasome system; GO:0043161,proteasome-mediated ubiquitin-dependent protein c…	PF13639.6:Ring finger domain
gene-LOC100285310	NC_050096.1	153982123	153984364	-	0	0.06	0.1	1.69	4.38	0.32	5.029	6.49723e-05	0.00377967	up	K17991 peroxygenase [EC:1.11.2.3] | (RefSeq) calcium binding EF-hand protein precursor (A)	calcium binding EF-hand protein precursor [Zea mays]	RecName: Full=Probable peroxygenase 4; Short=AtPXG4; EC=1.11.2.3; AltName: Full=Caleosin-4;	SubName: Full=Calcium binding EF-hand protein {ECO:0000313|EMBL:ACG43821.1}; SubName: Full=Putative peroxygenase 4 {ECO:0000313|EMBL:ONM01356.1};	--	GO:0005811,lipid droplet; GO:0046872,metal ion binding; GO:1990137,plant seed peroxidase activity; GO:0009819,drought recovery; GO:0009737,response to abscisic acid	PF05042.13:Caleosin related protein
gene-LOC100285342	NC_050096.1	241263776	241264784	-	4.48	4.31	4.69	15.6	15.49	19.17	1.705	2.76243e-06	0.000270682	up	K00059 3-oxoacyl-[acyl-carrier protein] reductase [EC:1.1.1.100] | (RefSeq) umc2759; uncharacterized protein LOC100285342 (A)	uncharacterized protein LOC100285342 [Zea mays]	RecName: Full=NADPH-dependent aldehyde reductase-like protein, chloroplastic {ECO:0000250|UniProtKB:Q9SQR2}; EC=1.1.1.- {ECO:0000250|UniProtKB:Q9SQR2}; Flags: Precursor;	SubName: Full=Versicolorin reductase {ECO:0000313|EMBL:ACG44064.1};	Reductases with broad range of substrate specificities	GO:0009507,chloroplast; GO:0016491,oxidoreductase activity	PF13561.6:Enoyl-(Acyl carrier protein) reductase
gene-LOC100285447	NC_050102.1	148455102	148455912	+	0	0.07	0	0.63	0.43	1.15	4.861	0.00116389	0.0355729	up	--	hypothetical protein ZEAMMB73_Zm00001d021266 [Zea mays]	RecName: Full=BON1-associated protein 2; AltName: Full=Protein BON1-ASSOCIATED PROTEIN 1-LIKE;	SubName: Full=Uncharacterized protein {ECO:0000313|EMBL:ONM56654.1, ECO:0000313|EnsemblPlants:Zm00001d021266_P001};	--	GO:0016020,membrane; GO:0006952,defense response	--
gene-LOC100285450	NC_050104.1	18070650	18073421	-	2.85	5.24	4.12	18.37	11.97	30.19	2.221	3.70466e-05	0.00240144	up	--	Dirigent [Zea mays]	--	RecName: Full=Dirigent protein {ECO:0000256|RuleBase:RU363099};	--	GO:0048046,apoplast; GO:0016853,isomerase activity	PF03018.14:Dirigent-like protein
gene-LOC100285462	NC_050096.1	241254555	241255624	+	2.16	4.9	2.43	12.24	11.6	20.93	2.134	4.18839e-05	0.00264523	up	K00059 3-oxoacyl-[acyl-carrier protein] reductase [EC:1.1.1.100] | (RefSeq) versicolorin reductase (A)	versicolorin reductase [Zea mays]	RecName: Full=NADPH-dependent aldehyde reductase-like protein, chloroplastic {ECO:0000250|UniProtKB:Q9SQR2}; EC=1.1.1.- {ECO:0000250|UniProtKB:Q9SQR2}; Flags: Precursor;	SubName: Full=Versicolorin reductase {ECO:0000313|EMBL:ACG44476.1};	Reductases with broad range of substrate specificities	GO:0009507,chloroplast; GO:0016491,oxidoreductase activity	PF13561.6:Enoyl-(Acyl carrier protein) reductase
gene-LOC100285495	NC_050096.1	259739010	259740758	+	86.39	78.22	54.87	26.01	31.21	30.74	-1.567	9.67361e-05	0.00518752	down	K12761 carbon catabolite-derepressing protein kinase [EC:2.7.11.1] | (RefSeq) CBL-interacting serine/threonine-protein kinase 7-like (A)	CBL-interacting serine/threonine-protein kinase 15 [Zea mays]	RecName: Full=CBL-interacting protein kinase 7; EC=2.7.11.1; AltName: Full=OsCIPK07;	RecName: Full=Non-specific serine/threonine protein kinase {ECO:0000256|SAAS:SAAS00351747}; EC=2.7.11.1 {ECO:0000256|SAAS:SAAS00351747};	Serine/threonine protein kinase	GO:0005737,cytoplasm; GO:0005634,nucleus; GO:0005524,ATP binding; GO:0004674,protein serine/threonine kinase activity; GO:0035556,intracellular signal transduction; GO:0006468,protein phosphorylation	PF00069.25:Protein kinase domain
gene-LOC100285551	NC_050099.1	191434467	191435704	+	0.25	0.62	0.26	1.76	1.62	1.79	2.034	0.000491018	0.0188005	up	K02183 calmodulin | (RefSeq) calmodulin-related protein (A)	calmodulin-related protein [Zea mays]	RecName: Full=Putative calmodulin-like protein 2; Flags: Precursor;	SubName: Full=Calmodulin-related protein {ECO:0000313|EMBL:ACG44941.1};	Calmodulin and related proteins (EF-Hand superfamily)	GO:0016020,membrane; GO:0005509,calcium ion binding	PF00036.32:EF hand
gene-LOC100285556	NC_050097.1	7156711	7157260	+	6.21	7.3	22.36	5.28	3.84	2.73	-1.78	0.00102618	0.0322324	down	--	wound induced protein [Zea mays]	--	SubName: Full=Wound induced protein {ECO:0000313|EMBL:ACG44988.1}; SubName: Full=Wound-responsive family protein {ECO:0000313|EMBL:ONM13261.1};	--	--	PF12609.8:Wound-induced protein
gene-LOC100285633	NC_050097.1	235601624	235603597	+	0.7	1.15	0.6	1.85	3.32	5.81	2.056	0.00125113	0.0372358	up	--	Patatin-like protein 2 [Zea mays]	RecName: Full=Patatin-like protein 1; Short=OsPLP1; EC=3.1.1.-;	RecName: Full=Patatin {ECO:0000256|RuleBase:RU361262}; EC=3.1.1.- {ECO:0000256|RuleBase:RU361262};	Ca2+-independent phospholipase A2	GO:0005737,cytoplasm; GO:0016020,membrane; GO:0047372,acylglycerol lipase activity; GO:0004620,phospholipase activity; GO:0006952,defense response; GO:0016042,lipid catabolic process	PF01734.22:Patatin-like phospholipase
gene-LOC100285656	NC_050098.1	233262724	233266162	-	4.87	4.85	3.8	9.79	14.28	13.78	1.262	0.00109795	0.0338733	up	K09060 plant G-box-binding factor | (RefSeq) transcription factor HBP-1a-like (A)	bZIP transcription factor 44 [Zea mays]	RecName: Full=bZIP transcription factor 44 {ECO:0000305}; Short=AtbZIP44 {ECO:0000303|PubMed:11906833};	SubName: Full=BZIP transcription factor {ECO:0000313|EMBL:AIB05874.1}; SubName: Full=Common plant regulatory factor 7 {ECO:0000313|EMBL:ONM41538.1}; Flags: Fragment;	--	GO:0005634,nucleus; GO:0003700,DNA-binding transcription factor activity; GO:0046982,protein heterodimerization activity; GO:0043565,sequence-specific DNA binding; GO:0044212,transcription regulatory region DNA binding; GO:0009845,seed germination; GO:0006351,transcription, DNA-templated	PF00170.21:bZIP transcription factor
gene-LOC100285708	NC_050105.1	144620218	144621033	-	1.89	1.82	2.03	6.82	6.47	7.56	1.665	3.84092e-05	0.00248142	up	--	adhesive/proline-rich protein isoform X1 [Zea mays]	--	SubName: Full=Proline-rich family protein {ECO:0000313|EMBL:AQK46133.1};	--	--	PF12734.7:Cysteine-rich TM module stress tolerance
gene-LOC100285725	NC_050105.1	14246171	14249037	+	3.15	5.94	4.15	34.72	23.63	58.7	3.056	8.7839e-09	1.82445e-06	up	--	ABA-responsive protein [Zea mays]	RecName: Full=GEM-like protein 5;	SubName: Full=ABA-responsive protein {ECO:0000313|EMBL:AQK39761.1};	--	GO:0009793,embryo development ending in seed dormancy; GO:0098755,maintenance of seed dormancy by absisic acid; GO:0010029,regulation of seed germination; GO:0009845,seed germination	PF02893.20:GRAM domain
gene-LOC100285726	NC_050099.1	163118304	163122988	-	1.68	3.7	3.61	12.35	6.33	12.51	1.686	0.000270235	0.011767	up	--	oligopeptide transporter 4 [Zea mays]	RecName: Full=Oligopeptide transporter 4; Short=AtOPT4;	SubName: Full=Oligopeptide transporter 4 {ECO:0000313|EMBL:AQK54444.1};	Sexual differentiation process protein ISP4	GO:0005887,integral component of plasma membrane; GO:0016020,membrane; GO:0035673,oligopeptide transmembrane transporter activity; GO:0015031,protein transport; GO:0080167,response to karrikin	PF03169.15:OPT oligopeptide transporter protein
gene-LOC100285776	NC_050096.1	144450291	144452122	+	0.22	0.57	0.3	4.32	3.06	8.83	3.834	3.82388e-08	6.96182e-06	up	K05278 flavonol synthase [EC:1.14.11.23] | (RefSeq) flavonol synthase/flavanone 3-hydroxylase-like (A)	leucoanthocyanidin dioxygenase [Zea mays]	RecName: Full=Protein SRG1; Short=AtSRG1; AltName: Full=Protein SENESCENCE-RELATED GENE 1;	SubName: Full=2-oxoglutarate (2OG) and Fe(II)-dependent oxygenase superfamily protein {ECO:0000313|EMBL:ONM01084.1}; SubName: Full=Leucoanthocyanidin dioxygenase {ECO:0000313|EMBL:ACG46043.1};	Iron/ascorbate family oxidoreductases	GO:0046872,metal ion binding; GO:0016682,oxidoreductase activity, acting on diphenols and related substances as donors, oxygen as acceptor; GO:0010150,leaf senescence	PF03171.20:2OG-Fe(II) oxygenase superfamily
gene-LOC100285777	NC_050105.1	56103962	56106963	+	1.2	1.19	0.65	3.2	3.49	5.01	1.746	0.000939253	0.0302427	up	K15015 solute carrier family 32 (vesicular inhibitory amino acid transporter) | (RefSeq) vacuolar amino acid transporter 1 (A)	LHT1 isoform X1 [Zea mays]	RecName: Full=Lysine histidine transporter 1;	SubName: Full=LHT1 {ECO:0000313|EMBL:AQK40788.1};	Amino acid transporters	GO:0016021,integral component of membrane; GO:0005886,plasma membrane; GO:0015171,amino acid transmembrane transporter activity; GO:0015293,symporter activity; GO:0043090,amino acid import; GO:0080167,response to karrikin	PF01490.18:Transmembrane amino acid transporter protein
gene-LOC100285801	NC_050103.1	158698068	158699379	-	7.18	11.95	13.99	29.05	28.27	32.01	1.282	2.96446e-05	0.00197368	up	K01489 cytidine deaminase [EC:3.5.4.5] | (RefSeq) CDA1 (A)	Cytidine deaminase 1 [Zea mays]	RecName: Full=Cytidine deaminase 1; Short=At-CDA1; EC=3.5.4.5;	SubName: Full=Cytidine deaminase 1 {ECO:0000313|EMBL:AQK97812.1};	Cytidine deaminase	GO:0005829,cytosol; GO:0004126,cytidine deaminase activity; GO:0047844,deoxycytidine deaminase activity; GO:0042803,protein homodimerization activity; GO:0008270,zinc ion binding; GO:0006216,cytidine catabolic process; GO:0009972,cytidine deamination	PF08211.12:Cytidine and deoxycytidylate deaminase zinc-binding region
gene-LOC100285822	NC_050104.1	161970062	161971520	+	20.06	22.82	22.98	13.55	12.5	8.99	-1.152	4.02321e-08	7.23541e-06	down	K05359 arogenate/prephenate dehydratase [EC:4.2.1.91 4.2.1.51] | (RefSeq) P-protein (A)	P-protein [Zea mays]	RecName: Full=Arogenate dehydratase 3, chloroplastic; Short=AtADT3; EC=4.2.1.91; AltName: Full=Prephenate dehydratase 1; Short=AtPDT1; Flags: Precursor;	SubName: Full=p-protein {ECO:0000313|EMBL:AQL10343.1};	Prephenate dehydratase	GO:0009507,chloroplast; GO:0009570,chloroplast stroma; GO:0005829,cytosol; GO:0047769,arogenate dehydratase activity; GO:0009094,L-phenylalanine biosynthetic process; GO:0080167,response to karrikin; GO:0010244,response to low fluence blue light stimulus by blue low-fluence system; GO:0006571,tyrosine biosynthetic process	PF00800.18:Prephenate dehydratase
gene-LOC100285922	NC_050096.1	108823395	108826422	+	36.69	83.23	113.67	48.85	40.91	27.85	-1.162	0.00143679	0.0413835	down	K23872 putative homogalacturonan methyltransferase [EC:2.1.1.-] | (RefSeq) probable methyltransferase PMT13 (A)	ankyrin protein kinase-like isoform X1 [Zea mays]	RecName: Full=Probable methyltransferase PMT21; EC=2.1.1.-; AltName: Full=Protein EARLY-RESPONSIVE TO DEHYDRATION 3;	SubName: Full=Uncharacterized protein {ECO:0000313|EMBL:ACN28641.1};	--	GO:0005789,endoplasmic reticulum membrane; GO:0005768,endosome; GO:0005794,Golgi apparatus; GO:0016021,integral component of membrane; GO:0005802,trans-Golgi network; GO:0008757,S-adenosylmethionine-dependent methyltransferase activity; GO:0032259,methylation	PF03141.16:Putative S-adenosyl-L-methionine-dependent methyltransferase
gene-LOC100285963	NC_050103.1	24573314	24575605	-	30.98	25.11	24.84	16.87	16.51	14.18	-1.031	0.00173022	0.0469469	down	K03549 KUP system potassium uptake protein | (RefSeq) potassium transporter 5-like (A)	peptide-N4-asparagine amidase A precursor [Zea mays]	RecName: Full=Peptide-N4-(N-acetyl-beta-glucosaminyl)asparagine amidase A; Short=PNGase A; EC=3.5.1.52; AltName: Full=Glycopeptide N-glycosidase; AltName: Full=N-glycanase; Contains: RecName: Full=Peptide-N4-(N-acetyl-beta-glucosaminyl)asparagine amidase A light chain; AltName: Full=PNGase A small chain; AltName: Full=PNGase A subunit B; Contains: RecName: Full=Peptide-N4-(N-acetyl-beta-glucosami…	SubName: Full=Peptide-N4-(N-acetyl-beta-glucosaminyl)asparagine amidase A protein {ECO:0000313|EMBL:AQK90990.1}; SubName: Full=Peptide-N4-asparagine amidase A {ECO:0000313|EMBL:ACG47025.1};	--	GO:0000224,peptide-N4-(N-acetyl-beta-glucosaminyl)asparagine amidase activity	PF12222.8:Peptide N-acetyl-beta-D-glucosaminyl asparaginase amidase A
gene-LOC100285965	NC_050097.1	215623591	215624954	+	0.28	0.14	0.24	0.73	1.36	2.42	2.617	0.00105998	0.0329732	up	K21994 LOB domain-containing protein 18 | (RefSeq) LOB domain-containing protein 33 (A)	LOB transcription factor, partial [Zea mays]	RecName: Full=LOB domain-containing protein 37; AltName: Full=ASYMMETRIC LEAVES 2-like protein 39; Short=AS2-like protein 39;	SubName: Full=Seed specific protein Bn15D17A {ECO:0000313|EMBL:ONM24902.1};	--	GO:0006807,nitrogen compound metabolic process; GO:0060776,simple leaf morphogenesis	PF03195.14:Lateral organ boundaries (LOB) domain
gene-LOC100285970	NC_050101.1	149715847	149717142	-	0.09	0.04	0.11	6.49	5.27	9.92	6.361	1.19369e-15	1.40827e-12	up	K19041 E3 ubiquitin-protein ligase RNF38/44 [EC:2.3.2.27] | (RefSeq) RING-H2 finger protein ATL65-like (A)	zinc finger, C3HC4 type family protein [Zea mays]	RecName: Full=RING-H2 finger protein ATL11; EC=2.3.2.27 {ECO:0000305}; AltName: Full=RING-type E3 ubiquitin transferase ATL11 {ECO:0000305}; Flags: Precursor;	SubName: Full=Putative RING zinc finger domain superfamily protein {ECO:0000313|EMBL:AQK85269.1};	FOG: Predicted E3 ubiquitin ligase	GO:0016021,integral component of membrane; GO:0046872,metal ion binding; GO:0061630,ubiquitin protein ligase activity; GO:0043161,proteasome-mediated ubiquitin-dependent protein catabolic process	PF13639.6:Ring finger domain
gene-LOC100286044	NC_050098.1	20587828	20588577	+	0.66	0.52	0.32	4.21	2.88	7.6	3.144	1.23346e-05	0.000957363	up	K13993 HSP20 family protein | (RefSeq) 16.9 kDa class I heat shock protein 1 (A)	16.9 kDa class I heat shock protein 1 [Zea mays]	RecName: Full=16.9 kDa class I heat shock protein 1; AltName: Full=16.9 kDa heat shock protein 1; Short=OsHsp16.9A;	SubName: Full=16.9 kDa class I heat shock protein 1 {ECO:0000313|EMBL:ACG47427.1}; SubName: Full=17.4 kDa class I heat shock protein {ECO:0000313|EMBL:ONM30198.1};	Molecular chaperone (small heat-shock protein Hsp26/Hsp42)	GO:0005737,cytoplasm; GO:0051259,protein complex oligomerization; GO:0009408,response to heat	PF00011.21:Hsp20/alpha crystallin family
gene-LOC100286138	NC_050104.1	125079530	125081420	+	2.71	1.98	2.03	0.75	0.72	1.1	-1.606	0.00133526	0.0391084	down	K15397 3-ketoacyl-CoA synthase [EC:2.3.1.199] | (RefSeq) acyltransferase precursor (A)	acyltransferase precursor [Zea mays]	RecName: Full=3-ketoacyl-CoA synthase 12 {ECO:0000303|PubMed:18465198}; Short=KCS-12 {ECO:0000303|PubMed:18465198}; EC=2.3.1.199 {ECO:0000305}; AltName: Full=Very long-chain fatty acid condensing enzyme 12 {ECO:0000303|PubMed:18465198}; Short=VLCFA condensing enzyme 12 {ECO:0000303|PubMed:18465198}; Flags: Precursor;	RecName: Full=3-ketoacyl-CoA synthase {ECO:0000256|PIRNR:PIRNR036417}; EC=2.3.1.- {ECO:0000256|PIRNR:PIRNR036417};	--	GO:0005783,endoplasmic reticulum; GO:0016020,membrane; GO:0102336,3-oxo-arachidoyl-CoA synthase activity; GO:0102337,3-oxo-cerotoyl-CoA synthase activity; GO:0102338,3-oxo-lignoceronyl-CoA synthase activity; GO:0102756,very-long-chain 3-ketoacyl-CoA synthase activity; GO:0006633,fatty acid biosynthetic process	PF08392.12:FAE1/Type III polyketide synthase-like protein
gene-LOC100286158	NC_050096.1	231425039	231426960	-	10.48	10.29	12.12	44.13	54.12	46.33	1.915	1.44841e-12	7.49462e-10	up	K19861 benzyl alcohol O-benzoyltransferase [EC:2.3.1.196 2.3.1.232] | (RefSeq) 10-deacetylbaccatin III 10-O-acetyltransferase (A)	hydroxycinnamoyltransferase13 [Zea mays]	RecName: Full=Benzyl alcohol O-benzoyltransferase; EC=2.3.1.196; AltName: Full=Benzoyl coenzyme A:benzyl alcohol benzoyl transferase;	SubName: Full=Hydroxycinnamoyltransferase13 {ECO:0000313|EMBL:ONM05273.1};	--	GO:0016747,transferase activity, transferring acyl groups other than amino-acyl groups	PF02458.15:Transferase family
gene-LOC100286180	NC_050098.1	145835091	145836943	-	5.64	4.12	3.2	1.63	1.19	0.85	-2.135	6.15778e-06	0.000547041	down	K19044 E3 ubiquitin-protein ligase XBAT32/33 [EC:2.3.2.27] | (RefSeq) E3 ubiquitin-protein ligase XB3 (A)	Ring zinc finger protein [Zea mays]	RecName: Full=E3 ubiquitin-protein ligase XB3; EC=2.3.2.27; AltName: Full=Ankyrin repeat domain and RING finger-containing protein XB3; AltName: Full=RING-type E3 ubiquitin transferase XB3; AltName: Full=XA21-binding protein 3;	SubName: Full=Ring zinc finger protein {ECO:0000313|EMBL:ONM34147.1};	--	GO:0046872,metal ion binding; GO:0004842,ubiquitin-protein transferase activity; GO:0042742,defense response to bacterium; GO:0051865,protein autoubiquitination	PF12796.7:Ankyrin repeats (3 copies)
gene-LOC100286212	NC_050100.1	38383488	38384257	+	5.01	13.26	7	0.79	1.5	2.29	-2.559	1.4607e-05	0.00110466	down	K13464 jasmonate ZIM domain-containing protein | (RefSeq) ZIM10; ZIM motif family protein (A)	ZIM motif family protein [Zea mays]	RecName: Full=Protein TIFY 11e {ECO:0000305}; Short=OsTIFY11e {ECO:0000303|PubMed:19618278}; AltName: Full=Jasmonate ZIM domain-containing protein 13 {ECO:0000305}; Short=OsJAZ13 {ECO:0000303|PubMed:19618278};	SubName: Full=TIFY20 {ECO:0000313|EMBL:AND66104.1}; SubName: Full=ZIM motif family protein {ECO:0000313|EMBL:ACG48285.1};	--	GO:0005634,nucleus; GO:0003714,transcription corepressor activity; GO:1903507,negative regulation of nucleic acid-templated transcription; GO:0031347,regulation of defense response; GO:2000022,regulation of jasmonic acid mediated signaling pathway; GO:0006355,regulation of transcription, DNA-templated; GO:0009611,response to wounding; GO:0006351,transcription, DNA-templated	PF09425.10:Divergent CCT motif
gene-LOC100286242	NC_050097.1	2223206	2224018	+	2.19	3.12	4.32	2.03	1.41	1.15	-1.282	0.00178927	0.0479953	down	K03860 phosphatidylinositol glycan, class Q | (RefSeq) N-acetylglucosaminyl-phosphatidylinositol biosynthetic protein gpi1-like (A)	Gibberellin-regulated protein 2 [Zea mays]	RecName: Full=Snakin-2; Flags: Precursor;	SubName: Full=Gibberellin-regulated protein 2 {ECO:0000313|EMBL:ONM12191.1};	--	GO:0005618,cell wall; GO:0005576,extracellular region; GO:0006952,defense response	PF02704.14:Gibberellin regulated protein
gene-LOC100286265	NC_050097.1	151042368	151043198	-	3.18	6.51	5.18	31.08	41.79	47.17	2.877	9.93847e-14	6.66194e-11	up	K13448 calcium-binding protein CML | (RefSeq) umc2252; uncharacterized protein LOC100286265 isoform 1 (A)	uncharacterized protein LOC100286265 isoform 2 [Zea mays]	RecName: Full=Probable calcium-binding protein CML36; AltName: Full=Calmodulin-like protein 36;	SubName: Full=Calmodulin-like protein 1 {ECO:0000313|EMBL:ACG35980.1}; SubName: Full=Putative calcium-binding protein CML36 {ECO:0000313|EMBL:ONM19866.1};	Calmodulin and related proteins (EF-Hand superfamily)	GO:0005886,plasma membrane; GO:0005509,calcium ion binding; GO:0050832,defense response to fungus	PF00036.32:EF hand
gene-LOC100286314	NC_050100.1	55377738	55379861	-	3.74	7.56	7.12	33.98	38.58	53.97	2.669	1.11958e-10	3.71021e-08	up	K05658 ATP-binding cassette, subfamily B (MDR/TAP), member 1 [EC:3.6.3.44] | (RefSeq) ABC transporter B family member 2-like (A)	phosphate import ATP-binding protein pstB 1 [Zea mays]	RecName: Full=Protein STAR1; AltName: Full=ABC transporter ABCI.12; Short=OsABCI12; AltName: Full=ABC transporter I family member 12; AltName: Full=Protein ALUMINUM SENSITIVE 1; AltName: Full=Protein SENSITIVE TO ALUMINUM RHIZOTOXICITY 1;	SubName: Full=Phosphate import ATP-binding protein pstB 1 {ECO:0000313|EMBL:ACG48860.1};	Multidrug/pheromone exporter, ABC superfamily	GO:0012506,vesicle membrane; GO:0005524,ATP binding; GO:0016887,ATPase activity; GO:0005315,inorganic phosphate transmembrane transporter activity; GO:0005460,UDP-glucose transmembrane transporter activity; GO:0035435,phosphate ion transmembrane transport; GO:0010044,response to aluminum ion; GO:0015786,UDP-glucose transmembrane transport	PF00005.27:ABC transporter
gene-LOC100286345	NC_050102.1	167997259	167997850	+	2.25	1.8	1.42	4.71	9.94	7.36	1.765	0.000833009	0.0280786	up	--	low-molecular-weight cysteine-rich protein LCR70 precursor [Zea mays]	RecName: Full=Defensin J1-2; Flags: Precursor;	SubName: Full=Low-molecular-weight cysteine-rich protein LCR70 {ECO:0000313|EMBL:ACG26208.1, ECO:0000313|EnsemblPlants:Zm00001d021843_P001};	--	GO:0005576,extracellular region; GO:0050832,defense response to fungus; GO:0031640,killing of cells of other organism	PF00304.20:Gamma-thionin family
gene-LOC100286361	NC_050104.1	155488275	155489165	-	0.37	0	0.16	2.12	2.26	6.87	4.211	6.87689e-05	0.00393839	up	--	AIR12 [Zea mays]	RecName: Full=Cytochrome b561 and DOMON domain-containing protein At5g48750; AltName: Full=Protein b561A.tha17; Flags: Precursor;	SubName: Full=AIR12 {ECO:0000313|EMBL:AQL09091.1};	Predicted membrane protein, contains DoH and Cytochrome b-561/ferric reductase transmembrane domains	GO:0016021,integral component of membrane; GO:0055114,oxidation-reduction process	PF04526.13:Protein of unknown function (DUF568)
gene-LOC100286852	NC_050096.1	212159014	212161269	+	0.99	1.03	0.74	4.73	7.41	1.83	2.012	7.24811e-05	0.00413483	up	K20619 cytochrome P450 family 78 subfamily A | (RefSeq) cytochrome P450 78A9-like (A)	cytochrome P450 CYP78A53 [Zea mays]	RecName: Full=Cytochrome P450 78A9; EC=1.14.-.-;	SubName: Full=Cytochrome P450 CYP78A53 {ECO:0000313|EMBL:ACG29777.1};	Cytochrome P450 CYP2 subfamily	GO:0016021,integral component of membrane; GO:0016020,membrane; GO:0020037,heme binding; GO:0005506,iron ion binding; GO:0016709,oxidoreductase activity, acting on paired donors, with incorporation or reduction of molecular oxygen, NAD(P)H as one donor, and incorporation of one atom of oxygen; GO:0010154,fruit development; GO:0040008,regulation of growth; GO:0044550,secondary metabolite biosynthe…	PF00067.22:Cytochrome P450
gene-LOC100303866	NC_050097.1	5627119	5627762	+	25.25	32.82	40.02	93.91	115.26	72.46	1.3	2.39789e-11	9.68814e-09	up	--	uncharacterized LOC100303866 [Zea mays]	--	SubName: Full=DNA topoisomerase 2 {ECO:0000313|EMBL:ONM12934.1};	--	GO:0016853,isomerase activity	--
gene-LOC100304064	NC_050096.1	214050898	214051698	-	3.72	6.48	9.15	1.72	2.82	1.17	-1.973	1.74375e-06	0.000180457	down	K07441 beta-1,4-N-acetylglucosaminyltransferase [EC:2.4.1.141] | (RefSeq) UDP-N-acetylglucosamine transferase subunit ALG14 homolog (A)	SAUR33 - auxin-responsive SAUR family member [Zea mays]	RecName: Full=Auxin-responsive protein SAUR72 {ECO:0000305}; AltName: Full=Protein SMALL AUXIN UP RNA 72 {ECO:0000303|PubMed:12036261};	SubName: Full=SAUR33-auxin-responsive SAUR family member {ECO:0000313|EMBL:ONM04363.1};	--	GO:0005737,cytoplasm; GO:0009734,auxin-activated signaling pathway; GO:0007275,multicellular organism development; GO:0040008,regulation of growth	PF02519.14:Auxin responsive protein
gene-LOC100304274	NC_050105.1	83905973	83906772	-	0	0.07	0	2.04	0.69	2.27	6.001	2.92147e-05	0.00196277	up	--	uncharacterized protein LOC100304274 precursor [Zea mays]	--	SubName: Full=Retrotransposon protein {ECO:0000313|EnsemblPlants:Zm00001d024648_P001};	--	--	PF04043.15:Plant invertase/pectin methylesterase inhibitor
gene-LOC100304432	NC_050098.1	209919800	209923939	+	4.25	3.5	2.92	0.99	1.06	1.18	-1.966	7.93709e-06	0.000663163	down	K14664 IAA-amino acid hydrolase [EC:3.5.1.-] | (RefSeq) uncharacterized protein LOC100304432 precursor (A)	uncharacterized protein LOC100304432 precursor [Zea mays]	RecName: Full=IAA-amino acid hydrolase ILR1-like 2; EC=3.5.1.-; Flags: Precursor;	SubName: Full=IAA-amino acid hydrolase ILR1-like 4 {ECO:0000313|EMBL:ONM38861.1};	--	GO:0005788,endoplasmic reticulum lumen; GO:0016787,hydrolase activity; GO:0008152,metabolic process	PF01546.28:Peptidase family M20/M25/M40
gene-LOC100381403	NC_050101.1	25231403	25237707	+	1.01	1.48	1.53	3.48	4.03	3.69	1.291	2.19518e-05	0.00154522	up	K18045 tyrosine-protein phosphatase SIW14 [EC:3.1.3.48] | (RefSeq) uncharacterized LOC101755591 (A)	uncharacterized LOC100381403 [Zea mays]	RecName: Full=Probable transcription factor At4g00610 {ECO:0000305}; AltName: Full=Storekeeper-like protein At4g00610 {ECO:0000305};	SubName: Full=Uncharacterized protein {ECO:0000313|EMBL:ACN25877.1};	--	GO:0006355,regulation of transcription, DNA-templated; GO:0006351,transcription, DNA-templated	PF04504.14:Protein of unknown function, DUF573
gene-LOC100381473	NC_050100.1	10185438	10187396	+	0.65	0.28	0.36	3.09	2.33	4.54	2.74	2.94883e-05	0.00196771	up	K06287 septum formation protein | (RefSeq) maf-like protein DDB_G0281937 isoform X1 (A)	uncharacterized protein LOC100381473 isoform X3 [Zea mays]	RecName: Full=Unknown protein 3; Flags: Fragment;	SubName: Full=Maf-like protein {ECO:0000313|EMBL:AQK63255.1};	Predicted nucleic acid-binding protein ASMTL	--	PF02545.14:Maf-like protein
gene-LOC100381480	NC_050099.1	176197620	176198572	-	0.82	2.04	2.86	0.64	0.52	0.41	-2.033	0.000324841	0.0134374	down	--	uncharacterized protein LOC100381480 [Zea mays]	--	SubName: Full=Uncharacterized protein {ECO:0000313|EMBL:ACN26061.1};	--	--	--
gene-LOC100381643	NC_050096.1	229972006	229975025	-	21.63	80.26	71.89	31.29	18.09	9.72	-1.743	0.000740565	0.0256665	down	K10355 actin, other eukaryote | (RefSeq) putative actin family protein (A)	putative actin family protein [Zea mays]	RecName: Full=Actin-2;	SubName: Full=Actin-7 {ECO:0000313|EMBL:ONM05198.1};	Actin and related proteins	GO:0005737,cytoplasm; GO:0005856,cytoskeleton; GO:0005524,ATP binding	PF00022.19:Actin
gene-LOC100381655	NC_050104.1	150523918	150526258	-	0.55	0.93	0.66	2.43	2.42	2.96	1.71	3.10776e-05	0.00204143	up	K01580 glutamate decarboxylase [EC:4.1.1.15] | (RefSeq) uncharacterized protein LOC100381655 (A)	uncharacterized protein LOC100381655 [Zea mays]	RecName: Full=Glutamate decarboxylase 1; Short=GAD 1; EC=4.1.1.15;	RecName: Full=Glutamate decarboxylase {ECO:0000256|RuleBase:RU361171}; EC=4.1.1.15 {ECO:0000256|RuleBase:RU361171};	Glutamate decarboxylase/sphingosine phosphate lyase	GO:0005829,cytosol; GO:0005516,calmodulin binding; GO:0004351,glutamate decarboxylase activity; GO:0030170,pyridoxal phosphate binding; GO:0006536,glutamate metabolic process; GO:0046686,response to cadmium ion	PF00282.19:Pyridoxal-dependent decarboxylase conserved domain
gene-LOC100381666	NC_050103.1	73966471	73968831	-	0.81	1.71	1.59	3.27	3.76	2.53	1.02	0.00102476	0.0322324	up	K14497 protein phosphatase 2C [EC:3.1.3.16] | (RefSeq) PP2C12; putative protein phosphatase 2C family protein (A)	putative protein phosphatase 2C family protein [Zea mays]	RecName: Full=Probable protein phosphatase 2C 8; Short=OsPP2C08; EC=3.1.3.16;	SubName: Full=2C-type protein phosphatase protein {ECO:0000313|EMBL:AIG52097.1}; SubName: Full=Protein phosphatase homolog9 {ECO:0000313|EMBL:AQK92314.1};	Serine/threonine protein phosphatase	GO:0046872,metal ion binding; GO:0004722,protein serine/threonine phosphatase activity	PF00481.21:Protein phosphatase 2C
gene-LOC100381673	NC_050098.1	184696834	184702188	-	1.66	2.57	2.08	6.35	5.83	8.57	1.571	5.34675e-05	0.0032183	up	K00002 alcohol dehydrogenase (NADP+) [EC:1.1.1.2] | (RefSeq) TIDP2673; uncharacterized protein LOC100381673 (A)	uncharacterized protein LOC100381673 [Zea mays]	RecName: Full=Aldo-keto reductase family 4 member C10; EC=1.1.1.-;	SubName: Full=Aldo-keto reductase family 4 member C9 {ECO:0000313|EMBL:ONM36426.1};	Aldo/keto reductase family proteins	GO:0005829,cytosol; GO:0005634,nucleus; GO:0016491,oxidoreductase activity	PF00248.21:Aldo/keto reductase family
gene-LOC100381739	NC_050100.1	194859798	194860933	+	1.94	1.91	2	4.98	5.62	8.9	1.576	0.0010424	0.032601	up	--	uncharacterized protein LOC100381739 precursor [Zea mays]	--	SubName: Full=Uncharacterized protein {ECO:0000313|EMBL:ACN26837.1, ECO:0000313|EnsemblPlants:Zm00001d017438_P001};	--	--	--
gene-LOC100381832	NC_050105.1	102894135	102901581	-	0.53	0.64	0.35	2.1	1.74	3.04	2.008	7.70603e-05	0.00432094	up	K05665 ATP-binding cassette, subfamily C (CFTR/MRP), member 1 | (RefSeq) ABC transporter C family member 4 isoform X1 (A)	ABC transporter C family member 4 [Zea mays]	RecName: Full=ABC transporter C family member 4; Short=ABC transporter ABCC.4; Short=AtABCC4; EC=3.6.3.44; AltName: Full=ATP-energized glutathione S-conjugate pump 4; AltName: Full=Glutathione S-conjugate-transporting ATPase 4; AltName: Full=Multidrug resistance-associated protein 4;	SubName: Full=ABC transporter C family member 4 {ECO:0000313|EMBL:AQK42820.1};	Multidrug resistance-associated protein/mitoxantrone resistance protein, ABC superfamily	GO:0005794,Golgi apparatus; GO:0016021,integral component of membrane; GO:0000325,plant-type vacuole; GO:0005886,plasma membrane; GO:0009506,plasmodesma; GO:0005774,vacuolar membrane; GO:0005773,vacuole; GO:0005524,ATP binding; GO:0042626,ATPase activity, coupled to transmembrane movement of substances; GO:0008559,xenobiotic transmembrane transporting ATPase activity; GO:0006855,drug transmembran…	PF00664.23:ABC transporter transmembrane region
gene-LOC100381968	NC_050096.1	5563817	5568294	-	55.25	56.73	42.36	147.23	182.59	264.31	1.762	0.000130085	0.00660367	up	K07198 5'-AMP-activated protein kinase, catalytic alpha subunit [EC:2.7.11.11] | (RefSeq) CBL-interacting serine/threonine-protein kinase 20 (A)	putative CBL-interacting protein kinase family protein [Zea mays]	RecName: Full=CBL-interacting protein kinase 9; EC=2.7.11.1; AltName: Full=OsCIPK09;	RecName: Full=Non-specific serine/threonine protein kinase {ECO:0000256|SAAS:SAAS00351747}; EC=2.7.11.1 {ECO:0000256|SAAS:SAAS00351747};	Serine/threonine protein kinase	GO:0005622,intracellular; GO:0005524,ATP binding; GO:0004674,protein serine/threonine kinase activity; GO:0035556,intracellular signal transduction; GO:0018105,peptidyl-serine phosphorylation; GO:0018107,peptidyl-threonine phosphorylation	PF00069.25:Protein kinase domain
gene-LOC100381976	NC_050099.1	192253655	192255332	-	1.43	2.56	3.16	8.13	10.03	10.07	1.826	3.02618e-07	4.07554e-05	up	K15634 probable phosphoglycerate mutase [EC:5.4.2.12] | (RefSeq) phosphoglycerate mutase-like protein 4 (A)	uncharacterized protein LOC100381976 [Zea mays]	RecName: Full=Phosphoglycerate mutase-like protein 4 {ECO:0000305};	SubName: Full=Pentatricopeptide repeat-containing protein {ECO:0000313|EMBL:AQK57263.1};	Phosphoglycerate mutase	GO:0005829,cytosol; GO:0016791,phosphatase activity	PF00300.22:Histidine phosphatase superfamily (branch 1)
gene-LOC100381992	NC_050104.1	20692154	20695662	-	0.81	1.68	1.5	4.02	3.42	3.37	1.265	2.97668e-05	0.00197735	up	K01805 xylose isomerase [EC:5.3.1.5] | (RefSeq) xylose isomerase (A)	hydrolase-like protein family isoform X2 [Zea mays]	--	SubName: Full=Hydrolase-like protein family {ECO:0000313|EMBL:AQL02010.1};	Predicted alpha/beta hydrolase	GO:0016787,hydrolase activity	PF05057.14:Putative serine esterase (DUF676)
gene-LOC100382002	NC_050102.1	127365742	127369215	+	0.38	0.28	0.6	3.23	3.45	5.77	3.164	5.95506e-09	1.29146e-06	up	K18171 COX assembly mitochondrial protein 1 | (RefSeq) protein GAMETE EXPRESSED 1 (A)	Protein GAMETE EXPRESSED 1 [Zea mays]	RecName: Full=Protein GAMETE EXPRESSED 1; Flags: Precursor;	SubName: Full=Protein GAMETE EXPRESSED 1 {ECO:0000313|EMBL:ONM55307.1};	--	GO:0005887,integral component of plasma membrane; GO:0005886,plasma membrane; GO:0042802,identical protein binding; GO:0009793,embryo development ending in seed dormancy; GO:0009553,embryo sac development; GO:0009555,pollen development	--
gene-LOC100382019	NC_050103.1	137182943	137184220	+	0.91	1	0.7	12.2	23.08	3.21	3.524	4.14727e-08	7.36865e-06	up	K16818 phospholipase A1 [EC:3.1.1.32] | (RefSeq) phospholipase A(1) DAD1, chloroplastic-like (A)	uncharacterized protein LOC100382019 [Zea mays]	RecName: Full=Phospholipase A1-II 4; EC=3.1.1.-;	SubName: Full=Phospholipase A1-IIgamma {ECO:0000313|EMBL:AQK95503.1};	Predicted lipase	GO:0005737,cytoplasm; GO:0008970,phospholipase A1 activity; GO:0016042,lipid catabolic process	PF01764.25:Lipase (class 3)
gene-LOC100382036	NC_050102.1	150377533	150389318	+	5.83	7.4	7.62	18.14	20.01	14.17	1.103	1.42001e-10	4.53766e-08	up	K04424 sterile alpha motif and leucine zipper containing kinase AZK [EC:2.7.11.25] | (RefSeq) serine/threonine-protein kinase EDR1 isoform X1 (A)	uncharacterized protein LOC100382036 isoform X2 [Zea mays]	RecName: Full=Serine/threonine-protein kinase STY17 {ECO:0000305}; EC=2.7.11.1 {ECO:0000269|PubMed:17090544}; AltName: Full=Serine/threonine/tyrosine-protein kinase 17 {ECO:0000303|PubMed:16429265};	SubName: Full=Uncharacterized protein {ECO:0000313|EMBL:ACN28371.1};	Tyrosine kinase specific for activated (GTP-bound) p21cdc42Hs	GO:0005829,cytosol; GO:0005524,ATP binding; GO:0004674,protein serine/threonine kinase activity; GO:0004712,protein serine/threonine/tyrosine kinase activity; GO:0004871,NA; GO:0009658,chloroplast organization; GO:0035556,intracellular signal transduction	PF07714.17:Protein tyrosine kinase
gene-LOC100382111	NC_050096.1	303643809	303646439	-	7.12	6.71	3.01	24.75	16.66	39.49	2.074	0.000806432	0.027497	up	--	uncharacterized protein LOC100382111 [Zea mays]	--	SubName: Full=Uncharacterized protein {ECO:0000313|EMBL:ACN27883.1};	--	--	--
gene-LOC100382120	NC_050099.1	55570224	55574550	-	11.23	11.33	10.41	25.64	28.17	39.76	1.324	0.00134049	0.0391837	up	K08232 monodehydroascorbate reductase (NADH) [EC:1.6.5.4] | (RefSeq) gpm592; uncharacterized protein LOC100382120 (A)	uncharacterized protein LOC100382120 [Zea mays]	RecName: Full=Monodehydroascorbate reductase 4, cytosolic {ECO:0000305}; Short=OsMADR4 {ECO:0000303|PubMed:25546583}; Short=OsMDHAR4 {ECO:0000303|PubMed:25546583}; EC=1.6.5.4 {ECO:0000250|UniProtKB:Q652L6};	SubName: Full=Monodehydroascorbate reductase 1 peroxisomal {ECO:0000313|EMBL:AQK51662.1};	Monodehydroascorbate/ferredoxin reductase	GO:0005737,cytoplasm; GO:0050660,flavin adenine dinucleotide binding; GO:0016656,monodehydroascorbate reductase (NADH) activity	PF07992.14:Pyridine nucleotide-disulphide oxidoreductase
gene-LOC100382142	NC_050101.1	131290923	131293198	+	0.24	0.22	0.27	2.82	2.21	5.97	3.797	5.53543e-09	1.20935e-06	up	K01176 alpha-amylase [EC:3.2.1.1] | (RefSeq) lectin-domain containing receptor kinase VI.3-like (A)	Putative lectin-like receptor protein kinase family protein [Zea mays]	RecName: Full=L-type lectin-domain containing receptor kinase IV.2 {ECO:0000303|PubMed:19773388}; Short=Arabidopsis thaliana lectin-receptor kinase a4 {ECO:0000303|PubMed:19773388}; Short=AthlecRK-a4 {ECO:0000303|Ref.6}; Short=LecRK-IV.2 {ECO:0000303|PubMed:19773388}; EC=2.7.11.1 {ECO:0000255|PROSITE-ProRule:PRU00159}; AltName: Full=Protein SMALL, GLUED-TOGETHER, AND COLLAPSED POLLEN {ECO:0000303…	SubName: Full=Putative lectin-like receptor protein kinase family protein {ECO:0000313|EMBL:AQK83892.1};	--	GO:0016021,integral component of membrane; GO:0005886,plasma membrane; GO:0005524,ATP binding; GO:0030246,carbohydrate binding; GO:0004674,protein serine/threonine kinase activity; GO:0042742,defense response to bacterium; GO:0009555,pollen development	PF00139.19:Legume lectin domain
gene-LOC100382148	NC_050098.1	29036713	29042359	+	1.02	1.44	2.02	9.82	16.59	13.94	3.001	1.42564e-16	2.10239e-13	up	K14514 ethylene-insensitive protein 3 | (RefSeq) hypothetical protein (A)	uncharacterized protein LOC100382148 isoform X1 [Zea mays]	RecName: Full=Phosphate transporter PHO1-1; AltName: Full=Protein PHO1-1; Short=OsPHO1;1;	SubName: Full=Phosphate transporter1 {ECO:0000313|EMBL:ONM30611.1};	Predicted small molecule transporter	GO:0016021,integral component of membrane; GO:0005886,plasma membrane; GO:0005802,trans-Golgi network; GO:0006817,phosphate ion transport	PF03124.14:EXS family
gene-LOC100382154	NC_050102.1	171021610	171022263	-	0.17	0.09	0.14	2.57	0.38	1.74	3.368	0.00180405	0.0482065	up	--	uncharacterized protein LOC100382154 [Zea mays]	--	SubName: Full=Uncharacterized protein {ECO:0000313|EMBL:ACN28042.1, ECO:0000313|EnsemblPlants:Zm00001d021977_P001};	--	--	--
gene-LOC100382179	NC_050104.1	45191636	45194086	+	0.15	0.23	0.29	7.38	2.87	6.31	4.485	7.54257e-13	4.27809e-10	up	K22683 aspartyl protease family protein [EC:3.4.23.-] | (RefSeq) aspartyl protease family protein 2-like (A)	uncharacterized protein LOC100382179 precursor [Zea mays]	RecName: Full=Aspartyl protease family protein At5g10770; EC=3.4.23.- {ECO:0000305}; Flags: Precursor;	SubName: Full=Aspartyl protease AED1 {ECO:0000313|EMBL:AQL03302.1};	Aspartyl protease	GO:0031225,anchored component of membrane; GO:0005886,plasma membrane; GO:0004190,aspartic-type endopeptidase activity; GO:0030163,protein catabolic process; GO:0006508,proteolysis	PF14543.6:Xylanase inhibitor N-terminal
gene-LOC100382192	NC_050101.1	45031566	45033718	+	0.18	0.31	0.35	1.33	0.82	2.46	2.375	0.000376543	0.0151305	up	K20044 phosphatidylinositol-binding clathrin assembly protein | (RefSeq) putative clathrin assembly protein At5g57200 (A)	putative ENTH/ANTH/VHS superfamily protein [Zea mays]	RecName: Full=Probable clathrin assembly protein At4g32285;	SubName: Full=Putative clathrin assembly protein {ECO:0000313|EMBL:AQK79396.1};	Clathrin assembly protein AP180 and related proteins, contain ENTH domain	GO:0005905,clathrin-coated pit; GO:0030136,clathrin-coated vesicle; GO:0005829,cytosol; GO:0005794,Golgi apparatus; GO:0005634,nucleus; GO:0005886,plasma membrane; GO:0005545,1-phosphatidylinositol binding; GO:0030276,clathrin binding; GO:0048268,clathrin coat assembly; GO:0006897,endocytosis	PF07651.16:ANTH domain
gene-LOC100382201	NC_050097.1	229711051	229712149	-	2.69	1.86	0.67	9.21	13.39	16.22	2.635	7.31694e-05	0.00415811	up	--	uncharacterized protein LOC100382201 precursor [Zea mays]	RecName: Full=CASP-like protein 1U2; Short=SbCASPL1U2;	RecName: Full=CASP-like protein {ECO:0000256|RuleBase:RU361233};	--	GO:0016021,integral component of membrane; GO:0005886,plasma membrane	PF04535.12:Domain of unknown function (DUF588)
gene-LOC100382222	NC_050097.1	95946806	95948542	-	2.92	3.44	5.06	10.09	12.15	6.45	1.092	7.60968e-05	0.0042832	up	K21374 7-deoxyloganetin glucosyltransferase [EC:2.4.1.324] | (RefSeq) UDP-glycosyltransferase 85A2 isoform X2 (A)	uncharacterized protein LOC100382222 [Zea mays]	RecName: Full=7-deoxyloganetin glucosyltransferase; EC=2.4.1.324; AltName: Full=Genipin glucosyltransferase; AltName: Full=UDP-glucose glucosyltransferase 2; Short=GjUGT2; AltName: Full=UDP-glycosyltransferase 85A24;	RecName: Full=Glycosyltransferase {ECO:0000256|RuleBase:RU362057}; EC=2.4.1.- {ECO:0000256|RuleBase:RU362057};	UDP-glucuronosyl and UDP-glucosyl transferase	GO:0035251,UDP-glucosyltransferase activity; GO:0008152,metabolic process	PF00201.18:UDP-glucoronosyl and UDP-glucosyl transferase
gene-LOC100382238	NC_050104.1	118103234	118104233	+	58.76	90.52	74.49	44.68	51.56	31.21	-1.042	6.26694e-08	1.05021e-05	down	K14496 abscisic acid receptor PYR/PYL family | (RefSeq) uncharacterized protein LOC100382238 (A)	uncharacterized protein LOC100382238 [Zea mays]	RecName: Full=Abscisic acid receptor PYR1; AltName: Full=ABI1-binding protein 6; AltName: Full=Protein PYRABACTIN RESISTANCE 1; AltName: Full=Regulatory components of ABA receptor 11;	SubName: Full=Abscisic acid receptor PYR1 {ECO:0000313|EMBL:AQL05457.1}; SubName: Full=Pyrabactin resistance-like protein {ECO:0000313|EMBL:AIG52075.1};	--	GO:0005737,cytoplasm; GO:0005634,nucleus; GO:0005886,plasma membrane; GO:0010427,abscisic acid binding; GO:0042802,identical protein binding; GO:0042803,protein homodimerization activity; GO:0004864,protein phosphatase inhibitor activity; GO:0004872,NA; GO:0009738,abscisic acid-activated signaling pathway; GO:0080163,regulation of protein serine/threonine phosphatase activity	PF10604.9:Polyketide cyclase / dehydrase and lipid transport
gene-LOC100382244	NC_050098.1	177036310	177038378	+	8.87	10.17	18.62	5.97	7.81	4.43	-1.265	0.000128991	0.00657076	down	K15015 solute carrier family 32 (vesicular inhibitory amino acid transporter) | (RefSeq) vacuolar amino acid transporter 1-like (A)	uncharacterized protein LOC100382244 [Zea mays]	RecName: Full=Amino acid permease 8; AltName: Full=Amino acid transporter AAP8;	SubName: Full=Amino acid permease 6 {ECO:0000313|EMBL:ONM35918.1};	Amino acid transporters	GO:0016021,integral component of membrane; GO:0016020,membrane; GO:0005886,plasma membrane; GO:0015293,symporter activity; GO:0006865,amino acid transport	PF01490.18:Transmembrane amino acid transporter protein
gene-LOC100382251	NC_050101.1	160846114	160848257	+	6.32	12.8	15.29	6.87	5.23	2.22	-1.491	0.00030879	0.0129908	down	K20624 12-hydroxyjasmonoyl-L-amino acid 12-hydroxylase / fatty acid hydroxylase [EC:1.14.14.49] | (RefSeq) cytochrome P450 94C1 (A)	uncharacterized protein LOC100382251 [Zea mays]	RecName: Full=Cytochrome P450 94C1 {ECO:0000305}; EC=1.14.14.49 {ECO:0000269|PubMed:22215670, ECO:0000269|PubMed:26164240}; AltName: Full=12-hydroxyjasmonoyl-L-amino acid 12-hydroxylase {ECO:0000303|PubMed:22215670};	SubName: Full=Uncharacterized protein {ECO:0000313|EMBL:EES19608.2};	Cytochrome P450 CYP4/CYP19/CYP26 subfamilies	GO:0005789,endoplasmic reticulum membrane; GO:0016021,integral component of membrane; GO:0043231,intracellular membrane-bounded organelle; GO:0018685,alkane 1-monooxygenase activity; GO:0020037,heme binding; GO:0005506,iron ion binding; GO:0009611,response to wounding	PF00067.22:Cytochrome P450
gene-LOC100382268	NC_050105.1	24046903	24050905	-	0.55	0.94	0.7	3.74	2.82	4.16	2.136	1.8382e-07	2.67073e-05	up	K21989 calcium permeable stress-gated cation channel | (RefSeq) CSC1-like protein RXW8 (A)	uncharacterized protein LOC100382268 [Zea mays]	RecName: Full=Calmodulin-binding protein 60 B {ECO:0000303|PubMed:11782485};	SubName: Full=Uncharacterized protein {ECO:0000313|EMBL:ACN28396.1};	--	GO:0005634,nucleus; GO:0005516,calmodulin binding; GO:0003677,DNA binding; GO:0006355,regulation of transcription, DNA-templated; GO:0006950,response to stress; GO:0006351,transcription, DNA-templated	PF07887.11:Calmodulin binding protein-like
gene-LOC100382269	NC_050098.1	173659009	173661996	+	1.1	0.65	0.33	4.26	5.01	7.43	2.762	2.48019e-05	0.00170544	up	K19882 O-palmitoleoyl-L-serine hydrolase [EC:3.1.1.98] | (RefSeq) pectin acetylesterase 5 isoform X1 (A)	uncharacterized protein LOC100382269 isoform X1 [Zea mays]	RecName: Full=Pectin acetylesterase 5 {ECO:0000303|PubMed:25115560}; EC=3.1.1.- {ECO:0000305}; Flags: Precursor;	RecName: Full=Pectin acetylesterase {ECO:0000256|RuleBase:RU363114}; EC=3.1.1.- {ECO:0000256|RuleBase:RU363114};	Pectin acetylesterase and similar proteins	GO:0005576,extracellular region; GO:0009505,plant-type cell wall; GO:0052793,pectin acetylesterase activity; GO:0071555,cell wall organization	PF03283.13:Pectinacetylesterase
gene-LOC100382295	NC_050100.1	72048898	72053148	-	14.63	27.79	34.32	17.64	8.59	10.01	-1.248	0.00152751	0.0432527	down	K00963 UTP--glucose-1-phosphate uridylyltransferase [EC:2.7.7.9] | (RefSeq) UTP--glucose-1-phosphate uridylyltransferase (A)	uncharacterized protein LOC100382295 isoform X1 [Zea mays]	RecName: Full=UTP--glucose-1-phosphate uridylyltransferase; EC=2.7.7.9; AltName: Full=UDP-glucose pyrophosphorylase; Short=UDPGP; Short=UGPase;	RecName: Full=UTP--glucose-1-phosphate uridylyltransferase {ECO:0000256|PIRNR:PIRNR000806}; EC=2.7.7.9 {ECO:0000256|PIRNR:PIRNR000806};	UDP-glucose pyrophosphorylase	GO:0005737,cytoplasm; GO:0003983,UTP:glucose-1-phosphate uridylyltransferase activity; GO:0006011,UDP-glucose metabolic process	PF01704.18:UTP--glucose-1-phosphate uridylyltransferase
gene-LOC100382359	NC_050098.1	55535466	55537811	-	2.71	1.92	2.19	0.65	1.53	0.36	-1.772	0.00144932	0.0416226	down	--	uncharacterized protein LOC100382359 [Zea mays]	RecName: Full=Cation transporter HKT8; Short=OsHKT8; AltName: Full=HKT1;5;	SubName: Full=K transporter {ECO:0000313|EMBL:AEK27028.1};	Na+/K+ transporter	GO:0016021,integral component of membrane; GO:0008324,cation transmembrane transporter activity; GO:0006814,sodium ion transport	PF02386.16:Cation transport protein
gene-LOC100382367	NC_050104.1	106075409	106076526	-	3.75	3.24	1.57	17.13	16.45	26.85	2.606	5.24194e-06	0.0004728	up	--	uncharacterized protein LOC100382367 [Zea mays]	--	SubName: Full=Uncharacterized protein {ECO:0000313|EMBL:ACN28763.1, ECO:0000313|EnsemblPlants:Zm00001d046746_P001};	--	GO:0016021,integral component of membrane	--
gene-LOC100382374	NC_050098.1	14892547	14895265	-	0.08	0.25	0.16	0.7	0.89	0.89	2.182	0.000139912	0.0069354	up	K22484 transcriptional regulator CBF1 | (RefSeq) transcription factor bHLH106-like (A)	putative HLH DNA-binding domain superfamily protein [Zea mays]	RecName: Full=Transcription factor bHLH51; AltName: Full=Basic helix-loop-helix protein 51; Short=AtbHLH51; Short=bHLH 51; AltName: Full=Transcription factor EN 57; AltName: Full=bHLH transcription factor bHLH051;	SubName: Full=BHLH transcription factor {ECO:0000313|EMBL:AIB04360.1}; SubName: Full=Transcription factor bHLH51 {ECO:0000313|EMBL:ONM29898.1};	--	GO:0005634,nucleus; GO:0003677,DNA binding; GO:0003700,DNA-binding transcription factor activity; GO:0046983,protein dimerization activity; GO:0006355,regulation of transcription, DNA-templated; GO:0006351,transcription, DNA-templated	PF00010.26:Helix-loop-helix DNA-binding domain
gene-LOC100382468	NC_050097.1	168627648	168632107	-	2.24	2.87	1.54	10.47	7.05	16.95	2.23	6.76023e-05	0.00390188	up	K17065 dynamin 1-like protein [EC:3.6.5.5] | (RefSeq) dynamin GTPase (A)	uncharacterized protein LOC100382468 isoform X3 [Zea mays]	RecName: Full=Dynamin-related protein 1C; AltName: Full=Dynamin-like protein 5; AltName: Full=Dynamin-like protein C; AltName: Full=Dynamin-like protein DLP1;	SubName: Full=Dynamin-related protein 1E {ECO:0000313|EMBL:ONM20812.1};	Vacuolar sorting protein VPS1, dynamin, and related proteins	GO:0005938,cell cortex; GO:0009504,cell plate; GO:0005737,cytoplasm; GO:0016020,membrane; GO:0005874,microtubule; GO:0009524,phragmoplast; GO:0005886,plasma membrane; GO:0009506,plasmodesma; GO:0005525,GTP binding; GO:0003924,GTPase activity; GO:0008017,microtubule binding; GO:0007049,cell cycle; GO:0051301,cell division; GO:0000266,mitochondrial fission; GO:0007005,mitochondrion organization; GO…	PF01031.20:Dynamin central region
gene-LOC100382651	NC_050098.1	222637515	222639777	+	1.28	0.66	1.17	18.54	9.79	30.15	4.071	2.17499e-10	6.54582e-08	up	K07426 cytochrome P450 family 4 subfamily B polypeptide 1 [EC:1.14.14.1] | (RefSeq) cytochrome P450 CYP72A219-like (A)	uncharacterized protein LOC100382651 [Zea mays]	RecName: Full=Cytochrome P450 72A15; EC=1.14.-.-;	SubName: Full=Cytochrome P450 CYP72A123 {ECO:0000313|EMBL:ACG29658.1}; SubName: Full=Cytochrome P450 family 72 subfamily A polypeptide 8 {ECO:0000313|EMBL:ONM40053.1};	Cytochrome P450 CYP4/CYP19/CYP26 subfamilies	GO:0016021,integral component of membrane; GO:0020037,heme binding; GO:0005506,iron ion binding; GO:0004497,monooxygenase activity; GO:0016705,oxidoreductase activity, acting on paired donors, with incorporation or reduction of molecular oxygen	PF00067.22:Cytochrome P450
gene-LOC100382776	NC_050097.1	179895568	179897074	-	0	0	0.06	0.71	0.67	1.1	5.068	4.78408e-05	0.00293962	up	--	hypothetical protein ZEAMMB73_Zm00001d005600 [Zea mays]	--	SubName: Full=Uncharacterized protein {ECO:0000313|EMBL:ONM21545.1, ECO:0000313|EnsemblPlants:Zm00001d005600_P001};	--	--	--
gene-LOC100382788	NC_050097.1	72016609	72020206	-	3.79	3.01	3.13	1.92	1.25	1.61	-1.295	0.00180328	0.0482065	down	--	uncharacterized protein LOC100382788 [Zea mays]	RecName: Full=Protein NUCLEAR FUSION DEFECTIVE 4 {ECO:0000303|PubMed:16698901};	SubName: Full=Uncharacterized protein {ECO:0000313|EMBL:ACN31236.1};	--	GO:0016021,integral component of membrane; GO:0000741,karyogamy; GO:0010197,polar nucleus fusion; GO:0009651,response to salt stress	PF06813.13:Nodulin-like
gene-LOC100382861	NC_050096.1	236793117	236795024	+	1.23	1.38	0.8	21.74	18.57	25.77	4.084	1.09105e-19	2.9254e-16	up	K11838 ubiquitin carboxyl-terminal hydrolase 7 [EC:3.4.19.12] | (RefSeq) ubiquitin carboxyl-terminal hydrolase 12-like (A)	uncharacterized protein LOC100382861 [Zea mays]	RecName: Full=Ubiquitin carboxyl-terminal hydrolase 12; EC=3.4.19.12; AltName: Full=Deubiquitinating enzyme 12; Short=AtUBP12; AltName: Full=Ubiquitin thioesterase 12; AltName: Full=Ubiquitin-specific-processing protease 12;	SubName: Full=MATH domain containing protein {ECO:0000313|EMBL:ONM05770.1}; SubName: Full=Orphans transcription factor {ECO:0000313|EMBL:AIB05848.1}; Flags: Fragment;	Speckle-type POZ protein SPOP and related proteins with TRAF, MATH and BTB/POZ domains	GO:0005737,cytoplasm; GO:0005829,cytosol; GO:0005634,nucleus; GO:0004843,thiol-dependent ubiquitin-specific protease activity; GO:0009867,jasmonic acid mediated signaling pathway; GO:0016579,protein deubiquitination; GO:0006511,ubiquitin-dependent protein catabolic process	PF00917.26:MATH domain
gene-LOC100382896	NC_050103.1	74088159	74094529	-	4.48	6.44	7.68	15.65	15.84	14.72	1.131	1.03434e-06	0.000114687	up	K01937 CTP synthase [EC:6.3.4.2] | (RefSeq) umc1385; uncharacterized protein LOC100382896 (A)	uncharacterized protein LOC100382896 [Zea mays]	--	RecName: Full=CTP synthase {ECO:0000256|RuleBase:RU810713}; EC=6.3.4.2 {ECO:0000256|RuleBase:RU810713}; AltName: Full=UTP--ammonia ligase {ECO:0000256|RuleBase:RU810713};	CTP synthase (UTP-ammonia lyase)	GO:0005524,ATP binding; GO:0003883,CTP synthase activity; GO:0044210,'de novo' CTP biosynthetic process; GO:0006541,glutamine metabolic process	PF06418.14:CTP synthase N-terminus
gene-LOC100382969	NC_050096.1	126913603	126920622	+	3.65	4.32	4.6	2.39	2.21	0.97	-1.439	1.11544e-05	0.000879643	down	K23810 (E)-8-carboxylinalool synthase [EC:1.14.14.-] | (RefSeq) GFH2; ripening-related P-450 enzyme-like (A)	uncharacterized protein LOC100382969 [Zea mays]	RecName: Full=Geraniol 8-hydroxylase; EC=1.14.13.152; AltName: Full=Cytochrome P450 76B6; AltName: Full=Geraniol 10-hydroxylase; Short=CrG10H;	SubName: Full=Cytochrome P450 family 76 subfamily C polypeptide 7 {ECO:0000313|EMBL:ONM00905.1};	Cytochrome P450 CYP2 subfamily	GO:0005789,endoplasmic reticulum membrane; GO:0016021,integral component of membrane; GO:0102811,geraniol 10-hydroxylase activity; GO:0020037,heme binding; GO:0005506,iron ion binding; GO:0016709,oxidoreductase activity, acting on paired donors, with incorporation or reduction of molecular oxygen, NAD(P)H as one donor, and incorporation of one atom of oxygen; GO:0016099,monoterpenoid biosynthetic…	PF00067.22:Cytochrome P450
gene-LOC100383029	NC_050100.1	5655575	5657103	+	0.07	0.07	0.09	1.27	1.64	2.85	4.472	3.87845e-08	7.01785e-06	up	--	hypothetical protein ZEAMMB73_Zm00001d013153 [Zea mays]	--	SubName: Full=Uncharacterized protein {ECO:0000313|EMBL:AQK62570.1, ECO:0000313|EnsemblPlants:Zm00001d013153_P001};	--	--	--
gene-LOC100383079	NC_050096.1	242984630	242987148	-	0.77	1.17	1.46	5.74	4.31	7.12	2.207	2.01955e-07	2.89149e-05	up	K22133 oxalate---CoA ligase [EC:6.2.1.8] | (RefSeq) uncharacterized LOC104443801 (A)	uncharacterized protein LOC100383079 precursor [Zea mays]	RecName: Full=L-type lectin-domain containing receptor kinase IV.1; Short=Arabidopsis thaliana lectin-receptor kinase e; Short=AthlecRK-e; Short=LecRK-IV.1; EC=2.7.11.1; AltName: Full=Lectin Receptor Kinase 1; Flags: Precursor;	SubName: Full=L-type lectin-domain containing receptor kinase V.9 {ECO:0000313|EMBL:ONM06250.1};	--	GO:0016021,integral component of membrane; GO:0005886,plasma membrane; GO:0005524,ATP binding; GO:0030246,carbohydrate binding; GO:0004674,protein serine/threonine kinase activity; GO:0009751,response to salicylic acid	PF00139.19:Legume lectin domain
gene-LOC100383090	NC_050102.1	182226981	182230546	-	0.09	0.05	0.06	0.4	0.39	0.42	2.431	0.000821876	0.0278305	up	K01859 chalcone isomerase [EC:5.5.1.6] | (RefSeq) vacuolar-sorting receptor 1-like (A)	uncharacterized protein LOC100383090 precursor [Zea mays]	RecName: Full=Vacuolar-sorting receptor 1; Short=AtVSR1; AltName: Full=BP80-like protein b; Short=AtBP80b; AltName: Full=Epidermal growth factor receptor-like protein 1; Short=AtELP; Short=AtELP1; AltName: Full=Spot 3 protein; Flags: Precursor;	SubName: Full=Vacuolar-sorting receptor 1 {ECO:0000313|EMBL:ONM60620.1};	--	GO:0030665,clathrin-coated vesicle membrane; GO:0005783,endoplasmic reticulum; GO:0005794,Golgi apparatus; GO:0000139,Golgi membrane; GO:0016021,integral component of membrane; GO:0005770,late endosome; GO:0031902,late endosome membrane; GO:0005886,plasma membrane; GO:0005802,trans-Golgi network; GO:0009940,amino-terminal vacuolar sorting propeptide binding; GO:0005509,calcium ion binding; GO:000…	PF02225.22:PA domain
gene-LOC100383092	NC_050097.1	34532907	34536255	+	6.08	7.91	10.77	20.97	29.97	17.1	1.238	2.2994e-06	0.000231462	up	K00079 carbonyl reductase 1 [EC:1.1.1.184 1.1.1.189 1.1.1.197] | (RefSeq) uncharacterized protein LOC100383092 isoform X1 (A)	uncharacterized protein LOC100383092 isoform X1 [Zea mays]	RecName: Full=(+)-neomenthol dehydrogenase {ECO:0000303|PubMed:18599651}; EC=1.1.1.- {ECO:0000269|PubMed:21169366}; EC=1.1.1.208 {ECO:0000269|PubMed:18599651}; AltName: Full=Menthone:neomenthol reductase; AltName: Full=Short-chain dehydrogenase/reductase 1; Short=AtSDR1;	SubName: Full=NAD(P)-binding Rossmann-fold superfamily protein {ECO:0000313|EMBL:ONM16308.1};	Dehydrogenases with different specificities (related to short-chain alcohol dehydrogenases)	GO:0005737,cytoplasm; GO:0047501,(+)-neomenthol dehydrogenase activity; GO:0006952,defense response	PF00106.25:short chain dehydrogenase
gene-LOC100383210	NC_050100.1	219126568	219130006	-	17.46	17.13	21.05	73.87	66.73	110.07	2.013	1.50793e-06	0.000158839	up	K10534 nitrate reductase (NAD(P)H) [EC:1.7.1.1 1.7.1.2 1.7.1.3] | (RefSeq) nitrate reductase [NAD(P)H] (A)	nitrate reductase [NAD(P)H]	RecName: Full=Nitrate reductase [NAD(P)H]; EC=1.7.1.2;	RecName: Full=Nitrate reductase {ECO:0000256|PIRNR:PIRNR000233};	Sulfite oxidase, molybdopterin-binding component	GO:0020037,heme binding; GO:0030151,molybdenum ion binding; GO:0043546,molybdopterin cofactor binding; GO:0050464,nitrate reductase (NADPH) activity; GO:0050463,nitrate reductase [NAD(P)H] activity; GO:0042128,nitrate assimilation; GO:0006809,nitric oxide biosynthetic process	PF00174.19:Oxidoreductase molybdopterin binding domain
gene-LOC100383317	NC_050103.1	5879638	5883711	-	1.36	1.69	0.99	6.22	3.24	7.81	1.933	0.000350575	0.0143211	up	--	uncharacterized protein LOC100383317 [Zea mays]	--	SubName: Full=Alpha/beta-Hydrolases superfamily protein {ECO:0000313|EMBL:AQK89608.1};	--	GO:0016021,integral component of membrane; GO:0016787,hydrolase activity; GO:0006629,lipid metabolic process	PF01764.25:Lipase (class 3)
gene-LOC100383323	NC_050102.1	181831463	181833059	+	7.12	4.67	8	30.4	20.94	30.9	1.846	2.48063e-05	0.00170544	up	K00430 peroxidase [EC:1.11.1.7] | (RefSeq) uncharacterized protein LOC100383323 precursor (A)	peroxidase3 [Zea mays]	RecName: Full=Peroxidase 2; EC=1.11.1.7; Flags: Precursor;	RecName: Full=Peroxidase {ECO:0000256|RuleBase:RU362060, ECO:0000256|SAAS:SAAS00709852}; EC=1.11.1.7 {ECO:0000256|RuleBase:RU362060, ECO:0000256|SAAS:SAAS00709852};	--	GO:0005576,extracellular region; GO:0020037,heme binding; GO:0046872,metal ion binding; GO:0004601,peroxidase activity; GO:0042744,hydrogen peroxide catabolic process; GO:0006979,response to oxidative stress	PF00141.23:Peroxidase
gene-LOC100383369	NC_050099.1	170911521	170913689	+	43.85	39.27	33.19	15.52	20.59	12.37	-1.549	3.01912e-06	0.000291	down	K09338 homeobox-leucine zipper protein | (RefSeq) pco078109; putative homeobox DNA-binding and leucine zipper domain family protein isoform 1 (A)	putative homeobox DNA-binding and leucine zipper domain family protein isoform X1 [Zea mays]	RecName: Full=Homeobox-leucine zipper protein HOX16; AltName: Full=HD-ZIP protein HOX16; AltName: Full=Homeodomain transcription factor HOX16; AltName: Full=OsHox16;	SubName: Full=Putative homeobox DNA-binding and leucine zipper domain family protein isoform 1 {ECO:0000313|EMBL:AQK55062.1};	Transcription factor HEX, contains HOX and HALZ domains	GO:0005634,nucleus; GO:0003700,DNA-binding transcription factor activity; GO:0043565,sequence-specific DNA binding; GO:0006351,transcription, DNA-templated	PF02183.18:Homeobox associated leucine zipper
gene-LOC100383438	NC_050097.1	39704084	39711182	+	25.09	50.59	50.73	29.31	26.54	11.46	-1.14	0.0010125	0.0319769	down	K00276 primary-amine oxidase [EC:1.4.3.21] | (RefSeq) uncharacterized protein LOC8073581 (A)	uncharacterized protein LOC100383438 isoform X1 [Zea mays]	RecName: Full=Primary amine oxidase; EC=1.4.3.21 {ECO:0000250|UniProtKB:P12807}; AltName: Full=Amine oxidase [copper-containing]; Flags: Precursor;	RecName: Full=Amine oxidase {ECO:0000256|RuleBase:RU000672}; EC=1.4.3.- {ECO:0000256|RuleBase:RU000672};	Copper amine oxidase	GO:0052595,aliphatic-amine oxidase activity; GO:0052594,aminoacetone:oxygen oxidoreductase(deaminating) activity; GO:0005507,copper ion binding; GO:0052597,diamine oxidase activity; GO:0052596,phenethylamine:oxygen oxidoreductase (deaminating) activity; GO:0008131,primary amine oxidase activity; GO:0048038,quinone binding; GO:0052593,tryptamine:oxygen oxidoreductase (deaminating) activity; GO:000…	PF01179.20:Copper amine oxidase, enzyme domain
gene-LOC100383494	NC_050103.1	62861887	62864328	-	0.03	0.16	0.24	1.69	1.24	0.39	2.732	0.000292053	0.0124477	up	K14638 solute carrier family 15 (peptide/histidine transporter), member 3/4 | (RefSeq) protein NRT1/ PTR FAMILY 8.3-like (A)	uncharacterized protein LOC100383494 [Zea mays]	RecName: Full=Protein NRT1/ PTR FAMILY 6.2; Short=AtNPF6.2; AltName: Full=Nitrate transporter 1.4;	SubName: Full=Protein NRT1/ PTR FAMILY 6.2 {ECO:0000313|EMBL:AQK91821.1};	H+/oligopeptide symporter	GO:0016021,integral component of membrane; GO:0015293,symporter activity; GO:0042128,nitrate assimilation; GO:0006857,oligopeptide transport; GO:0009753,response to jasmonic acid; GO:0009611,response to wounding	PF00854.21:POT family
gene-LOC100383497	NC_050103.1	39777888	39805176	-	8.18	5.45	3.98	1.96	2.62	2.42	-1.617	0.00124005	0.0371309	down	K19882 O-palmitoleoyl-L-serine hydrolase [EC:3.1.1.98] | (RefSeq) pectin acetylesterase 3 (A)	uncharacterized protein LOC100383497 isoform X1 [Zea mays]	RecName: Full=Pectin acetylesterase 3 {ECO:0000303|PubMed:25115560}; EC=3.1.1.- {ECO:0000305}; Flags: Precursor;	RecName: Full=Pectin acetylesterase {ECO:0000256|RuleBase:RU363114}; EC=3.1.1.- {ECO:0000256|RuleBase:RU363114};	Pectin acetylesterase and similar proteins	GO:0005576,extracellular region; GO:0009505,plant-type cell wall; GO:0052793,pectin acetylesterase activity; GO:0071555,cell wall organization	PF03283.13:Pectinacetylesterase
gene-LOC100383556	NC_050100.1	102215360	102218069	-	9.14	23.22	28.78	12.41	10.15	6.41	-1.254	0.00122214	0.0367813	down	K13456 RPM1-interacting protein 4 | (RefSeq) RPM1-interacting protein 4-like (A)	uncharacterized protein LOC100383556 [Zea mays]	--	SubName: Full=Uncharacterized protein {ECO:0000313|EMBL:AQK69234.1, ECO:0000313|EnsemblPlants:Zm00001d015638_P004};	--	--	PF05627.11:Cleavage site for pathogenic type III effector avirulence factor Avr
gene-LOC100383588	NC_050101.1	178284143	178285165	-	2.42	4.03	5.64	2.69	2.06	1.32	-1.202	0.00136197	0.0395763	down	--	uncharacterized protein LOC100383588 [Zea mays]	--	SubName: Full=Plant basic secretory protein (BSP) family protein {ECO:0000313|EMBL:AQK88823.1};	--	--	PF04450.12:Peptidase of plants and bacteria
gene-LOC100383595	NC_050096.1	184677752	184679626	-	1.97	0.8	0.53	17.99	19	38.47	4.257	8.00819e-09	1.67513e-06	up	K08900 mitochondrial chaperone BCS1 | (RefSeq) AAA-ATPase ASD, mitochondrial-like (A)	uncharacterized protein LOC100383595 precursor [Zea mays]	RecName: Full=AAA-ATPase ASD, mitochondrial; EC=3.6.1.3 {ECO:0000269|PubMed:21359673}; AltName: Full=AAA-ATPase 1; AltName: Full=Protein ATPASE-IN-SEED-DEVELOPMENT {ECO:0000303|PubMed:21359673};	SubName: Full=AAA-ATPase ASD mitochondrial {ECO:0000313|EMBL:ONM02348.1};	AAA+-type ATPase	GO:0005783,endoplasmic reticulum; GO:0016021,integral component of membrane; GO:0031966,mitochondrial membrane; GO:0005739,mitochondrion; GO:0005524,ATP binding; GO:0016887,ATPase activity; GO:0010154,fruit development; GO:0009737,response to abscisic acid; GO:0009409,response to cold; GO:0009651,response to salt stress; GO:0009414,response to water deprivation; GO:0010431,seed maturation	PF14363.6:Domain associated at C-terminal with AAA
gene-LOC100383620	NC_050097.1	45197211	45201478	-	1.56	1.81	1.96	4.11	9.31	3.24	1.368	0.000944908	0.0303916	up	K08139 MFS transporter, SP family, sugar:H+ symporter | (RefSeq) sugar carrier protein C-like (A)	uncharacterized protein LOC100383620 [Zea mays]	RecName: Full=Sugar transport protein MST1 {ECO:0000305}; AltName: Full=Monosaccharide transporter 1 {ECO:0000303|PubMed:11038054}; Short=OsMST1 {ECO:0000303|PubMed:11038054}; AltName: Full=Sugar:proton symporter MST1 {ECO:0000305};	SubName: Full=Uncharacterized protein {ECO:0000313|EMBL:ACN34737.1};	Predicted transporter (major facilitator superfamily)	GO:0016021,integral component of membrane; GO:0005355,glucose transmembrane transporter activity; GO:0005351,carbohydrate:proton symporter activity; GO:0046323,glucose import; GO:0035428,NA	PF00083.24:Sugar (and other) transporter
gene-LOC100383693	NC_050100.1	208740287	208742538	+	12.53	23.12	23.43	9.88	8.64	7.27	-1.379	4.69888e-09	1.04202e-06	down	K09843 (+)-abscisic acid 8'-hydroxylase [EC:1.14.13.93] | (RefSeq) putative cytochrome P450 superfamily protein precursor (A)	putative cytochrome P450 superfamily protein precursor [Zea mays]	RecName: Full=Abscisic acid 8'-hydroxylase 1; Short=ABA 8'-hydroxylase 1; EC=1.14.13.93; AltName: Full=Cytochrome P450 707A5; AltName: Full=OsABA8ox1;	SubName: Full=Abscisic acid 8'-hydroxylase1 {ECO:0000313|EMBL:AQK73980.1};	Cytochrome P450 CYP4/CYP19/CYP26 subfamilies	GO:0005789,endoplasmic reticulum membrane; GO:0016021,integral component of membrane; GO:0010295,(+)-abscisic acid 8'-hydroxylase activity; GO:0020037,heme binding; GO:0005506,iron ion binding; GO:0016709,oxidoreductase activity, acting on paired donors, with incorporation or reduction of molecular oxygen, NAD(P)H as one donor, and incorporation of one atom of oxygen; GO:0046345,abscisic acid cat…	PF00067.22:Cytochrome P450
gene-LOC100383808	NC_050102.1	129030028	129059825	+	0.13	0.29	0.43	1.01	1.01	1.67	2.032	0.000357615	0.0145684	up	K03549 KUP system potassium uptake protein | (RefSeq) HAK17; uncharacterized protein LOC100383808 (A)	uncharacterized protein LOC100383808 isoform X3 [Zea mays]	RecName: Full=Probable potassium transporter 17; AltName: Full=OsHAK17;	RecName: Full=Potassium transporter {ECO:0000256|RuleBase:RU321113};	--	GO:0016021,integral component of membrane; GO:0016020,membrane; GO:0015079,potassium ion transmembrane transporter activity	PF02705.16:K+ potassium transporter
gene-LOC100383815	NC_050104.1	158057717	158059836	+	6.59	6.84	6.13	15.39	19.92	18.09	1.229	0.000112317	0.00587355	up	K20628 expansin | (RefSeq) expansin-B3-like (A)	uncharacterized protein LOC100383815 isoform X1 [Zea mays]	RecName: Full=Expansin-like A1; AltName: Full=OsEXLA1; AltName: Full=OsEXPL1; AltName: Full=OsaEXPb2.1; Flags: Precursor;	SubName: Full=Expansin-like A2 {ECO:0000313|EMBL:AQL09462.1};	--	GO:0005576,extracellular region	PF01357.21:Pollen allergen
gene-LOC100383991	NC_050101.1	122708565	122709923	+	13.02	14.04	17.5	31.57	50.03	45.37	1.318	9.29375e-05	0.00505738	up	K00020 3-hydroxyisobutyrate dehydrogenase [EC:1.1.1.31] | (RefSeq) 6-phosphogluconate dehydrogenase-like protein (A)	uncharacterized protein LOC100383991 precursor [Zea mays]	RecName: Full=Protein EXORDIUM; Flags: Precursor;	SubName: Full=Protein EXORDIUM {ECO:0000313|EMBL:AQK83273.1};	--	GO:0048046,apoplast; GO:0005618,cell wall; GO:0005615,extracellular space; GO:0005794,Golgi apparatus; GO:0009505,plant-type cell wall; GO:0009741,response to brassinosteroid	PF04674.12:Phosphate-induced protein 1 conserved region
gene-LOC100384044	NC_050098.1	230083282	230090876	-	0.62	0.8	0.89	3.41	2.11	4.39	1.971	2.10537e-05	0.00150353	up	K08712 ATP-binding cassette, subfamily G (WHITE), member 2, SNQ2 | (RefSeq) ABC transporter, ATP-binding protein (A)	uncharacterized LOC100384044 isoform X2 [Zea mays]	RecName: Full=ABC transporter G family member 36 {ECO:0000303|PubMed:18299247}; Short=OsABCG36 {ECO:0000303|PubMed:18299247}; AltName: Full=Pleiotropic drug resistance protein 9 {ECO:0000303|PubMed:12644668, ECO:0000303|PubMed:16506311}; Short=OsPDR9 {ECO:0000303|PubMed:16506311};	SubName: Full=ABC transporter G family member 40 {ECO:0000313|EMBL:ONM41196.1};	Pleiotropic drug resistance proteins (PDR1-15), ABC superfamily	GO:0016021,integral component of membrane; GO:0005886,plasma membrane; GO:0005524,ATP binding; GO:0042626,ATPase activity, coupled to transmembrane movement of substances	PF01061.24:ABC-2 type transporter
gene-LOC100384163	NC_050099.1	168977812	168979293	+	11.82	3.04	2.96	0.93	1.46	1.7	-2.476	0.00158526	0.0444022	down	--	uncharacterized protein LOC100384163 [Zea mays]	--	SubName: Full=DUF506 family protein {ECO:0000313|EMBL:AQK55001.1};	--	--	PF04720.12:PDDEXK-like family of unknown function
gene-LOC100384222	NC_050102.1	126580081	126582140	-	78.09	69.8	59.5	15.34	17.78	22.7	-2.104	6.13549e-07	7.29543e-05	down	K13464 jasmonate ZIM domain-containing protein | (RefSeq) umc1585; uncharacterized LOC100384222 (A)	uncharacterized LOC100384222 [Zea mays]	RecName: Full=Protein TIFY 10c {ECO:0000305};	SubName: Full=TIFY25 {ECO:0000313|EMBL:AND66109.1}; SubName: Full=ZIM transcription factor {ECO:0000313|EMBL:AIB05448.1}; SubName: Full=ZIM-transcription factor 28 {ECO:0000313|EMBL:ONM55267.1};	--	GO:0005829,cytosol; GO:0005634,nucleus; GO:0006952,defense response; GO:0006355,regulation of transcription, DNA-templated; GO:0006351,transcription, DNA-templated	PF09425.10:Divergent CCT motif
gene-LOC100384300	NC_050096.1	152367865	152369855	-	0.04	0.29	0.14	2.69	1.4	3.95	4.017	4.81837e-07	6.04737e-05	up	K09422 transcription factor MYB, plant | (RefSeq) MYB100; putative MYB DNA-binding domain superfamily protein (A)	putative MYB DNA-binding domain superfamily protein [Zea mays]	RecName: Full=Transcription factor JAMYB {ECO:0000305}; AltName: Full=OsJAMyb {ECO:0000303|PubMed:11310740};	SubName: Full=MYB transcription factor {ECO:0000313|EMBL:AIB05129.1}; SubName: Full=MYB-transcription factor 100 {ECO:0000313|EMBL:ONM01234.1};	Transcription factor, Myb superfamily	GO:0005634,nucleus; GO:0000981,DNA-binding transcription factor activity, RNA polymerase II-specific; GO:0043565,sequence-specific DNA binding; GO:0001135,RNA polymerase II transcription regulator recruiting activity; GO:0044212,transcription regulatory region DNA binding; GO:0030154,cell differentiation; GO:0006952,defense response; GO:0006357,regulation of transcription by RNA polymerase II; GO…	PF00249.31:Myb-like DNA-binding domain
gene-LOC100384341	NC_050096.1	71687578	71691095	-	2.55	3.01	3.47	0.99	1.03	0.3	-2.233	4.63898e-08	8.09597e-06	down	K06685 MOB kinase activator 1 | (RefSeq) uncharacterized protein LOC100384341 (A)	uncharacterized protein LOC100384341 [Zea mays]	RecName: Full=MOB kinase activator-like 1A; AltName: Full=Mob1 homolog 1A; AltName: Full=Mps one binder kinase activator-like 1A; AltName: Full=MsMob1-1 {ECO:0000303|PubMed:16240174}; AltName: Full=MsMob1-2 {ECO:0000303|PubMed:16240174}; AltName: Full=MsMob1-3 {ECO:0000303|PubMed:16240174}; AltName: Full=MsMob1-A {ECO:0000303|PubMed:16460730};	SubName: Full=MOB kinase activator-like 2A {ECO:0000313|EMBL:ONL98824.1};	Cell cycle-associated protein Mob1-1	GO:0005737,cytoplasm; GO:0005856,cytoskeleton; GO:0009524,phragmoplast; GO:0046872,metal ion binding	PF03637.17:Mob1/phocein family
gene-LOC100384373	NC_050098.1	232755889	232757519	+	0.42	0.47	0.36	43.9	62.13	75.48	7.031	8.37849e-42	1.23558e-37	up	K19720 collagen, type III, alpha | (RefSeq) hypothetical protein (A)	zinc finger protein [Zea mays]	RecName: Full=Zinc finger protein VAR3, chloroplastic {ECO:0000305}; AltName: Full=Organelle Zinc finger 1 {ECO:0000303|PubMed:25768119}; AltName: Full=Protein VARIEGATED 3 {ECO:0000303|PubMed:15340011}; Flags: Precursor;	SubName: Full=Ran BP2/NZF zinc finger-like superfamily protein {ECO:0000313|EMBL:ONM41511.1};	RNA-binding Ran Zn-finger protein and related proteins	GO:0009507,chloroplast; GO:0009570,chloroplast stroma; GO:0046872,metal ion binding; GO:1900871,chloroplast mRNA modification; GO:0009658,chloroplast organization; GO:0006397,mRNA processing	PF00641.18:Zn-finger in Ran binding protein and others
gene-LOC100384472	NC_050098.1	158072351	158077083	-	0.19	0.07	0.28	4.65	2.39	5.66	4.383	7.8455e-11	2.7547e-08	up	K03549 KUP system potassium uptake protein | (RefSeq) kup1; potasium ion uptake permease 1 (A)	potasium ion uptake permease 1 [Zea mays]	RecName: Full=Potassium transporter 5; AltName: Full=OsHAK5;	RecName: Full=Potassium transporter {ECO:0000256|RuleBase:RU321113};	--	GO:0016021,integral component of membrane; GO:0016020,membrane; GO:0015079,potassium ion transmembrane transporter activity	PF02705.16:K+ potassium transporter
gene-LOC100384705	NC_050100.1	214491792	214494476	+	2.06	3.84	4.84	11.56	16.55	6.17	1.442	0.000106333	0.00559034	up	--	Serine/threonine-protein kinase WNK (With No Lysine)-related [Zea mays]	RecName: Full=Protein RICE SALT SENSITIVE 3 {ECO:0000303|PubMed:23715469};	SubName: Full=Serine/threonine-protein kinase WNK (With No Lysine)-related {ECO:0000313|EMBL:AQK74788.1};	--	GO:0005737,cytoplasm; GO:0005634,nucleus; GO:0006355,regulation of transcription, DNA-templated; GO:0006351,transcription, DNA-templated	PF14215.6:bHLH-MYC and R2R3-MYB transcription factors N-terminal
gene-LOC100384718	NC_050104.1	108652390	108653538	+	3.33	6.56	2.96	21.7	13.2	32.46	2.282	5.88229e-05	0.00349782	up	K09510 DnaJ homolog subfamily B member 4 | (RefSeq) dnaJ homolog subfamily B member 4 isoform X1 (A)	uncharacterized protein LOC100384718 [Zea mays]	RecName: Full=Chaperone protein dnaJ 8, chloroplastic; Short=AtDjC8; Short=AtJ8; Flags: Precursor;	SubName: Full=Chaperone protein dnaJ 8 chloroplastic {ECO:0000313|EMBL:AQL05050.1};	Molecular chaperone (DnaJ superfamily)	GO:0009507,chloroplast; GO:0009570,chloroplast stroma; GO:0005634,nucleus; GO:0009416,response to light stimulus	PF00226.31:DnaJ domain
gene-LOC100384761	NC_050097.1	212323297	212330200	+	0.85	1.01	1.32	2.77	2.42	2.55	1.089	0.000663745	0.0236431	up	--	putative DNA-binding bromodomain-containing family protein [Zea mays]	--	SubName: Full=Uncharacterized protein {ECO:0000313|EMBL:ACR34507.1};	--	--	PF00439.25:Bromodomain
gene-LOC100384802	NC_050096.1	284779572	284781613	+	1.1	1.6	2.06	4.3	4.97	4.17	1.307	4.43668e-06	0.000408923	up	K16266 cyanohydrin UDP-glucosyltransferase [EC:2.4.1.-] | (RefSeq) linamarin synthase 1 (A)	UDP-glycosyltransferase 83A1 [Zea mays]	RecName: Full=UDP-glycosyltransferase 83A1; EC=2.4.1.-;	SubName: Full=UDP-glycosyltransferase 83A1 {ECO:0000313|EMBL:ONM09492.1};	UDP-glucuronosyl and UDP-glucosyl transferase	GO:0043231,intracellular membrane-bounded organelle; GO:0080043,quercetin 3-O-glucosyltransferase activity; GO:0080044,quercetin 7-O-glucosyltransferase activity; GO:0008152,metabolic process	PF00201.18:UDP-glucoronosyl and UDP-glucosyl transferase
gene-LOC100384836	NC_050101.1	161501322	161503054	-	6.43	8.02	5.42	51.47	39.09	82.07	2.974	2.41147e-09	6.02745e-07	up	--	uncharacterized protein LOC100384836 [Zea mays]	--	SubName: Full=Uncharacterized protein {ECO:0000313|EMBL:ACR34685.1, ECO:0000313|EnsemblPlants:Zm00001d038325_P001};	--	GO:0016021,integral component of membrane	PF06749.12:Protein of unknown function (DUF1218)
gene-LOC100500707	NC_050104.1	3414740	3416781	-	0.86	0.71	1.17	0.12	0.3	0.37	-1.96	0.00176696	0.0475932	down	K21485 anthranilate O-methyltransferase [EC:2.1.1.277] | (RefSeq) anthranilate O-methyltransferase 2 isoform X1 (A)	anthranilic acid methyltransferase 1 [Zea mays]	RecName: Full=Anthranilate O-methyltransferase 1; EC=2.1.1.277; AltName: Full=Anthranilic acid methyltransferase 1; AltName: Full=O-methyltransferase 1;	SubName: Full=Salicylate/benzoate carboxyl methyltransferase {ECO:0000313|EMBL:AQL00846.1};	--	GO:0008168,methyltransferase activity; GO:0006952,defense response	PF03492.15:SAM dependent carboxyl methyltransferase
gene-LOC100500980	NC_050103.1	150454699	150455324	-	151.56	83.05	46.16	811.6	1437.5	1124.02	3.255	8.61451e-08	1.38839e-05	up	--	--	--	--	--	--	--
gene-LOC100501068	NC_050105.1	76032899	76037509	-	1.03	2.01	3.7	8.72	14.8	11.32	2.231	9.68829e-07	0.000108649	up	K05681 ATP-binding cassette, subfamily G (WHITE), member 2 | (RefSeq) ABC transporter G family member 9-like (A)	uncharacterized protein LOC100501068 isoform X1 [Zea mays]	RecName: Full=ABC transporter G family member 14; Short=ABC transporter ABCG.14; Short=AtABCG14; AltName: Full=White-brown complex homolog protein 14; Short=AtWBC14;	SubName: Full=ABC transporter G family member 14 {ECO:0000313|EMBL:AQK41301.1};	Transporter, ABC superfamily (Breast cancer resistance protein)	GO:0016021,integral component of membrane; GO:0005886,plasma membrane; GO:0005524,ATP binding; GO:0042626,ATPase activity, coupled to transmembrane movement of substances; GO:0010588,cotyledon vascular tissue pattern formation; GO:0010222,stem vascular tissue pattern formation	PF01061.24:ABC-2 type transporter
gene-LOC100501100	NC_050096.1	7432900	7434829	-	2.85	6.02	1.04	19.33	16.99	27.91	2.548	0.000146081	0.00716889	up	K00521 ferric-chelate reductase [EC:1.16.1.7] | (RefSeq) ferric reduction oxidase 7, chloroplastic-like (A)	uncharacterized protein LOC100501100 [Zea mays]	RecName: Full=NAC domain-containing protein 22 {ECO:0000303|PubMed:15029955}; Short=ONAC022 {ECO:0000303|PubMed:15029955};	SubName: Full=NAC-transcription factor 53 {ECO:0000313|EMBL:ONL93378.1};	--	GO:0005634,nucleus; GO:0043565,sequence-specific DNA binding; GO:1901002,positive regulation of response to salt stress; GO:1902584,positive regulation of response to water deprivation; GO:0045893,positive regulation of transcription, DNA-templated; GO:0006351,transcription, DNA-templated	PF02365.15:No apical meristem (NAM) protein
gene-LOC100501142	NC_050097.1	15774262	15776521	+	0.07	0.28	0.36	2.85	4.23	2.25	3.508	2.70877e-12	1.28859e-09	up	K24028 salicylic acid 3-hydroxylase [EC:1.14.11.-] | (RefSeq) protein DMR6-LIKE OXYGENASE 1 (A)	protein DMR6-LIKE OXYGENASE 1 [Zea mays]	RecName: Full=Protein DMR6-LIKE OXYGENASE 1 {ECO:0000303|PubMed:25376907}; EC=1.14.11.- {ECO:0000255|PROSITE-ProRule:PRU00805}; AltName: Full=2-oxoglutarate (2OG)-Fe(II) oxygenase-like protein DLO1 {ECO:0000303|PubMed:25376907}; AltName: Full=Protein SENESCENCE-ASSOCIATED GENE 108 {ECO:0000303|PubMed:23959884}; AltName: Full=Salicylate 3-hydroxylase DLO1 {ECO:0000303|PubMed:23959884}; Short=S3H D…	SubName: Full=Protein DMR6-LIKE OXYGENASE 2 {ECO:0000313|EMBL:ONM14668.1};	Iron/ascorbate family oxidoreductases	GO:0051213,dioxygenase activity; GO:0046872,metal ion binding; GO:0002229,defense response to oomycetes; GO:0010150,leaf senescence; GO:0009617,response to bacterium; GO:0009620,response to fungus; GO:0002239,response to oomycetes; GO:0009751,response to salicylic acid; GO:0046244,salicylic acid catabolic process	PF03171.20:2OG-Fe(II) oxygenase superfamily
gene-LOC100501330	NC_050096.1	233766550	233777315	-	1.06	2.98	2.83	7.06	7.01	3.68	1.174	0.00152955	0.0432527	up	K07466 replication factor A1 | (RefSeq) uncharacterized protein LOC100501330 (A)	uncharacterized protein LOC100501330 [Zea mays]	--	SubName: Full=Uncharacterized protein {ECO:0000313|EMBL:ACR35419.1};	Single-stranded DNA-binding replication protein A (RPA), large (70 kD) subunit and related ssDNA-binding proteins	--	PF08646.10:Replication factor-A C terminal domain
gene-LOC100501504	NC_050100.1	223691913	223694917	-	3.06	3.71	4.47	1.76	2.07	0.93	-1.49	1.39117e-07	2.14823e-05	down	K15397 3-ketoacyl-CoA synthase [EC:2.3.1.199] | (RefSeq) 3-ketoacyl-CoA synthase 12 (A)	3-ketoacyl-CoA synthase 12 [Zea mays]	RecName: Full=3-ketoacyl-CoA synthase 12 {ECO:0000303|PubMed:18465198}; Short=KCS-12 {ECO:0000303|PubMed:18465198}; EC=2.3.1.199 {ECO:0000305}; AltName: Full=Very long-chain fatty acid condensing enzyme 12 {ECO:0000303|PubMed:18465198}; Short=VLCFA condensing enzyme 12 {ECO:0000303|PubMed:18465198}; Flags: Precursor;	RecName: Full=3-ketoacyl-CoA synthase {ECO:0000256|PIRNR:PIRNR036417}; EC=2.3.1.- {ECO:0000256|PIRNR:PIRNR036417};	--	GO:0005783,endoplasmic reticulum; GO:0016020,membrane; GO:0102336,3-oxo-arachidoyl-CoA synthase activity; GO:0102337,3-oxo-cerotoyl-CoA synthase activity; GO:0102338,3-oxo-lignoceronyl-CoA synthase activity; GO:0102756,very-long-chain 3-ketoacyl-CoA synthase activity; GO:0006633,fatty acid biosynthetic process	PF08392.12:FAE1/Type III polyketide synthase-like protein
gene-LOC100501598	NC_050096.1	235844022	235848651	+	3.66	3.07	1.51	11.79	10.55	23.41	2.283	0.000314623	0.0131437	up	--	glutaredoxin-related [Zea mays]	--	SubName: Full=Glutaredoxin-related {ECO:0000313|EMBL:ONM05693.1};	--	GO:0005622,intracellular; GO:0009055,electron transfer activity; GO:0015035,protein disulfide oxidoreductase activity; GO:0045454,cell redox homeostasis; GO:0035556,intracellular signal transduction	PF04784.14:Protein of unknown function, DUF547
gene-LOC100501619	NC_050099.1	137540405	137542026	+	0.82	1.01	1.91	3.3	5.45	3.09	1.446	0.000786338	0.0269991	up	--	uncharacterized protein LOC100501619 [Zea mays]	RecName: Full=BAG family molecular chaperone regulator 3; AltName: Full=Bcl-2-associated athanogene 3;	SubName: Full=Ubiquitin-like superfamily protein {ECO:0000313|EMBL:AQK53408.1};	--	GO:0051087,chaperone binding	PF00240.23:Ubiquitin family
gene-LOC100501657	NC_050102.1	5573971	5576485	+	6.51	8.49	5.46	17.15	17.2	24.74	1.358	0.00123207	0.0370237	up	--	uncharacterized protein LOC100501657 isoform 2 [Zea mays]	--	SubName: Full=Uncharacterized protein {ECO:0000313|EMBL:ACR35842.1};	--	--	--
gene-LOC100501661	NC_050098.1	224608416	224609573	+	7.43	16.42	4.45	39.38	37.58	72.45	2.287	0.000226371	0.0102008	up	--	uncharacterized protein LOC100501661 precursor [Zea mays]	--	SubName: Full=Uncharacterized protein {ECO:0000313|EMBL:ACR36250.1, ECO:0000313|EnsemblPlants:Zm00001d044235_P001};	--	--	PF00139.19:Legume lectin domain
gene-LOC100501680	NC_050101.1	92378188	92379697	+	1.1	1.55	1.72	6.51	5.64	15.19	2.567	1.56861e-05	0.00117126	up	K00521 ferric-chelate reductase [EC:1.16.1.7] | (RefSeq) ferric reduction oxidase 7, chloroplastic-like (A)	putative NAC domain transcription factor superfamily protein [Zea mays]	RecName: Full=NAC domain-containing protein 22 {ECO:0000303|PubMed:15029955}; Short=ONAC022 {ECO:0000303|PubMed:15029955};	SubName: Full=NAC42 NAC type transcription factor {ECO:0000313|EMBL:AFT82662.1}; Flags: Fragment;	--	GO:0005634,nucleus; GO:0043565,sequence-specific DNA binding; GO:1901002,positive regulation of response to salt stress; GO:1902584,positive regulation of response to water deprivation; GO:0045893,positive regulation of transcription, DNA-templated; GO:0006351,transcription, DNA-templated	PF02365.15:No apical meristem (NAM) protein
gene-LOC100501753	NC_050098.1	222391873	222394187	-	2.61	5.71	2.02	11.94	11.81	22.27	2.046	0.000393501	0.0157049	up	K07426 cytochrome P450 family 4 subfamily B polypeptide 1 [EC:1.14.14.1] | (RefSeq) cytochrome P450 CYP72A219-like (A)	uncharacterized protein LOC100501753 [Zea mays]	RecName: Full=Cytochrome P450 72A14; EC=1.14.-.-;	SubName: Full=Uncharacterized protein {ECO:0000313|EMBL:ACN28870.1};	Cytochrome P450 CYP4/CYP19/CYP26 subfamilies	GO:0016021,integral component of membrane; GO:0020037,heme binding; GO:0005506,iron ion binding; GO:0004497,monooxygenase activity; GO:0016705,oxidoreductase activity, acting on paired donors, with incorporation or reduction of molecular oxygen	PF00067.22:Cytochrome P450
gene-LOC100501754	NC_050099.1	33207456	33213607	+	175.73	214.63	225.23	124.57	102.85	85.19	-1.202	6.96222e-10	1.97446e-07	down	K20923 mixed-linked glucan synthase [EC:2.4.1.-] | (RefSeq) uncharacterized protein LOC100501754 (A)	uncharacterized protein LOC100501754 [Zea mays]	RecName: Full=Probable mixed-linked glucan synthase 6; EC=2.4.1.-; AltName: Full=1,3;1,4-beta-D-glucan synthase 6; AltName: Full=Cellulose synthase-like protein F6; AltName: Full=OsCslF6;	SubName: Full=CslF6-2 {ECO:0000313|EMBL:AKJ66178.1}; SubName: Full=Putative cellulose synthase-like family protein {ECO:0000313|EMBL:AQK50685.1};	--	GO:0005794,Golgi apparatus; GO:0000139,Golgi membrane; GO:0016021,integral component of membrane; GO:0016760,cellulose synthase (UDP-forming) activity; GO:0051753,mannan synthase activity; GO:0071555,cell wall organization; GO:0030244,cellulose biosynthetic process; GO:0071669,plant-type cell wall organization or biogenesis	PF03552.14:Cellulose synthase
gene-LOC100501794	NC_050102.1	185400095	185403165	+	1.24	1.42	1.73	3.59	3.35	3.67	1.084	0.000341772	0.0140198	up	--	uncharacterized protein LOC100501794 precursor [Zea mays]	RecName: Full=Protein NUCLEAR FUSION DEFECTIVE 4 {ECO:0000303|PubMed:16698901};	SubName: Full=Major facilitator superfamily protein {ECO:0000313|EMBL:ONM61306.1};	--	GO:0016021,integral component of membrane; GO:0000741,karyogamy; GO:0010197,polar nucleus fusion; GO:0009651,response to salt stress	PF06813.13:Nodulin-like
gene-LOC100502086	NC_050096.1	283082226	283085049	-	27.76	50.55	47.18	24.39	18.49	11	-1.443	6.34285e-07	7.48304e-05	down	K07375 tubulin beta | (RefSeq) uncharacterized protein LOC100502086 (A)	unknown [Zea mays]	RecName: Full=Tubulin beta-7 chain; AltName: Full=Beta-7-tubulin; AltName: Full=pTUB22;	RecName: Full=Tubulin beta chain {ECO:0000256|RuleBase:RU000352};	Beta tubulin	GO:0005737,cytoplasm; GO:0005874,microtubule; GO:0005525,GTP binding; GO:0003924,GTPase activity; GO:0005200,structural constituent of cytoskeleton; GO:0007017,microtubule-based process	PF00091.25:Tubulin/FtsZ family, GTPase domain
gene-LOC100502289	NC_050100.1	206751839	206753500	-	2.22	1.86	1.54	11.77	9.86	16.88	2.584	1.93846e-07	2.78893e-05	up	--	PLATZ transcription factor [Zea mays]	--	SubName: Full=PLATZ transcription factor {ECO:0000313|EMBL:AIB05208.1}; SubName: Full=PLATZ transcription factor family protein {ECO:0000313|EMBL:AQK73724.1};	--	--	PF04640.14:PLATZ transcription factor
gene-LOC100502408	NC_050105.1	2223477	2225447	-	0.78	1.34	0.58	5.59	4.3	6.33	2.424	5.1825e-07	6.38674e-05	up	K00521 ferric-chelate reductase [EC:1.16.1.7] | (RefSeq) ferric reduction oxidase 7, chloroplastic-like (A)	putative NAC domain transcription factor superfamily protein [Zea mays]	RecName: Full=NAC domain-containing protein 10 {ECO:0000303|PubMed:15029955}; Short=ONAC010 {ECO:0000303|PubMed:15029955}; AltName: Full=NAC transcription factor ONAC010 {ECO:0000305};	SubName: Full=NAC25 NAC type transcription factor {ECO:0000313|EMBL:AFT82714.1}; Flags: Fragment;	--	GO:0005634,nucleus; GO:0003677,DNA binding; GO:0048653,anther development; GO:0009555,pollen development; GO:0006355,regulation of transcription, DNA-templated; GO:0006351,transcription, DNA-templated	PF02365.15:No apical meristem (NAM) protein
gene-LOC100502433	NC_050097.1	6899884	6905592	+	1.83	2.05	2.36	4.81	6.32	5.2	1.178	7.77666e-06	0.000655328	up	K14431 transcription factor TGA | (RefSeq) putative bZIP transcription factor superfamily protein (A)	putative bZIP transcription factor superfamily protein isoform X2 [Zea mays]	RecName: Full=Transcription factor TGAL6 {ECO:0000305}; AltName: Full=bZIP transcription factor 37 {ECO:0000303|PubMed:18065552}; Short=OsbZIP37 {ECO:0000303|PubMed:18065552};	SubName: Full=BZIP transcription factor {ECO:0000313|EMBL:ADX60097.1}; SubName: Full=Transcription factor TGA4 {ECO:0000313|EMBL:ONM13220.1};	--	GO:0005634,nucleus; GO:0003700,DNA-binding transcription factor activity; GO:0043565,sequence-specific DNA binding; GO:0006952,defense response; GO:0006351,transcription, DNA-templated	PF14144.6:Seed dormancy control
gene-LOC100502471	NC_050105.1	16545051	16546962	+	0.19	0.11	0.03	1.3	0.54	1.19	2.992	0.00053393	0.0200608	up	--	uncharacterized LOC100502471 [Zea mays]	RecName: Full=Ureide permease 2 {ECO:0000303|PubMed:11971139}; Short=AtUPS2 {ECO:0000303|PubMed:11971139};	SubName: Full=Uncharacterized protein {ECO:0000313|EMBL:ACR38635.1};	--	GO:0016021,integral component of membrane; GO:0005886,plasma membrane; GO:0005274,allantoin:proton symporter activity; GO:0005524,ATP binding; GO:0015210,uracil transmembrane transporter activity; GO:0015720,allantoin transport; GO:0043100,pyrimidine nucleobase salvage; GO:0015857,uracil transport	PF07168.11:Ureide permease
gene-LOC100502520	NC_050097.1	63927483	63932321	-	4.16	5.31	3.06	12.7	11.01	19.12	1.608	0.000779845	0.0268387	up	K03549 KUP system potassium uptake protein | (RefSeq) uncharacterized protein LOC100502520 isoform X1 (A)	uncharacterized protein LOC100502520 [Zea mays]	RecName: Full=Potassium transporter 1; AltName: Full=OsHAK1;	RecName: Full=Potassium transporter {ECO:0000256|RuleBase:RU321113};	--	GO:0016021,integral component of membrane; GO:0016020,membrane; GO:0005886,plasma membrane; GO:0015079,potassium ion transmembrane transporter activity; GO:0006813,potassium ion transport	PF02705.16:K+ potassium transporter
gene-LOC100502521	NC_050097.1	20885110	20888273	+	0	0	0.16	0.55	0.67	1.14	3.832	0.000917364	0.0297654	up	K17912 9-cis-beta-carotene 9',10'-cleaving dioxygenase [EC:1.13.11.68] | (RefSeq) CCD7; carotenoid cleavage dioxygenase (A)	carotenoid cleavage dioxygenase7 [Zea mays]	RecName: Full=Carotenoid cleavage dioxygenase 7, chloroplastic; Short=OsCCD7; AltName: Full=Beta,beta-carotene 9',10'-oxygenase; EC=1.13.11.68; AltName: Full=Protein DWARF-17; AltName: Full=Protein HIGH-TILLERING DWARF 1; AltName: Full=Protein MAX3 homolog; Flags: Precursor;	SubName: Full=Carotenoid cleavage dioxygenase7 {ECO:0000313|EMBL:ONM15226.1};	Beta, beta-carotene 15,15'-dioxygenase and related enzymes	GO:0009507,chloroplast; GO:0102395,9-cis-beta-carotene 9',10'-cleavage oxygenase activity; GO:0045549,9-cis-epoxycarotenoid dioxygenase activity; GO:0046872,metal ion binding; GO:0016702,oxidoreductase activity, acting on single donors with incorporation of molecular oxygen, incorporation of two atoms of oxygen; GO:0016121,carotene catabolic process; GO:0009733,response to auxin; GO:0010223,secon…	PF03055.15:Retinal pigment epithelial membrane protein
gene-LOC100502538	--	--	--	--	0.88	0.67	0.57	3.4	3.66	3.72	2.13	5.0205e-06	0.000458436	up	--
gene-LOC100856957	NC_050098.1	212410269	212411759	+	0.75	0.72	1.08	4.31	2.41	4.05	1.9	6.3271e-05	0.00370997	up	K00799 glutathione S-transferase [EC:2.5.1.18] | (RefSeq) glutathione S-transferase GSTU6 (A)	Glutathione S-transferase GSTU6 [Zea mays]	RecName: Full=Probable glutathione S-transferase GSTU6; EC=2.5.1.18; AltName: Full=28 kDa cold-induced protein;	SubName: Full=Glutathione S-transferase GSTU6 {ECO:0000313|EMBL:ONM39049.1};	Glutathione S-transferase	GO:0005737,cytoplasm; GO:0004364,glutathione transferase activity; GO:0006749,glutathione metabolic process; GO:0009407,toxin catabolic process	PF13417.6:Glutathione S-transferase, N-terminal domain
gene-LOC100856995	NC_050098.1	196374823	196375378	-	3.97	5.12	7.49	2.66	2.53	1.68	-1.487	4.29837e-05	0.00269736	down	--	--	--	--	--	--	--
gene-LOC100857065	NC_050103.1	163928199	163931518	+	0.87	1.57	2.34	4.32	4.07	3.14	1.092	0.000838444	0.028129	up	--	protein LATERAL ROOT PRIMORDIUM 1 [Zea mays]	RecName: Full=Protein LATERAL ROOT PRIMORDIUM 1;	SubName: Full=Protein SHI RELATED SEQUENCE 6 {ECO:0000313|EMBL:AQK98120.1};	--	GO:0005634,nucleus; GO:0003677,DNA binding; GO:0046872,metal ion binding; GO:0042803,protein homodimerization activity; GO:0009851,auxin biosynthetic process; GO:0009734,auxin-activated signaling pathway; GO:0009733,response to auxin; GO:0048364,root development	PF05142.12:Domain of unknown function (DUF702)
gene-LOC101027224	NC_050100.1	211758288	211763308	+	32.09	37.83	43.2	22.68	22.53	15.52	-1.131	7.6923e-11	2.73346e-08	down	K22683 aspartyl protease family protein [EC:3.4.23.-] | (RefSeq) protein ASPARTIC PROTEASE IN GUARD CELL 1-like (A)	aspartic proteinase nepenthesin-1 precursor [Zea mays]	RecName: Full=Aspartyl protease family protein At5g10770; EC=3.4.23.- {ECO:0000305}; Flags: Precursor;	SubName: Full=Aspartyl protease AED1 {ECO:0000313|EMBL:AQK74332.1};	Aspartyl protease	GO:0031225,anchored component of membrane; GO:0005886,plasma membrane; GO:0004190,aspartic-type endopeptidase activity; GO:0030163,protein catabolic process; GO:0006508,proteolysis	PF14543.6:Xylanase inhibitor N-terminal
gene-LOC103625885	NC_050100.1	7796811	7806348	-	5.15	12.02	9.84	4.77	4.44	3.92	-1.205	2.73812e-05	0.00186079	down	K10357 myosin V | (RefSeq) myosin-12 isoform X1 (A)	myosin-12 isoform X1 [Zea mays]	RecName: Full=Myosin-12; AltName: Full=Myosin XI F; Short=AtXIF;	SubName: Full=Myosin-12 {ECO:0000313|EMBL:AQK62950.1};	Myosin class V heavy chain	GO:0016461,unconventional myosin complex; GO:0003779,actin binding; GO:0005524,ATP binding; GO:0005516,calmodulin binding; GO:0003774,motor activity; GO:0030048,actin filament-based movement	PF00063.21:Myosin head (motor domain)
gene-LOC103626188	NC_050100.1	31914685	31917752	-	0.25	0.74	0.39	1.71	1.83	1.03	1.511	0.000526917	0.0198787	up	K22377 E3 ubiquitin-protein ligase listerin [EC:2.3.2.27] | (RefSeq) hypothetical protein (A)	uncharacterized protein LOC103626188 [Zea mays]	RecName: Full=Zinc finger protein CONSTANS-LIKE 4;	SubName: Full=CCT motif family protein {ECO:0000313|EMBL:AQK65167.1};	--	GO:0005634,nucleus; GO:0008270,zinc ion binding; GO:0009909,regulation of flower development; GO:0009416,response to light stimulus	PF06203.14:CCT motif
gene-LOC103626199	NC_050100.1	33656360	33658743	+	3.04	3.52	3.15	10.11	10.95	18.82	1.894	4.93237e-05	0.00299949	up	K00927 phosphoglycerate kinase [EC:2.7.2.3] | (RefSeq) uncharacterized LOC109182250 (A)	UDP-glycosyltransferase 86A1 [Zea mays]	RecName: Full=UDP-glycosyltransferase 86A1; EC=2.4.1.-;	RecName: Full=Glycosyltransferase {ECO:0000256|RuleBase:RU362057}; EC=2.4.1.- {ECO:0000256|RuleBase:RU362057};	UDP-glucuronosyl and UDP-glucosyl transferase	GO:0043231,intracellular membrane-bounded organelle; GO:0080043,quercetin 3-O-glucosyltransferase activity; GO:0080044,quercetin 7-O-glucosyltransferase activity; GO:0008152,metabolic process	PF00201.18:UDP-glucoronosyl and UDP-glucosyl transferase
gene-LOC103626249	NC_050100.1	38261051	38262391	+	0.05	0.1	0.47	3.11	1.56	2.51	3.365	1.56135e-05	0.00116879	up	K13464 jasmonate ZIM domain-containing protein | (RefSeq) protein TIFY 10B-like (A)	protein TIFY 10b [Zea mays]	RecName: Full=Protein TIFY 11d {ECO:0000305};	SubName: Full=ZIM transcription factor {ECO:0000313|EMBL:AIB05502.1}; Flags: Fragment;	--	GO:0006355,regulation of transcription, DNA-templated; GO:0006351,transcription, DNA-templated	PF09425.10:Divergent CCT motif
gene-LOC103626387	NC_050100.1	56596053	56597687	+	0	0.04	0	0.47	0.35	0.48	4.705	0.000867726	0.0288206	up	K09338 homeobox-leucine zipper protein | (RefSeq) homeobox-leucine zipper protein HAT22 (A)	homeobox-leucine zipper protein HOX18 [Zea mays]	RecName: Full=Homeobox-leucine zipper protein HOX18; AltName: Full=HD-ZIP protein HOX18; AltName: Full=Homeodomain transcription factor HOX18; AltName: Full=OsHox18;	SubName: Full=Homeobox-leucine zipper protein HAT9 {ECO:0000313|EMBL:AQK66672.1};	Transcription factor HEX, contains HOX and HALZ domains	GO:0005634,nucleus; GO:0003700,DNA-binding transcription factor activity; GO:0043565,sequence-specific DNA binding; GO:0006351,transcription, DNA-templated	PF00046.29:Homeodomain
gene-LOC103626417	NC_050100.1	59947730	59951659	+	133.34	90.39	57.67	30.77	28	38.89	-1.789	0.000818725	0.0277877	down	K00975 glucose-1-phosphate adenylyltransferase [EC:2.7.7.27] | (RefSeq) putative two-component response regulator ARR21 (A)	protein PHOSPHATE STARVATION RESPONSE 3, partial [Zea mays]	RecName: Full=Protein PHOSPHATE STARVATION RESPONSE 3 {ECO:0000303|PubMed:26082401}; Short=OsPHR3 {ECO:0000303|PubMed:26082401};	SubName: Full=Myb family transcription factor PHL6 {ECO:0000313|EMBL:AQK66919.1};	--	GO:0005634,nucleus; GO:0003677,DNA binding; GO:0006355,regulation of transcription, DNA-templated; GO:0006351,transcription, DNA-templated	PF00249.31:Myb-like DNA-binding domain
gene-LOC103626437	NC_050100.1	61304379	61306224	-	1.1	1.9	2.36	12.64	7.38	13.74	2.535	2.03477e-08	3.94996e-06	up	K19861 benzyl alcohol O-benzoyltransferase [EC:2.3.1.196 2.3.1.232] | (RefSeq) benzyl alcohol O-benzoyltransferase (A)	benzyl alcohol O-benzoyltransferase [Zea mays]	RecName: Full=Benzyl alcohol O-benzoyltransferase; EC=2.3.1.196; AltName: Full=Benzoyl coenzyme A:benzyl alcohol benzoyl transferase;	SubName: Full=(Z)-3-hexen-1-ol acetyltransferase {ECO:0000313|EMBL:AQK67092.1};	--	GO:0016747,transferase activity, transferring acyl groups other than amino-acyl groups	PF02458.15:Transferase family
gene-LOC103626528	NC_050100.1	72040156	72048051	+	1.47	1.73	2.17	8.66	12.05	10.39	2.341	2.17946e-15	2.29575e-12	up	K05387 glutamate receptor, ionotropic, plant | (RefSeq) LOW QUALITY PROTEIN: glutamate receptor 3.1-like (A)	glutamate receptor 3.1-like [Zea mays]	RecName: Full=Glutamate receptor 3.1; AltName: Full=Ligand-gated ion channel 3.1; Flags: Precursor;	RecName: Full=Glutamate receptor {ECO:0000256|PIRNR:PIRNR037090};	Glutamate-gated kainate-type ion channel receptor subunit GluR5 and related subunits	GO:0016021,integral component of membrane; GO:0004970,ionotropic glutamate receptor activity	PF01094.28:Receptor family ligand binding region
gene-LOC103626569	NC_050100.1	76661249	76665131	+	0.34	0.19	0.38	15.15	11.29	31.68	5.874	1.18703e-18	2.69309e-15	up	K21398 natural resistance-associated macrophage protein 2 | (RefSeq) metal transporter Nramp6 (A)	metal transporter NRAT1-like [Zea mays]	RecName: Full=Metal transporter NRAT1; AltName: Full=Protein NRAMP ALUMINUM TRANSPORTER 1;	SubName: Full=Metal transporter Nramp6 {ECO:0000313|EMBL:AQK68138.1};	Mn2+ and Fe2+ transporters of the NRAMP family	GO:0016021,integral component of membrane; GO:0005886,plasma membrane; GO:0015083,aluminum ion transmembrane transporter activity; GO:0046873,metal ion transmembrane transporter activity; GO:0015690,aluminum cation transport; GO:0010044,response to aluminum ion	PF01566.18:Natural resistance-associated macrophage protein
gene-LOC103626654	NC_050100.1	85072163	85073602	+	0.12	0.43	0.31	4.49	1.72	3.71	3.394	1.05205e-06	0.000116214	up	--	--	--	--	--	--	--
gene-LOC103626680	NC_050100.1	89056859	89058723	+	9.55	8.09	6.86	3.51	4.75	3.62	-1.309	0.000596836	0.0217591	down	--	uncharacterized protein LOC103626680 [Zea mays]	RecName: Full=Protein MARD1 {ECO:0000303|PubMed:15159630}; AltName: Full=Mediator of ABA-regulated dormancy1 {ECO:0000303|PubMed:15159630}; AltName: Full=Senescence-associated protein SAG102 {ECO:0000303|PubMed:11402199};	SubName: Full=DUF581 domain containing protein expressed {ECO:0000313|EMBL:AQK68809.1};	--	GO:0010494,cytoplasmic stress granule; GO:0000932,P-body; GO:0046872,metal ion binding; GO:0009737,response to abscisic acid; GO:0010162,seed dormancy process	PF04570.14:zinc-finger of the FCS-type, C2-C2
gene-LOC103626750	NC_050100.1	101117465	101154309	+	0.18	0.22	0.11	0.74	0.69	1.11	2.137	0.000458747	0.01785	up	K07195 exocyst complex component 7 | (RefSeq) exocyst complex component EXO70B1 (A)	uncharacterized protein LOC103626750 [Zea mays]	RecName: Full=Exocyst complex component EXO70B2 {ECO:0000303|PubMed:16942608}; Short=AtExo70b2 {ECO:0000303|PubMed:16942608}; AltName: Full=Exocyst subunit Exo70 family protein B2 {ECO:0000303|PubMed:16942608};	SubName: Full=Leucine zipper protein-like {ECO:0000313|EMBL:AQK69211.1};	Exocyst component protein and related proteins	GO:0005737,cytoplasm; GO:0005829,cytosol; GO:0000145,exocyst; GO:0070062,extracellular exosome; GO:0005634,nucleus; GO:0045335,phagocytic vesicle; GO:0005886,plasma membrane; GO:0043621,protein self-association; GO:0042545,cell wall modification; GO:0006952,defense response; GO:0006887,exocytosis; GO:1900426,positive regulation of defense response to bacterium; GO:1902290,positive regulation of d…	PF03081.15:Exo70 exocyst complex subunit
gene-LOC103626973	NC_050100.1	143261361	143262439	+	0.87	0.72	0.44	6.28	3.82	8.46	3.01	9.43918e-07	0.000106259	up	--	uncharacterized protein LOC103626973 [Zea mays]	--	SubName: Full=Uncharacterized protein {ECO:0000313|EMBL:AQK70049.1, ECO:0000313|EnsemblPlants:Zm00001d016087_P001};	--	GO:0016021,integral component of membrane	--
gene-LOC103626989	NC_050100.1	145627596	145630787	-	2.47	1.48	1.7	5.13	6.65	16.28	2.155	0.00144729	0.0416046	up	--	--	--	--	--	--	--
gene-LOC103626996	NC_050100.1	147071516	147075884	+	7.38	7.23	7.53	3.97	3.32	2.17	-1.496	1.47559e-07	2.23185e-05	down	K21867 potassium channel | (RefSeq) potassium channel KAT1 (A)	potassium channel KAT1 [Zea mays]	RecName: Full=Potassium channel KAT1;	SubName: Full=Uncharacterized protein {ECO:0000313|EMBL:EES06576.1};	K+-channel ERG and related proteins, contain PAS/PAC sensor domain	GO:0005887,integral component of plasma membrane; GO:0005249,voltage-gated potassium channel activity; GO:0034765,regulation of ion transmembrane transport; GO:0042391,regulation of membrane potential	PF00520.31:Ion transport protein
gene-LOC103627029	NC_050100.1	150347152	150350052	-	0	0	0	0.49	0.21	0.78	6.938	3.26024e-06	0.0003122	up	--	uncharacterized protein LOC103627029 [Zea mays]	--	SubName: Full=Uncharacterized protein 9C20.4a {ECO:0000313|EMBL:AAQ06286.1};	--	GO:0008270,zinc ion binding; GO:0006355,regulation of transcription, DNA-templated	--
gene-LOC103627122	NC_050100.1	160334102	160349648	-	0.49	0.46	0.35	2.51	2.7	3.88	2.619	4.13702e-08	7.36865e-06	up	K05643 ATP-binding cassette, subfamily A (ABC1), member 3 | (RefSeq) ABC transporter A family member 1 isoform X2 (A)	ABC transporter A family member 10 isoform X2 [Zea mays]	RecName: Full=ABC transporter A family member 8; Short=ABC transporter ABCA.8; Short=AtABCA8; AltName: Full=ABC2 homolog 7;	SubName: Full=Uncharacterized protein {ECO:0000313|EMBL:EES04733.2};	Lipid exporter ABCA1 and related proteins, ABC superfamily	GO:0016021,integral component of membrane; GO:0043231,intracellular membrane-bounded organelle; GO:0005524,ATP binding; GO:0042626,ATPase activity, coupled to transmembrane movement of substances; GO:0005215,transporter activity; GO:0006869,lipid transport	PF00005.27:ABC transporter
gene-LOC103627147	NC_050100.1	162419443	162420956	+	0.16	0.24	0.17	1.95	1.32	3.31	3.445	1.11899e-06	0.000122235	up	K13425 WRKY transcription factor 22 | (RefSeq) WRKY transcription factor 22-like (A)	WRKY transcription factor WRKY51 isoform X2 [Zea mays]	RecName: Full=WRKY transcription factor WRKY51 {ECO:0000303|PubMed:15047897}; Short=OsWRKY51 {ECO:0000303|PubMed:15047897};	SubName: Full=Putative WRKY transcription factor 11 {ECO:0000313|EMBL:AQK70850.1};	--	GO:0005634,nucleus; GO:0003700,DNA-binding transcription factor activity; GO:0043565,sequence-specific DNA binding; GO:0006351,transcription, DNA-templated	PF03106.15:WRKY DNA -binding domain
gene-LOC103627257	NC_050100.1	173753122	173755716	-	0.76	0.97	1.02	2.3	3.56	2.08	1.299	2.16387e-05	0.00153786	up	K19040 E3 ubiquitin-protein ligase ATL10/75/76/77/78 [EC:2.3.2.27] | (RefSeq) RING-H2 finger protein ATL72 (A)	RING-H2 finger protein ATL72 [Zea mays]	RecName: Full=RING-H2 finger protein ATL78; EC=2.3.2.27 {ECO:0000305}; AltName: Full=RING-type E3 ubiquitin transferase ATL78 {ECO:0000305};	SubName: Full=RING-H2 finger protein ATL79 {ECO:0000313|EMBL:AQK71548.1};	FOG: Predicted E3 ubiquitin ligase	GO:0016021,integral component of membrane; GO:0046872,metal ion binding; GO:0061630,ubiquitin protein ligase activity; GO:0043161,proteasome-mediated ubiquitin-dependent protein catabolic process	PF13639.6:Ring finger domain
gene-LOC103627266	NC_050100.1	174500244	174500949	-	1.84	1.4	0.79	7.84	7.31	14.48	2.691	2.91498e-05	0.00196277	up	--	abscisic stress-ripening protein 3 [Zea mays]	RecName: Full=Abscisic stress-ripening protein 3;	SubName: Full=Abscisic acid stress ripening6 {ECO:0000313|EMBL:AQK71596.1};	--	GO:0006950,response to stress	PF02496.16:ABA/WDS induced protein
gene-LOC103627282	NC_050100.1	176150777	176168687	+	0.11	0.37	0.11	1.14	0.82	2.55	2.911	0.00019044	0.00887334	up	K04421 mitogen-activated protein kinase kinase kinase 3 [EC:2.7.11.25] | (RefSeq) mitogen-activated protein kinase kinase kinase 3 isoform X1 (A)	mitogen-activated protein kinase kinase kinase 3 isoform X2 [Zea mays]	RecName: Full=Mitogen-activated protein kinase kinase kinase 3 {ECO:0000303|PubMed:27679653}; EC=2.7.11.25 {ECO:0000250|UniProtKB:Q9C5H5}; AltName: Full=MAP3K alpha protein kinase {ECO:0000303|PubMed:10095117}; Short=AtMAP3Kalpha {ECO:0000303|PubMed:10095117};	SubName: Full=Mitogen-activated protein kinase kinase kinase 3 {ECO:0000313|EMBL:AQK71685.1};	MEKK and related serine/threonine protein kinases	GO:0005737,cytoplasm; GO:0005524,ATP binding; GO:0004709,MAP kinase kinase kinase activity; GO:0004674,protein serine/threonine kinase activity; GO:0032147,activation of protein kinase activity; GO:0007346,regulation of mitotic cell cycle; GO:0023014,signal transduction by protein phosphorylation; GO:0031098,stress-activated protein kinase signaling cascade	PF00069.25:Protein kinase domain
gene-LOC103627351	NC_050100.1	181963795	181964802	-	0	0.13	0	2.26	1.69	2.67	5.571	2.8938e-06	0.000281682	up	K10523 speckle-type POZ protein | (RefSeq) BTB/POZ domain-containing protein At1g55760 (A)	heavy metal-associated isoprenylated plant protein 47 [Zea mays]	RecName: Full=Heavy metal-associated isoprenylated plant protein 47 {ECO:0000303|PubMed:21072340, ECO:0000303|PubMed:23368984}; Short=AtHIP47 {ECO:0000303|PubMed:21072340, ECO:0000303|PubMed:23368984}; Flags: Precursor;	SubName: Full=Copper transport protein family {ECO:0000313|EMBL:AQK72132.1};	--	GO:0005737,cytoplasm; GO:0046914,transition metal ion binding; GO:0046916,cellular transition metal ion homeostasis; GO:0030001,metal ion transport	PF00403.26:Heavy-metal-associated domain
gene-LOC103627394	NC_050100.1	186309605	186312622	+	0.03	0.06	0	0.46	0.61	0.31	3.868	0.000175237	0.00829605	up	K02218 casein kinase 1 [EC:2.7.11.1] | (RefSeq) uncharacterized protein LOC8069780 (A)	protein ANTAGONIST OF LIKE HETEROCHROMATIN PROTEIN 1-like isoform X1 [Zea mays]	RecName: Full=Protein ALP1-like {ECO:0000305}; EC=3.1.-.-;	SubName: Full=Putative PIFa transposase {ECO:0000313|EMBL:AEJ07903.1};	Predicted transposase	GO:0005634,nucleus; GO:0046872,metal ion binding; GO:0004518,nuclease activity	PF13359.6:DDE superfamily endonuclease
gene-LOC103627487	NC_050100.1	194703356	194704199	-	4.35	4.14	1.9	41.56	34.23	70.31	3.628	1.61966e-09	4.22746e-07	up	K23490 cytochrome b5 | (RefSeq) cytochrome b5 isoform A-like (A)	cytochrome b5 isoform A-like [Zea mays]	RecName: Full=Cytochrome b5 isoform E {ECO:0000303|PubMed:19054355}; Short=AtCb5-E {ECO:0000303|PubMed:19054355}; AltName: Full=Cytochrome b5 isoform 1; AltName: Full=Cytochrome b5 isoform A {ECO:0000303|PubMed:22384013}; Short=AtCb5-A {ECO:0000303|PubMed:22384013};	SubName: Full=Cytochrome b5 {ECO:0000313|EMBL:ACG25926.1};	Cytochrome b5	GO:0009535,chloroplast thylakoid membrane; GO:0005783,endoplasmic reticulum; GO:0005789,endoplasmic reticulum membrane; GO:0016021,integral component of membrane; GO:0005886,plasma membrane; GO:0005774,vacuolar membrane; GO:0005773,vacuole; GO:0020037,heme binding; GO:0046872,metal ion binding; GO:0055114,oxidation-reduction process	PF00173.28:Cytochrome b5-like Heme/Steroid binding domain
gene-LOC103627537	NC_050100.1	190771593	190772806	-	0.45	0.14	0.19	2.06	1.78	1.84	2.585	5.57267e-05	0.00332041	up	--	uncharacterized protein LOC103627537 [Zea mays]	--	SubName: Full=Uncharacterized protein {ECO:0000313|EMBL:AQK72786.1, ECO:0000313|EnsemblPlants:Zm00001d017287_P001};	--	--	PF04520.13:Senescence regulator
gene-LOC103627695	NC_050100.1	213565302	213571171	-	0.12	0.52	0.39	4.17	2.99	5.61	3.562	4.46773e-10	1.29187e-07	up	--	MACPF domain-containing protein At1g14780 [Zea mays]	RecName: Full=MACPF domain-containing protein At1g14780;	SubName: Full=MACPF domain-containing protein {ECO:0000313|EMBL:AQK74662.1};	--	GO:0009626,plant-type hypersensitive response	PF01823.19:MAC/Perforin domain
gene-LOC103627767	NC_050100.1	217266519	217268614	+	4.81	7.16	3.79	2.6	1.92	2.3	-1.414	0.000381462	0.0152865	down	K10664 E3 ubiquitin-protein ligase ATL6/9/15/31/42/55 [EC:2.3.2.27] | (RefSeq) E3 ubiquitin-protein ligase ATL31 (A)	E3 ubiquitin-protein ligase ATL31 [Zea mays]	RecName: Full=E3 ubiquitin-protein ligase ATL31; EC=2.3.2.27 {ECO:0000269|PubMed:19702666}; AltName: Full=Protein CARBON/NITROGEN INSENSITIVE 1; AltName: Full=Protein SUPER SURVIVAL 1; AltName: Full=RING-H2 finger protein ATL31; AltName: Full=RING-type E3 ubiquitin transferase ATL31 {ECO:0000305}; Flags: Precursor;	SubName: Full=E3 ubiquitin-protein ligase ATL6 {ECO:0000313|EMBL:AQK75076.1};	FOG: Predicted E3 ubiquitin ligase	GO:0016021,integral component of membrane; GO:0016020,membrane; GO:0046872,metal ion binding; GO:0061630,ubiquitin protein ligase activity; GO:0004842,ubiquitin-protein transferase activity; GO:0043562,cellular response to nitrogen levels; GO:0009816,defense response to bacterium, incompatible interaction; GO:0009814,defense response, incompatible interaction; GO:0043161,proteasome-mediated ubiqu…	PF13639.6:Ring finger domain
gene-LOC103627840	NC_050100.1	221124606	221128989	+	1.58	1.72	0.74	5.35	3.81	7.55	1.861	0.00118869	0.0359511	up	K05387 glutamate receptor, ionotropic, plant | (RefSeq) glutamate receptor 2.8 (A)	glutamate receptor 2.8 [Zea mays]	RecName: Full=Glutamate receptor 2.8; AltName: Full=Ligand-gated ion channel 2.8; Flags: Precursor;	SubName: Full=Glutamate receptor 2.7 {ECO:0000313|EMBL:AQK75634.1};	Glutamate-gated kainate-type ion channel receptor subunit GluR5 and related subunits	GO:0016021,integral component of membrane; GO:0005622,intracellular; GO:0005886,plasma membrane; GO:0005262,calcium channel activity; GO:0008066,glutamate receptor activity; GO:0004970,ionotropic glutamate receptor activity; GO:0006816,calcium ion transport; GO:0019722,calcium-mediated signaling; GO:0071230,cellular response to amino acid stimulus	PF01094.28:Receptor family ligand binding region
gene-LOC103627883	NC_050100.1	223477183	223482074	-	14.39	18.43	24.22	10.07	16	6.19	-1.077	0.000837693	0.028129	down	--	phosphate transporter PHO1-2 isoform X1 [Zea mays]	RecName: Full=Phosphate transporter PHO1-2; AltName: Full=Protein PHO1-2; Short=OsPHO1;2;	SubName: Full=PHO1-2b {ECO:0000313|EMBL:ASW20331.1}; SubName: Full=Phosphate transporter3 {ECO:0000313|EMBL:AQK76013.1};	Predicted small molecule transporter	GO:0016021,integral component of membrane; GO:0005886,plasma membrane; GO:0005802,trans-Golgi network; GO:0000822,inositol hexakisphosphate binding; GO:0015114,phosphate ion transmembrane transporter activity; GO:0016036,cellular response to phosphate starvation; GO:0048016,inositol phosphate-mediated signaling; GO:0006817,phosphate ion transport; GO:0006799,polyphosphate biosynthetic process	PF03124.14:EXS family
gene-LOC103627891	NC_050100.1	224033166	224042210	+	8.15	5.68	4.98	3.53	2.4	2.07	-1.539	0.000369431	0.014926	down	K16578 CLIP-associating protein 1/2 | (RefSeq) CLIP-associated protein isoform X1 (A)	CLIP-associated protein isoform X4 [Zea mays]	RecName: Full=CLIP-associated protein; Short=AtCLASP;	SubName: Full=CLIP-associated protein {ECO:0000313|EMBL:AQK76112.1};	CLIP-associating protein	GO:0005938,cell cortex; GO:0009524,phragmoplast; GO:0005886,plasma membrane; GO:0009506,plasmodesma; GO:0005876,spindle microtubule; GO:0051010,microtubule plus-end binding; GO:0051301,cell division; GO:0043622,cortical microtubule organization; GO:0000278,mitotic cell cycle; GO:0007026,negative regulation of microtubule depolymerization; GO:0051781,positive regulation of cell division; GO:005082…	PF12348.8:CLASP N terminal
gene-LOC103628237	NC_050100.1	63899337	63902548	-	0.05	0.19	0.12	0.7	0.46	0.54	2.065	0.00104511	0.0326186	up	--	putative UPF0496 protein 2 isoform X2 [Zea mays]	RecName: Full=Putative UPF0496 protein 2;	SubName: Full=UPF0496 protein {ECO:0000313|EMBL:AQK67218.1};	--	GO:0016021,integral component of membrane	PF05055.12:Protein of unknown function (DUF677)
gene-LOC103628663	NC_050100.1	169584267	169586979	+	0.2	0.28	0.27	1.52	0.91	2.49	2.588	0.000183746	0.00861899	up	K09286 EREBP-like factor | (RefSeq) ethylene-responsive transcription factor ERF071-like (A)	ethylene-responsive transcription factor ABI4 isoform X2 [Zea mays]	RecName: Full=Ethylene-responsive transcription factor ERF113; AltName: Full=Protein RELATED TO AP2 6L {ECO:0000305};	SubName: Full=Ethylene-responsive transcription factor ERF115 {ECO:0000313|EMBL:AQK71305.1};	--	GO:0005634,nucleus; GO:0003700,DNA-binding transcription factor activity; GO:0043565,sequence-specific DNA binding; GO:0071497,cellular response to freezing; GO:0009873,ethylene-activated signaling pathway; GO:0019760,glucosinolate metabolic process; GO:0045893,positive regulation of transcription, DNA-templated; GO:0009737,response to abscisic acid; GO:0009723,response to ethylene; GO:0009753,re…	PF00847.20:AP2 domain
gene-LOC103628699	NC_050100.1	177400678	177401764	+	0.15	0.05	0.22	1.17	0.74	1.24	2.706	0.000587425	0.0216029	up	K16286 E3 ubiquitin-protein ligase EL5 [EC:2.3.2.27] | (RefSeq) E3 ubiquitin-protein ligase EL5 (A)	E3 ubiquitin-protein ligase EL5 [Zea mays]	RecName: Full=E3 ubiquitin-protein ligase EL5; EC=2.3.2.27 {ECO:0000269|PubMed:12028574, ECO:0000269|PubMed:16186120}; AltName: Full=Protein ELICITOR 5; AltName: Full=RING-type E3 ubiquitin transferase EL5 {ECO:0000305};	SubName: Full=RING-H2 finger protein ATL3 {ECO:0000313|EMBL:AQK71790.1};	FOG: Predicted E3 ubiquitin ligase	GO:0016021,integral component of membrane; GO:0005886,plasma membrane; GO:0046872,metal ion binding; GO:0061630,ubiquitin protein ligase activity; GO:0004842,ubiquitin-protein transferase activity; GO:0051301,cell division; GO:0043161,proteasome-mediated ubiquitin-dependent protein catabolic process; GO:0000209,protein polyubiquitination; GO:0016567,protein ubiquitination; GO:0042787,NA; GO:00483…	PF13639.6:Ring finger domain
gene-LOC103628745	--	--	--	--	0.89	0.45	0.31	0.03	0.08	0.11	-3.191	0.000642556	0.0230996	down	--
gene-LOC103628972	--	--	--	--	0.32	0.2	0.39	1.32	1.3	3.11	2.525	0.00118859	0.0359511	up	--
gene-LOC103629174	NC_050101.1	33464824	33469920	-	0.41	0.77	0.43	2.72	1.69	3.05	2.071	2.10375e-05	0.00150353	up	--	trihelix transcription factor GT-3b [Zea mays]	RecName: Full=Trihelix transcription factor GT-3b; AltName: Full=Transcription factor GT-1-like; AltName: Full=Trihelix DNA-binding protein GT-3b;	SubName: Full=Trihelix transcription factor GT-3b {ECO:0000313|EMBL:AQK79005.1};	Transcription factor GT-2 and related proteins, contains trihelix DNA-binding/SANT domain	GO:0016592,mediator complex; GO:0005730,nucleolus; GO:0005634,nucleus; GO:0003700,DNA-binding transcription factor activity; GO:0000981,DNA-binding transcription factor activity, RNA polymerase II-specific; GO:0043565,sequence-specific DNA binding; GO:0006355,regulation of transcription, DNA-templated; GO:0006351,transcription, DNA-templated	PF13837.6:Myb/SANT-like DNA-binding domain
gene-LOC103629177	NC_050101.1	34319891	34324673	+	0.45	0.32	0.97	1.83	2.07	1.81	1.512	0.00175226	0.0473271	up	K05278 flavonol synthase [EC:1.14.11.23] | (RefSeq) flavonol synthase/flavanone 3-hydroxylase (A)	probable 2-oxoglutarate-dependent dioxygenase ANS [Zea mays]	RecName: Full=Probable 2-oxoglutarate-dependent dioxygenase At5g05600 {ECO:0000305}; EC=1.14.11.- {ECO:0000305};	SubName: Full=Jasmonate-regulated gene 21 {ECO:0000313|EMBL:AQK79009.1};	Iron/ascorbate family oxidoreductases	GO:0005829,cytosol; GO:0051213,dioxygenase activity; GO:0120091,jasmonic acid hydrolase; GO:0046872,metal ion binding; GO:0097237,cellular response to toxic substance; GO:0009813,flavonoid biosynthetic process; GO:2000022,regulation of jasmonic acid mediated signaling pathway; GO:0080167,response to karrikin	PF03171.20:2OG-Fe(II) oxygenase superfamily
gene-LOC103629226	NC_050101.1	42758157	42759948	-	370.36	282.1	157.32	42.25	56.99	110.62	-2.144	0.000889917	0.0292318	down	K09422 transcription factor MYB, plant | (RefSeq) uncharacterized protein LOC103629226 (A)	uncharacterized protein LOC103629226 [Zea mays]	RecName: Full=Transcription factor MYB59; AltName: Full=Myb-related protein 59; Short=AtMYB59;	SubName: Full=MYB transcription factor {ECO:0000313|EMBL:AIB05685.1}; Flags: Fragment;	Transcription factor, Myb superfamily	GO:0005634,nucleus; GO:0003700,DNA-binding transcription factor activity; GO:0000981,DNA-binding transcription factor activity, RNA polymerase II-specific; GO:0043565,sequence-specific DNA binding; GO:0001135,RNA polymerase II transcription regulator recruiting activity; GO:0044212,transcription regulatory region DNA binding; GO:0030154,cell differentiation; GO:0006357,regulation of transcription…	PF00249.31:Myb-like DNA-binding domain
gene-LOC103629258	NC_050101.1	47240923	47247654	+	12.75	18.6	26.63	12.92	12.88	5.67	-1.118	0.000755067	0.0261078	down	K15803 (-)-germacrene D synthase [EC:4.2.3.75] | (RefSeq) beta-sesquiphellandrene synthase-like (A)	alpha-humulene synthase isoform X2 [Zea mays]	RecName: Full=Alpha-humulene synthase; EC=4.2.3.104;	SubName: Full=Alpha-humulene/(-)-(E)-beta-caryophyllene synthase {ECO:0000313|EMBL:AQK79452.1};	--	GO:0000287,magnesium ion binding; GO:0010333,terpene synthase activity; GO:0008152,metabolic process	PF03936.16:Terpene synthase family, metal binding domain
gene-LOC103629456	NC_050101.1	78714282	78718367	+	2.1	1.68	0.93	5.57	5.41	11.36	2.054	0.000946639	0.0304141	up	K20606 mitogen-activated protein kinase kinase kinase ANP1 [EC:2.7.11.25] | (RefSeq) receptor-like serine/threonine-protein kinase SD1-7 isoform X1 (A)	cysteine-rich receptor-like protein kinase 10 isoform X1 [Zea mays]	RecName: Full=G-type lectin S-receptor-like serine/threonine-protein kinase RKS1; EC=2.7.11.1; AltName: Full=Receptor-like protein kinase 1; Flags: Precursor;	SubName: Full=Uncharacterized protein {ECO:0000313|EMBL:KXG19247.1};	--	GO:0016021,integral component of membrane; GO:0005886,plasma membrane; GO:0005524,ATP binding; GO:0005516,calmodulin binding; GO:0030246,carbohydrate binding; GO:0004674,protein serine/threonine kinase activity; GO:0006468,protein phosphorylation; GO:0048544,recognition of pollen	PF07714.17:Protein tyrosine kinase
gene-LOC103629515	NC_050101.1	86593019	86594925	-	0.06	0.26	0.07	0.85	0.55	2.23	3.195	0.000479329	0.018408	up	K16818 phospholipase A1 [EC:3.1.1.32] | (RefSeq) phospholipase A(1) DAD1, chloroplastic-like (A)	phospholipase A1-Igamma1, chloroplastic [Zea mays]	RecName: Full=Phospholipase A1-Igamma1, chloroplastic; EC=3.1.1.-; Flags: Precursor;	SubName: Full=Phospholipase A1-Igamma1 chloroplastic {ECO:0000313|EMBL:AQK80510.1};	Predicted lipase	GO:0009507,chloroplast; GO:0047714,galactolipase activity; GO:0008970,phospholipase A1 activity; GO:0004806,triglyceride lipase activity; GO:0016042,lipid catabolic process	PF01764.25:Lipase (class 3)
gene-LOC103629860	NC_050101.1	118587679	118590940	+	1.9	1.61	0.96	0.48	0.22	0.57	-2.019	0.00113722	0.0349023	down	K13420 LRR receptor-like serine/threonine-protein kinase FLS2 [EC:2.7.11.1] | (RefSeq) LRR receptor-like serine/threonine-protein kinase EFR (A)	putative leucine-rich repeat receptor-like serine/threonine-protein kinase At2g24130 [Zea mays]	RecName: Full=Putative leucine-rich repeat receptor-like serine/threonine-protein kinase At2g24130; EC=2.7.11.1; Flags: Precursor;	SubName: Full=Putative leucine-rich repeat receptor-like protein kinase family protein {ECO:0000313|EMBL:AQK82787.1};	--	GO:0016021,integral component of membrane; GO:0005886,plasma membrane; GO:0005524,ATP binding; GO:0004674,protein serine/threonine kinase activity	PF00069.25:Protein kinase domain
gene-LOC103629867	NC_050101.1	118966775	118968170	+	3.24	3.64	1.59	8.32	9.65	18.87	1.961	0.00144568	0.0415989	up	K16286 E3 ubiquitin-protein ligase EL5 [EC:2.3.2.27] | (RefSeq) LOC109740546; E3 ubiquitin-protein ligase EL5-like (A)	RING-H2 finger protein ATL3 [Zea mays]	RecName: Full=RING-H2 finger protein ATL3; EC=2.3.2.27 {ECO:0000305}; AltName: Full=RING-type E3 ubiquitin transferase ATL3 {ECO:0000305};	SubName: Full=Putative RING zinc finger domain superfamily protein {ECO:0000313|EMBL:AQK82828.1};	FOG: Predicted E3 ubiquitin ligase	GO:0016021,integral component of membrane; GO:0046872,metal ion binding; GO:0061630,ubiquitin protein ligase activity; GO:0043161,proteasome-mediated ubiquitin-dependent protein catabolic process	PF13639.6:Ring finger domain
gene-LOC103629942	NC_050101.1	124545701	124546825	+	3.67	3.57	3.62	1.63	1.25	1.89	-1.388	0.000971232	0.0310017	down	--	uncharacterized protein LOC103629942 [Zea mays]	--	SubName: Full=Uncharacterized protein {ECO:0000313|EMBL:AQK83391.1, ECO:0000313|EnsemblPlants:Zm00001d037243_P001};	--	--	--
gene-LOC103630140	NC_050101.1	143121896	143123406	-	0	0.05	0.12	4.33	3.09	4.89	6.017	1.63127e-11	6.97285e-09	up	K13422 transcription factor MYC2 | (RefSeq) transcription factor MYC2-like (A)	putative transcription factor bHLH041 [Zea mays]	RecName: Full=Putative transcription factor bHLH041; AltName: Full=Basic helix-loop-helix protein 41; Short=AtbHLH41; Short=bHLH 41; AltName: Full=Transcription factor EN 51; AltName: Full=bHLH transcription factor bHLH041;	SubName: Full=Putative HLH DNA-binding domain superfamily protein {ECO:0000313|EMBL:AQK84725.1};	--	GO:0005634,nucleus; GO:0003677,DNA binding; GO:0003700,DNA-binding transcription factor activity; GO:0046983,protein dimerization activity; GO:0006355,regulation of transcription, DNA-templated; GO:0010200,response to chitin; GO:0006351,transcription, DNA-templated	PF00010.26:Helix-loop-helix DNA-binding domain
gene-LOC103630209	NC_050101.1	148479107	148480645	-	0.12	0.08	0.27	3.53	3.66	2.22	4.095	3.74835e-14	2.90932e-11	up	--	NRR repressor homolog 1 [Zea mays]	RecName: Full=NRR repressor homolog 1 {ECO:0000305};	SubName: Full=Uncharacterized protein {ECO:0000313|EMBL:AQK85177.1, ECO:0000313|EnsemblPlants:Zm00001d037909_P001};	--	GO:0005634,nucleus; GO:0006952,defense response; GO:0010112,regulation of systemic acquired resistance	PF15699.5:NPR1 interacting
gene-LOC103630232	NC_050101.1	149645898	149647535	+	2.46	1.06	0.95	10.33	13.62	18.42	2.974	2.60797e-06	0.000259189	up	K16286 E3 ubiquitin-protein ligase EL5 [EC:2.3.2.27] | (RefSeq) E3 ubiquitin-protein ligase EL5-like (A)	E3 ubiquitin-protein ligase EL5 [Zea mays]	RecName: Full=RING-H2 finger protein ATL64; EC=2.3.2.27 {ECO:0000305}; AltName: Full=RING-type E3 ubiquitin transferase ATL64 {ECO:0000305};	SubName: Full=Putative RING zinc finger domain superfamily protein {ECO:0000313|EMBL:AQK85267.1};	FOG: Predicted E3 ubiquitin ligase	GO:0005769,early endosome; GO:0005798,Golgi-associated vesicle; GO:0016021,integral component of membrane; GO:0005886,plasma membrane; GO:0046872,metal ion binding; GO:0061630,ubiquitin protein ligase activity; GO:0071470,cellular response to osmotic stress; GO:0043161,proteasome-mediated ubiquitin-dependent protein catabolic process; GO:0030100,regulation of endocytosis; GO:1901000,regulation of…	PF13639.6:Ring finger domain
gene-LOC103630240	NC_050101.1	150547270	150549837	-	1.26	1.16	0.89	13.36	12.13	19.77	3.595	7.54207e-13	4.27809e-10	up	--	uncharacterized protein LOC103630240 [Zea mays]	--	SubName: Full=PAR1 protein {ECO:0000313|EMBL:AQK85345.1};	--	--	PF06521.11:PAR1 protein
gene-LOC103630470	NC_050101.1	164425038	164427713	+	0.58	0.76	0.49	1.89	1.82	2.25	1.519	0.00136675	0.039676	up	K09286 EREBP-like factor | (RefSeq) dehydration-responsive element-binding protein 2D (A)	dehydration-responsive element-binding protein 2D [Zea mays]	RecName: Full=Dehydration-responsive element-binding protein 2D; Short=Protein DREB2D;	SubName: Full=Dehydration-responsive element-binding protein 2E {ECO:0000313|EMBL:AQK86641.1};	--	GO:0005634,nucleus; GO:0003700,DNA-binding transcription factor activity; GO:0043565,sequence-specific DNA binding; GO:0044212,transcription regulatory region DNA binding; GO:0045893,positive regulation of transcription, DNA-templated; GO:0010200,response to chitin; GO:0006351,transcription, DNA-templated	PF00847.20:AP2 domain
gene-LOC103630507	NW_023367182.1	7681	43313	+	0	0	0	0.15	0.04	0.4	6.103	0.000502863	0.0191374	up	K20718 LRR receptor-like serine/threonine-protein kinase ERECTA [EC:2.7.11.1] | (RefSeq) LRR receptor-like serine/threonine-protein kinase ERECTA (A)	probable LRR receptor-like serine/threonine-protein kinase At1g06840 isoform X3 [Zea mays]	RecName: Full=Probable LRR receptor-like serine/threonine-protein kinase At1g06840; EC=2.7.11.1; Flags: Precursor;	SubName: Full=Leucine-rich repeat protein kinase family protein {ECO:0000313|EMBL:AQK86770.1};	--	GO:0016021,integral component of membrane; GO:0016020,membrane; GO:0005886,plasma membrane; GO:0005524,ATP binding; GO:0004674,protein serine/threonine kinase activity	PF00069.25:Protein kinase domain
gene-LOC103630536	NC_050101.1	167082131	167085696	-	0.34	0.57	0.58	1.84	1.11	2.34	1.705	0.000988055	0.0313689	up	K06883 uncharacterized protein | (RefSeq) LOW QUALITY PROTEIN: uncharacterized protein LOC104799061 (A)	putative receptor-like protein kinase At4g00960 [Zea mays]	RecName: Full=Cysteine-rich receptor-like protein kinase 25; Short=Cysteine-rich RLK25; EC=2.7.11.-; Flags: Precursor;	SubName: Full=Uncharacterized protein {ECO:0000313|EMBL:AGT15891.1};	--	GO:0016021,integral component of membrane; GO:0005886,plasma membrane; GO:0005524,ATP binding; GO:0004674,protein serine/threonine kinase activity; GO:0042742,defense response to bacterium; GO:0006468,protein phosphorylation	PF00069.25:Protein kinase domain
gene-LOC103630663	NC_050101.1	172967712	172969263	+	10.68	9.71	5.43	28.26	28.27	53.16	1.897	0.000878311	0.0291066	up	K12835 ATP-dependent RNA helicase DDX42 [EC:3.6.4.13] | (RefSeq) DEAD-box ATP-dependent RNA helicase 24 isoform X1 (A)	probable WRKY transcription factor 50 [Zea mays]	RecName: Full=Probable WRKY transcription factor 51; AltName: Full=WRKY DNA-binding protein 51;	SubName: Full=Putative WRKY DNA-binding domain superfamily protein {ECO:0000313|EMBL:AQK88033.1}; SubName: Full=WRKY transcription factor {ECO:0000313|EMBL:AIB05854.1}; Flags: Fragment;	--	GO:0005634,nucleus; GO:0003700,DNA-binding transcription factor activity; GO:0043565,sequence-specific DNA binding; GO:0042742,defense response to bacterium; GO:0050832,defense response to fungus; GO:0009867,jasmonic acid mediated signaling pathway; GO:0006351,transcription, DNA-templated	PF03106.15:WRKY DNA -binding domain
gene-LOC103630784	NC_050101.1	178107386	178108702	+	1.46	1.14	1.15	11.45	12.29	19.8	3.354	3.75499e-11	1.45723e-08	up	--	predicted GPI-anchored protein 58 [Zea mays]	--	SubName: Full=Tie-dyed 1 {ECO:0000313|EMBL:ACL35770.1}; SubName: Full=Tie-dyed1 {ECO:0000313|EMBL:AQK88804.1};	--	GO:0016021,integral component of membrane	--
gene-LOC103631147	NC_050101.1	83998684	84001731	+	0.94	1.98	2.03	4.01	4.47	3.86	1.152	9.38883e-05	0.00508099	up	K10268 F-box and leucine-rich repeat protein 2/20 | (RefSeq) F-box/LRR-repeat protein 4-like (A)	F-box/LRR-repeat MAX2 homolog [Zea mays]	RecName: Full=F-box/LRR-repeat MAX2 homolog; AltName: Full=F-box and leucine-rich repeat MAX2 homolog; AltName: Full=Protein DWARF 3;	SubName: Full=F-box protein MAX2 {ECO:0000313|EMBL:AQK80457.1};	--	GO:0005634,nucleus; GO:0009926,auxin polar transport; GO:0042335,cuticle development; GO:0007275,multicellular organism development; GO:0010187,negative regulation of seed germination; GO:1902584,positive regulation of response to water deprivation; GO:0009934,regulation of meristem structural organization; GO:0009416,response to light stimulus; GO:0009414,response to water deprivation; GO:001001…	PF18511.1:F-box
gene-LOC103631225	NC_050096.1	5417355	5419652	-	2.07	3.44	4.84	8.37	11.51	7.34	1.2	0.00011902	0.00614778	up	K15746 beta-carotene 3-hydroxylase [EC:1.14.15.24] | (RefSeq) beta-carotene 3-hydroxylase, chloroplastic (A)	beta-carotene 3-hydroxylase, chloroplastic [Zea mays]	RecName: Full=Beta-carotene 3-hydroxylase, chloroplastic; Short=GenCHYB; EC=1.14.15.24 {ECO:0000250|UniProtKB:Q9SZZ8}; Flags: Precursor;	SubName: Full=Hydroxylase8 {ECO:0000313|EMBL:ONL93153.1};	--	GO:0031969,chloroplast membrane; GO:0016021,integral component of membrane; GO:0016787,hydrolase activity; GO:0005506,iron ion binding; GO:0016491,oxidoreductase activity; GO:0016117,carotenoid biosynthetic process	PF04116.13:Fatty acid hydroxylase superfamily
gene-LOC103631795	NC_050096.1	17257251	17260734	+	0	0	0	0.44	0.2	0.58	6.466	1.35618e-05	0.00104164	up	K00485 dimethylaniline monooxygenase (N-oxide forming) [EC:1.14.13.8] | (RefSeq) probable flavin-containing monooxygenase 1 (A)	probable flavin-containing monooxygenase 1 [Zea mays]	RecName: Full=Probable flavin-containing monooxygenase 1; EC=1.14.13.-;	RecName: Full=Flavin-containing monooxygenase {ECO:0000256|RuleBase:RU361177}; EC=1.-.-.- {ECO:0000256|RuleBase:RU361177};	Flavin-containing monooxygenase	GO:0050660,flavin adenine dinucleotide binding; GO:0004497,monooxygenase activity; GO:0004499,N,N-dimethylaniline monooxygenase activity; GO:0050661,NADP binding; GO:0071456,cellular response to hypoxia; GO:0009870,defense response signaling pathway, resistance gene-dependent; GO:0010204,defense response signaling pathway, resistance gene-independent; GO:0042742,defense response to bacterium; GO:…	PF00743.19:Flavin-binding monooxygenase-like
gene-LOC103631809	NC_050096.1	17824632	17825817	-	2.28	1.13	0.86	0.05	0.19	0.1	-3.984	1.11496e-05	0.000879643	down	--	uncharacterized protein LOC103631809 [Zea mays]	RecName: Full=Protein MARD1 {ECO:0000303|PubMed:15159630}; AltName: Full=Mediator of ABA-regulated dormancy1 {ECO:0000303|PubMed:15159630}; AltName: Full=Senescence-associated protein SAG102 {ECO:0000303|PubMed:11402199};	SubName: Full=Uncharacterized protein {ECO:0000313|EMBL:ONL94307.1, ECO:0000313|EnsemblPlants:Zm00001d027932_P001};	--	GO:0010494,cytoplasmic stress granule; GO:0000932,P-body; GO:0046872,metal ion binding; GO:0009737,response to abscisic acid; GO:0010162,seed dormancy process	PF04570.14:zinc-finger of the FCS-type, C2-C2
gene-LOC103631904	NC_050102.1	2683720	2685827	+	0.38	0.39	0.16	1.97	1.94	2.72	2.638	4.38253e-06	0.000405199	up	K13681 xyloglucan fucosyltransferase [EC:2.4.1.-] | (RefSeq) probable fucosyltransferase 8 (A)	probable fucosyltransferase 8 [Zea mays]	RecName: Full=Galactoside 2-alpha-L-fucosyltransferase; EC=2.4.1.-; AltName: Full=PsFT1; AltName: Full=Xyloglucan alpha-(1,2)-fucosyltransferase;	SubName: Full=Galactoside 2-alpha-L-fucosyltransferase {ECO:0000313|EMBL:ONM51145.1};	--	GO:0032580,Golgi cisterna membrane; GO:0016021,integral component of membrane; GO:0008107,galactoside 2-alpha-L-fucosyltransferase activity; GO:0042546,cell wall biogenesis; GO:0071555,cell wall organization; GO:0006486,protein glycosylation	PF03254.13:Xyloglucan fucosyltransferase
gene-LOC103631909	NC_050102.1	2848384	2851876	+	0.07	0.12	0.06	0.69	0.39	0.47	2.423	0.000406058	0.0161188	up	--	uncharacterized protein LOC103631909 [Zea mays]	--	SubName: Full=OSJNBb0004G23.8-like protein {ECO:0000313|EMBL:ONM51154.1};	--	--	PF08224.11:Domain of unknown function (DUF1719)
gene-LOC103631918	NC_050102.1	3351160	3352028	+	3.24	3.79	1.8	31.48	50.49	48.03	3.665	1.41072e-14	1.1888e-11	up	K13449 pathogenesis-related protein 1 | (RefSeq) pathogenesis-related protein PRB1-3 (A)	pathogenesis-related protein PRB1-3 [Zea mays]	RecName: Full=Pathogenesis-related protein 1; Flags: Precursor;	SubName: Full=Pathogenesis-related protein 1 {ECO:0000313|EMBL:ONM51202.1};	Defense-related protein containing SCP domain	GO:0005576,extracellular region; GO:0006952,defense response; GO:0009607,response to biotic stimulus	PF00188.26:Cysteine-rich secretory protein family
gene-LOC103631958	NC_050102.1	6867994	6869840	-	1.88	2.11	1.82	0.33	0.63	0.56	-2.154	9.05748e-07	0.000102353	down	K22639 trimethyltridecatetraene/dimethylnonatriene synthase [EC:1.14.14.58 1.14.14.59] | (RefSeq) flavonoid 3'-monooxygenase (A)	flavonoid 3'-monooxygenase [Zea mays]	RecName: Full=Flavonoid 3'-monooxygenase; EC=1.14.13.21; AltName: Full=Cytochrome P450 75B1; AltName: Full=Flavonoid 3'-hydroxylase; Short=AtF3'H; AltName: Full=Protein TRANSPARENT TESTA 7;	SubName: Full=Cytochrome P-450 19 {ECO:0000313|EMBL:ONM51434.1};	Cytochrome P450 CYP2 subfamily	GO:0005789,endoplasmic reticulum membrane; GO:0016021,integral component of membrane; GO:0016020,membrane; GO:0016711,flavonoid 3'-monooxygenase activity; GO:0020037,heme binding; GO:0005506,iron ion binding; GO:0009813,flavonoid biosynthetic process; GO:0009733,response to auxin; GO:0044550,secondary metabolite biosynthetic process	PF00067.22:Cytochrome P450
gene-LOC103631967	NC_050102.1	7356066	7357564	-	0.81	0.52	0.69	0.03	0.07	0.1	-3.55	2.62347e-05	0.00179242	down	K14493 gibberellin receptor GID1 [EC:3.-.-.-] | (RefSeq) gibberellin receptor GID1C-like isoform X2 (A)	probable carboxylesterase 15 [Zea mays]	RecName: Full=Probable carboxylesterase 15; AltName: Full=AtCXE15; EC=3.1.1.1;	SubName: Full=Putative carboxylesterase 15 {ECO:0000313|EMBL:ONM51451.1};	Arylacetamide deacetylase	GO:0052689,carboxylic ester hydrolase activity; GO:0016787,hydrolase activity; GO:0009056,catabolic process	PF07859.13:alpha/beta hydrolase fold
gene-LOC103632086	NC_050102.1	15019539	15020565	+	3.39	2.33	1.85	7.93	9.99	9.9	1.622	0.00070719	0.0248604	up	--	cysteine-rich and transmembrane domain-containing protein WIH2 [Zea mays]	--	SubName: Full=Uncharacterized protein {ECO:0000313|EMBL:ONM52085.1, ECO:0000313|EnsemblPlants:Zm00001d019069_P002};	--	--	PF12734.7:Cysteine-rich TM module stress tolerance
gene-LOC103632243	NC_050102.1	34348260	34349821	-	3.08	2.32	0.96	18.14	8.68	19.14	2.611	7.7847e-05	0.00435479	up	--	CASP-like protein 1D1 [Zea mays]	RecName: Full=CASP-like protein 1D1; Short=ZmCASPL1D1;	RecName: Full=CASP-like protein {ECO:0000256|RuleBase:RU361233};	--	GO:0016021,integral component of membrane; GO:0005886,plasma membrane	PF04535.12:Domain of unknown function (DUF588)
gene-LOC103632278	NC_050102.1	41272858	41279785	-	29.49	48.8	55.71	28.34	26.37	13.77	-1.195	9.05619e-06	0.000746098	down	--	COP1-interacting protein 7 [Zea mays]	RecName: Full=COP1-interacting protein 7 {ECO:0000303|PubMed:9668129};	SubName: Full=COP1-interacting protein-related {ECO:0000313|EMBL:ONM53148.1};	--	GO:0005634,nucleus; GO:0005886,plasma membrane; GO:0009718,anthocyanin-containing compound biosynthetic process; GO:0015995,chlorophyll biosynthetic process; GO:0045893,positive regulation of transcription, DNA-templated; GO:0009416,response to light stimulus; GO:0006351,transcription, DNA-templated	--
gene-LOC103632609	NC_050102.1	98158059	98159566	-	0	0	0.04	0.88	0.38	0.93	5.53	9.89366e-05	0.00527674	up	K18054 2'-deoxymugineic-acid 2'-dioxygenase / mugineic-acid 3-dioxygenase [EC:1.14.11.24 1.14.11.25] | (RefSeq) 2'-deoxymugineic-acid 2'-dioxygenase (A)	2'-deoxymugineic-acid 2'-dioxygenase [Zea mays]	RecName: Full=2'-deoxymugineic-acid 2'-dioxygenase; EC=1.14.11.24; AltName: Full=Protein iron deficiency-specific 3;	SubName: Full=Protein DOWNY MILDEW RESISTANCE 6 {ECO:0000313|EMBL:ONM54389.1};	Iron/ascorbate family oxidoreductases	GO:0005737,cytoplasm; GO:0033760,2'-deoxymugineic-acid 2'-dioxygenase activity; GO:0031418,L-ascorbic acid binding; GO:0046872,metal ion binding; GO:0010041,response to iron(III) ion	PF03171.20:2OG-Fe(II) oxygenase superfamily
gene-LOC103632658	NC_050102.1	105175950	105178857	+	0.63	0.94	0.86	1.75	1.97	2.34	1.156	0.00188398	0.0497012	up	--	uncharacterized protein LOC103632658 [Zea mays]	--	SubName: Full=VQ motif-containing protein {ECO:0000313|EMBL:ONM54641.1};	--	--	PF05678.14:VQ motif
gene-LOC103632694	NC_050102.1	108939963	108942489	-	1.22	1.5	0.4	0.11	0.2	0.25	-2.688	0.000300906	0.0127513	down	K13260 isoflavone/4'-methoxyisoflavone 2'-hydroxylase [EC:1.14.13.89 1.14.13.53] | (RefSeq) cytochrome P450 family 81 protein (A)	isoflavone 3'-hydroxylase isoform X3 [Zea mays]	RecName: Full=Isoflavone 2'-hydroxylase {ECO:0000303|PubMed:14617078}; EC=1.14.13.53 {ECO:0000269|PubMed:14617078}; AltName: Full=4'-methoxyisoflavone 2'-hydroxylase; AltName: Full=Cytochrome P450 81E7 {ECO:0000303|PubMed:14617078};	SubName: Full=Cytochrome P450 family 81 subfamily D polypeptide 8 {ECO:0000313|EMBL:ONM54729.1};	Cytochrome P450 CYP2 subfamily	GO:0005789,endoplasmic reticulum membrane; GO:0016021,integral component of membrane; GO:0047957,4'-methoxyisoflavone 2'-hydroxylase activity; GO:0020037,heme binding; GO:0005506,iron ion binding	PF00067.22:Cytochrome P450
gene-LOC103632716	NC_050102.1	112564599	112566701	+	9.78	9.41	9.67	3.61	6.72	4.44	-1.213	0.000700859	0.0246967	down	K22736 vacuolar iron transporter family protein | (RefSeq) vacuolar iron transporter 1.2-like (A)	vacuolar iron transporter 1.2-like [Zea mays]	RecName: Full=Vacuolar iron transporter 1.2; Short=OsVIT1.2;	SubName: Full=Protein CCC1 {ECO:0000313|EMBL:ACG27680.1};	Uncharacterized membrane protein	GO:0016021,integral component of membrane; GO:0005774,vacuolar membrane; GO:0005381,iron ion transmembrane transporter activity; GO:0005384,manganese ion transmembrane transporter activity; GO:0030026,cellular manganese ion homeostasis; GO:0071281,cellular response to iron ion; GO:0006880,intracellular sequestering of iron ion; GO:0071421,manganese ion transmembrane transport	PF01988.19:VIT family
gene-LOC103632819	NC_050102.1	126956534	126958827	+	3.38	3.67	3.61	17.79	16.26	31.5	2.48	2.55231e-07	3.53417e-05	up	K20623 typhasterol/6-deoxotyphasterol 2alpha-hydroxylase | (RefSeq) cytochrome P450 71A1 (A)	cytochrome P450 71A1 [Zea mays]	RecName: Full=Cytochrome P450 71A1; EC=1.14.-.-; AltName: Full=ARP-2; AltName: Full=CYPLXXIA1;	SubName: Full=Cytochrome P450 84A1 {ECO:0000313|EMBL:ONM55293.1};	Cytochrome P450 CYP2 subfamily	GO:0005789,endoplasmic reticulum membrane; GO:0016021,integral component of membrane; GO:0031090,organelle membrane; GO:0020037,heme binding; GO:0005506,iron ion binding; GO:0004497,monooxygenase activity; GO:0016705,oxidoreductase activity, acting on paired donors, with incorporation or reduction of molecular oxygen; GO:0009835,fruit ripening	PF00067.22:Cytochrome P450
gene-LOC103632927	NC_050102.1	137454138	137455037	+	11.76	6.75	3	1.64	2.12	1.84	-2.273	0.000562959	0.0208854	down	--	uncharacterized protein LOC103632927 [Zea mays]	--	SubName: Full=Uncharacterized protein {ECO:0000313|EMBL:EER96959.1};	--	GO:0005509,calcium ion binding	PF00036.32:EF hand
gene-LOC103632960	NC_050102.1	143777601	143778887	+	0.23	0.14	0	2.48	2.11	1.91	3.902	4.07617e-07	5.24989e-05	up	K09286 EREBP-like factor | (RefSeq) ethylene-responsive transcription factor RAP2-3-like (A)	ethylene-responsive transcription factor 11 [Zea mays]	RecName: Full=Ethylene-responsive transcription factor ERF114 {ECO:0000303|PubMed:16407444}; AltName: Full=ERF bud enhancer {ECO:0000303|PubMed:23616605};	SubName: Full=AP2-EREBP transcription factor {ECO:0000313|EMBL:AIB05330.1}; SubName: Full=Ethylene-responsive transcription factor ERF112 {ECO:0000313|EMBL:ONM56278.1}; Flags: Fragment;	--	GO:0005634,nucleus; GO:0003700,DNA-binding transcription factor activity; GO:0043565,sequence-specific DNA binding; GO:0050832,defense response to fungus; GO:0009873,ethylene-activated signaling pathway; GO:0007275,multicellular organism development; GO:0006351,transcription, DNA-templated	PF00847.20:AP2 domain
gene-LOC103633022	NC_050102.1	145514786	145515819	-	0.53	0.81	0.32	2.07	2.33	5.57	2.483	0.000582499	0.0214753	up	--	uncharacterized protein LOC103633022 [Zea mays]	--	SubName: Full=Uncharacterized protein {ECO:0000313|EMBL:ONM56398.1, ECO:0000313|EnsemblPlants:Zm00001d021160_P001};	--	--	--
gene-LOC103633098	NC_050102.1	150002080	150016208	+	0.26	0.42	0.23	0.11	0.13	0.1	-1.619	0.00132264	0.0388157	down	--	--	--	--	--	--	--
gene-LOC103633148	NC_050096.1	29679945	29683538	-	0.92	1.05	0.69	6.61	6.21	8.03	2.783	4.52888e-11	1.7125e-08	up	--	probable inactive poly [ADP-ribose]	RecName: Full=Inactive poly [ADP-ribose] polymerase RCD1; AltName: Full=Protein RADICAL-INDUCED CELL DEATH 1;	SubName: Full=Putative inactive poly [ADP-ribose] polymerase SRO1 {ECO:0000313|EMBL:ONL95402.1};	--	GO:0005737,cytoplasm; GO:0016363,nuclear matrix; GO:0005634,nucleus; GO:0003950,NAD+ ADP-ribosyltransferase activity; GO:0009816,defense response to bacterium, incompatible interaction; GO:0009793,embryo development ending in seed dormancy; GO:0009873,ethylene-activated signaling pathway; GO:0009867,jasmonic acid mediated signaling pathway; GO:0010102,lateral root morphogenesis; GO:0006809,nitric…	PF12174.8:RCD1-SRO-TAF4 (RST) plant domain
gene-LOC103633204	NC_050102.1	160108225	160110660	+	3.26	2.79	1.53	8.72	7.92	13.62	1.785	0.00131558	0.0386858	up	K12938 anthocyanidin 5,3-O-glucosyltransferase [EC:2.4.1.-] | (RefSeq) anthocyanidin 5,3-O-glucosyltransferase (A)	anthocyanidin 3-O-glucosyltransferase 2 [Zea mays]	RecName: Full=Anthocyanidin 5,3-O-glucosyltransferase; EC=2.4.1.-; AltName: Full=UDP-glucose: anthocyanidin 5,3-O-glucosyltransferase;	RecName: Full=Glycosyltransferase {ECO:0000256|RuleBase:RU362057}; EC=2.4.1.- {ECO:0000256|RuleBase:RU362057};	UDP-glucuronosyl and UDP-glucosyl transferase	GO:0016758,transferase activity, transferring hexosyl groups; GO:0009718,anthocyanin-containing compound biosynthetic process	PF00201.18:UDP-glucoronosyl and UDP-glucosyl transferase
gene-LOC103633231	NC_050102.1	162302932	162303886	+	7.15	8.3	8.95	3.52	3.17	2.78	-1.588	4.24228e-09	9.57973e-07	down	K13993 HSP20 family protein | (RefSeq) 18.8 kDa class V heat shock protein (A)	18.8 kDa class V heat shock protein [Zea mays]	RecName: Full=18.8 kDa class V heat shock protein; AltName: Full=18.8 kDa heat shock protein; Short=OsHsp18.8;	SubName: Full=Hsp20/alpha crystallin family protein {ECO:0000313|EMBL:ACG27403.1};	Molecular chaperone (small heat-shock protein Hsp26/Hsp42)	GO:0005737,cytoplasm; GO:0009408,response to heat	PF00011.21:Hsp20/alpha crystallin family
gene-LOC103633239	NC_050102.1	162692710	162704641	+	0.07	0.39	0.31	1.62	0.97	1.19	2.185	7.64572e-05	0.00429529	up	K08712 ATP-binding cassette, subfamily G (WHITE), member 2, SNQ2 | (RefSeq) ABC transporter, ATP-binding protein (A)	ABC transporter G family member 43 [Zea mays]	RecName: Full=ABC transporter G family member 43 {ECO:0000303|PubMed:18299247}; Short=OsABCG43 {ECO:0000303|PubMed:18299247}; AltName: Full=Pleiotropic drug resistance protein 5 {ECO:0000303|PubMed:12644668, ECO:0000303|PubMed:16506311}; Short=OsPDR5 {ECO:0000303|PubMed:16506311};	SubName: Full=ABC transporter G family member 34 {ECO:0000313|EMBL:ONM57828.1};	Pleiotropic drug resistance proteins (PDR1-15), ABC superfamily	GO:0016021,integral component of membrane; GO:0005886,plasma membrane; GO:0005524,ATP binding; GO:0042626,ATPase activity, coupled to transmembrane movement of substances	PF01061.24:ABC-2 type transporter
gene-LOC103633265	NC_050102.1	164248880	164253636	-	2.27	1.6	0.6	0.29	0.35	0.31	-2.543	0.000122929	0.0063055	down	K06883 uncharacterized protein | (RefSeq) LOW QUALITY PROTEIN: uncharacterized protein LOC104799061 (A)	cysteine-rich receptor-like protein kinase 10 [Zea mays]	RecName: Full=Cysteine-rich receptor-like protein kinase 10 {ECO:0000305}; Short=Cysteine-rich RLK10 {ECO:0000305}; EC=2.7.11.- {ECO:0000305}; Flags: Precursor;	SubName: Full=Uncharacterized protein {ECO:0000313|EMBL:EER97332.2};	--	GO:0016021,integral component of membrane; GO:0005886,plasma membrane; GO:0005524,ATP binding; GO:0004674,protein serine/threonine kinase activity; GO:0042742,defense response to bacterium; GO:0006468,protein phosphorylation	PF00069.25:Protein kinase domain
gene-LOC103633340	--	--	--	--	20.9	10.91	7.76	3.69	2.93	2.69	-2.427	1.26887e-05	0.000977129	down	--
gene-LOC103633356	NC_050102.1	169963665	169966129	+	3.2	2.49	1.43	12.34	10.6	21.16	2.426	4.52984e-05	0.00281863	up	K08150 MFS transporter, SP family, solute carrier family 2 (myo-inositol transporter), member 13 | (RefSeq) inositol transporter 1-like (A)	polyol transporter 5 [Zea mays]	RecName: Full=Polyol transporter 5; AltName: Full=Protein POLYOL TRANSPORTER 5; Short=AtPLT5; AltName: Full=Sugar-proton symporter PLT5;	SubName: Full=Putative polyol transporter 1 {ECO:0000313|EMBL:ONM59090.1};	Predicted transporter (major facilitator superfamily)	GO:0016021,integral component of membrane; GO:0005886,plasma membrane; GO:0015591,D-ribose transmembrane transporter activity; GO:0015148,D-xylose transmembrane transporter activity; GO:0005354,galactose transmembrane transporter activity; GO:0005355,glucose transmembrane transporter activity; GO:0015168,glycerol transmembrane transporter activity; GO:0015575,mannitol transmembrane transporter ac…	PF00083.24:Sugar (and other) transporter
gene-LOC103633540	NC_050102.1	180888454	180892645	+	31.53	48.61	41.71	22.48	22.41	13.59	-1.291	3.67486e-11	1.44515e-08	down	K14724 solute carrier family 9 (sodium/hydrogen exchanger), member 8 | (RefSeq) sodium/hydrogen exchanger 2-like (A)	sodium/hydrogen exchanger 2-like [Zea mays]	RecName: Full=Sodium/hydrogen exchanger 2; AltName: Full=Na(+)/H(+) exchanger 2; Short=NHE-2;	RecName: Full=Sodium/hydrogen exchanger {ECO:0000256|RuleBase:RU003722};	Sodium/hydrogen exchanger protein	GO:0016021,integral component of membrane; GO:0005886,plasma membrane; GO:0005774,vacuolar membrane; GO:0015386,potassium:proton antiporter activity; GO:0015385,sodium:proton antiporter activity; GO:0055075,potassium ion homeostasis; GO:0010107,potassium ion import; GO:0051453,regulation of intracellular pH; GO:0090333,regulation of stomatal closure; GO:0009651,response to salt stress; GO:0098719…	PF00999.21:Sodium/hydrogen exchanger family
gene-LOC103633548	NC_050102.1	181572581	181573712	+	24.88	14.34	9.15	1.67	2.31	6.32	-2.42	0.00170691	0.0465284	down	--	flowering-promoting factor 1-like protein 5 [Zea mays]	RecName: Full=Flowering-promoting factor 1-like protein 5; AltName: Full=FPF1-like protein 5;	SubName: Full=FPF1-like protein 1 {ECO:0000313|EMBL:ONM60728.1};	--	--	--
gene-LOC103633564	NC_050102.1	182242810	182245581	-	0.66	0.33	0.14	13.76	11.06	19.43	5.044	4.42257e-13	2.66203e-10	up	K16225 probable WRKY transcription factor 52 | (RefSeq) disease resistance protein RRS1-like (A)	probable WRKY transcription factor 70 [Zea mays]	RecName: Full=Probable WRKY transcription factor 70; AltName: Full=WRKY DNA-binding protein 70;	SubName: Full=Putative WRKY transcription factor 30 {ECO:0000313|EMBL:ONM60618.1};	--	GO:0005634,nucleus; GO:0003700,DNA-binding transcription factor activity; GO:0043565,sequence-specific DNA binding; GO:0042742,defense response to bacterium; GO:0050832,defense response to fungus; GO:0009864,induced systemic resistance, jasmonic acid mediated signaling pathway; GO:1900056,negative regulation of leaf senescence; GO:0045892,negative regulation of transcription, DNA-templated; GO:00…	PF03106.15:WRKY DNA -binding domain
gene-LOC103633591	NC_050102.1	183339444	183341297	-	6.63	11.7	16.71	6.49	5.83	2.18	-1.506	0.000318566	0.0132522	down	--	glycine-rich cell wall structural protein [Zea mays]	--	--	--	--	--
[truncated: 306 more rows]

## Sheet: Table S2b
Table S2: Differentially expressed genes of established transcriptional K+ deficiency in relative to control in DH605 (a) and Z58 (b).
[truncated: 1,107 more rows]

## Sheet: Table S3a
Table S3 Gene ontology (Go) enrichment analyses under K+ deficiency in DH605 (a) and Z58 (b).
[truncated: 71 more rows]

[truncated: 4 more sheets: Table S3b, Table S4, Table S5a, Table S5b]
